# Supplementary material for: Ligand-controlled cobalt-catalyzed isomerization and reductive C–O bond cleavage of allylic ethers
Source: Royal Society of Chemistry journal article supplement (doi:10.1039/d3qo00852e), 2023-01-01
Supplement: d3qo00852e1.pdf [file d3qo00852e1.pdf]

Supporting information for:

Ligand-Controlled Cobalt-Catalyzed Isomerization and Reductive C-O Bond Cleavage of Allylic Ethers

Lijun Chang, Cheng Cai, Ran Chen, Jianhui Chen,\* Yanshu Luo, Yuanzhi Xia\*

College of Chemistry and Materials Engineering, Wenzhou University, Wenzhou 325035, China

[cjh@wzu.edu.cn](mailto:cjh@wzu.edu.cn); [xyz@wzu.edu.cn](mailto:xyz@wzu.edu.cn)

**Table of Contents:**

| Entry | Content                                                      | Page |
|-------|--------------------------------------------------------------|------|
| I     | General information                                          | S2   |
| II    | Procedures for the synthesis of starting materials           | S2   |
| III   | Cobalt-catalyzed isomerization of allyl ethers               | S11  |
| IV    | Cobalt-catalyzed reductive C-O bond cleavage of allyl ethers | S22  |
| V     | Gram-scale reactions                                         | S28  |
| VI    | Further derivatizations                                      | S28  |
| VII   | Preliminary mechanistic studies                              | S29  |
| VIII  | NMR Spectra                                                  | S34  |

## I. General information

THF, xylene, anisole, 1,4-dioxane, PhCl and Hexane were purchased from Energy Chemical and used as received. Toluene was distilled from sodium benzophenone ketyl prior to use. HBpin (98%), NaBHET<sub>3</sub> (1.0 mol/L in THF), Xantphos, DPEPhos and CoCl<sub>2</sub> (99%) were purchased from Energy Chemical and used as received. Bis(2-(diphenylphosphanyl)phenyl)amine (**PNP**),<sup>1</sup> and phosphine-amido-oxazoline ligand (**PAO**)<sup>2</sup> were prepared according to previously reported procedures, respectively. The other commercially available chemicals were used as received. NMR spectra were recorded on a Bruker-400 or Bruker-500 instrument. <sup>1</sup>H NMR chemical shifts were referenced to tetramethylsilane signal (0 ppm), <sup>13</sup>C NMR chemical shifts were referenced to the solvent resonance (77.00 ppm, CDCl<sub>3</sub>), <sup>19</sup>F NMR chemical shifts were referenced to the solvent resonance. The following abbreviations (or combinations thereof) were used to explain multiplicities: s = singlet, d = doublet, t = triplet, m = multiplet, br = broad, q = quadruplet. High-resolution mass spectra (HRMS) were recorded on a Bruker micrOTOF-Q II instrument (ESI). Melting points were obtained using a X-4 melting point apparatus (Laboratory Devices, Beijing taikē CO.; LTD.). In this report, all the reactions that require heating were using oil bath as the heating source.

## II. Procedures for the synthesis of starting materials

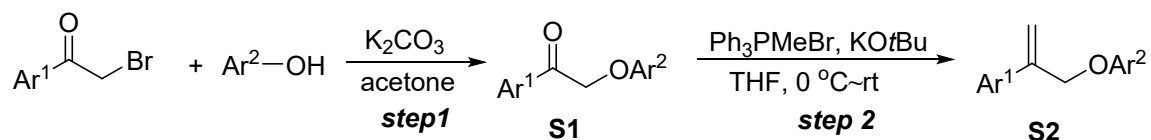

**Step 1:** According to a previously reported procedure,<sup>3</sup> a 250 mL round bottom flask equipped with a reflux condenser and a dropping funnel was charged with phenol (22 mmol), K<sub>2</sub>CO<sub>3</sub> (30 mmol) and acetone (50 mL). The mixture was added dropwisely with a solution of 2-bromoacetophenone (20 mmol in 50 mL of acetone) at room temperature over 30 mins. The resulting suspension was stirred at reflux overnight, cooled to room temperature, filtered and concentrated under reduced pressure. The residue was purified by recrystallization from petroleum ether to give the desired product **S1**.

**Step 2:** According to a previously reported procedure,<sup>4</sup> a 250 mL three-necked flask was charged with PPh<sub>3</sub>MeBr (24 mmol), KOtBu (24 mmol) and dried THF (50 mL) under argon. The mixture was stirred at 0 °C for 1 h, added

<sup>1</sup> L. Liang, P. Chien, J. Lin, M. Huang, Y. Huang, J. Liao, *Organometallics*. **2006**, *25*, 1399.

<sup>2</sup> H. Liu, C. Cai, Y. Ding, J. Chen, B. Liu, Y. Xia, *ACS Omega*. **2020**, *5*, 11655.

<sup>3</sup> T. Mete, D. Laha, R. Bhat, *ChemistrySelect* **2018**, *3*, 7656.

<sup>4</sup> G. Hoang, S. Zhang, J. Takacs, *Chem. Commun.* **2018**, *54*, 4838.

dropwisely with a solution of **S1** (20 mmol in 50 mL of dried THF). Then the resulted solution was stirred at room temperature overnight, passed through a pad of silica gel and washed with EA. The filtrate was concentrated and purified by flash column chromatography to give the desired product **S2**.

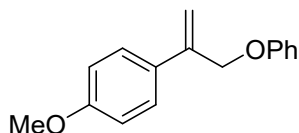

**1-methoxy-4-(3-phenoxyprop-1-en-2-yl)benzene (1a).**<sup>5</sup> White solid was obtained by silica gel column chromatography with PE/EA (50:1). 5.78 g, 24.1 mmol, 60% yield. <sup>1</sup>H NMR: (500 MHz, CDCl<sub>3</sub>): δ 7.43 (d, J = 8.5 Hz, 2H), 7.26-7.32 (m, 2H), 6.94-6.99 (m, 3H), 6.89 (d, J = 8.5 Hz, 2H), 5.53 (s, 1H), 5.37 (s, 1H), 4.87 (s, 2H), 3.82 (s, 3H).

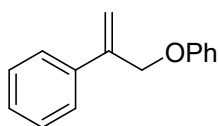

**(3-phenoxyprop-1-en-2-yl)benzene (1b).**<sup>6</sup> White solid was obtained by silica gel column chromatography with PE/EA (50:1). 1.51 g, 7.1 mmol, 60% yield. <sup>1</sup>H NMR: (500 MHz, CDCl<sub>3</sub>): δ 7.45-7.50 (m, 2H), 7.32-7.38 (m, 2H), 7.25-7.32 (m, 3H), 6.93-6.98 (m, 3H), 5.60 (s, 1H), 5.46 (s, 1H), 4.89 (s, 2H).

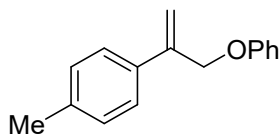

**1-methyl-4-(3-phenoxyprop-1-en-2-yl)benzene (1c).** Colorless oil was obtained by silica gel column chromatography with PE/EA (50:1). 2.40 g, 10.6 mmol, 71% yield. <sup>1</sup>H NMR: (500 MHz, CDCl<sub>3</sub>): δ 7.37 (d, J = 8.0 Hz, 2H), 7.25-7.30 (m, 2H), 7.15 (d, J = 8.0 Hz, 2H), 6.93-6.97 (m, 3H), 5.57 (s, 1H), 5.41 (s, 1H), 4.86 (s, 2H), 2.34 (s, 3H); <sup>13</sup>C NMR: (125.8 MHz, CDCl<sub>3</sub>) δ 158.7, 142.9, 137.8, 135.5, 129.4, 129.1, 125.9, 120.9, 115.0, 113.9, 69.8, 21.1. HRMS (ESI) m/z: [M + H]<sup>+</sup> Calcd for C<sub>16</sub>H<sub>17</sub>O<sup>+</sup> 225.1274, Found 225.1278.

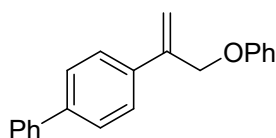

**(3-phenoxyprop-1-en-2-yl)-1,1'-biphenyl (1d).** White solid was obtained by silica gel column chromatography with PE/EA (50:1). 0.92 g, 3.2 mmol, 38% yield. M. P. 82.2-82.5 °C. <sup>1</sup>H NMR: (500 MHz, CDCl<sub>3</sub>) δ 7.63-7.54 (m,

<sup>5</sup> M. Organ, E. Arvanitis, C. Dixon, J. Cooper, *J. Am. Chem. Soc.* **2002**, *124*, 1288.

<sup>6</sup> M. Czyz, M. Taylor, T. Hornngren, A. Polyzos, *ACS Catal.* **2021**, *11*, 5472.

6H), 7.41-7.46 (m, 2H), 7.37-7.26 (m, 3H), 7.01 - 6.94 (m, 3H), 5.67 (s, 1H), 5.49 (s, 1H), 4.92 (s, 2H);  $^{13}\text{C}$  NMR: (125.8 MHz,  $\text{CDCl}_3$ )  $\delta$  158.7, 142.6, 140.8, 140.6, 137.2, 129.5, 128.8, 127.4, 127.2, 126.9, 126.4, 121.1, 115.0, 114.8, 69.8. HRMS (ESI)  $m/z$ :  $[\text{M} + \text{H}]^+$  Calcd for  $\text{C}_{21}\text{H}_{19}\text{O}^+$  287.1430, Found 287.1439.

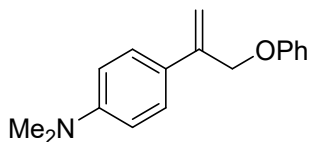

***N,N*-dimethyl-4-(3-phenoxyprop-1-en-2-yl)aniline (1e).** White solid was obtained by silica gel column chromatography with PE/EA (80:1). 0.46 g, 1.8 mmol, 46% yield. M. P. 52.7-53.0 °C.  $^1\text{H}$  NMR: (400MHz,  $\text{CDCl}_3$ )  $\delta$  7.39 (d,  $J = 8.4$  Hz, 2H), 7.23-7.31 (m, 2H), 6.92-7.00 (m, 3H), 6.70 (d,  $J = 8.8$  Hz, 2H), 5.48 (s, 1H), 5.27 (s, 1H), 4.87 (s, 2H), 2.95 (s, 6H);  $^{13}\text{C}$  NMR (101 MHz,  $\text{CDCl}_3$ )  $\delta$  158.7, 150.2, 142.2, 129.3, 126.6, 126.1, 120.8, 114.9, 112.1, 111.1, 69.9, 40.4. HRMS (ESI)  $m/z$ :  $[\text{M} + \text{H}]^+$  Calcd for  $\text{C}_{17}\text{H}_{20}\text{NO}^+$  254.1539, Found 254.1537.

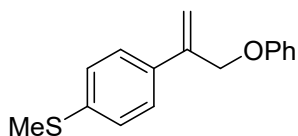

**methyl(4-(3-phenoxyprop-1-en-2-yl)phenyl)sulfane (1f).** White solid was obtained by silica gel column chromatography with PE/EA (50:1). 0.48 g, 1.9 mmol, 38 % yield. M. P. 39.8-40.5 °C.  $^1\text{H}$  NMR (500 MHz,  $\text{CDCl}_3$ )  $\delta$  7.41 (d,  $J = 8.5$  Hz, 2H), 7.26-7.31 (m, 2H), 7.23 (d,  $J = 8.5$  Hz, 2H), 6.93-6.98 (m, 3H), 5.60 (s, 1H), 5.43 (s, 1H), 4.87 (s, 2H), 2.48 (s, 3H);  $^{13}\text{C}$  NMR (101 MHz,  $\text{CDCl}_3$ )  $\delta$  158.5, 142.2, 138.3, 134.9, 129.4, 126.3, 121.0, 114.8, 114.4, 69.7, 15.6; HRMS (ESI)  $m/z$ :  $[\text{M} + \text{H}]^+$  Calcd for  $\text{C}_{16}\text{H}_{17}\text{OS}^+$  257.0995, Found 257.0996.

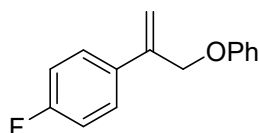

**1-fluoro-4-(3-phenoxyprop-1-en-2-yl)benzene (1g).** Colorless oil was obtained by silica gel column chromatography with PE/EA (50:1). 2.81 g, 12.2 mmol, 82% yield.  $^1\text{H}$  NMR: (500 MHz,  $\text{CDCl}_3$ ):  $\delta$  7.41-7.47 (m, 2H), 7.25-7.32 (m, 2H), 7.00-7.06 (m, 2H), 6.92-6.99 (m, 3H), 5.55 (s, 1H), 5.44 (s, 1H), 4.85 (s, 2H);  $^{13}\text{C}$  NMR (125.8 MHz,  $\text{CDCl}_3$ )  $\delta$  162.6 (d,  $J = 247.0$  Hz), 158.5, 142.2, 134.4 (d,  $J = 3.5$  Hz), 129.5, 127.8 (d,  $J = 8.0$  Hz), 121.1, 115.3 (d,  $J = 20.0$  Hz), 114.9, 69.9;  $^{19}\text{F}$  NMR (376 MHz,  $\text{CDCl}_3$ )  $\delta$  -114.1; HRMS (ESI)  $m/z$ :  $[\text{M} + \text{Na}]^+$  Calcd for  $\text{C}_{15}\text{H}_{13}\text{FNaO}^+$  251.0843, Found 251.0853.

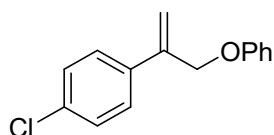

**1-chloro-4-(3-phenoxyprop-1-en-2-yl)benzene (1h).** Colorless oil was obtained by silica gel column chromatography with PE/EA (50:1). 2.04 g, 8.3 mmol, 88% yield. <sup>1</sup>H NMR: (500 MHz, CDCl<sub>3</sub>): δ 7.40 (d, J = 8.5 Hz, 2H), 7.25-7.33 (m, 4H), 6.91-6.99 (m, 3H), 5.59 (s, 1H), 5.47 (s, 1H), 4.84 (s, 2H); <sup>13</sup>C NMR: (125.8 MHz, CDCl<sub>3</sub>) δ 158.5, 142.1, 136.8, 133.8, 129.5, 128.6, 127.4, 121.2, 115.5, 114.9, 69.8; HRMS (ESI) m/z: [M + H]<sup>+</sup> Calcd for C<sub>15</sub>H<sub>14</sub>ClO<sup>+</sup> 245.0728, Found 245.0728.

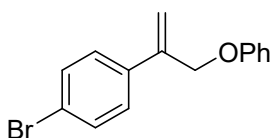

**1-bromo-4-(3-phenoxyprop-1-en-2-yl)benzene (1i).** Colorless oil was obtained by silica gel column chromatography with PE/EA (50:1). 2.71 g, 9.4 mmol, 94% yield. <sup>1</sup>H NMR: (500 MHz, CDCl<sub>3</sub>): δ 7.45 (d, J = 8.0 Hz, 2H), 7.23-7.37 (m, 4H), 6.89-7.00 (m, 3H), 5.58 (s, 1H), 5.47 (s, 1H), 4.83 (s, 2H); <sup>13</sup>C NMR: (125.8 MHz, CDCl<sub>3</sub>) δ 158.5, 142.2, 137.2, 131.6, 129.5, 127.7, 122.0, 121.2, 115.6, 114.9, 69.7; HRMS (ESI) m/z: [M + H]<sup>+</sup> Calcd for C<sub>15</sub>H<sub>14</sub>BrO<sup>+</sup> 289.0223, Found 289.0232.

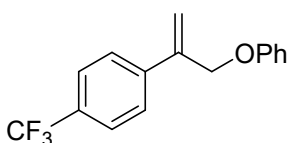

**1-(3-phenoxyprop-1-en-2-yl)-4-(trifluoromethyl)benzene (1j).** Colorless oil was obtained by silica gel column chromatography with PE. 0.29 g, 1.0 mmol, 26 % yield. <sup>1</sup>H NMR: (500 MHz, CDCl<sub>3</sub>): δ 7.54-7.65 (m, 4H), 7.27-7.34 (m, 2H), 6.91-7.02 (m, 3H), 5.69 (s, 1H), 5.58 (s, 1H), 4.90 (s, 2H); <sup>13</sup>C NMR (125.8 MHz, ) δ 158.4, 142.1 (d, J = 46.5 Hz), 130.0 (d, J = 32.5 Hz), 129.5, 126.5, 125.4 (q, J = 3.5 Hz), 125.2, 123.1, 121.3, 117.1, 114.9, 69.7; <sup>19</sup>F NMR (376 MHz, CDCl<sub>3</sub>) δ -62.6; HRMS (ESI) m/z: [M + H]<sup>+</sup> Calcd for C<sub>16</sub>H<sub>14</sub>F<sub>3</sub>O<sup>+</sup> 279.0991, Found 279.0987.

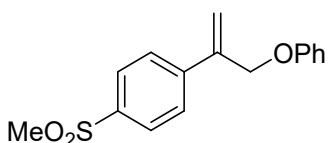

**1-(methylsulfonyl)-4-(3-phenoxyprop-1-en-2-yl)benzene (1k).** White solid was obtained by silica gel column chromatography with PE/EA (5:1). 0.42 g, 1.5 mmol, 48 % yield. M. P. 68.0-68.5 °C. <sup>1</sup>H NMR: (400 MHz, CDCl<sub>3</sub>) δ 7.93 (d, J = 8.4 Hz, 2H), 7.67 (d, J = 8.4 Hz, 2H), 7.28-7.34 (m, 2H), 6.91-7.03 (m, 3H), 5.74 (s, 1H), 5.64 (s, 1H), 4.91 (s, 2H), 3.06 (s, 3H); <sup>13</sup>C NMR (101 MHz, CDCl<sub>3</sub>) δ 158.2, 143.7, 141.8, 139.6, 129.5, 127.5, 127.0, 121.3, 118.4, 114.8, 69.5, 44.4; HRMS (ESI) m/z: [M + H]<sup>+</sup> Calcd for C<sub>16</sub>H<sub>17</sub>O<sub>3</sub>S<sup>+</sup> 289.0893, Found 289.0898.

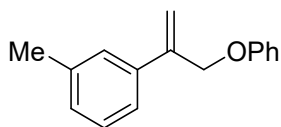

**1-methyl-3-(3-phenoxyprop-1-en-2-yl)benzene (1l).** Colorless oil was obtained by silica gel column chromatography with PE/EA (80:1). 2.34 g, 10.4 mmol, 70% yield.  $^1\text{H NMR}$ : (400 MHz,  $\text{CDCl}_3$ )  $\delta$  7.21 (m, 5H), 7.12 (d,  $J = 6.8$  Hz, 1H), 6.97 (d,  $J = 8.0$  Hz, 3H), 5.58 (s, 1H), 5.44 (s, 1H), 4.87 (s, 2H), 2.36 (s, 3H);  $^{13}\text{C NMR}$  (101 MHz,  $\text{CDCl}_3$ )  $\delta$  158.5, 143.0, 138.2, 137.8, 129.3, 128.6, 128.2, 126.6, 123.0, 120.8, 114.8, 114.2, 69.5, 21.4; HRMS (ESI)  $m/z$ :  $[\text{M} + \text{H}]^+$  Calcd for  $\text{C}_{16}\text{H}_{17}\text{O}^+$  225.1274, Found 225.1278.

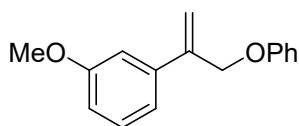

**1-methoxy-3-(3-phenoxyprop-1-en-2-yl)benzene (1m).** Colorless oil was obtained by silica gel column chromatography with PE/EA (80:1). 2.04 g, 9.8 mmol, 66% yield.  $^1\text{H NMR}$ : (500 MHz,  $\text{CDCl}_3$ ):  $\delta$  7.20-7.31 (m, 3H), 6.98-7.08 (m, 2H), 6.96 (m, 3H), 6.85 (d,  $J = 9.0$  Hz, 1H), 5.60 (s, 1H), 5.46 (s, 1H), 4.86 (s, 2H), 3.80 (s, 3H);  $^{13}\text{C NMR}$ : (125.8 MHz,  $\text{CDCl}_3$ )  $\delta$  159.7, 158.6, 139.9, 129.4, 121.0, 118.5, 115.0, 114.9, 113.3, 112.1, 69.8, 55.2; HRMS (ESI)  $m/z$ :  $[\text{M} + \text{Na}]^+$  Calcd for  $\text{C}_{16}\text{H}_{16}\text{NaO}_2^+$  263.1043, Found 263.1045.

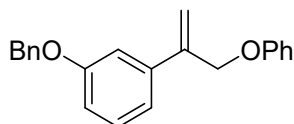

**1-(benzyloxy)-3-(3-phenoxyprop-1-en-2-yl)benzene (1n).** Colorless oil was obtained by silica gel column chromatography with PE/EA (100:1). 0.62 g, 2.0 mmol, 35% yield.  $^1\text{H NMR}$ : (400 MHz,  $\text{CDCl}_3$ )  $\delta$  7.21-7.48 (m, 8H), 7.05-7.15 (m, 2H), 7.02-6.90 (m, 4H), 5.59 (s, 1H), 5.46 (s, 1H), 5.06 (s, 2H), 4.85 (s, 2H);  $^{13}\text{C NMR}$  (101 MHz,  $\text{CDCl}_3$ )  $\delta$  158.7, 158.4, 142.7, 139.8, 136.8, 129.3, 128.5, 127.8, 127.4, 120.9, 118.6, 114.9, 114.8, 114.0, 112.9, 69.8, 69.5; HRMS (ESI)  $m/z$ :  $[\text{M} + \text{H}]^+$  Calcd for  $\text{C}_{22}\text{H}_{21}\text{O}_2^+$  317.1536, Found 317.1532.

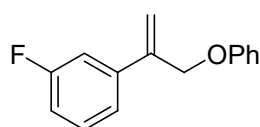

**1-fluoro-3-(3-phenoxyprop-1-en-2-yl)benzene (1o).** Colorless oil was obtained by silica gel column chromatography with PE. 1.02 g, 4.5 mmol, 64% yield.  $^1\text{H NMR}$ : (500 MHz,  $\text{CDCl}_3$ ):  $\delta$  7.21-7.34 (m, 4H), 7.18 (d,  $J = 10.0$  Hz, 1H), 6.90-7.03 (m, 4H), 5.62 (s, 1H), 5.50 (s, 1H), 4.85 (s, 2H);  $^{13}\text{C NMR}$  (125.8 MHz, )  $\delta$  162.9 (d,  $J = 245.5$  Hz), 158.5, 142.2, 140.7 (d,  $J = 7.5$  Hz), 129.9 (d,  $J = 8.5$  Hz), 129.5, 121.7 (d,  $J = 3.5$  Hz), 121.2, 116.0,

115.0, 114.8 (d, J = 21.5 Hz), 113.1 (d, J = 22.5 Hz), 69.8;  $^{19}\text{F}$  NMR (376 MHz,  $\text{CDCl}_3$ )  $\delta$  -113.1; HRMS (ESI) m/z:  $[\text{M} + \text{Na}]^+$  Calcd for  $\text{C}_{15}\text{H}_{13}\text{FNaO}^+$  251.0843, Found 251.0853.

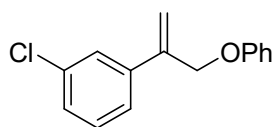

**1-chloro-3-(3-phenoxyprop-1-en-2-yl)benzene (1p).** Colorless oil was obtained by silica gel column chromatography with PE. 0.86 g, 3.5 mmol, 70% yield.  $^1\text{H}$  NMR: (500 MHz,  $\text{CDCl}_3$ ):  $\delta$  7.46 (s, 1H), 7.32-7.37 (s, 1H), 7.26-7.32 (m, 4H), 6.90-7.00 (m, 3H), 5.61 (s, 1H), 5.50 (s, 1H), 4.85 (s, 2H);  $^{13}\text{C}$  NMR: (125.8 MHz,  $\text{CDCl}_3$ )  $\delta$  158.5, 142.2, 140.3, 134.5, 129.7, 129.5, 128.0, 126.3, 124.3, 121.2, 116.1, 115.0, 69.7; HRMS (ESI) m/z:  $[\text{M} + \text{H}]^+$  Calcd for  $\text{C}_{15}\text{H}_{14}\text{ClO}^+$  245.0728, Found 245.0728.

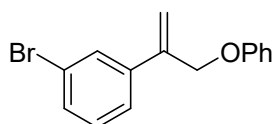

**1-bromo-3-(3-phenoxyprop-1-en-2-yl)benzene (1q).** Colorless oil was obtained by silica gel column chromatography with PE. 0.42 g, 1.5 mmol, 50% yield.  $^1\text{H}$  NMR: (500 MHz,  $\text{CDCl}_3$ ):  $\delta$  7.62 (s, 1H), 7.43 (d, J = 8.0 Hz, 1H), 7.39 (d, J = 8.0 Hz, 1H), 7.25-7.32 (m, 2H), 7.18-7.25 (m, 1H), 6.92-7.00 (m, 3H), 5.60 (s, 1H), 5.50 (s, 1H), 4.84 (s, 2H);  $^{13}\text{C}$  NMR: (125.8 MHz,  $\text{CDCl}_3$ )  $\delta$  158.5, 142.1, 140.6, 130.9, 130.0, 129.5, 129.2, 124.7, 122.7, 121.2, 116.2, 115.0, 69.7; HRMS (ESI) m/z:  $[\text{M} + \text{H}]^+$  Calcd for  $\text{C}_{15}\text{H}_{14}\text{BrO}^+$  289.0223, Found 289.0232.

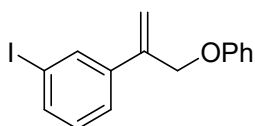

**1-iodo-3-(3-phenoxyprop-1-en-2-yl)benzene (1r).** Orange oil was obtained by silica gel column chromatography with PE/EA (25:1). 0.98 g, 2.9 mmol, 60% yield.  $^1\text{H}$  NMR: (400 MHz,  $\text{CDCl}_3$ )  $\delta$  7.82 (s, 1H), 7.64 (d, J = 8.0 Hz, 1H), 7.42 (d, J = 8.0 Hz, 1H), 7.23-7.33 (m, 2H), 7.04-7.12 (m, 1H), 6.92-7.01 (m, 3H), 5.58 (s, 1H), 5.48 (s, 1H), 4.83 (s, 2H);  $^{13}\text{C}$  NMR (101 MHz,  $\text{CDCl}_3$ )  $\delta$  158.3, 141.8, 140.5, 136.8, 135.0, 130.0, 129.4, 125.2, 121.1, 116.0, 114.8, 94.5, 69.4; HRMS (ESI) m/z:  $[\text{M} + \text{Na}]^+$  Calcd for  $\text{C}_{15}\text{H}_{13}\text{INaO}^+$  358.9903, Found 358.9910.

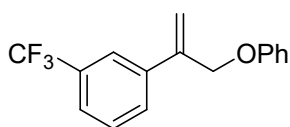

**1-(3-phenoxyprop-1-en-2-yl)-3-(trifluoromethyl)benzene (1s).** Colorless oil was obtained by silica gel column chromatography with PE/EA (50:1). 0.74 g, 2.7 mmol, 53% yield.  $^1\text{H}$  NMR: (500 MHz,  $\text{CDCl}_3$ ):  $\delta$  7.73 (s, 1H),

7.64 (d, J = 8.0 Hz, 1H), 7.56 (d, J = 8.0 Hz, 1H), 7.43-7.49 (m, 1H), 7.25-7.33 (m, 2H), 6.92-7.01 (m, 3H), 5.66 (s, 1H), 5.56 (s, 1H), 4.89 (s, 2H);  $^{13}\text{C}$  NMR (125.8 MHz, )  $\delta$  158.4, 142.2, 139.2, 130.9 (q, J = 31.5 Hz), 129.5, 129.4, 128.9, 125.2, 124.6 (q, J = 3.5 Hz), 122.9 (q, J = 8.0 Hz), 121.3, 116.7, 115.0, 69.8;  $^{19}\text{F}$  NMR (376 MHz,  $\text{CDCl}_3$ )  $\delta$  -62.6; HRMS (ESI) m/z:  $[\text{M} + \text{H}]^+$  Calcd for  $\text{C}_{16}\text{H}_{14}\text{F}_3\text{O}^+$  279.0991, Found 279.0987.

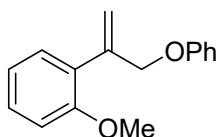

**1-methoxy-2-(3-phenoxyprop-1-en-2-yl)benzene (1t).** Colorless oil was obtained by silica gel column chromatography with PE/EA (50:1). 2.74 g, 11.4 mmol, 57% yield.  $^1\text{H}$  NMR: (400 MHz,  $\text{CDCl}_3$ ):  $\delta$  7.20-7.33 (m, 4H), 6.85-7.00 (m, 5H), 5.50 (s, 1H), 5.27 (s, 1H), 4.87 (s, 2H), 3.81 (s, 3H);  $^{13}\text{C}$  NMR (125.8 MHz,  $\text{CDCl}_3$ )  $\delta$  158.7, 156.8, 143.9, 130.4, 129.2, 129.1, 128.9, 120.7, 120.6, 115.2, 114.9, 110.6, 69.6, 55.4; HRMS (ESI) m/z:  $[\text{M} + \text{H}]^+$  Calcd for  $\text{C}_{16}\text{H}_{17}\text{O}_2^+$  241.1223, Found 241.1221.

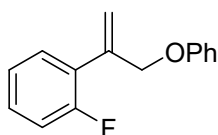

**1-fluoro-2-(3-phenoxyprop-1-en-2-yl)benzene (1u).** Colorless oil was obtained by silica gel column chromatography with PE/EA (80:1). 1.43 g, 6.3 mmol, 70% yield.  $^1\text{H}$  NMR: (500 MHz,  $\text{CDCl}_3$ ):  $\delta$  7.31-7.39 (m, 1H), 7.24-7.30 (m, 3H), 7.03-7.15 (m, 2H), 6.90-7.00 (m, 3H), 5.61 (s, 1H), 5.47 (s, 1H), 4.86 (s, 2H);  $^{13}\text{C}$  NMR (125.8 MHz, )  $\delta$  160.1 (d, J = 247.5 Hz), 158.6, 140.3, 130.2 (d, J = 4.5 Hz), 129.5, 129.4, 126.8 (d, J = 14.5 Hz), 124.2 (d, J = 3.5 Hz), 120.9, 117.5 (d, J = 3.0 Hz), 115.8 (d, J = 22.5 Hz), 114.9, 69.9;  $^{19}\text{F}$  NMR (376 MHz,  $\text{CDCl}_3$ )  $\delta$  -114.5; HRMS (ESI) m/z:  $[\text{M} + \text{Na}]^+$  Calcd for  $\text{C}_{15}\text{H}_{13}\text{FNaO}^+$  251.0843, Found 251.0853.

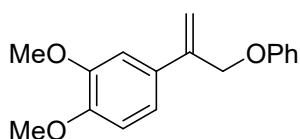

**1,2-dimethoxy-4-(3-phenoxyprop-1-en-2-yl)benzene (1v).** Colorless oil was obtained by silica gel column chromatography with PE/EA (20:1). 2.86 g, 10.5 mmol, 70% yield.  $^1\text{H}$  NMR: (500 MHz,  $\text{CDCl}_3$ ):  $\delta$  7.26-7.32 (m, 2H), 7.01-7.06 (m, 2H), 6.93-6.99 (m, 3H), 6.84 (d, J = 9.0 Hz, 1H), 5.53 (s, 1H), 5.39 (s, 1H), 4.86 (s, 2H), 3.87 (d, J = 2.5 Hz, 6H);  $^{13}\text{C}$  NMR: (125.8 MHz,  $\text{CDCl}_3$ )  $\delta$  158.6, 149.1, 148.9, 142.6, 131.3, 129.4, 121.0, 118.5, 114.9, 113.5, 111.1, 109.6, 70.1, 55.8; HRMS (ESI) m/z:  $[\text{M} + \text{Na}]^+$  Calcd for  $\text{C}_{17}\text{H}_{18}\text{NaO}_3^+$  293.1148, Found 293.1155.



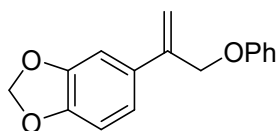

**1-(3-phenoxyprop-1-en-2-yl)benzo[d][1,3]dioxole (1w).** Colorless oil was obtained by silica gel column chromatography with PE/EA (150:1). 0.42 g, 1.7 mmol, 33% yield.  $^1\text{H}$  NMR (400 MHz,  $\text{CDCl}_3$ )  $\delta$  7.22-7.33 (m, 2H), 6.90-7.02 (m, 5H), 6.78 (d,  $J = 8.0$  Hz, 1H), 5.95 (s, 2H), 5.50 (s, 1H), 5.37 (s, 1H), 4.82 (s, 2H);  $^{13}\text{C}$  NMR (101 MHz,  $\text{CDCl}_3$ )  $\delta$  158.5, 147.8, 147.4, 142.5, 132.6, 129.4, 121.0, 119.6, 114.9, 114.0, 108.2, 106.6, 101.1, 70.0; HRMS (ESI)  $m/z$ :  $[\text{M} + \text{H}]^+$  Calcd for  $\text{C}_{16}\text{H}_{15}\text{O}_3^+$  255.1016, Found 255.1024.

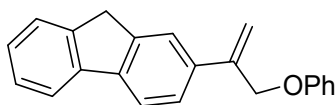

**1-(3-phenoxyprop-1-en-2-yl)-9H-fluorene (1x).** White solid was obtained by silica gel column chromatography with PE/EA (150:1). 0.61 g, 2.0 mmol, 34% yield. M. P. 92.1-92.4 °C.  $^1\text{H}$  NMR (400 MHz,  $\text{CDCl}_3$ ):  $\delta$  7.80-7.73 (m, 2H), 7.67 (s, 1H), 7.53 (dd,  $J = 13.6, 8.0$  Hz, 2H), 7.35-7.41 (m, 1H), 7.28-7.34 (m, 3H), 6.95-7.03 (m, 3H) 5.67 (s, 1H), 5.49 (s, 1H), 4.96 (s, 2H), 3.91 (s, 2H);  $^{13}\text{C}$  NMR (101 MHz,  $\text{CDCl}_3$ )  $\delta$  158.6, 143.4, 143.2, 141.6, 141.2, 136.8, 129.4, 126.8, 125.0, 124.8, 122.6, 121.0, 119.9, 119.7, 114.9, 114.5, 69.9, 36.9; HRMS (ESI)  $m/z$ :  $[\text{M} + \text{H}]^+$  Calcd for  $\text{C}_{22}\text{H}_{19}\text{O}^+$  299.1430, Found 299.1427.

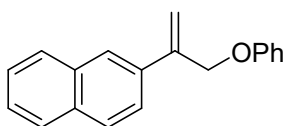

**1-(3-phenoxyprop-1-en-2-yl)naphthalene (1y).** White solid was obtained by silica gel column chromatography with PE/EA (50:1). 1.16 g, 4.4 mmol, 44% yield. M. P. 35.7-36.5 °C.  $^1\text{H}$  NMR: (500 MHz,  $\text{CDCl}_3$ ):  $\delta$  7.89 (s, 1H), 7.76-7.85 (m, 3H), 7.63 (dd,  $J = 8.5, 1.5$  Hz, 1H), 7.41-7.50 (m, 2H), 7.25-7.35 (m, 2H), 6.93-7.04 (m, 3H), 5.75 (s, 1H), 5.56 (s, 1H), 5.00 (s, 2H);  $^{13}\text{C}$  NMR: (125.8 MHz,  $\text{CDCl}_3$ )  $\delta$  158.7, 143.0, 135.6, 133.4, 133.1, 129.5, 128.3, 128.0, 127.6, 126.2, 126.1, 124.9, 124.2, 121.1, 115.3, 115.1, 69.9; HRMS (ESI)  $m/z$ :  $[\text{M} + \text{H}]^+$  Calcd for  $\text{C}_{19}\text{H}_{17}\text{O}^+$  261.1274, Found 261.1277.

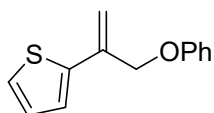

**1-(3-phenoxyprop-1-en-2-yl)thiophene (1z).** Yellow oil was obtained by silica gel column chromatography with PE. 0.91 g, 4.2 mmol, 52% yield.  $^1\text{H}$  NMR: (500 MHz,  $\text{CDCl}_3$ ):  $\delta$  7.24-7.32 (m, 2H), 7.19 (d,  $J = 5.0$  Hz, 1H), 7.12 (d,  $J = 5.0$  Hz, 1H), 6.90-7.01 (m, 4H), 5.62 (s, 1H), 5.34 (s, 1H), 4.84 (s, 2H);  $^{13}\text{C}$  NMR: (125.8 MHz,  $\text{CDCl}_3$ )  $\delta$

158.5, 141.9, 137.0, 129.5, 127.4, 124.7, 124.0, 121.2, 115.0, 113.3, 69.7; HRMS (ESI) m/z: [M + Na]<sup>+</sup> Calcd for C<sub>13</sub>H<sub>12</sub>NaOS<sup>+</sup> 239.0501, Found 239.0507.

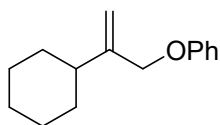

**((2-cyclohexylallyl)oxy)benzene (1aa).** Colorless oil was obtained by silica gel column chromatography with PE. 2.39 g, 11.7 mmol, 74% yield. <sup>1</sup>H NMR: (400 MHz, CDCl<sub>3</sub>) δ 7.23-7.31 (m, 2H), 6.89-6.96 (m, 3H), 5.11 (s, 1H), 4.98 (s, 1H), 4.48 (s, 2H), 2.20-2.12 (m, 1H), 1.75-1.89 (m, 4H), 1.70 (d, J = 12.0 Hz, 1H), 1.15-1.34 (m, 5H); <sup>13</sup>C NMR (126 MHz, CDCl<sub>3</sub>) δ 158.8, 150.0, 129.3, 120.6, 114.7, 110.1, 70.0, 41.2, 32.2, 26.6, 26.2; HRMS (ESI) m/z: [M + Na]<sup>+</sup> Calcd for C<sub>15</sub>H<sub>20</sub>NaO<sup>+</sup> 239.1406, Found 239.1406.

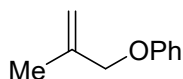

**((2-methylallyl)oxy)benzene (1ab).**<sup>7</sup> Colorless oil was obtained by silica gel column chromatography with PE. 3.75 g, 25.3 mmol, 67% yield. <sup>1</sup>H NMR: (400 MHz, CDCl<sub>3</sub>) δ 7.22-7.31 (m, 2H), 6.89-6.98 (m, 3H), 5.09 (s, 1H), 4.98 (s, 1H), 4.42 (s, 2H), 1.82 (s, 3H).

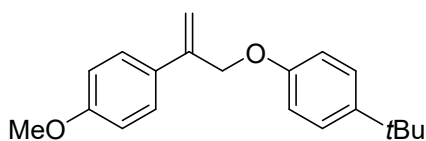

**1-(tert-butyl)-4-((2-(4-methoxyphenyl)allyl)oxy)benzene (1ac).** White solid was obtained by silica gel column chromatography with PE/EA (50:1). 0.30 g, 1.1 mmol, 25% yield. M. P. 62.0-62.5 °C. <sup>1</sup>H NMR: (500 MHz, CDCl<sub>3</sub>): δ NMR (500 MHz, ) δ 7.43 (d, J = 8.8 Hz, 2H), 7.30 (d, J = 8.8 Hz, 2H), 6.85-6.92 (m, 4H), 5.53 (s, 1H), 5.37 (s, 1H), 4.84 (s, 2H), 3.81 (s, 3H), 1.30 (s, 9H); <sup>13</sup>C NMR: (125.8 MHz, CDCl<sub>3</sub>) δ 159.5, 156.5, 143.7, 142.6, 130.9, 127.2, 126.2, 114.4, 113.8, 113.2, 70.2, 55.3, 34.1, 31.5; HRMS (ESI) m/z: [M + H]<sup>+</sup> Calcd for C<sub>20</sub>H<sub>25</sub>O<sub>2</sub><sup>+</sup> 297.1849, Found 297.1851.

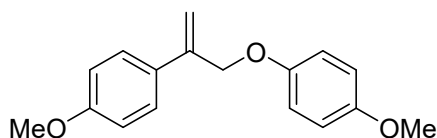

**1-methoxy-4-(3-(4-methoxyphenoxy)prop-1-en-2-yl)benzene (1ad).** White solid was obtained by silica gel column chromatography with PE/EA (50:1). 0.73 g, 2.7 mmol, 45% yield. M. P. 94.7-95.7 °C. <sup>1</sup>H NMR: (500 MHz, CDCl<sub>3</sub>): δ 7.43 (d, J = 9.0 Hz, 2H), 6.80-6.92 (m, 6H), 5.51 (s, 1H), 5.35 (s, 1H), 4.82 (s, 2H), 3.82 (s, 3H), 3.77 (s,

<sup>7</sup> W. Gao, X. Zhang, X. Xie, S. Ding, *Chem. Commun.* **2020**, 56, 2012.

3H);  $^{13}\text{C}$  NMR: (125.8 MHz,  $\text{CDCl}_3$ )  $\delta$  159.5, 154.1, 152.9, 142.7, 130.9, 127.2, 116.1, 114.6, 113.8, 113.2, 70.9, 55.7, 55.3; HRMS (ESI)  $m/z$ :  $[\text{M} + \text{Na}]^+$  Calcd for  $\text{C}_{17}\text{H}_{18}\text{NaO}_3^+$  293.1148, Found 293.1155.

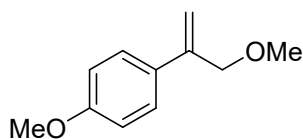

**1-methoxy-4-(3-methoxyprop-1-en-2-yl)benzene (1ae).**<sup>8</sup> Colorless oil was obtained by silica gel column chromatography with PE/EA (50:1). 1.21 g, 6.8 mmol, 72 % yield.  $^1\text{H}$  NMR: (500 MHz,  $\text{CDCl}_3$ ):  $\delta$  7.41 (d,  $J = 9.0$  Hz, 2H), 6.87 (d,  $J = 9.0$  Hz, 2H), 5.44 (s, 1H), 5.23 (s, 1H), 4.29 (s, 2H), 3.80 (s, 3H), 3.36 (s, 3H).

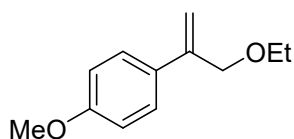

**1-(3-ethoxyprop-1-en-2-yl)-4-methoxybenzene (1af).**<sup>9</sup> Colorless oil was obtained by silica gel column chromatography with PE/EA (200:1). 0.0740 g, 0.41 mmol, 26% yield.  $^1\text{H}$  NMR: (400 MHz,  $\text{CDCl}_3$ ):  $\delta$  7.41 (dd,  $J = 8.8, 2.4$  Hz, 2H), 6.86 (dd,  $J = 8.8, 2.4$  Hz, 2H), 5.43 (s, 1H), 5.24 (s, 1H), 4.33 (s, 2H), 3.80 (s, 3H), 3.49-3.57 (m, 2H), 1.15-1.25 (m, 3H).

### III. Cobalt-catalyzed isomerization of allyl ethers

**General procedure for Co-catalyzed isomerization of allyl ethers:** To a 10 mL flame-dried Schlenk flask cooled under argon,  $\text{CoCl}_2$  (0.025 mmol), **PNP** (0.03 mmol), PhCl (1 mL), alkene **1** (0.5 mmol) and  $\text{NaBHET}_3$  (0.075 mmol, 1 M in THF) were added in sequence. Then the reaction mixture was stirred at rt for 1 h, purified by flash column chromatography using PE/EtOAc as the eluent to give the desired product **2**.

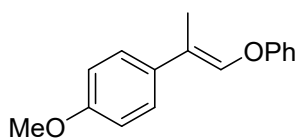

**(E)-1-methoxy-4-(1-phenoxyprop-1-en-2-yl)benzene [(E)-(2a)].** Prepared according to the general procedure using 0.1187 g (0.50 mmol) of **1a**, 0.0161 g (0.03 mmol) of **PNP**, 0.0032 g (0.025 mmol) of  $\text{CoCl}_2$ , 75  $\mu\text{L}$  (0.075 mmol, 1 M in THF) of  $\text{NaBHET}_3$ , 1 mL (0.5 M) of PhCl. Then the mixture was stirred at rt for 1 h (> 99% conv., 10/1 *E/Z*, monitored by  $^1\text{H}$  NMR), purified by flash column chromatography using PE as the eluent to give 0.0973 g (0.40 mmol, 82% yield, >20/1 *E/Z*) of **(E)-2a** as a white solid. M. P. 56.2-56.4  $^\circ\text{C}$ .  $^1\text{H}$  NMR ( $\text{CDCl}_3$ , 500 MHz):  $\delta$

<sup>8</sup> W. Kirmse, J. Rode, *Chem. Ber.* **1986**, *119*, 3694.

<sup>9</sup> J. Gupton, J. Dicesare, J. Brown, J. Idoux, *Syn. Commun.* **1992**, *22*, 1067.

7.29-7.34 (m, 4H), 7.02-7.07 (m, 3H), 6.88 (d,  $J = 9.0$  Hz, 2H), 6.76 (s, 1H), 3.80 (s, 3H), 2.11 (s, 3H);  $^{13}\text{C}$  NMR (125.8 MHz,  $\text{CDCl}_3$ )  $\delta$  158.6, 157.7, 137.8, 132.3, 129.5, 126.5, 122.4, 120.4, 116.2, 113.9, 55.2, 13.2; HRMS (ESI)  $m/z$ :  $[\text{M} + \text{H}]^+$  Calcd for  $\text{C}_{16}\text{H}_{17}\text{O}_2^+$  241.1223, Found 241.1228.

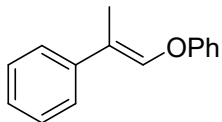

**(E)-(1-phenoxyprop-1-en-2-yl)benzene [(E)-(2b)]**. Prepared according to the general procedure using 0.1040 g (0.50 mmol) of **1b**, 0.0162 g (0.03 mmol) of **PNP**, 0.0031 g (0.025 mmol) of  $\text{CoCl}_2$ , 75  $\mu\text{L}$  (0.075 mmol) of  $\text{NaBHET}_3$ , 1 mL (0.5 M) of  $\text{PhCl}$ . Then the mixture was stirred at rt for 1 h ( $> 99\%$  conv., 10/1  $E/Z$ , monitored by  $^1\text{H}$  NMR), purified by flash column chromatography using PE as the eluent to give 0.0690 g (0.33 mmol, 79% yield,  $>20/1$   $E/Z$ ) of **(E)-2b** as a colorless oil.  $^1\text{H}$  NMR ( $\text{CDCl}_3$ , 500 MHz):  $\delta$  7.40 (d,  $J = 7.5$  Hz, 2H), 7.29-7.36 (m, 4H), 7.21-7.27 (m, 1H), 7.03-7.09 (m, 3H), 6.85 (s, 1H), 2.14 (s, 3H);  $^{13}\text{C}$  NMR: (125.8 MHz,  $\text{CDCl}_3$ )  $\delta$  157.6, 139.9, 139.0, 129.6, 128.5, 126.7, 125.5, 122.7, 120.6, 116.4, 13.0; HRMS (ESI)  $m/z$ :  $[\text{M} + \text{Na}]^+$  Calcd for  $\text{C}_{15}\text{H}_{14}\text{NaO}^+$  233.0937, Found 233.0938.

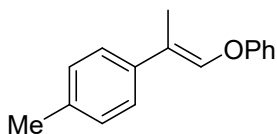

**(E)-1-methyl-4-(1-phenoxyprop-1-en-2-yl)benzene [(E)-(2c)]**. Prepared according to the general procedure using 0.1116 g (0.49 mmol) of **1c**, 0.0163 g (0.03 mmol) of **PNP**, 0.0033 g (0.025 mmol) of  $\text{CoCl}_2$ , 75  $\mu\text{L}$  (0.075 mmol) of  $\text{NaBHET}_3$ , 1 mL (0.5 M) of  $\text{PhCl}$ . Then the mixture was stirred at rt for 1 h ( $> 99\%$  conv., 10/1  $E/Z$ , monitored by  $^1\text{H}$  NMR), purified by flash column chromatography using PE as the eluent to give 0.0889 g (0.39 mmol, 80% yield,  $>20/1$   $E/Z$ ) of **(E)-2c** as a colorless oil.  $^1\text{H}$  NMR ( $\text{CDCl}_3$ , 500 MHz):  $\delta$  7.26-7.35 (m, 4H), 7.14 (d,  $J = 8.0$  Hz, 2H), 7.02-7.08 (m, 3H), 6.81 (s, 1H), 2.34 (s, 3H), 2.12 (s, 3H);  $^{13}\text{C}$  NMR: (125.8 MHz,  $\text{CDCl}_3$ )  $\delta$  157.7, 138.4, 136.9, 136.4, 129.6, 129.1, 125.4, 122.6, 120.6, 116.3, 21.0, 13.1; HRMS (ESI)  $m/z$ :  $[\text{M} + \text{Na}]^+$  Calcd for  $\text{C}_{16}\text{H}_{16}\text{NaO}^+$  247.1093, Found 247.1089.

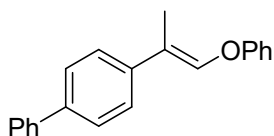

**(E)-4-(1-phenoxyprop-1-en-2-yl)-1,1'-biphenyl [(E)-(2d)]**. Prepared according to the general procedure using 0.1418 g (0.49 mmol) of **1d**, 0.0164 g (0.031 mmol) of **PNP**, 0.0034 g (0.026 mmol) of  $\text{CoCl}_2$ , 75  $\mu\text{L}$  (0.075 mmol)

of NaBHET<sub>3</sub>, 1 mL (0.5 M) of PhCl. Then the mixture was stirred at rt for 1 h (> 99% conv., 10/1 *E/Z*, monitored by <sup>1</sup>H NMR), purified by flash column chromatography using PE as the eluent to give 0.1168 g (0.41 mmol, 82% yield, >20/1 *E/Z*) of **(E)-2d** as a white solid. M. P. 122.5-122.7 °C. <sup>1</sup>H NMR (CDCl<sub>3</sub>, 500 MHz): δ 7.55-7.63 (m, 4H), 7.41-7.51 (m, 4H), 7.31-7.37 (m, 3H), 7.05-7.11 (m, 3H), 6.93 (s, 1H), 2.18 (s, 3H); <sup>13</sup>C NMR: (125.8 MHz, CDCl<sub>3</sub>) δ 157.6, 140.7, 139.5, 139.1, 138.8, 129.6, 128.8, 127.2, 127.1, 126.9, 125.8, 122.7, 120.1, 116.4, 12.9; HRMS (ESI) m/z: [M + H]<sup>+</sup> Calcd for C<sub>21</sub>H<sub>19</sub>O<sup>+</sup> 287.1430, Found 287.1434.

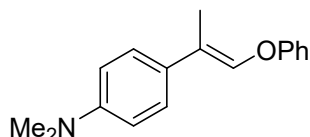

**(E)-N, N-dimethyl-4-(1-phenoxyprop-1-en-2-yl)aniline [(E)-2e]**. Prepared according to the general procedure using 0.0746 g (0.29 mmol) of **1e**, 0.0194 g (0.036 mmol) of **PNP**, 0.0042 g (0.03 mmol) of CoCl<sub>2</sub>, 90 μL (0.090 mmol) of NaBHET<sub>3</sub>, 1 mL (0.5 M) of PhCl. Then the mixture was stirred at rt for 1 h (> 99% conv., 10/1 *E/Z*, monitored by <sup>1</sup>H NMR), purified by flash column chromatography using PE as the eluent to give 0.0605 g (0.24 mmol, 81% yield, >20/1 *E/Z*) of **(E)-2e** as a white solid. M. P. 75.6-77.3 °C. <sup>1</sup>H NMR: (400 MHz, CDCl<sub>3</sub>) δ 7.27-7.35 (m, 4H), 7.00-7.10 (m, 3H), 6.70-6.77 (m, 3H), 2.95 (s, 6H), 2.10 (s, 3H); <sup>13</sup>C NMR (101 MHz, CDCl<sub>3</sub>) δ 157.7, 136.7, 129.5, 126.2, 122.2, 120.9, 116.1, 112.7, 40.7, 13.0; HRMS (ESI) m/z: [M + H]<sup>+</sup> Calcd for C<sub>17</sub>H<sub>20</sub>NO<sup>+</sup> 254.1539, Found 254.1537.

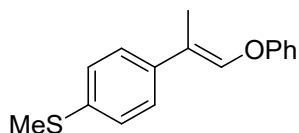

**(E)-methyl(4-(1-phenoxyprop-1-en-2-yl)phenyl)sulfane [(E)-2f]**. Prepared according to the general procedure using 0.1237 g (0.48 mmol) of **1f**, 0.0160 g (0.03 mmol) of **PNP**, 0.0034 g (0.026 mmol) of CoCl<sub>2</sub>, 75 μL (0.075 mmol) of NaBHET<sub>3</sub>, 1 mL (0.5 M) of PhCl. Then the mixture was stirred at rt for 1 h (> 99% conv., 14/1 *E/Z*, monitored by <sup>1</sup>H NMR), purified by flash column chromatography using PE as the eluent to give 0.1194 g (0.46 mmol, 95% yield, >20/1 *E/Z*) of **(E)-2f** as a white solid. M. P. 47.2-48.6 °C. <sup>1</sup>H NMR: (400 MHz, CDCl<sub>3</sub>) δ 7.30-7.35 (m, 3H), 7.22-7.27 (m, 3H), 7.03-7.10 (m, 3H), 6.84 (s, 1H), 2.49 (s, 3H), 2.12 (s, 3H); <sup>13</sup>C NMR (101 MHz, CDCl<sub>3</sub>) δ 157.5, 138.7, 136.7, 136.5, 129.6, 128.1, 126.9, 125.8, 122.7, 119.9, 116.3, 16.1, 12.9; HRMS (ESI) m/z: [M + H]<sup>+</sup> Calcd for C<sub>16</sub>H<sub>17</sub>OS<sup>+</sup> 257.0995, Found 257.0997.

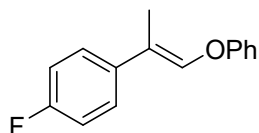

**(E)-1-fluoro-4-(1-phenoxyprop-1-en-2-yl)benzene [(E)-(2g)]**. Prepared according to the general procedure using 0.1139 g (0.50 mmol) of **1g**, 0.0161 g (0.03 mmol) of **PNP**, 0.0032 g (0.025 mmol) of  $\text{CoCl}_2$ , 75  $\mu\text{L}$  (0.075 mmol) of  $\text{NaBHET}_3$ , 1 mL (0.5 M) of  $\text{PhCl}$ . Then the mixture was stirred at rt for 1 h (> 99% conv., 5/1 *E/Z*, monitored by  $^1\text{H}$  NMR), purified by flash column chromatography using PE as the eluent to give 0.0917 g (0.40 mmol, 81% yield, >20/1 *E/Z*) of **(E)-2g** as a colorless oil.  $^1\text{H}$  NMR ( $\text{CDCl}_3$ , 500 MHz):  $\delta$  7.29-7.37 (m, 4H), 6.98-7.10 (m, 5H), 6.77 (s, 1H), 2.12 (s, 3H);  $^{13}\text{C}$  NMR (125.8 MHz, )  $\delta$  161.9 (d,  $J = 245.5$  Hz), 157.6, 138.8, 135.9 (d,  $J = 3.5$  Hz), 129.7, 126.9 (d,  $J = 7.5$  Hz), 122.8, 119.7, 116.4, 115.3 (d,  $J = 21.0$  Hz), 13.3;  $^{19}\text{F}$  NMR (376 MHz,  $\text{CDCl}_3$ )  $\delta$  -116.1; HRMS (ESI)  $m/z$ :  $[\text{M} + \text{H}]^+$  Calcd for  $\text{C}_{15}\text{H}_{14}\text{FO}^+$  229.1023, Found 229.1021.

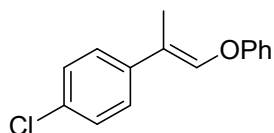

**(E)-1-chloro-4-(1-phenoxyprop-1-en-2-yl)benzene [(E)-(2h)]**. Prepared according to the general procedure using 0.1223 g (0.50 mmol) of **1h**, 0.0161 g (0.03 mmol) of **PNP**, 0.0032 g (0.025 mmol) of  $\text{CoCl}_2$ , 75  $\mu\text{L}$  (0.075 mmol) of  $\text{NaBHET}_3$ , 1 mL (0.5 M) of  $\text{PhCl}$ . Then the mixture was stirred at rt for 1 h (> 99% conv., 6/1 *E/Z*, monitored by  $^1\text{H}$  NMR), purified by flash column chromatography using PE as the eluent to give 0.0974 g (0.40 mmol, 82% yield, >20/1 *E/Z*) of **(E)-2h** as a colorless oil.  $^1\text{H}$  NMR ( $\text{CDCl}_3$ , 500 MHz):  $\delta$  7.26-7.36 (m, 6H), 7.01-7.10 (m, 3H), 6.83 (s, 1H), 2.11 (s, 3H);  $^{13}\text{C}$  NMR: (125.8 MHz,  $\text{CDCl}_3$ )  $\delta$  157.5, 139.4, 138.3, 132.3, 129.6, 128.5, 126.6, 122.8, 119.3, 116.4, 12.9; HRMS (ESI)  $m/z$ :  $[\text{M} + \text{H}]^+$  Calcd for  $\text{C}_{15}\text{H}_{14}\text{ClO}^+$  245.0728, Found 245.0728.

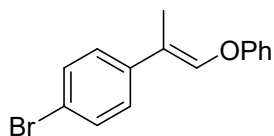

**(E)-1-bromo-4-(1-phenoxyprop-1-en-2-yl)benzene [(E)-(2i)]**. Prepared according to the general procedure using 0.1449 g (0.50 mmol) of **1i**, 0.0162 g (0.03 mmol) of **PNP**, 0.0033 g (0.025 mmol) of  $\text{CoCl}_2$ , 75  $\mu\text{L}$  (0.075 mmol) of  $\text{NaBHET}_3$ , 1 mL (0.5 M) of  $\text{PhCl}$ . Then the mixture was stirred at rt for 1 h (> 99% conv., 6/1 *E/Z*, monitored by  $^1\text{H}$  NMR), purified by flash column chromatography using PE as the eluent to give 0.1115 g (0.38 mmol, 81% yield, >20/1 *E/Z*) of **(E)-2i** as a colorless oil.  $^1\text{H}$  NMR ( $\text{CDCl}_3$ , 500 MHz):  $\delta$  7.44 (d,  $J = 8.5$  Hz, 2H), 7.30-7.36 (m, 2H), 7.25 (d,  $J = 8.5$  Hz, 2H), 7.02-7.11 (m, 3H), 6.84 (s, 1H), 2.12 (s, 3H);  $^{13}\text{C}$  NMR: (125.8 MHz,  $\text{CDCl}_3$ )  $\delta$  157.5,

139.4, 138.8, 131.5, 129.7, 127.0, 122.9, 120.4, 119.4, 116.4, 12.9; HRMS (ESI)  $m/z$ :  $[M + Na]^+$  Calcd for  $C_{15}H_{13}BrNaO^+$  311.0042, Found 311.0048.

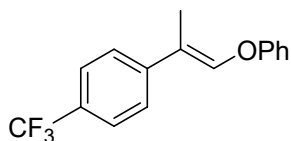

**(E)-1-(1-phenoxyprop-1-en-2-yl)-4-(trifluoromethyl)benzene [(E)-(2j)]**. Prepared according to the general procedure using 0.1333 g (0.50 mmol) of **1j**, 0.0161 g (0.03 mmol) of **PNP**, 0.0032 g (0.025 mmol) of  $CoCl_2$ , 75  $\mu L$  (0.075 mmol) of  $NaBH_4Et_3$ , 1 mL (0.5 M) of  $PhCl$ . Then the mixture was stirred at rt for 1 h ( $> 99\%$  conv., 8/1 *E/Z*, monitored by  $^1H$  NMR), purified by flash column chromatography using PE as the eluent to give 0.1138 g (0.41 mmol, 85% yield,  $>20/1$  *E/Z*) of **(E)-2j** as a colorless oil.  $^1H$  NMR: (500 MHz,  $CDCl_3$ )  $\delta$  7.57 (d,  $J = 8.0$  Hz, 2H), 7.48 (d,  $J = 8.0$  Hz, 2H), 7.31-7.37 (m, 2H), 7.03-7.12 (m, 3H), 6.94 (s, 1H), 2.16 (s, 3H);  $^{13}C$  NMR (125.8 MHz, )  $\delta$  157.4, 143.6, 140.7, 129.7, 128.6 (q,  $J = 32.5$  Hz), 127.9, 125.5, 125.4 (q,  $J = 3.5$  Hz), 123.1, 119.0, 116.6, 12.8;  $^{19}F$  NMR (376 MHz,  $CDCl_3$ )  $\delta$  -62.3; HRMS (ESI)  $m/z$ :  $[M + H]^+$  Calcd for  $C_{16}H_{14}F_3O^+$  279.0991, Found 279.1001.

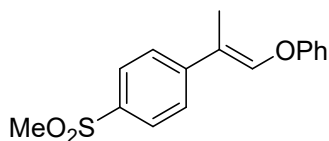

**(E)-1-(methylsulfonyl)-4-(1-phenoxyprop-1-en-2-yl)benzene [(E)-(2k)]**. Prepared according to the general procedure using 0.0860 g (0.30 mmol) of **1k**, 0.0194 g (0.036 mmol) of **PNP**, 0.0040 g (0.03 mmol) of  $CoCl_2$ , 90  $\mu L$  (0.090 mmol) of  $NaBH_4Et_3$ , 1 mL (0.5 M) of  $PhCl$ . Then the mixture was stirred at rt for 1 h ( $> 99\%$  conv., 14/1 *E/Z*, monitored by  $^1H$  NMR), purified by flash column chromatography using PE as the eluent to give 0.0767 g (0.27 mmol, 89% yield,  $>20/1$  *E/Z*) of **(E)-2k** as a white solid. M. P. 88.4-90.0  $^{\circ}C$ .  $^1H$  NMR: (400 MHz,  $CDCl_3$ )  $\delta$  7.89 (d,  $J = 8.4$  Hz, 2H), 7.56 (d,  $J = 8.4$  Hz, 2H), 7.33-7.40 (m, 2H), 7.04-7.15 (m, 3H), 7.10 (s, 1H), 3.05 (s, 3H), 2.18 (s, 3H);  $^{13}C$  NMR (101 MHz,  $CDCl_3$ )  $\delta$  157.2, 145.6, 141.8, 138.1, 129.7, 127.6, 125.8, 123.4, 118.2, 116.6, 44.6, 12.7; HRMS (ESI)  $m/z$ :  $[M + H]^+$  Calcd for  $C_{16}H_{17}O_3S^+$  289.0893, Found 289.0893.

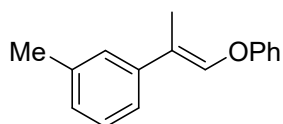

**(E)-1-methyl-3-(1-phenoxyprop-1-en-2-yl)benzene [(E)-(2l)]**. Prepared according to the general procedure using 0.1105 g (0.49 mmol) of **1l**, 0.0162 g (0.03 mmol) of **PNP**, 0.0035 g (0.027 mmol) of  $CoCl_2$ , 75  $\mu L$  (0.075 mmol)

of NaBHET<sub>3</sub>, 1 mL (0.5 M) of PhCl. Then the mixture was stirred at rt for 1 h (> 99% conv., 14/1 *E/Z*, monitored by <sup>1</sup>H NMR), purified by flash column chromatography using PE as the eluent to give 0.1013 g (0.45 mmol, 92% yield, >20/1 *E/Z*) of (**E**)-**2l** as a colorless oil. <sup>1</sup>H NMR: (400 MHz, CDCl<sub>3</sub>) δ 7.28-7.37 (m, 2H), 7.17-7.26 (m, 3H), 7.02-7.11 (m, 4H), 6.83 (s, 1H), 2.36 (s, 3H), 2.13 (s, 3H); <sup>13</sup>C NMR (100 MHz, CDCl<sub>3</sub>) δ 157.6, 139.8, 138.8, 138.0, 129.6, 128.4, 127.5, 126.3, 122.6, 120.7, 116.3, 21.5, 13.1; HRMS (ESI) m/z: [M + Na]<sup>+</sup> Calcd for C<sub>16</sub>H<sub>16</sub>NaO<sup>+</sup> 247.1093, Found 247.1097.

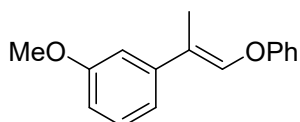

(**E**)-1-methoxy-3-(1-phenoxyprop-1-en-2-yl)benzene [(**E**)-(**2m**)]. Prepared according to the general procedure using 0.1210 g (0.50 mmol) of **1m**, 0.0161 g (0.03 mmol) of **PNP**, 0.0030 g (0.024 mmol) of CoCl<sub>2</sub>, 75 μL (0.075 mmol) of NaBHET<sub>3</sub>, 1 mL (0.5 M) of PhCl. Then the mixture was stirred at rt for 1 h (> 99% conv., 14/1 *E/Z*, monitored by <sup>1</sup>H NMR), purified by flash column chromatography using PE as the eluent to give 0.0946 g (0.39 mmol, 86% yield, >20/1 *E/Z*) of (**E**)-**2m** as a colorless oil. <sup>1</sup>H NMR (CDCl<sub>3</sub>, 500 MHz): δ 7.18-7.25 (m, 2H), 7.11-7.18 (m, 1H), 6.95 (m, 3H), 6.89 (d, J = 7.5 Hz, 1H), 6.84 (s, 1H), 6.77 (s, 1H), 6.70 (d, J = 8.5 Hz, 1H), 3.71 (s, 3H), 2.04 (s, 3H); <sup>13</sup>C NMR: (125.8 MHz, CDCl<sub>3</sub>) δ 159.8, 157.6, 141.4, 139.2, 129.6, 129.4, 122.7, 120.4, 118.1, 116.4, 111.9, 111.6, 55.2, 13.1; HRMS (ESI) m/z: [M + H]<sup>+</sup> Calcd for C<sub>16</sub>H<sub>17</sub>O<sub>2</sub><sup>+</sup> 241.1223, Found 241.1228.

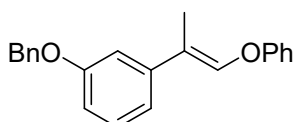

(**E**)-1-(benzyloxy)-3-(1-phenoxyprop-1-en-2-yl)benzene [(**E**)-(**2n**)]. Prepared according to the general procedure using 0.1446 g (0.46 mmol) of **1n**, 0.0160 g (0.03 mmol) of **PNP**, 0.0034 g (0.026 mmol) of CoCl<sub>2</sub>, 75 μL (0.075 mmol) of NaBHET<sub>3</sub>, 1 mL (0.5 M) of PhCl. Then the mixture was stirred at rt for 1 h (> 99% conv., 13/1 *E/Z*, monitored by <sup>1</sup>H NMR), purified by flash column chromatography using PE as the eluent to give 0.1356 g (0.43 mmol, 93% yield, >20/1 *E/Z*) of (**E**)-**2n** as a yellow oil. <sup>1</sup>H NMR: (400 MHz, CDCl<sub>3</sub>) δ 7.44 (d, J = 7.2 Hz, 2H), 7.35-7.41 (m, 2H), 7.28-7.35 (m, 3H), 7.20-7.26 (m, 1H), 6.99-7.07 (m, 5H), 6.87 (d, J = 7.2 Hz, 2H), 5.07 (s, 2H), 2.12 (s, 3H); <sup>13</sup>C NMR (101 MHz, CDCl<sub>3</sub>) δ 158.9, 157.5, 141.3, 139.2, 137.0, 129.6, 129.4, 128.5, 127.9, 127.5, 122.7, 120.2, 118.2, 116.3, 112.6, 112.5, 70.0, 13.0; HRMS (ESI) m/z: [M + H]<sup>+</sup> Calcd for C<sub>22</sub>H<sub>21</sub>O<sub>2</sub><sup>+</sup> 317.1536, Found 317.1537.



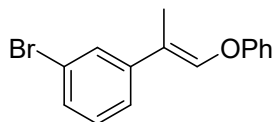

**(E)-1-bromo-3-(1-phenoxyprop-1-en-2-yl)benzene [(E)-(2o)]**. Prepared according to the general procedure using 0.1434 g (0.50 mmol) of **1q**, 0.0161 g (0.03 mmol) of **PNP**, 0.0032 g (0.025 mmol) of  $\text{CoCl}_2$ , 75  $\mu\text{L}$  (0.075 mmol) of  $\text{NaBHET}_3$ , 1 mL (0.5 M) of  $\text{PhCl}$ . Then the mixture was stirred at rt for 1 h (> 99% conv., 11/1 *E/Z*, monitored by  $^1\text{H}$  NMR, >20/1 *E/Z*), purified by flash column chromatography using PE as the eluent to give 0.1062 g (0.37 mmol, 83% yield) of **(E)-2o** as a colorless oil.  $^1\text{H}$  NMR ( $\text{CDCl}_3$ , 500 MHz):  $\delta$  7.52 (s, 1H), 7.27-7.38 (m, 4H), 7.14-7.20 (m, 1H), 7.01-7.10 (m, 3H), 6.85 (s, 1H), 2.11 (s, 3H);  $^{13}\text{C}$  NMR: (125.8 MHz,  $\text{CDCl}_3$ )  $\delta$  157.4, 142.1, 140.0, 129.9, 129.7, 129.5, 128.5, 124.0, 123.0, 122.7, 119.0, 116.5, 12.9; HRMS (ESI) *m/z*:  $[\text{M} + \text{Na}]^+$  Calcd for  $\text{C}_{15}\text{H}_{13}\text{BrNaO}^+$  311.0042, Found 311.0048.

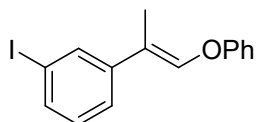

**(E)-1-iodo-3-(1-phenoxyprop-1-en-2-yl)benzene [(E)-(2p)]**. Prepared according to the general procedure using 0.1022 g (0.30 mmol) of **1r**, 0.0098 g (0.018 mmol) of **PNP**, 0.0020 g (0.015 mmol) of  $\text{CoCl}_2$ , 45  $\mu\text{L}$  (0.045 mmol) of  $\text{NaBHET}_3$ , 1 mL (0.5 M) of  $\text{PhCl}$ . Then the mixture was stirred at rt for 1 h (> 99% conv., 10/1 *E/Z*, monitored by  $^1\text{H}$  NMR), purified by flash column chromatography using PE as the eluent to give 0.0903 g (0.27 mmol, 88% yield, >20/1 *E/Z*) of **(E)-2p** as a yellow oil.  $^1\text{H}$  NMR: (400 MHz,  $\text{CDCl}_3$ )  $\delta$  7.72 (s, 1H), 7.57 (d,  $J = 8.0$  Hz, 1H), 7.30-7.37 (m, 3H), 7.04-7.11 (m, 4H), 6.83 (s, 1H), 2.10 (s, 3H);  $^{13}\text{C}$  NMR (100 MHz,  $\text{CDCl}_3$ )  $\delta$  157.4, 142.2, 139.9, 135.5, 134.4, 130.1, 129.7, 124.6, 122.9, 118.9, 116.5, 94.7, 12.9; HRMS (ESI) *m/z*:  $[\text{M} + \text{Na}]^+$  Calcd for  $\text{C}_{15}\text{H}_{13}\text{NaIO}^+$  358.9903, Found 358.9910.

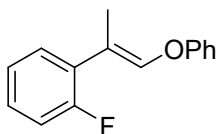

**(E)-1-fluoro-2-(1-phenoxyprop-1-en-2-yl)benzene [(E)-(2q)]**. Prepared according to the general procedure using 0.1163 g (0.49 mmol) of **1u**, 0.0164 g (0.031 mmol) of **PNP**, 0.0034 g (0.026 mmol) of  $\text{CoCl}_2$ , 75  $\mu\text{L}$  (0.075 mmol) of  $\text{NaBHET}_3$ , 1 mL (0.5 M) of  $\text{PhCl}$ . Then the mixture was stirred at rt for 1 h (> 99% conv., 11/1 *E/Z*, monitored by  $^1\text{H}$  NMR), purified by flash column chromatography using PE as the eluent to give 0.0411 g (0.18 mmol, 57% yield, >20/1 *E/Z*) of **(E)-2q** as a colorless oil.  $^1\text{H}$  NMR ( $\text{CDCl}_3$ , 500 MHz):  $\delta$  7.29-7.36 (m, 3H), 7.18-7.24 (m, 1H), 7.03-

7.14 (m, 5H), 6.83 (s, 1H), 2.13 (s, 3H);  $^{13}\text{C}$  NMR (125.8 MHz, )  $\delta$  160.4 (d,  $J = 247.5$  Hz), 157.5, 141.5 (d,  $J = 6.5$  Hz), 129.6, 129.4 (d,  $J = 4.5$  Hz), 128.0 (d,  $J = 8.5$  Hz), 127.8 (d,  $J = 13.5$  Hz), 124.1 (d,  $J = 3.5$  Hz), 122.7, 116.4, 115.9 (d,  $J = 23.5$  Hz), 115.7, 13.8;  $^{19}\text{F}$  NMR (376 MHz,  $\text{CDCl}_3$ )  $\delta$  -114.5; HRMS (ESI)  $m/z$ :  $[\text{M} + \text{H}]^+$  Calcd for  $\text{C}_{15}\text{H}_{14}\text{FO}^+$  229.1023, Found 229.1021.

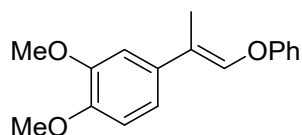

**(E)-1,2-dimethoxy-4-(1-phenoxyprop-1-en-2-yl)benzene [(E)-(2r)]**. Prepared according to the general procedure using 0.1319 g (0.5 mmol) of **1v**, 0.0164 g (0.031 mmol) of **PNP**, 0.0034 g (0.026 mmol) of  $\text{CoCl}_2$ , 75  $\mu\text{L}$  (0.075 mmol) of  $\text{NaBHET}_3$ , 1 mL (0.5 M) of  $\text{PhCl}$ . Then the mixture was stirred at rt for 1 h ( $> 99\%$  conv., 10/1 *E/Z*, monitored by  $^1\text{H}$  NMR), purified by flash column chromatography using PE as the eluent to give 0.1152 g (0.43 mmol, 87% yield, 10/1 *E/Z*) of **(E)-2r** as a colorless oil.  $^1\text{H}$  NMR: (500 MHz,  $\text{CDCl}_3$ )  $\delta$  7.29-7.34 (m, 2H), 7.02-7.08 (m, 3H), 6.90-6.96 (m, 2H), 6.84 (d,  $J = 8.0$  Hz, 1H), 6.77 (s, 1H), 3.89 (s, 3H), 3.87 (s, 3H), 2.12 (s, 3H);  $^{13}\text{C}$  NMR: (125.8 MHz,  $\text{CDCl}_3$ )  $\delta$  157.6, 148.9, 148.2, 138.1, 132.8, 129.6, 122.5, 120.5, 117.9, 116.3, 111.4, 109.2, 55.91, 55.86, 13.3; HRMS (ESI)  $m/z$ :  $[\text{M} + \text{Na}]^+$  Calcd for  $\text{C}_{17}\text{H}_{18}\text{NaO}_3^+$  293.1148, Found 293.1155.

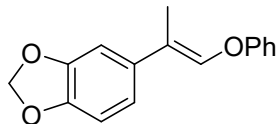

**(E)-5-(1-phenoxyprop-1-en-2-yl)benzo[d][1,3]dioxole [(E)-(2s)]**. Prepared according to the general procedure using 0.0756 g (0.30 mmol) of **1w**, 0.0098 g (0.018 mmol) of **PNP**, 0.0020 g (0.015 mmol) of  $\text{CoCl}_2$ , 45  $\mu\text{L}$  (0.045 mmol) of  $\text{NaBHET}_3$ , 1 mL (0.5 M) of  $\text{PhCl}$ . Then the mixture was stirred at rt for 1 h ( $> 99\%$  conv., 11/1 *E/Z*, monitored by  $^1\text{H}$  NMR), purified by flash column chromatography using PE as the eluent to give 0.0597 g (0.24 mmol, 80% yield,  $>20/1$  *E/Z*) of **(E)-2s** as a yellow oil.  $^1\text{H}$  NMR: (400 MHz,  $\text{CDCl}_3$ )  $\delta$  7.19-7.27 (m, 2H), 6.93-7.00 (m, 3H), 6.74-6.82 (m, 2H), 6.65-6.72 (m, 2H), 5.95 (s, 2H), 2.09 (s, 3H);  $^{13}\text{C}$  NMR (101 MHz,  $\text{CDCl}_3$ )  $\delta$  157.6, 147.8, 146.5, 138.2, 134.1, 129.6, 122.6, 120.5, 118.9, 116.3, 108.2, 106.1, 101.0, 29.7, 13.4; HRMS (ESI)  $m/z$ :  $[\text{M} + \text{H}]^+$  Calcd for  $\text{C}_{16}\text{H}_{15}\text{O}_3^+$  255.1016, Found 255.1016.

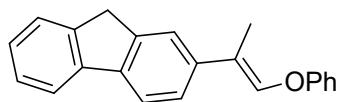

**(E)-2-(1-phenoxyprop-1-en-2-yl)-9H-fluorene [(E)-(2t)]**. Prepared according to the general procedure using 0.0891 g (0.30 mmol) of **1x**, 0.0098 g (0.018 mmol) of **PNP**, 0.0020 g (0.015 mmol) of  $\text{CoCl}_2$ , 45  $\mu\text{L}$  (0.045 mmol)

of NaBH<sub>4</sub>Et<sub>3</sub>, 1 mL (0.5 M) of PhCl. Then the mixture was stirred at rt for 1 h (> 99% conv., 10/1 *E/Z*, monitored by <sup>1</sup>H NMR), purified by flash column chromatography using PE as the eluent to give 0.0853 g (0.28 mmol, 87% yield, >20/1 *E/Z*) of (**E**)-**2t** as a yellow oil. M. P. 109.1-109.5 °C. <sup>1</sup>H NMR: (400 MHz, CDCl<sub>3</sub>) δ 7.72-7.79 (m, 2H), 7.59 (s, 1H), 7.54 (d, J = 7.6 Hz, 1H), 7.43 (d, J = 8.4 Hz, 1H), 7.29-7.39 (m, 4H), 7.09 (d, J = 8.4 Hz, 3H), 6.93 (s, 1H), 3.91 (s, 2H), 2.20 (s, 3H); <sup>13</sup>C NMR (101 MHz, CDCl<sub>3</sub>) δ 157.6, 143.5, 143.2, 141.5, 140.4, 138.8, 138.4, 129.6, 126.7, 126.5, 125.0, 124.2, 122.6, 122.0, 120.8, 119.7, 116.6, 116.3, 36.9, 13.2; HRMS (ESI) m/z: [M + H]<sup>+</sup> Calcd for C<sub>22</sub>H<sub>19</sub>O<sup>+</sup> 299.1430, Found 244.1426.

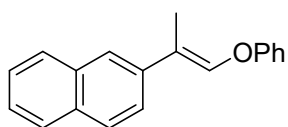

(**E**)-**2-(1-phenoxyprop-1-en-2-yl)naphthalene [(E)-(2u)]**. Prepared according to the general procedure using 0.1292 g (0.50 mmol) of **1y**, 0.0161 g (0.03 mmol) of PNP, 0.0032 g (0.025 mmol) of CoCl<sub>2</sub>, 75 μL (0.075 mmol) of NaBH<sub>4</sub>Et<sub>3</sub>, 1 mL (0.5 M) of PhCl. Then the mixture was stirred at 60 °C for 12 h (> 99% conv., 5/1 *E/Z*, monitored by <sup>1</sup>H NMR), purified by flash column chromatography using PE as the eluent to give 0.0759 g (0.30 mmol, 60% yield, >20/1 *E/Z*) of (**E**)-**2u** as a white solid. M. P. 66.8-66.9 °C. <sup>1</sup>H NMR: (500 MHz, CDCl<sub>3</sub>) δ 7.74-7.84 (m, 4H), 7.55 (d, J = 8.5 Hz, 1H), 7.39-7.48 (m, 2H), 7.29-7.37 (m, 2H), 7.04-7.11 (m, 3H), 7.01 (s, 1H), 2.25 (s, 3H); <sup>13</sup>C NMR: (125.8 MHz, CDCl<sub>3</sub>) δ 157.7, 139.7, 137.1, 133.7, 132.4, 129.7, 127.91, 127.90, 127.5, 126.2, 125.5, 123.9, 122.8, 120.3, 116.5, 13.0; HRMS (ESI) m/z: [M + H]<sup>+</sup> Calcd for C<sub>19</sub>H<sub>17</sub>O<sup>+</sup> 261.1274, Found 261.1284.

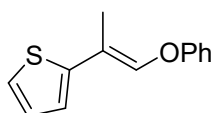

(**E**)-**2-(1-phenoxyprop-1-en-2-yl)thiophene [(E)-(2v)]**. Prepared according to the general procedure using 0.1081 g (0.50 mmol) of **1z**, 0.0164 g (0.031 mmol) of PNP, 0.0034 g (0.026 mmol) of CoCl<sub>2</sub>, 75 μL (0.075 mmol) of NaBH<sub>4</sub>Et<sub>3</sub>, 1 mL (0.5 M) of PhCl. Then the mixture was stirred at 60 °C for 12 h (> 99% conv., 6/1 *E/Z*, monitored by <sup>1</sup>H NMR), purified by flash column chromatography using PE as the eluent to give 0.0696 g (0.32 mmol, 64% yield, >20/1 *E/Z*) of (**E**)-**2v** as a yellow oil. <sup>1</sup>H NMR: (500 MHz, CDCl<sub>3</sub>) δ 7.30-7.37 (m, 2H), 7.03-7.11 (m, 4H), 6.99 (s, 3H), 2.15 (s, 3H); <sup>13</sup>C NMR: (125.8 MHz, CDCl<sub>3</sub>) δ 157.4, 143.4, 138.3, 129.7, 127.2, 122.9, 122.3, 122.3, 116.5, 115.6, 13.5; HRMS (ESI) m/z: [M + H]<sup>+</sup> Calcd for C<sub>13</sub>H<sub>13</sub>OS<sup>+</sup> 217.0682, Found 217.0678.

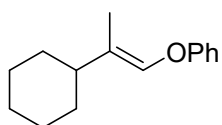

**((2-cyclohexylprop-1-en-1-yl)oxy)benzene (2w).** Prepared according to the general procedure using 0.1081 g (0.50 mmol) of **1aa**, 0.0161 g (0.030 mmol) of **PNP**, 0.0032 g (0.025 mmol) of  $\text{CoCl}_2$ , 75  $\mu\text{L}$  (0.075 mmol) of  $\text{NaBHET}_3$ , 1 mL (0.5 M) of  $\text{PhCl}$ . Then the mixture was stirred at rt for 1 h (70% conv., 3/1 *E/Z*, monitored by  $^1\text{H}$  NMR), purified by flash column chromatography using PE as the eluent to give 0.0487 g (0.23 mmol, 48% yield, 3/1 *E/Z*) of **2w** as a yellow oil.  $^1\text{H}$  NMR (400 MHz,  $\text{CDCl}_3$ )  $\delta$  7.23-7.31 (m, 2H), 6.93-7.02 (m, 3H), 6.26 (s, 1H), 1.93 (s, 1H), 1.82-1.70 (m, 4H), 1.68 (s, 3H), 1.50-1.61 (m, 1H), 1.29 (dd,  $J = 17.2, 8.8$  Hz, 4H), 1.13-1.21 (m, 1H);  $^{13}\text{C}$  NMR (101 MHz,  $\text{CDCl}_3$ )  $\delta$  157.8, 134.9, 129.4, 126.9, 121.8, 115.8, 42.4, 31.9, 26.6, 26.3, 11.2; HRMS (ESI)  $m/z$ :  $[\text{M} + \text{Na}]^+$  Calcd for  $\text{C}_{15}\text{H}_{20}\text{NaO}^+$  239.1406, Found 239.1406.

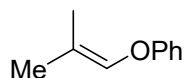

**((2-methylprop-1-en-1-yl)oxy)benzene (2x).**<sup>7</sup> Prepared according to the general procedure using 0.0741 g (0.50 mmol) of **1ab**, 0.0164 g (0.031 mmol) of **PNP**, 0.0034 g (0.026 mmol) of  $\text{CoCl}_2$ , 75  $\mu\text{L}$  (0.075 mmol) of  $\text{NaBHET}_3$ , 1 mL (0.5 M) of  $\text{PhCl}$ . Then the mixture was stirred at rt for 1 h (30 % conv., monitored by  $^1\text{H}$  NMR), purified by flash column chromatography using PE as the eluent to give 0.0138 g (0.09 mmol, 19% yield) of **2x** as a colorless oil.  $^1\text{H}$  NMR (500 MHz,  $\text{CDCl}_3$ )  $\delta$  7.26-7.32 (m, 2H), 7.03 - 6.93 (m, 3H), 6.20 (s, 1H), 1.71 (d,  $J = 15.5$  Hz, 6H).

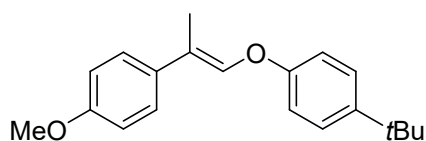

**1-(tert-butyl)-4-((2-(4-methoxyphenyl)prop-1-en-1-yl)oxy)benzene (2y).** Prepared according to the general procedure using 0.1423 g (0.48 mmol) of **1ac**, 0.0161 g (0.030 mmol) of **PNP**, 0.0032 g (0.025 mmol) of  $\text{CoCl}_2$ , 75  $\mu\text{L}$  (0.075 mmol) of  $\text{NaBHET}_3$ , 1 mL (0.5 M) of  $\text{PhCl}$ . Then the mixture was stirred at rt for 1 h (> 99% conv., 10/1 *E/Z*, monitored by  $^1\text{H}$  NMR), purified by flash column chromatography using PE as the eluent to give 0.1342 g (0.45 mmol, 88% yield, 10/1 *E/Z*) of **2y** as a yellow solid. M. P. 97.2-98.3  $^\circ\text{C}$ .  $^1\text{H}$  NMR: (400 MHz,  $\text{CDCl}_3$ )  $\delta$  7.29-7.37 (m, 4H), 6.98 (d,  $J = 8.0$  Hz, 2H), 6.88 (d,  $J = 8.0$  Hz, 2H), 6.76 (s, 1H), 3.81 (s, 3H), 2.10 (s, 3H), 1.31 (s, 9H);  $^{13}\text{C}$  NMR (101 MHz,  $\text{CDCl}_3$ )  $\delta$  158.5, 155.4, 145.3, 138.2, 132.4, 128.8, 126.5, 126.4, 119.9, 115.8, 113.9, 55.3, 34.2, 31.5, 13.1; HRMS (ESI)  $m/z$ :  $[\text{M} + \text{H}]^+$  Calcd for  $\text{C}_{20}\text{H}_{25}\text{O}_2^+$  297.1849, Found 297.1848.

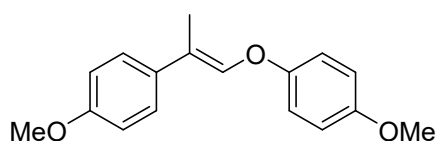

**1-methoxy-4-(1-(4-methoxyphenoxy)prop-1-en-2-yl)benzene (2z).** Prepared according to the general procedure using 0.1305 g (0.5 mmol) of **1ad**, 0.0161 g (0.030 mmol) of **PNP**, 0.0032 g (0.025 mmol) of  $\text{CoCl}_2$ , 75  $\mu\text{L}$  (0.075

mmol) of NaBHET<sub>3</sub>, 1 mL (0.5 M) of PhCl. Then the mixture was stirred at rt for 1 h (> 99% conv., 10/1 *E/Z*, monitored by <sup>1</sup>H NMR), purified by flash column chromatography using PE as the eluent to give 0.1183 g (0.44 mmol, 88% yield, 10/1 *E/Z*) of **2z** as a yellow solid. M. P. 85.9-86.1 °C. <sup>1</sup>H NMR: (400 MHz, CDCl<sub>3</sub>) δ 7.31 (d, J = 9.0 Hz, 2H), 6.98 (d, J = 9.0 Hz, 2H), 6.84-6.90 (m, 4H), 6.69 (s, 1H), 3.80 (d, J = 11.2 Hz, 6H), 2.10 (s, 3H); <sup>13</sup>C NMR (101 MHz, CDCl<sub>3</sub>) δ 158.4, 155.1, 151.7, 138.8, 132.3, 126.4, 119.2, 117.3, 114.6, 113.8, 55.6, 55.3, 13.1; HRMS (ESI) m/z: [M + Na]<sup>+</sup> Calcd for C<sub>17</sub>H<sub>18</sub>NaO<sub>3</sub><sup>+</sup> 293.1148, Found 293.1155.

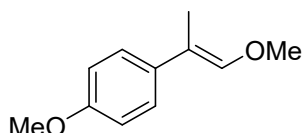

**1-methoxy-4-(1-methoxyprop-1-en-2-yl)benzene (2aa).** Prepared according to the general procedure using 0.0888 g (0.50 mmol) of **1ae**, 0.0161 g (0.030 mmol) of **PNP**, 0.0032 g (0.025 mmol) of CoCl<sub>2</sub>, 75 μL (0.075 mmol) of NaBHET<sub>3</sub>, 1 mL (0.5 M) of PhCl. Then the mixture was stirred at rt for 1 h (> 99% conv., 9/1 *E/Z*, monitored by <sup>1</sup>H NMR), purified by flash column chromatography using PE as the eluent to give 0.0764 g (0.43 mmol, 86% yield, 9/1 *E/Z*) of **2aa** as a colorless oil. <sup>1</sup>H NMR: (500 MHz, CDCl<sub>3</sub>) δ 7.22 (d, J = 8.0 Hz, 2H), 6.83 (d, J = 8.0 Hz, 2H), 6.31 (s, 1H), 3.78 (s, 3H), 3.68 (s, 3H), 1.96 (s, 3H); <sup>13</sup>C NMR: (125.8 MHz, CDCl<sub>3</sub>) δ 158.1, 144.0, 133.2, 128.6, 126.1, 113.7, 59.7, 55.2, 12.7; HRMS (ESI) m/z: [M + Na]<sup>+</sup> Calcd for C<sub>11</sub>H<sub>14</sub>NaO<sub>2</sub><sup>+</sup> 201.0886, Found 201.0896.

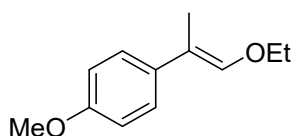

**1-(1-ethoxyprop-1-en-2-yl)-4-methoxybenzene (2ab).** Prepared according to the general procedure using 0.0228 g (0.12 mmol) of **1af**, 0.0039 g (0.0072 mmol) of **PNP**, 0.0008 g (0.006 mmol) of CoCl<sub>2</sub>, 18 μL (0.018 mmol) of NaBHET<sub>3</sub>, 0.5 mL (0.5 M) of PhCl. Then the mixture was stirred at rt for 1 h (> 99% conv., 9/1 *E/Z*, monitored by <sup>1</sup>H NMR), purified by flash column chromatography using PE as the eluent to give 0.0194 g (0.010 mmol, 85% yield, 9/1 *E/Z*) of **2ab** as a colorless oil. <sup>1</sup>H NMR: (500 MHz, CDCl<sub>3</sub>) δ 7.14 (d, J = 8.5 Hz, 2H), 6.75 (d, J = 8.5 Hz, 2H), 6.30 (s, 1H), 3.76-3.84 (m, 2H), 3.70 (s, 3H), 1.89 (s, 3H), 1.22 (t, J = 2.0 Hz, 3H); <sup>13</sup>C NMR: (125.8 MHz, CDCl<sub>3</sub>) δ 157.9, 142.6, 133.4, 128.5, 126.0, 113.8, 67.8, 55.2, 15.4, 12.8; HRMS (ESI) m/z: [M + Na]<sup>+</sup> Calcd for C<sub>12</sub>H<sub>16</sub>NaO<sub>2</sub><sup>+</sup> 215.1043, Found 215.1044.

#### **IV. Cobalt-catalyzed reductive C-O bond cleavage of allyl ethers**

**General procedure for cobalt-catalyzed reductive C-O bond cleavage of allyl ethers:** To a 10 mL flame-dried Schlenk flask cooled under argon, added with PAO<sup>Me</sup> (0.03mmol), CoCl<sub>2</sub> (0.025 mmol), THF (1 mL), alkene **1** (0.5

mmol), NaBHET<sub>3</sub> (75 μL, 0.075 mmol, 1 M in THF) and HBpin (90 μL, 0.6 mmol) in sequence. Then the reaction mixture was stirred at rt for 1 h, purified by flash column chromatography using PE/EtOAc as the eluent to give the desired product **3**.

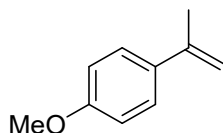

**1-methoxy-4-(prop-1-en-2-yl)benzene (3a).**<sup>10</sup> Prepared according to the general procedure using 0.1204 g (0.5 mmol) of **1a**, 0.0131 g (0.030 mmol) of PAOMe, 0.0034 g (0.025 mmol) of CoCl<sub>2</sub>, 75 μL (0.075 mmol) of NaBHET<sub>3</sub>, 90 μL of HBpin (0.6 mmol), 1 mL (0.5 M) of THF. After 1 h, the crude reaction mixture was purified by flash column chromatography using PE as the eluent to give 0.0646 g (0.44 mmol, 87% yield) of **3a** as a colorless oil. <sup>1</sup>H NMR (400 MHz, CDCl<sub>3</sub>) δ 7.41 (d, J = 8.8 Hz, 2H), 6.86 (d, J = 8.8 Hz, 2H), 5.28 (s, 1H), 4.99 (s, 1H), 3.81 (s, 3H), 2.12 (s, 3H).

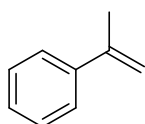

**prop-1-en-2-ylbenzene (3b).**<sup>11</sup> Prepared according to the general procedure using 0.1051 g (0.5 mmol) of **1b**, 0.0134 g (0.030 mmol) of PAOMe, 0.0034 g (0.025 mmol) of CoCl<sub>2</sub>, 75 μL (0.075 mmol) of NaBHET<sub>3</sub>, 90 μL of HBpin (0.6 mmol), 1 mL (0.5 M) of THF. After 1 h, the crude reaction mixture was purified by flash column chromatography using PE as the eluent to give 0.0557 g (0.47 mmol, 87% yield) of **3b** as a colorless oil. <sup>1</sup>H NMR: (400 MHz, CDCl<sub>3</sub>) δ 7.46 (d, J = 7.2 Hz, 2H), 7.28-7.35 (m, 2H), 7.22-7.28 (m, 1H), 5.35 (s, 1H), 5.07 (s, 1H), 2.14 (s, 3H).

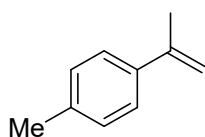

**1-methyl-4-(prop-1-en-2-yl)benzene (3c).**<sup>11</sup> Prepared according to the general procedure using 0.1109 g (0.50 mmol) of **1c**, 0.0140 g (0.032 mmol) of PAOMe, 0.0032 g (0.025 mmol) of CoCl<sub>2</sub>, 75 μL (0.075 mmol) of NaBHET<sub>3</sub>, 90 μL of HBpin (0.6 mmol), 1 mL (0.5 M) of THF. After 1 h, the crude reaction mixture was purified by flash column chromatography using PE as the eluent to give 0.0521 g (0.39 mmol, 72% yield) of **3c** as a colorless oil.

<sup>10</sup> C. Casadevall, D. Pascual, J. Aragon, A. Call, A. Casitas, I. Casademont-Reig, J. Lloret-Fillol, *Chem. Sci.* **2022**, *13*, 4270.

<sup>11</sup> X. Wang, Z. Wang, Y. Asanuma, Y. Nishihara, *Org. Lett.* **2019**, *21*, 3640.

<sup>1</sup>H NMR: (400 MHz, CDCl<sub>3</sub>) δ 7.19-7.30 (m, 3H), 7.08 (d, J = 7.6 Hz, 1H), 5.34 (s, 1H), 5.05 (s, 1H), 2.35 (s, 3H), 2.14 (s, 3H).

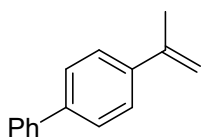

**4-(prop-1-en-2-yl)-1,1'-biphenyl (3d).**<sup>11</sup> Prepared according to the general procedure using 0.1405 g (0.49 mmol) of **1d**, 0.0140 g (0.032 mmol) of **PAO<sup>Me</sup>**, 0.0033 g (0.025 mmol) of CoCl<sub>2</sub>, 75 μL (0.075 mmol) of NaBHET<sub>3</sub>, 90 μL of HBpin (0.6 mmol), 1 mL (0.5 M) of THF. After 1 h, the crude reaction mixture was purified by flash column chromatography using PE as the eluent to give 0.0807 g (0.42 mmol, 84% yield) of **3d** as a white solid. <sup>1</sup>H NMR: (400 MHz, CDCl<sub>3</sub>) δ 7.50-7.60 (m, 6H), 7.48-7.45 (m, 2H), 7.26-7.35 (m, 1H), 5.42 (s, 1H), 5.10 (s, 1H), 2.17 (s, 3H).

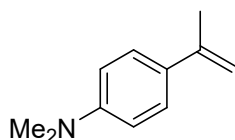

**N,N-dimethyl-4-(prop-1-en-2-yl)aniline (3e).**<sup>13</sup> Prepared according to the general procedure using 0.0776 g (0.31 mmol) of **1e**, 0.0086 g (0.019 mmol) of **PAO<sup>Me</sup>**, 0.0025 g (0.019 mmol) of CoCl<sub>2</sub>, 45 μL (0.045 mmol) of NaBHET<sub>3</sub>, 50 μL of HBpin (0.36 mmol), 1 mL (0.5 M) of THF. After 1 h, the crude reaction mixture was purified by flash column chromatography using PE as the eluent to give 0.0394 g (0.24 mmol, 82% yield) of **3e** as a colorless oil. <sup>1</sup>H NMR: (400 MHz, CDCl<sub>3</sub>) δ 7.39 (d, J = 8.8 Hz, 2H), 6.70 (d, J = 8.8 Hz, 2H), 5.25 (s, 1H), 4.90 (s, 1H), 2.95 (s, 6H), 1.22 (s, 3H).

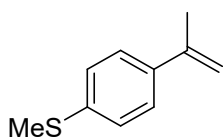

**methyl(4-(prop-1-en-2-yl)phenyl)sulfane (3f).**<sup>12</sup> Prepared according to the general procedure using 0.0757 g (0.30 mmol) of **1f**, 0.0081 g (0.018 mmol) of **PAO<sup>Me</sup>**, 0.0023 g (0.017 mmol) of CoCl<sub>2</sub>, 45 μL (0.045 mmol) of NaBHET<sub>3</sub>, 50 μL of HBpin (0.36 mmol), 1 mL (0.5 M) of THF. After 1 h, the crude reaction mixture was purified by flash column chromatography using PE as the eluent to give 0.0415 g (0.25 mmol, 84% yield) of **3f** as a white solid. <sup>1</sup>H NMR: (400 MHz, CDCl<sub>3</sub>) δ 7.40 (d, J = 8.4 Hz, 2H), 7.22 (d, J = 8.4 Hz, 2H), 5.35 (s, 1H), 5.05 (s, 1H), 2.48 (s, 3H), 2.13 (s, 3H).

<sup>12</sup> U. Chakraborty, E. Reyes-Rodriguez, S. Demeshko, F. Meyer, A. Wangelin, *Angew. Chem. Int. Ed.* **2018**, *57*, 4970.

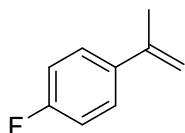

**1-fluoro-4-(prop-1-en-2-yl)benzene (3g).**<sup>11</sup> Prepared according to the general procedure using 0.1150 g (0.50 mmol) of **1g**, 0.0137 g (0.031 mmol) of **PAO<sup>Me</sup>**, 0.0036 g (0.027 mmol) of  $\text{CoCl}_2$ , 75  $\mu\text{L}$  (0.075 mmol) of  $\text{NaBHET}_3$ , 90  $\mu\text{L}$  of HBpin (0.6 mmol), 1 mL (0.5 M) of THF. After 1 h, the crude reaction mixture was purified by flash column chromatography using PE as the eluent to give 0.0608 g (0.45 mmol, 89% yield) of **3g** as a colorless oil.  $^1\text{H}$  NMR: (400 MHz,  $\text{CDCl}_3$ )  $\delta$  7.39-7.47 (m, 2H), 6.95-7.05 (m, 2H), 5.29 (s, 1H), 5.05 (s, 1H), 2.13 (s, 3H).

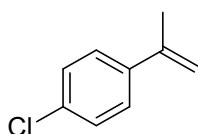

**1-chloro-4-(prop-1-en-2-yl)benzene (3h).**<sup>11</sup> Prepared according to the general procedure using 0.1245 g (0.51 mmol) of **1h**, 0.0132 g (0.030 mmol) of **PAO<sup>Me</sup>**, 0.0036 g (0.027 mmol) of  $\text{CoCl}_2$ , 75  $\mu\text{L}$  (0.075 mmol) of  $\text{NaBHET}_3$ , 90  $\mu\text{L}$  of HBpin (0.6 mmol), 1 mL (0.5 M) of THF. After 1 h, the crude reaction mixture was purified by flash column chromatography using PE as the eluent to give 0.0720 g (0.47 mmol, 94% yield) of **3h** as a colorless oil.  $^1\text{H}$  NMR: (400 MHz,  $\text{CDCl}_3$ )  $\delta$  7.38 (d,  $J = 8.4$  Hz, 2H), 7.28 (d,  $J = 8.0$  Hz, 2H), 5.34 (s, 1H), 5.08 (s, 1H), 2.11 (s, 3H).

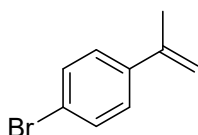

**1-bromo-4-(prop-1-en-2-yl)benzene (3i).**<sup>11</sup> Prepared according to the general procedure using 0.1475 g (0.51 mmol) of **1i**, 0.0133 g (0.030 mmol) of **PAO<sup>Me</sup>**, 0.0034 g (0.026 mmol) of  $\text{CoCl}_2$ , 75  $\mu\text{L}$  (0.075 mmol) of  $\text{NaBHET}_3$ , 90  $\mu\text{L}$  of HBpin (0.6 mmol), 1 mL (0.5 M) of THF. After 1 h, the crude reaction mixture was purified by flash column chromatography using PE as the eluent to give 0.0916 g (0.46 mmol, 92% yield) of **3i** as a colorless oil.  $^1\text{H}$  NMR: (400 MHz,  $\text{CDCl}_3$ )  $\delta$  7.43 (d,  $J = 8.4$  Hz, 2H), 7.31 (d,  $J = 8.4$  Hz, 2H), 5.34 (s, 1H), 5.09 (s, 1H), 2.11 (s, 3H).

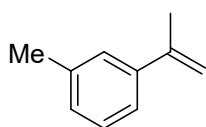

**1-methyl-3-(prop-1-en-2-yl)benzene (3j).**<sup>13</sup> Prepared according to the general procedure using 0.0672 g (0.30



mmol) of **11**, 0.0083 g (0.018 mmol) of **PAO<sup>Me</sup>**, 0.0025 g (0.018 mmol) of  $\text{CoCl}_2$ , 45  $\mu\text{L}$  (0.045 mmol) of  $\text{NaBHET}_3$ , 50  $\mu\text{L}$  of HBpin (0.36 mmol), 1 mL (0.3 M) of THF. After 1 h, the crude reaction mixture was purified by flash column chromatography using PE as the eluent to give 0.0311 g (0.24 mmol, 85% yield) of **3j** as a colorless oil.  $^1\text{H}$  NMR: (400 MHz,  $\text{CDCl}_3$ )  $\delta$  7.18-7.30 (m, 3H), 7.08 (d,  $J = 7.2$  Hz, 1H), 5.34 (s, 1H), 5.06 (s, 1H), 2.35 (s, 3H), 2.14 (s, 3H).

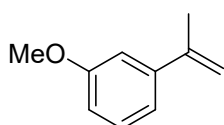

**1-methoxy-3-(prop-1-en-2-yl)benzene (3k).**<sup>15</sup> Prepared according to the general procedure using 0.1208 g (0.50 mmol) of **1m**, 0.0136 g (0.032 mmol) of **PAO<sup>Me</sup>**, 0.0035 g (0.027 mmol) of  $\text{CoCl}_2$ , 75  $\mu\text{L}$  (0.075 mmol) of  $\text{NaBHET}_3$ , 90  $\mu\text{L}$  of HBpin (0.6 mmol), 1 mL (0.5 M) of THF. After 1 h, the crude reaction mixture was purified by flash column chromatography using PE as the eluent to give 0.0640 g (0.43 mmol, 86% yield) of **3k** as a colorless oil.  $^1\text{H}$  NMR: (400 MHz,  $\text{CDCl}_3$ )  $\delta$  7.20-7.24 (m, 1H), 7.06 (d,  $J = 8.0$  Hz, 1H), 6.99 (s, 1H), 6.81 (dd,  $J = 8.4, 8.0$  Hz, 1H), 5.35 (s, 1H), 5.07 (s, 1H), 3.80 (s, 3H), 2.13 (s, 3H).

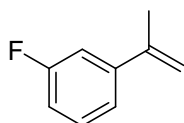

**1-fluoro-3-(prop-1-en-2-yl)benzene (3l).**<sup>16</sup> Prepared according to the general procedure using 0.1158 g (0.51 mmol) of **1o**, 0.0137 g (0.031 mmol) of **PAO<sup>Me</sup>**, 0.0033 g (0.025 mmol) of  $\text{CoCl}_2$ , 75  $\mu\text{L}$  (0.075 mmol) of  $\text{NaBHET}_3$ , 90  $\mu\text{L}$  of HBpin (0.6 mmol), 1 mL (0.5 M) of THF. After 1 h, the crude reaction mixture was purified by flash column chromatography using PE as the eluent to give 0.0613 g (0.45 mmol, 89% yield) of **3l** as a colorless oil.  $^1\text{H}$  NMR: (400 MHz,  $\text{CDCl}_3$ )  $\delta$  7.20-7.30 (m, 2H), 7.14 (d,  $J = 10.8$  Hz, 1H), 6.90-7.00 (m, 1H), 5.37 (s, 1H), 5.11 (s, 1H), 2.12 (s, 3H).

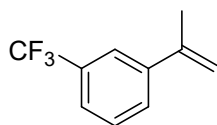

**1-(prop-1-en-2-yl)-3-(trifluoromethyl)benzene (3m).**<sup>14</sup> Prepared according to the general procedure using 0.1378 g (0.49 mmol) of **1s**, 0.0131 g (0.030 mmol) of **PAO<sup>Me</sup>**, 0.0035 g (0.027 mmol) of  $\text{CoCl}_2$ , 75  $\mu\text{L}$  (0.075 mmol) of

<sup>13</sup> J. Li, R. He, J. Liu, Y. Liu, L. Chen, Y. Huang, Y. Li, *Org. Lett.* **2022**, *24*, 1620.

<sup>14</sup> D. Phan, K. Kou, V. Dong, *J. Am. Chem. Soc.* **2010**, *132*, 16354.

NaBHET<sub>3</sub>, 90 μL of HBpin (0.6 mmol), 1 mL (0.5 M) of THF. After 1 h, the crude reaction mixture was purified by flash column chromatography using PE as the eluent to give 0.0764 g (0.41 mmol, 82% yield) of **3m** as a colorless oil. <sup>1</sup>H NMR: (400 MHz, CDCl<sub>3</sub>) δ 7.69 (s, 1H), 7.63 (d, J = 8.0 Hz, 1H), 7.51 (d, J = 8.0 Hz, 1H), 7.39-7.45 (m, 1H), 5.41 (s, 1H), 5.17 (s, 1H), 2.12 (s, 3H);

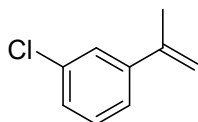

**1-chloro-3-(prop-1-en-2-yl)benzene (3n)**.<sup>15</sup> Prepared according to the general procedure using 0.1227 g (0.50 mmol) of **1p**, 0.0138 g (0.032 mmol) of PAOMe, 0.0037 g (0.028 mmol) of CoCl<sub>2</sub>, 75 μL (0.075 mmol) of NaBHET<sub>3</sub>, 90 μL of HBpin (0.6 mmol), 1 mL (0.5 M) of THF. After 1 h, the crude reaction mixture was purified by flash column chromatography using PE as the eluent to give 0.0684 g (0.45 mmol, 88% yield) of **3n** as a colorless oil. <sup>1</sup>H NMR: (400 MHz, CDCl<sub>3</sub>) δ 7.42 (s, 1H), 7.29-7.35 (m, 1H), 7.20-7.25 (m, 2H), 5.36 (s, 1H), 5.11 (s, 1H), 2.11 (s, 3H).

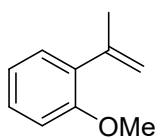

**1-methoxy-2-(prop-1-en-2-yl)benzene (3o)**.<sup>16</sup> Prepared according to the general procedure using 0.1208 g (0.50 mmol) of **1t**, 0.0140g (0.032 mmol) of PAOMe, 0.0032g (0.025 mmol) of CoCl<sub>2</sub>, 75 μL (0.075 mmol) of NaBHET<sub>3</sub>, 90 μL of HBpin (0.6 mmol), 1 mL (0.5 M) of THF. After 1 h, the crude reaction mixture was purified by flash column chromatography using PE as the eluent to give 0.0523 g (0.35 mmol, 72% yield) of **3o** as a colorless oil. <sup>1</sup>H NMR: (400 MHz, CDCl<sub>3</sub>) δ 7.15-7.28 (m, 2H), 6.85-6.95 (m, 2H), 5.14 (s, 1H), 5.05 (s, 1H), 3.81 (s, 3H), 2.11 (s, 3H).

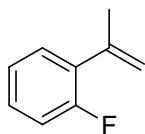

**1-fluoro-2-(prop-1-en-2-yl)benzene (3p)**.<sup>16</sup> Prepared according to the general procedure using 0.1156 g (0.51 mmol) of **1u**, 0.0137 g (0.031 mmol) of PAOMe, 0.0043 g (0.033 mmol) of CoCl<sub>2</sub>, 75 μL (0.075 mmol) of NaBHET<sub>3</sub>, 90 μL of HBpin (0.6 mmol), 1 mL (0.5 M) of THF. After 1 h, the crude reaction mixture was purified by flash

<sup>15</sup> P. Cooper, A. Dalling, E. Farrar, T. Aldhous, S. Grelaud, E. Lester, L. Feron, P. Kemmitt, M. Grayson, J. Bower, *Chem. Sci.* **2022**, *13*, 11183.

<sup>16</sup> M. Han, H. Pan, P. Li, L. Wang, *J. Org. Chem.* **2020**, *85*, 5825.

column chromatography using PE as the eluent to give 0.0574 g (0.41 mmol, 82% yield) of **3p** as a colorless oil. <sup>1</sup>H NMR: (400 MHz, CDCl<sub>3</sub>) δ 7.39-7.45 (m, 2H), 6.95-7.05 (m, 2H), 5.29 (s, 1H), 5.05 (s, 1H), 2.13 (s, 3H).

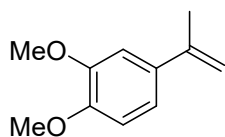

**1,2-dimethoxy-4-(prop-1-en-2-yl)benzene (3q).**<sup>17</sup> Prepared according to the general procedure using 0.0947 g (0.30 mmol) of **1v**, 0.0081 g (0.018 mmol) of **PAOMe**, 0.0020 g (0.018 mmol) of CoCl<sub>2</sub>, 45 μL (0.045 mmol) of NaBHET<sub>3</sub>, 50 μL of HBpin (0.36 mmol), 1 mL (0.3 M) of THF. After 1 h, the crude reaction mixture was purified by flash column chromatography using PE as the eluent to give 0.0580 g (0.26 mmol, 87% yield) of **3o** as a colorless oil. <sup>1</sup>H NMR (400 MHz, CDCl<sub>3</sub>) δ 7.05 - 6.99 (m, 2H), 6.83 (d, J = 8.8 Hz, 1H), 5.29 (s, 1H), 5.02 (s, 1H), 3.91 (s, 3H), 3.89 (s, 3H), 2.14 (s, 3H).

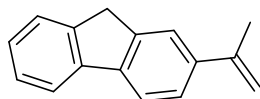

**2-(prop-1-en-2-yl)-9H-fluorene (3r).**<sup>18</sup> Prepared according to the general procedure using 0.0877 g (0.29 mmol) of **1x**, 0.0083 g (0.018 mmol) of **PAOMe**, 0.0020 g (0.015 mmol) of CoCl<sub>2</sub>, 45 μL (0.045 mmol) of NaBHET<sub>3</sub>, 50 μL of HBpin (0.36 mmol), 1 mL (0.5 M) of THF. After 1 h, the crude reaction mixture was purified by flash column chromatography using PE as the eluent to give 0.0540 g (0.26 mmol, 87% yield) of **3r** as a white solid. <sup>1</sup>H NMR: (400 MHz, CDCl<sub>3</sub>) δ 7.71-7.80 (m, 2H), 7.65 (s, 1H), 7.48-7.56 (m, 2H), 7.36 (d, J = 7.6 Hz, 1H), 7.30 (d, J = 7.6 Hz, 1H), 5.43 (s, 1H), 5.10 (s, 1H), 2.21 (s, 2H), (s, 3H).

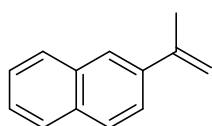

**2-(prop-1-en-2-yl)naphthalene (3s).**<sup>11</sup> Prepared according to the general procedure using 0.1300 g (0.50 mmol) of **1y**, 0.0132 g (0.030 mmol) of **PAOMe**, 0.0037 g (0.028 mmol) of CoCl<sub>2</sub>, 75 μL (0.075 mmol) of NaBHET<sub>3</sub>, 90 μL of HBpin (0.6 mmol), 1 mL (0.5 M) of THF. After 1 h, the crude reaction mixture was purified by flash column chromatography using PE as the eluent to give 0.0699 g (0.42 mmol, 85% yield) of **3s** as a white solid. <sup>1</sup>H NMR: (400 MHz, CDCl<sub>3</sub>) δ 7.74-7.86 (m, 4H), 7.61-7.68 (m, 1H), 7.39-7.46 (m, 2H), 5.51 (s, 1H), 5.17 (s, 1H), 2.25 (s, 3H).

<sup>17</sup> J. Wu, L. Gong, Y. Xia, R. Song, Y. Xie, J. Li, *Angew. Chem. Int. Ed.* **2012**, *51*, 9909.

<sup>18</sup> L. Gao, X. Liu, G. Li, S. Chen, J. Cao, G. Wang, S. Li, *Org. Lett.* **2022**, *24*, 31, 5698.

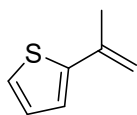

**2-(prop-1-en-2-yl)thiophene (3t).**<sup>11</sup> Prepared according to the general procedure using 0.1121 g (0.51 mmol) of **1z**, 0.0133 g (0.03 mmol) of **PAOMe**, 0.0040 g (0.03 mmol) of  $\text{CoCl}_2$ , 75  $\mu\text{L}$  (0.075 mmol) of  $\text{NaBHET}_3$ , 90  $\mu\text{L}$  of **HBpin** (0.6 mmol), 1 mL (0.5 M) of **THF**. After 1 h, the crude reaction mixture was purified by flash column chromatography using **PE** as the eluent to give 0.0434 g (0.35 mmol, 87% yield) of **3t** as a colorless oil.  $^1\text{H NMR}$ : (400 MHz,  $\text{CDCl}_3$ )  $\delta$  7.15 (s, 1H), 7.01 (s, 1H), 6.96 (s, 1H), 5.37 (s, 1H), 4.94 (s, 1H), 2.14 (s, 3H);

### V. Gram-scale reactions.

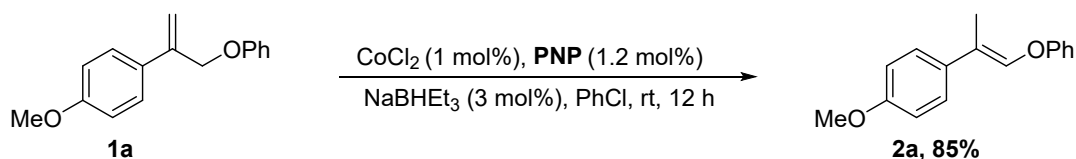

Performed according to the general procedure using 1.2026 g (5 mmol) of **1a**, 0.0323 g (0.06 mmol) of **PNP**, 0.0064 g (0.05 mmol) of  $\text{CoCl}_2$ , 150  $\mu\text{L}$  (0.15 mmol) of  $\text{NaBHET}_3$  and 10 mL (1.0 M) of **PhCl**. The reaction mixture was stirred at rt for 12 h ( $> 99\%$  conv., 10/1 *E/Z*, monitored by  $^1\text{H NMR}$ ), passed through a pad of silica gel and washed with **EA**, concentrated under reduced pressure. Then the residue was purified by flash column chromatography using **PE/EtOAc** as the eluent to give 1.0222 g (4.3 mmol, 85% yield,  $>20/1$  *E/Z*) of **2a** as a white solid.

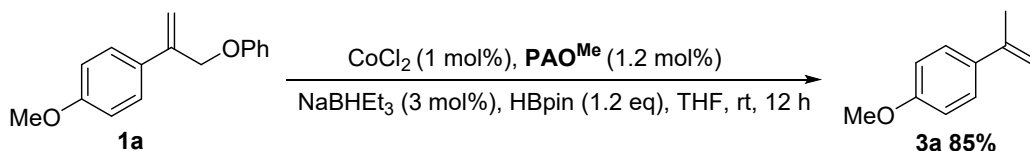

Performed according to the general procedure using 1.9233 g (8 mmol) of **1a**, 0.0419 g (0.096 mmol) of **PAOMe**, 0.0108 g (0.08 mmol) of  $\text{CoCl}_2$ , 240  $\mu\text{L}$  (0.24 mmol) of  $\text{NaBHET}_3$ , 1.2290 g (9.6 mmol) of **HBpin** and 10 mL (1.0 M) of **THF**. The reaction mixture was stirred at rt for 12 h, passed through a pad of silica gel and washed with **PE**, concentrated under reduced pressure. Then the residue was purified by flash column chromatography using **PE** as the eluent to give 1.0200 g (6.9 mmol, 85% yield) of **3a** as a white solid.

### VI. Further derivatizations.

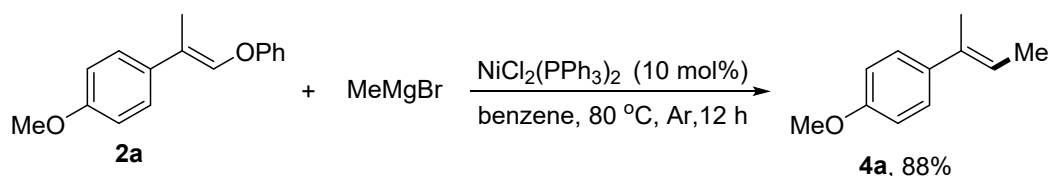

**(E)-1-(but-2-en-2-yl)-4-methoxybenzene (4a):**<sup>2</sup> Performed according to a previously reported procedure:<sup>19</sup> To a 10 mL flame-dried Schlenk flask cooled under argon, 0.0597 g (0.25 mmol) of **2a**, 0.5 mL (0.5 mmol, 1 mmol/mL in THF) of MeMgBr, 0.0186 g (0.025 mmol) of NiCl<sub>2</sub>(PPh<sub>3</sub>)<sub>2</sub> and 1 mL (0.25 M) of benzene were added in sequence. Then the mixture was stirred at 80 °C for 12 h, cooled to room temperature, passed through a pad of silica gel, washed with EA, concentrated under reduced pressure. The residue was purified by flash column chromatography using PE/EtOAc as the eluent to give 0.0357 g (0.22mmol, 88% yield, >20/1 *E/Z*) of **4a** as a white solid. <sup>1</sup>H NMR (500 MHz, CDCl<sub>3</sub>) δ 7.30 (d, J = 8.5 Hz, 2H), 6.84 (d, J = 8.5 Hz, 2H), 5.74-5.80 (m, 1H), 3.80 (s, 3H), 2.00 (s, 3H), 1.78 (d, J = 6.5 Hz, 3H).

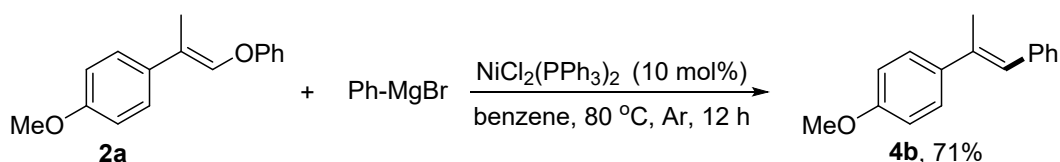

**(E)-1-methoxy-4-(1-phenylprop-1-en-2-yl)benzene (4b):**<sup>20</sup> Performed according to a previously reported procedure:<sup>19</sup> To a 10 mL flame-dried Schlenk flask cooled under argon, 0.0599 g (0.25 mmol) of **2a**, 0.5 mL (0.5 mmol, 1 mmol/mL in THF) of PhMgBr, 0.0328 g (0.05 mmol) of NiCl<sub>2</sub>(PPh<sub>3</sub>)<sub>2</sub> and 1 mL (0.25 M) of benzene were added in sequence. Then the mixture was stirred at 80 °C for 12 h, cooled to room temperature, passed through a pad of silica gel, washed with EA, concentrated under reduced pressure. The residue was purified by flash column chromatography using PE/EtOAc as the eluent to give 0.0400 g (0.18mmol, 71% yield, 17/1 *E/Z*) of **4b** as a white solid. <sup>1</sup>H NMR (500 MHz, CDCl<sub>3</sub>) δ 7.47 (d, J = 9.0 Hz, 2H), 7.33-7.38 (m, 4H), 6.91 (d, J = 9.0 Hz, 2H), 6.78 (s, 1H), 3.84 (s, 3H), 2.26 (s, 3H).

## VII. Preliminary mechanistic studies

### (a) Radical Trap Experiments:

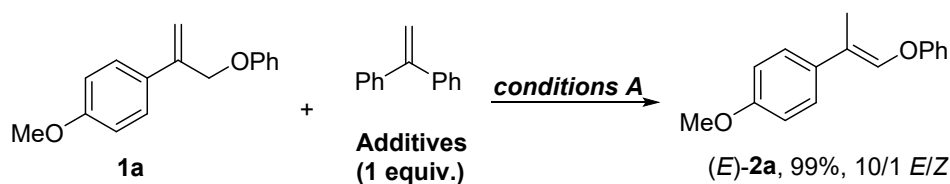

To a 10 mL flame-dried Schlenk flask cooled under argon, 0.0034 g (0.026 mmol) of CoCl<sub>2</sub>, 0.0164 g (0.031 mmol) of PNP, 1 mL of PhCl, 0.1195 g (0.5 mmol) of **1a** and 0.0898 g (0.5 mmol) of ethene-1,1-diylidibenzene were added in sequence. The mixture was stirred at room temperature for 5 minutes, then NaBHET<sub>3</sub> (75 μL, 0.075 mmol)

<sup>19</sup> Y. Nassar, F. Rodier, V. Ferey, J. Cossy, *ACS Catal.* **2021**, *11*, 5736.

<sup>20</sup> X. Hu, J. He, Z. Ying, J. Zhou, J. Yu, *Chin. J. Chem.* **2021**, *39*, 2227.

was added by dropwise. After stirring at room temperature for 1 h, the reaction was monitored by  $^1\text{H}$  NMR (99% conv., 10/1 *E/Z*).

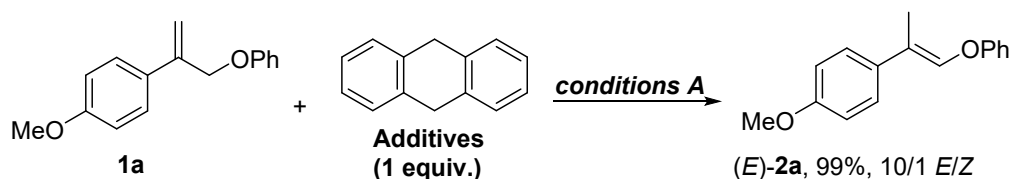

To a 10 mL flame-dried Schlenk flask cooled under argon, 0.0033 g (0.025 mmol) of  $\text{CoCl}_2$ , 0.0168 g (0.031 mmol) of PNP, 1 mL of  $\text{PhCl}$ , 0.1202 g (0.5 mmol) of **1a** and 0.0896 g (0.5 mmol) of 9,10-dihydroanthracene were added in sequence. The mixture was stirred at room temperature for 5 minutes, then  $\text{NaBHET}_3$  (75  $\mu\text{L}$ , 0.075 mmol) was added by dropwise. After stirring at room temperature for 1 h, the reaction was monitored by  $^1\text{H}$  NMR (99% conv., 10/1 *E/Z*).

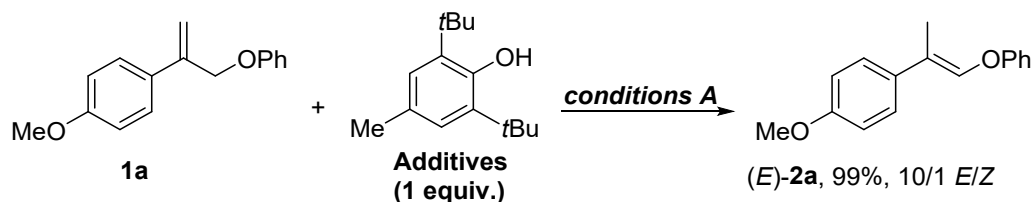

To a 10 mL flame-dried Schlenk flask cooled under argon, 0.0032 g (0.025 mmol) of  $\text{CoCl}_2$ , 0.0164 g (0.031 mmol) of PNP, 1 mL of  $\text{PhCl}$ , 0.1205 g (0.5 mmol) of **1a** and 0.1082 g (0.49 mmol) of di-*tert*-butylhydroxytoluene were added in sequence. The mixture was stirred at room temperature for 5 minutes, then  $\text{NaBHET}_3$  (75  $\mu\text{L}$ , 0.075 mmol) was added by dropwise. After stirring at room temperature for 1 h, the reaction was monitored by  $^1\text{H}$  NMR (99% conv., 10/1 *E/Z*).

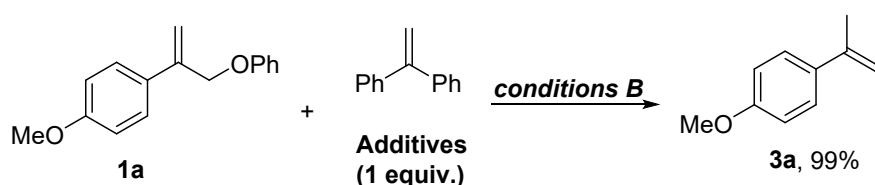

To a 10 mL flame-dried Schlenk flask cooled under argon, 0.0036 g (0.027 mmol) of  $\text{CoCl}_2$ , 0.0134 g (0.031 mmol) of  $\text{PAO}^{\text{Me}}$ , 1 mL of THF, 0.1203 g (0.5 mmol) of **1a** and 0.0894 g (0.50 mmol) of ethene-1,1-diyldibenzene were added in sequence. The mixture was stirred at room temperature for 5 minutes, then  $\text{NaBHET}_3$  (75  $\mu\text{L}$ , 0.075 mmol) and HBpin (90  $\mu\text{L}$ , 0.60 mmol) was added by dropwise. After stirring at room temperature for 1 h, the reaction was monitored by  $^1\text{H}$  NMR (99% conv.).

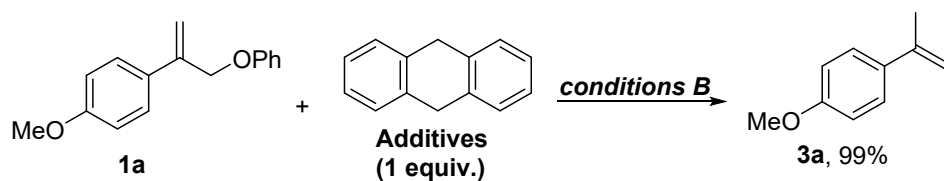

To a 10 mL flame-dried Schlenk flask cooled under argon, 0.0035 g (0.027 mmol) of  $\text{CoCl}_2$ , 0.0134 g (0.031 mmol) of  $\text{PAO}^{\text{Me}}$ , 1 mL of THF, 0.1208 g (0.5 mmol) of **1a** and 0.0894 g (0.50 mmol) of 9,10-dihydroanthracene were added in sequence. The mixture was stirred at room temperature for 5 minutes, then  $\text{NaBHET}_3$  (75  $\mu\text{L}$ , 0.075 mmol) and HBpin (90  $\mu\text{L}$ , 0.60 mmol) was added by dropwise. After stirring at room temperature for 1 h, the reaction was monitored by  $^1\text{H}$  NMR (99% conv.).

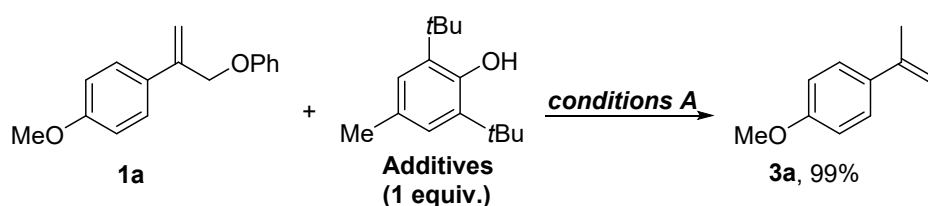

To a 10 mL flame-dried Schlenk flask cooled under argon, 0.0032 g (0.025 mmol) of  $\text{CoCl}_2$ , 0.0141 g (0.032 mmol) of  $\text{PAO}^{\text{Me}}$ , 1 mL of THF, 0.1205 g (0.5 mmol) of **1a** and 0.1095 g (0.50 mmol) of di-tert-butylhydroxytoluene were added in sequence. The mixture was stirred at room temperature for 5 minutes, then  $\text{NaBHET}_3$  (75  $\mu\text{L}$ , 0.075 mmol) and HBpin (90  $\mu\text{L}$ , 0.60 mmol) was added by dropwise. After stirring at room temperature for 1 h, the reaction was monitored by  $^1\text{H}$  NMR (99% conv.).

**(b) H/D scrambling experiments:**

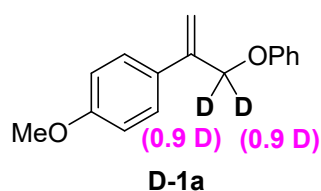

**1-methoxy-4-(3-phenoxyprop-1-en-2-yl-3,3-d<sub>2</sub>)benzene (D-1a).** Prepared according to the general procedure<sup>21</sup> of Wittig reaction using  $\text{Ph}_3\text{PMeBr}$  and 1-(4-methoxyphenyl)-2-phenoxyethan-1-one-2,2-d<sub>2</sub> (prepared according to a previously reported method, 100% D) as the starting materials, white solid.  $^1\text{H}$  NMR (400 MHz,  $\text{CDCl}_3$ )  $\delta$  7.43 (d,  $J = 8.8$  Hz, 2H), 7.27-7.31 (m, 2H), 6.94-6.99 (m, 3H), 6.89 (d,  $J = 8.8$  Hz, 2H), 5.53 (s, 1H), 5.37 (s, 1H), 4.85 (s, 0.2H), 3.82 (s, 3H).  $^2\text{H}$  NMR (61 MHz,  $\text{CDCl}_3$ ):  $\delta$  4.85 (s, 1.8D).

<sup>21</sup> J. Zhao, B. Cheng, C. Chen, Z. Lu, *Org. Lett.* **2020**, *22*, 837.

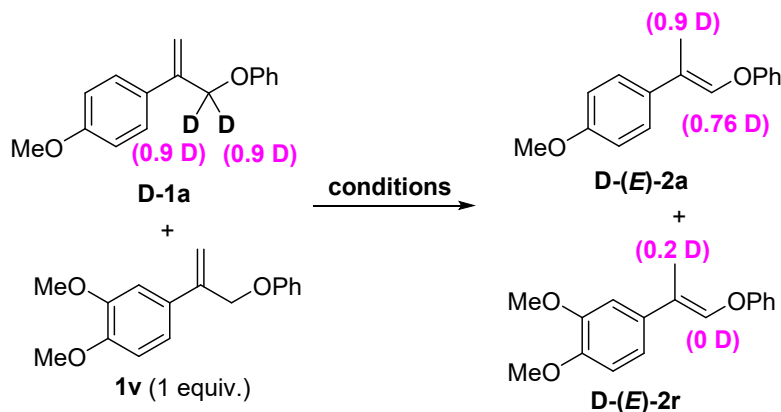

Performed according to the general procedure using 0.0603 g (0.25 mmol) of **D-1a**, 0.0681 g (0.25 mmol) of **1v**, 0.0043 g (0.030 mmol) of  $\text{CoCl}_2$ , 0.0179 g (0.033 mmol) of **PNP**, 75  $\mu\text{L}$  (1 M in THF, 0.075 mmol) of  $\text{NaBHET}_3$  and 1 mL of PhCl. After 1 h, the crude reaction mixture was purified by flash column chromatography using PE as the eluent to give **D-(E)-2a** (0.0550 g, 0.23 mmol, 91%) and **D-(E)-2v** (0.0621 mg, 0.23 mmol, 91%), respectively. For **D-(E)-2a**:  $^1\text{H NMR}$  (400 MHz,  $\text{CDCl}_3$ )  $\delta$  7.30-7.35 (m, 4H), 7.04 (d,  $J = 8.4$  Hz, 3H), 6.88 (d,  $J = 8.4$  Hz, 2H), 6.76 (s, 0.24H), 3.81 (s, 3H), 2.11 (s, 2.1H).  $^2\text{H NMR}$  (400 MHz,  $\text{CHCl}_3$ ):  $\delta$  4.85 (s, 1.8D).  $^2\text{H NMR}$  (61 MHz,  $\text{CDCl}_3$ )  $\delta$  6.77 (s, 0.76D), 2.09 (d,  $J = 2.4$  Hz, 0.9D). For **D-(E)-2v**:  $^1\text{H NMR}$  (400 MHz,  $\text{CDCl}_3$ )  $\delta$  7.30-7.35 (m, 2H), 7.05 (d,  $J = 8.4$  Hz, 3H), 6.95 (d,  $J = 8.4$  Hz, 1H), 6.91 (s, 1H), 6.85 (d,  $J = 8.3$  Hz, 1H), 6.77 (s, 1H), 3.90 (s, 3H), 3.88 (s, 3H), 2.13 (s, 3H).  $^2\text{H NMR}$  (61 MHz,  $\text{CDCl}_3$ )  $\delta$  2.12 (s, 0.20D).

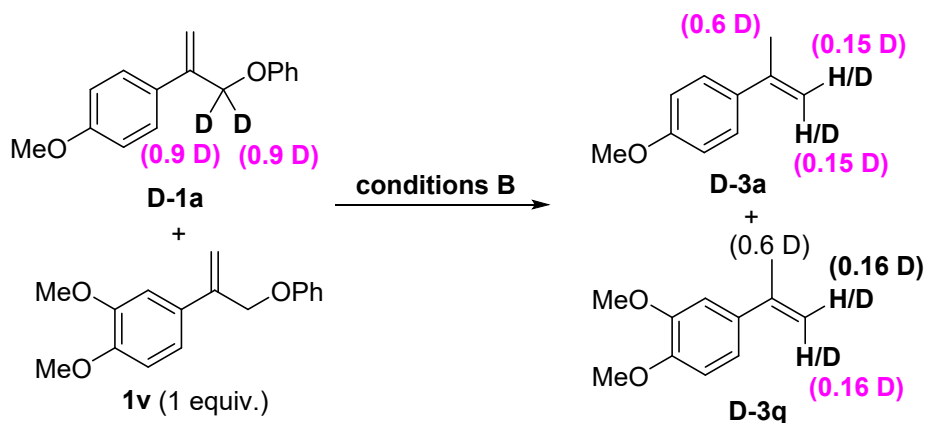

Prepared according to the general procedure using 0.0600 g (0.25 mmol) of **D-1a**, 0.0698 g (0.26 mmol) of **1v**, 0.0039 g (0.030 mmol) of  $\text{CoCl}_2$ , 0.0139 g (0.032 mmol) of **PAOMe**, 75  $\mu\text{L}$  (1 M in THF, 0.075 mmol) of  $\text{NaBHET}_3$  and 1 mL of THF. After 1 h, the crude reaction mixture was purified by flash column chromatography using PE as the eluent to give **D-3a** (0.0277 g, 0.19 mmol, 75%) and **D-3q** (0.0387 mg, 0.22 mmol, 87%), respectively. For **D-3a**:  $^1\text{H NMR}$  (400 MHz,  $\text{CDCl}_3$ )  $\delta$  7.41 (d,  $J = 8.8$  Hz, 2H), 6.86 (d,  $J = 8.8$  Hz, 2H), 5.29 (s, 0.85H), 4.99 (s, 0.85H), 3.81 (s, 3H), 2.13 (s, 2.40H).  $^2\text{H NMR}$  (61 MHz,  $\text{CDCl}_3$ )  $\delta$  5.29 (s, 0.15D), 4.99 (s, 0.15D), 2.08 (d,  $J = 2.0$  Hz,



0.6D). For D-**3q**:  $^1\text{H}$  NMR (400 MHz,  $\text{CDCl}_3$ )  $\delta$  7.04 - 7.00 (m, 2H), 6.83 (d,  $J = 8.8$  Hz, 1H), 5.29 (s, 0.84H), 5.01 (s, 0.84H), 3.91 (s, 3H), 3.89 (s, 3H), 2.14 (s, 2.40H).  $^2\text{H}$  NMR (61 MHz,  $\text{CDCl}_3$ )  $\delta$  5.32 (s, 0.16D), 5.04 (s, 0.16D), 2.12 (s, 0.6D).

## VIII. NMR Spectra

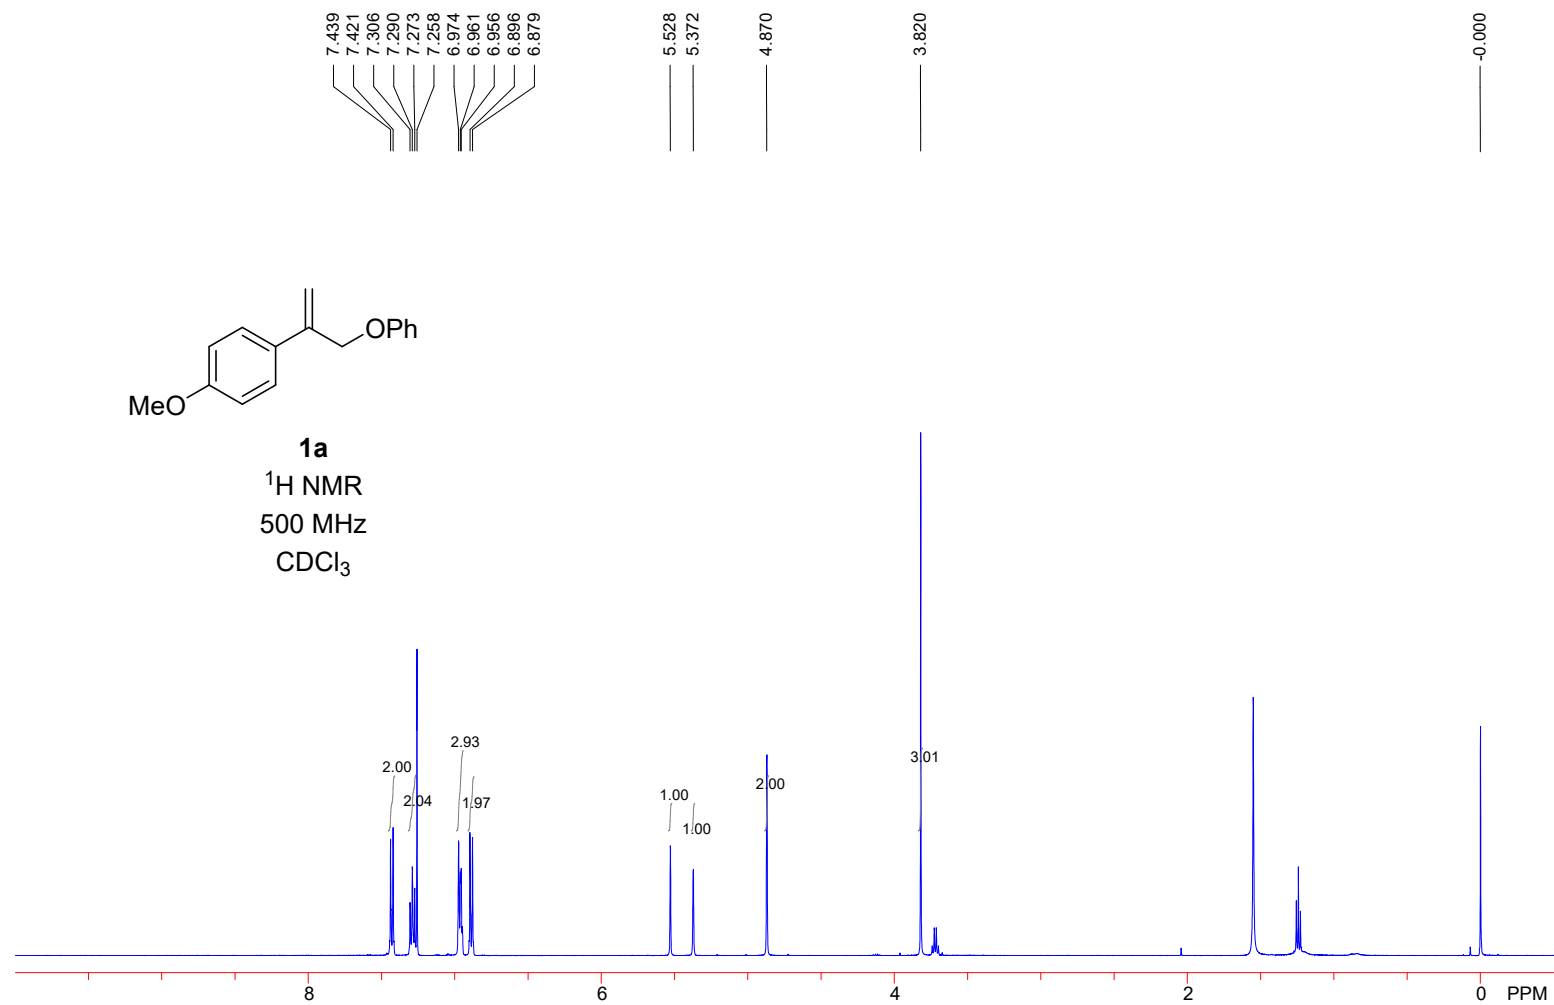

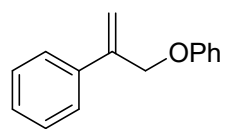

**1b**  
<sup>1</sup>H NMR  
500 MHz  
CDCl<sub>3</sub>

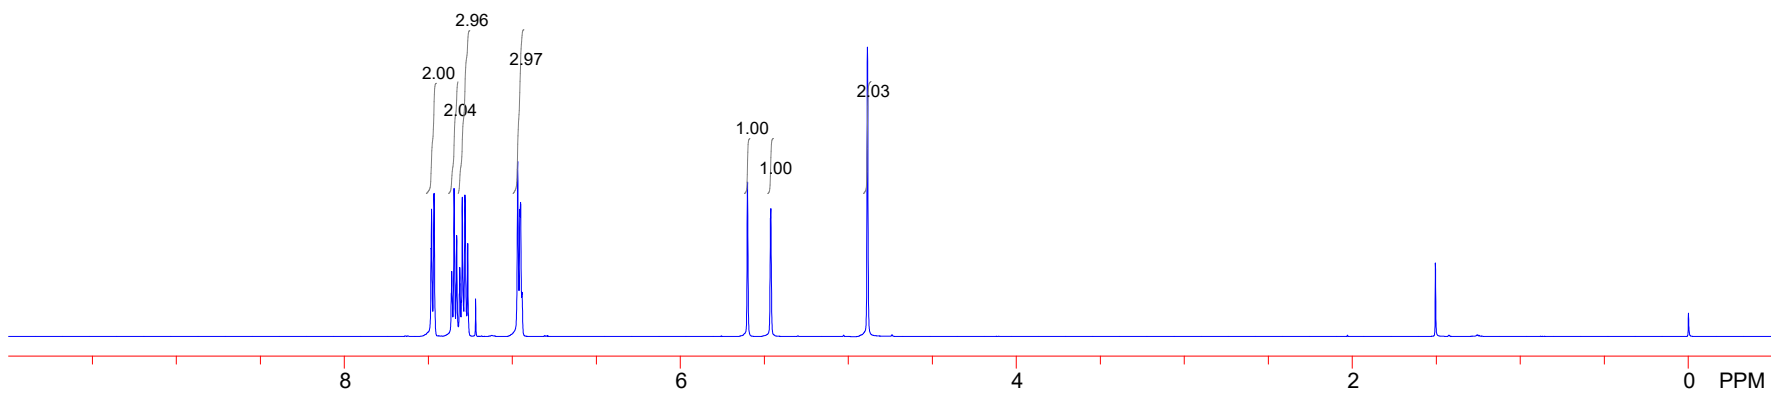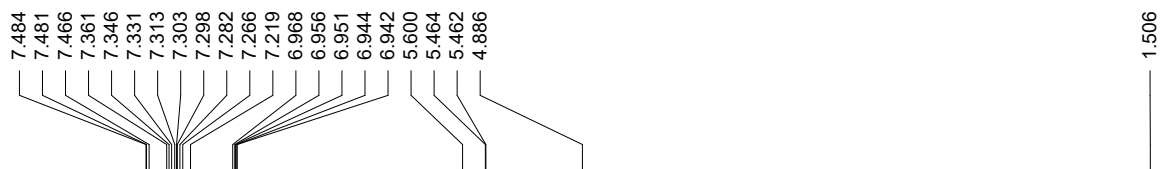

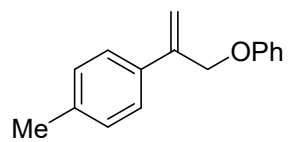

**1c**

<sup>1</sup>H NMR  
500 MHz  
CDCl<sub>3</sub>

7.377  
7.361  
7.290  
7.275  
7.258  
7.157  
7.141  
6.962  
6.948

5.567  
5.409

4.863

2.341

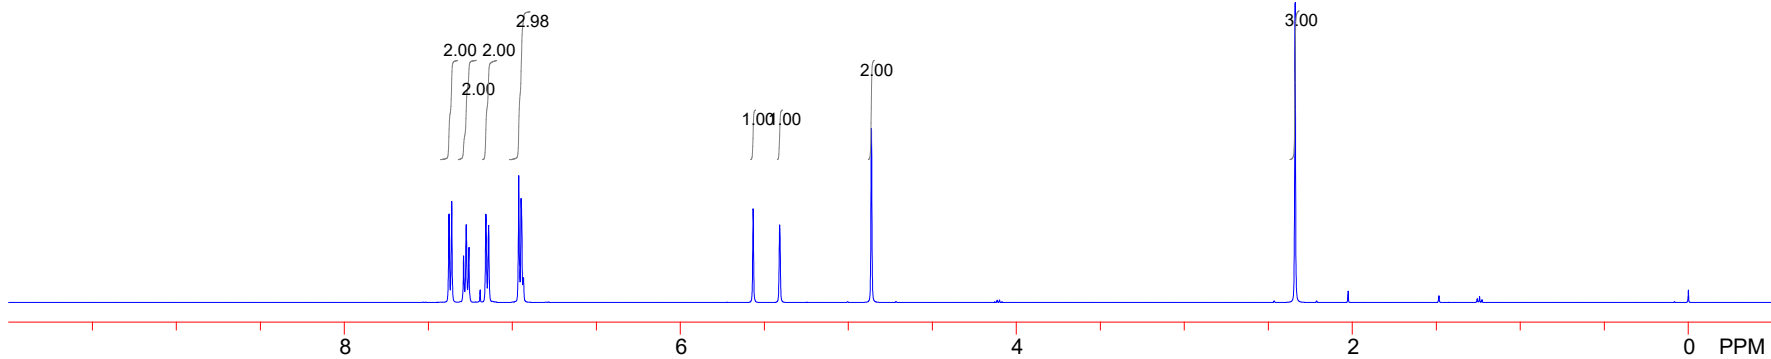

S36

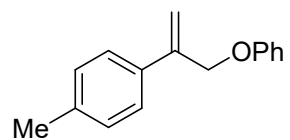

**1c**

<sup>13</sup>C NMR  
500 MHz  
CDCl<sub>3</sub>

158.680

142.855

137.770

135.474

129.399

129.139

125.868

120.949

114.962

113.864

77.253

77.000

76.740

69.828

21.098

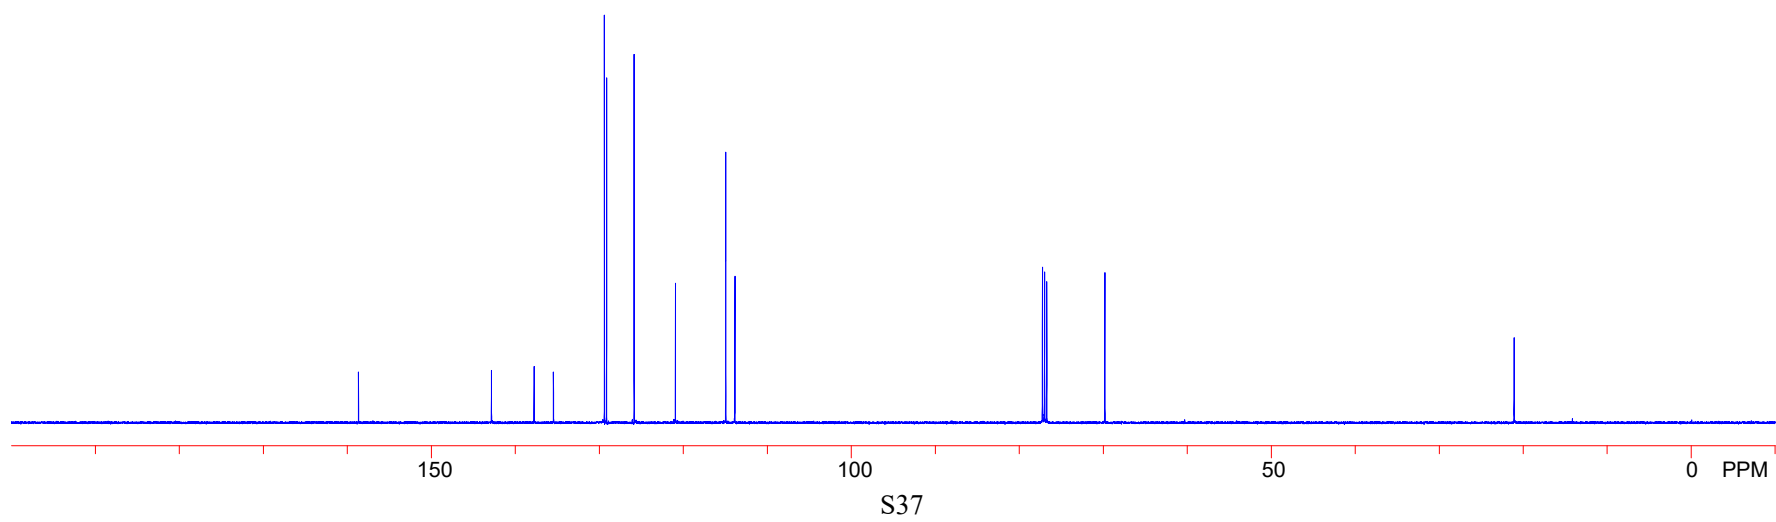

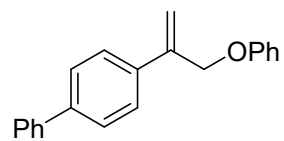

**1d**

<sup>1</sup>H NMR  
500 MHz  
CDCl<sub>3</sub>

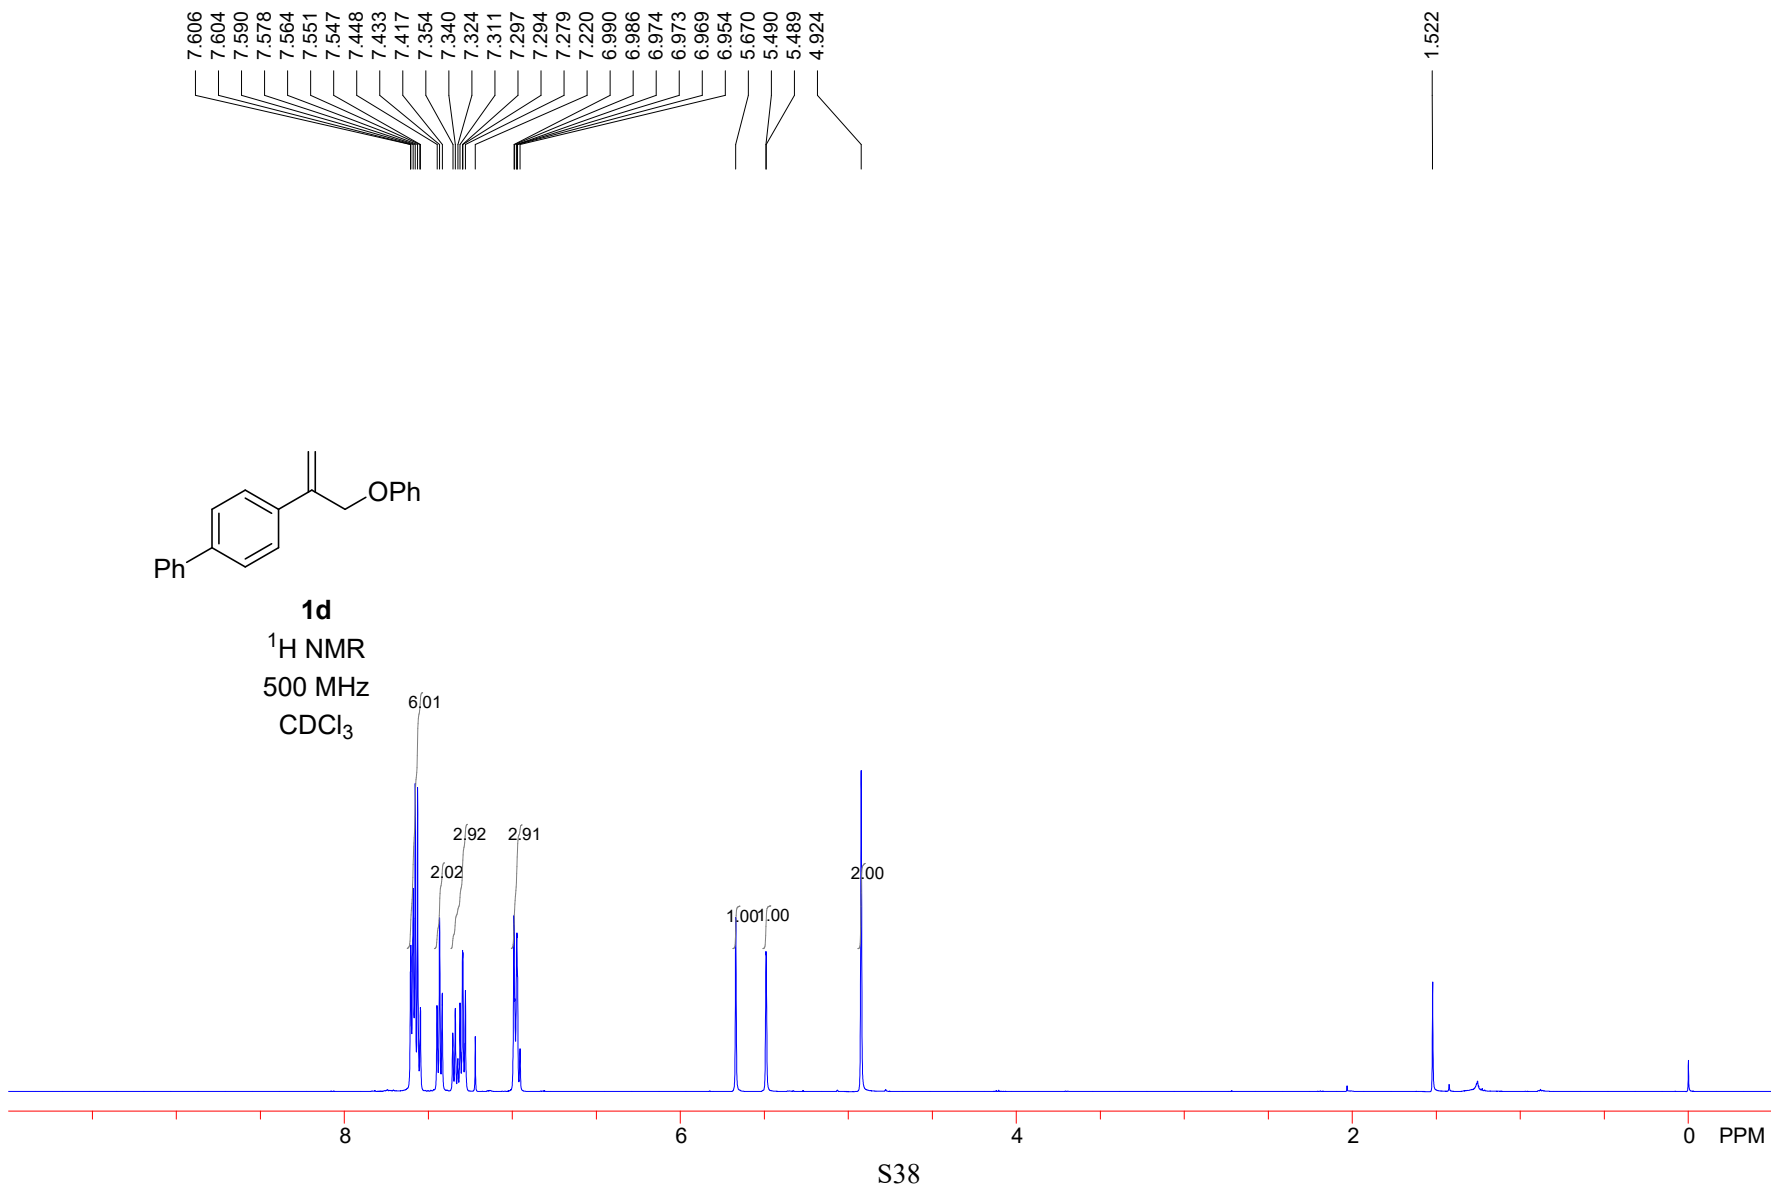

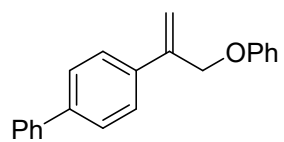

**1d**

<sup>13</sup>C NMR  
500 MHz  
CDCl<sub>3</sub>

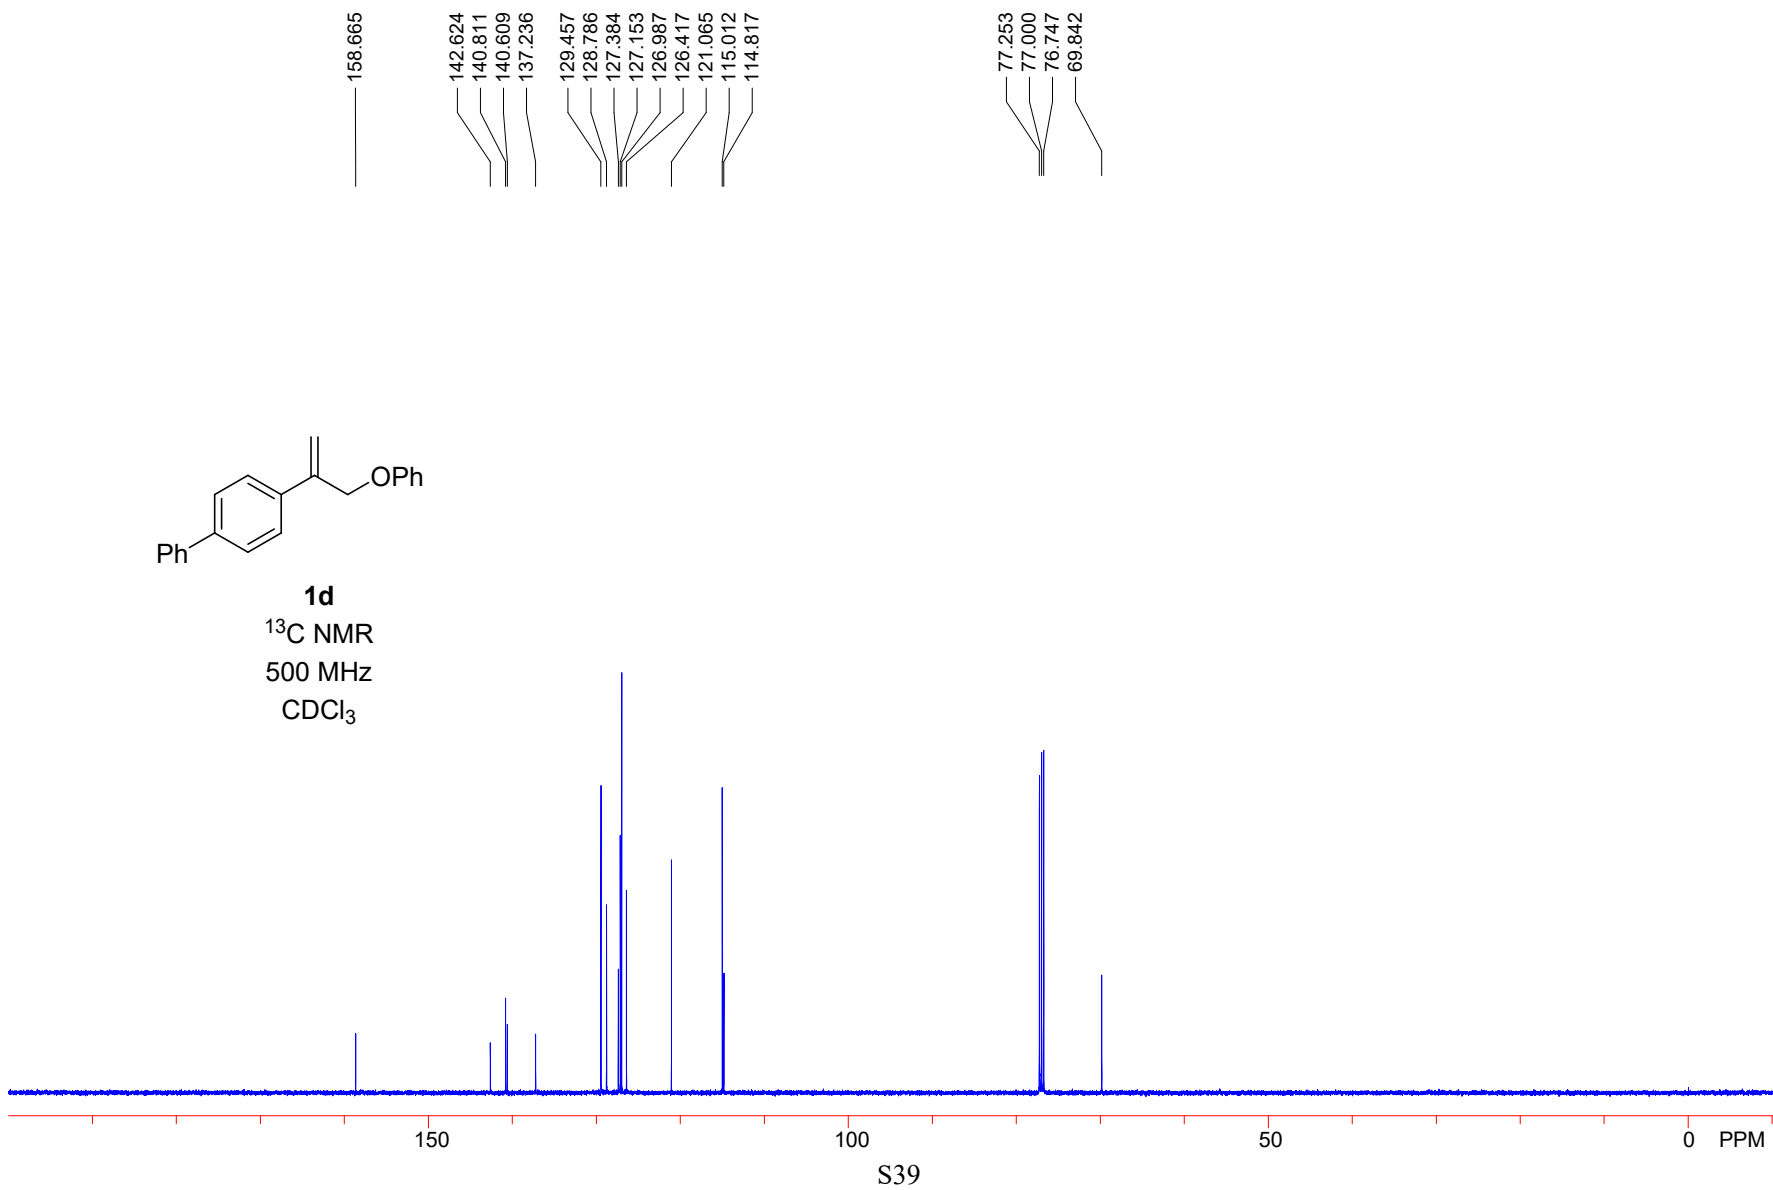

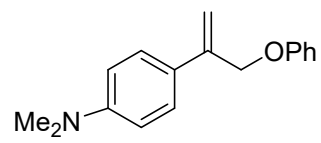

**1e**

<sup>1</sup>H NMR  
400 MHz  
CDCl<sub>3</sub>

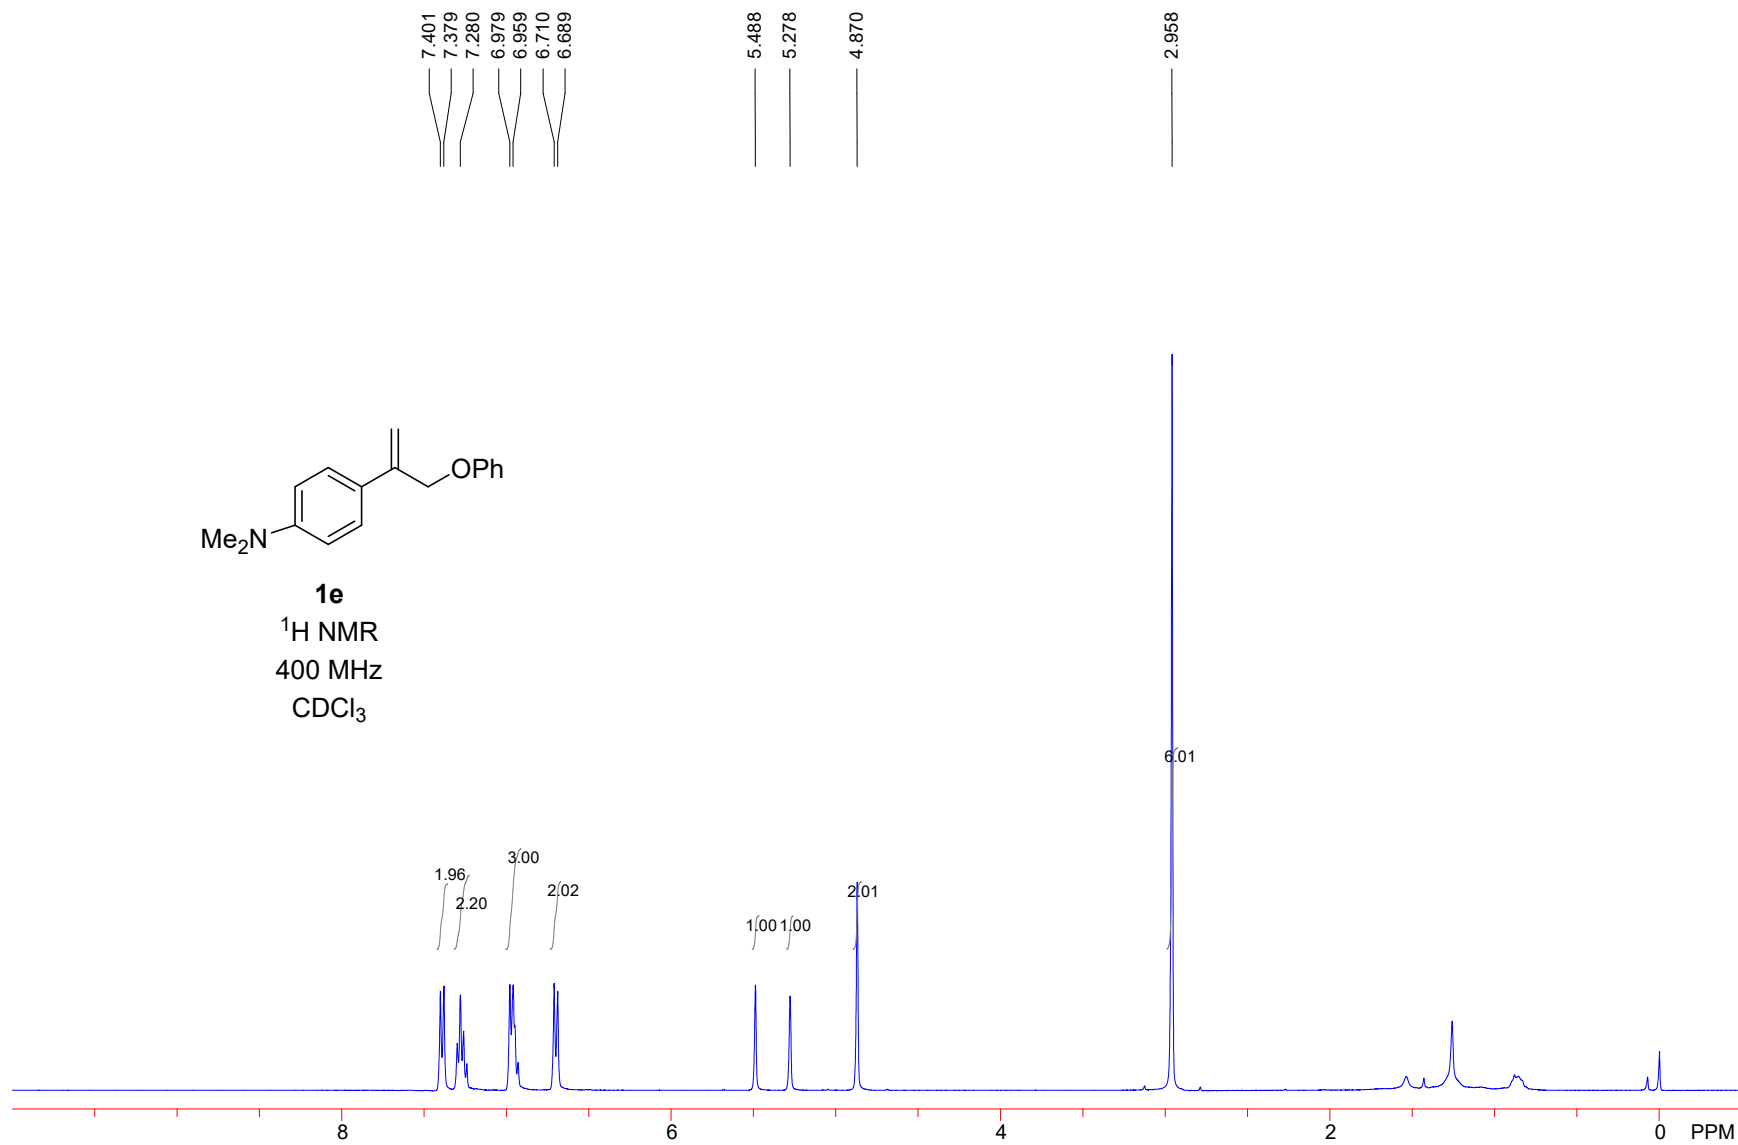

S40



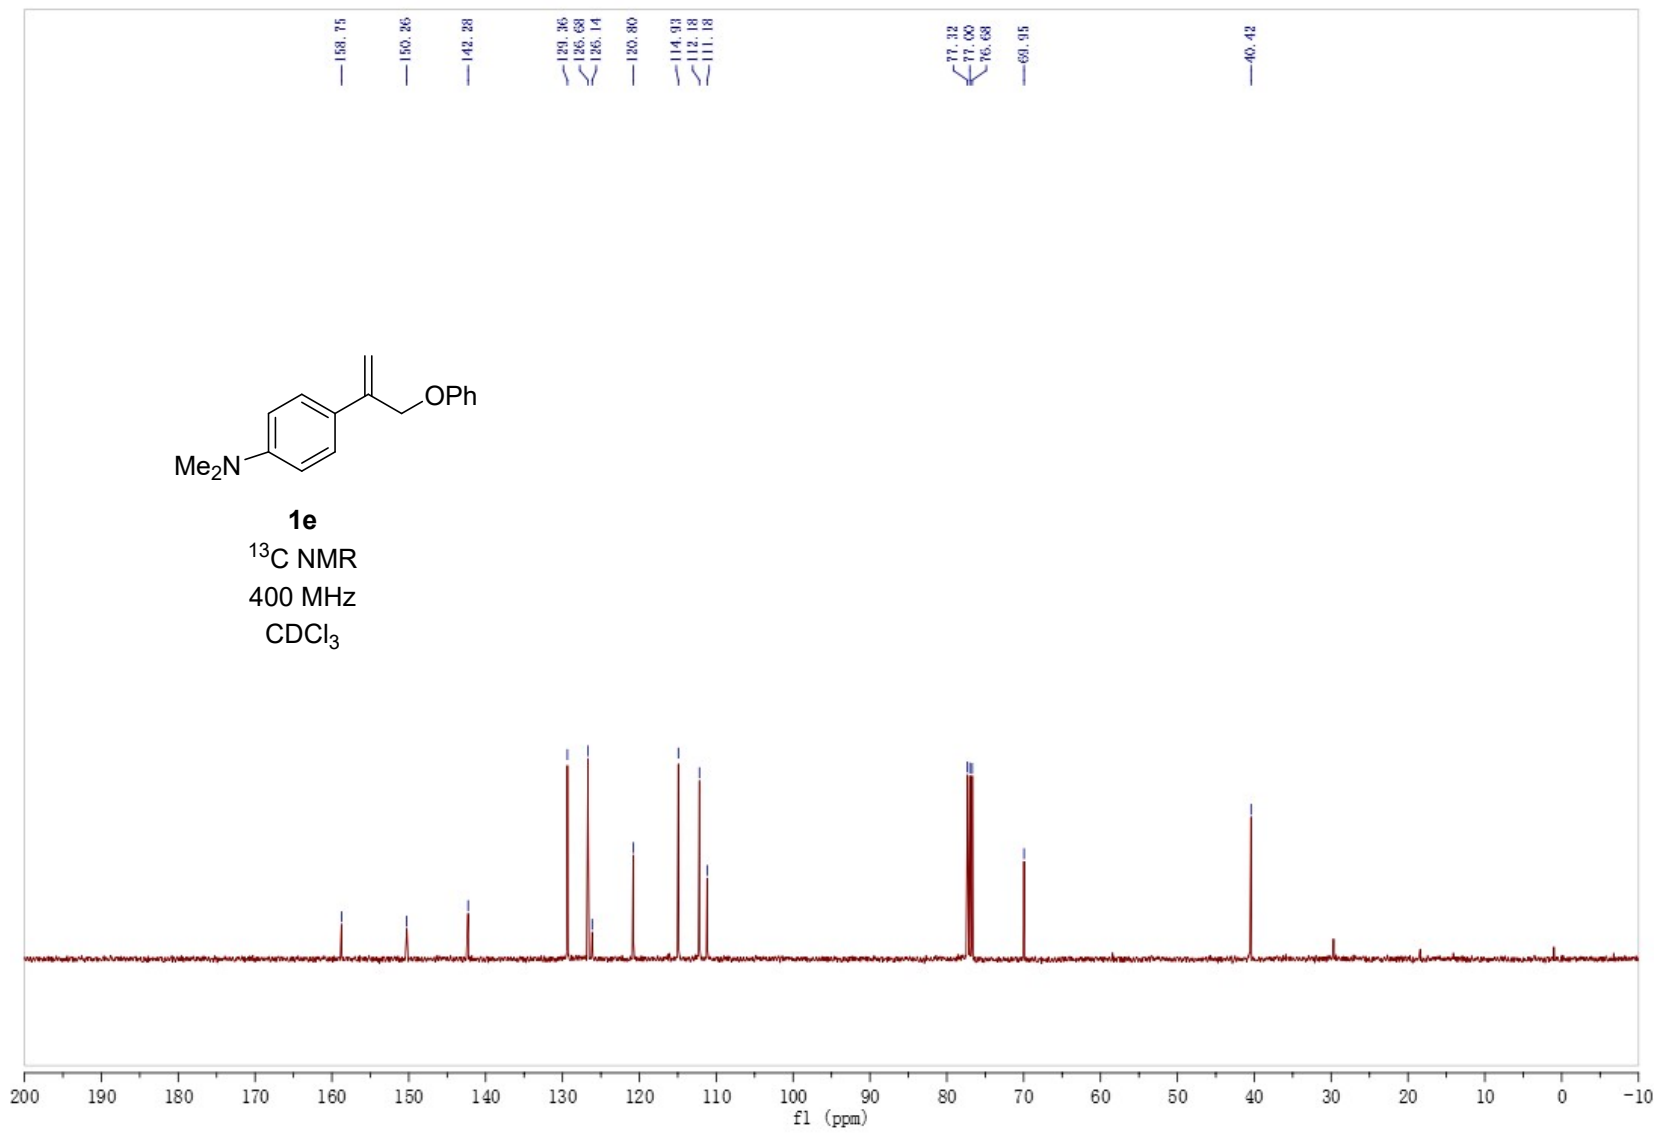

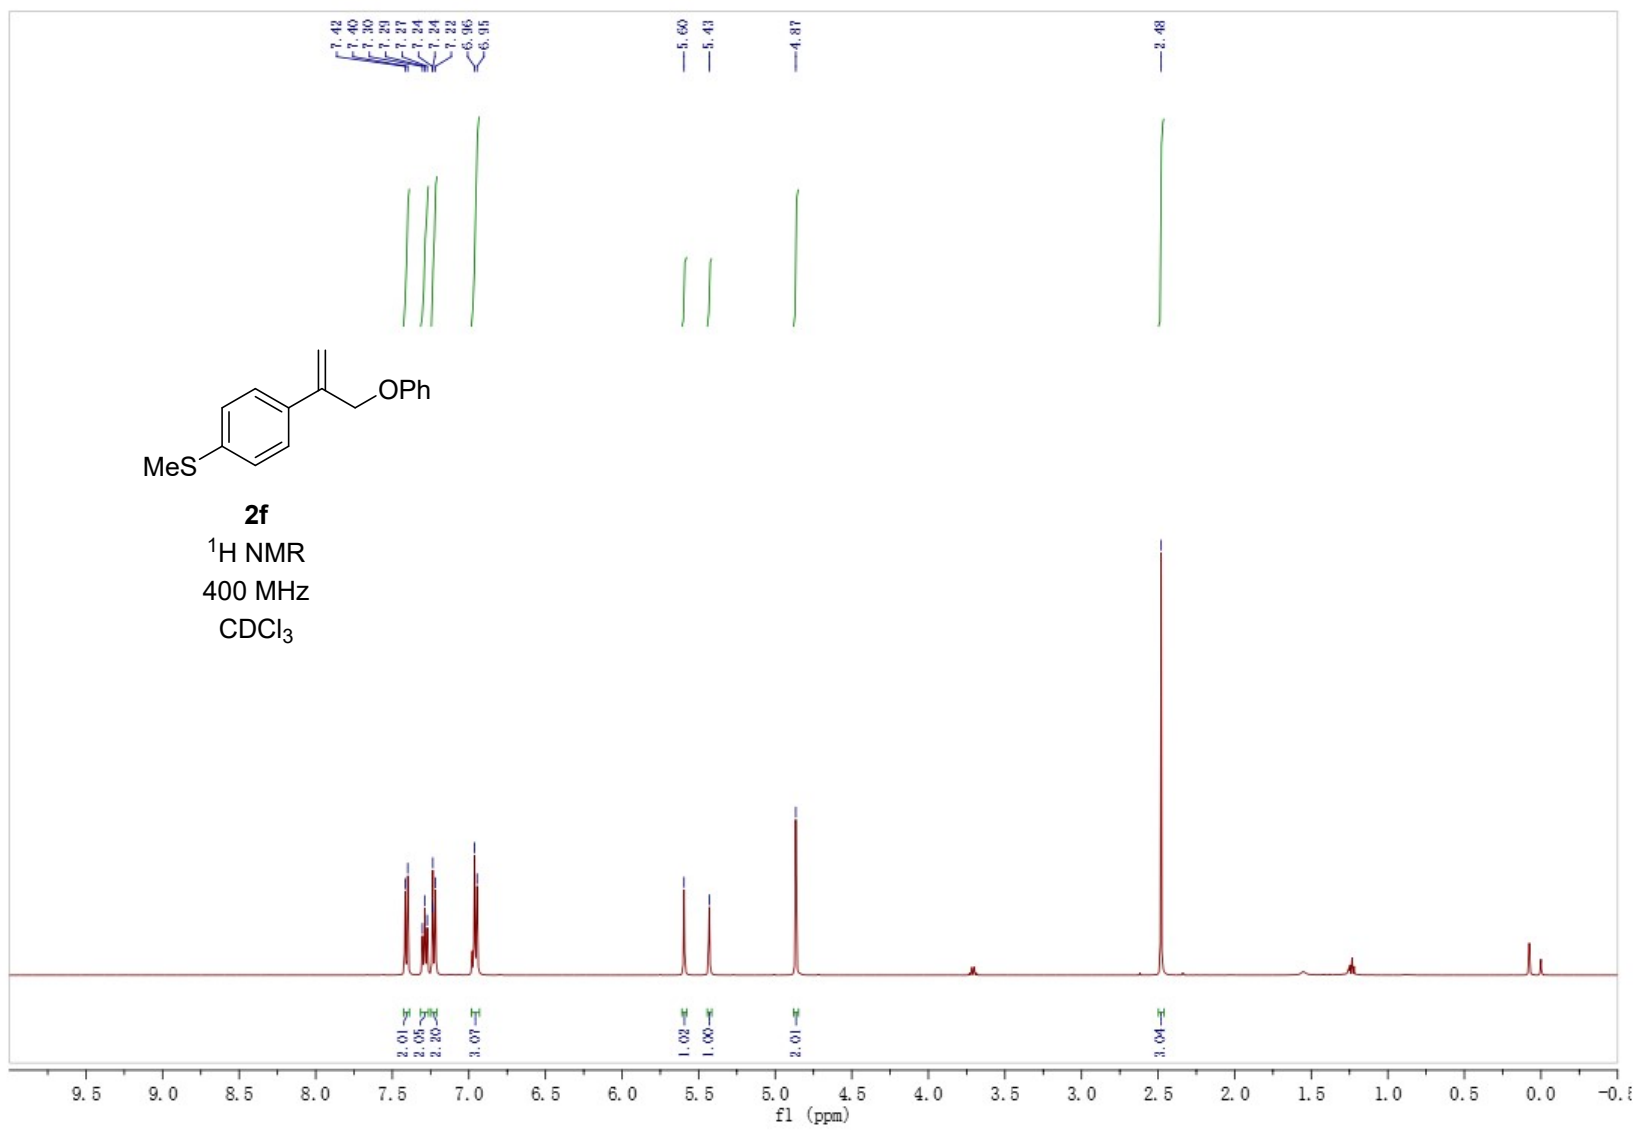

S42

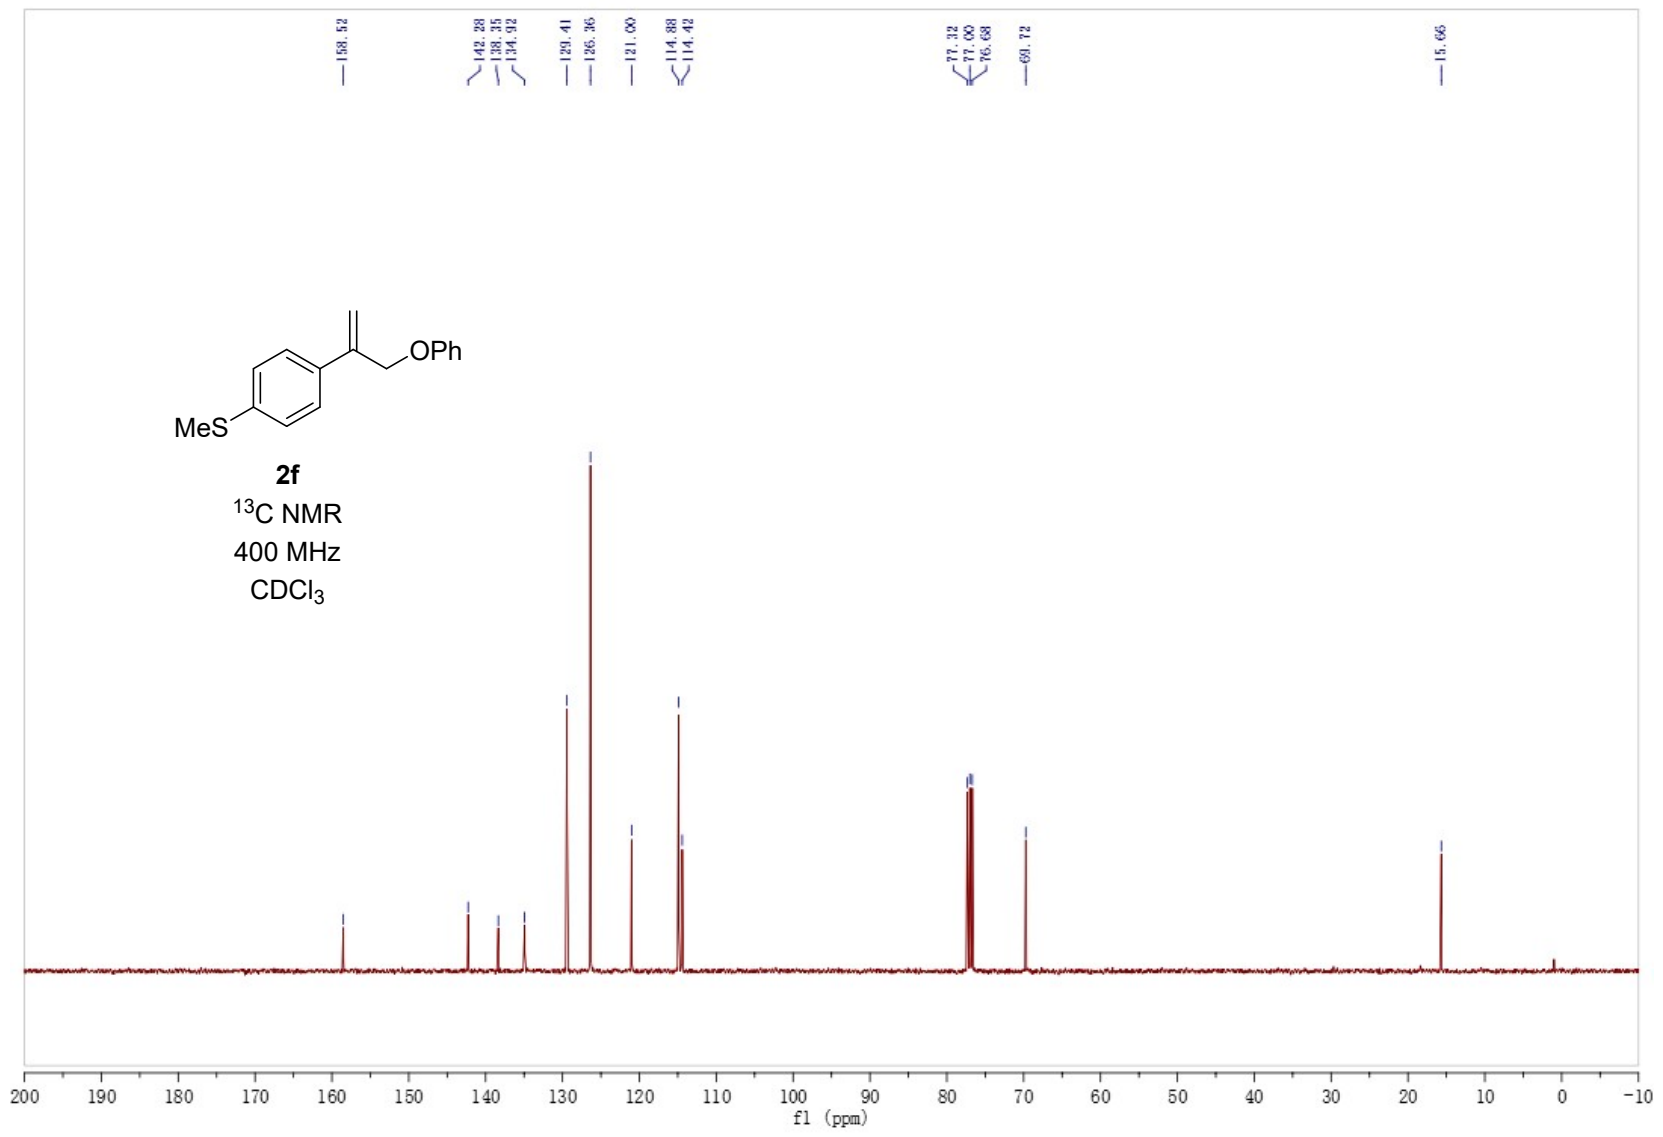

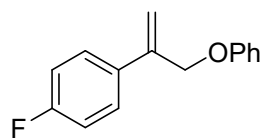

**1g**

<sup>1</sup>H NMR

500 MHz

CDCl<sub>3</sub>

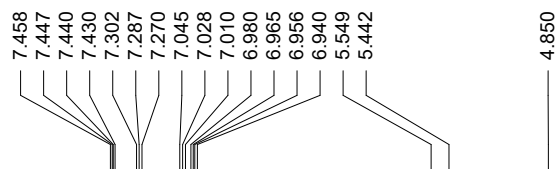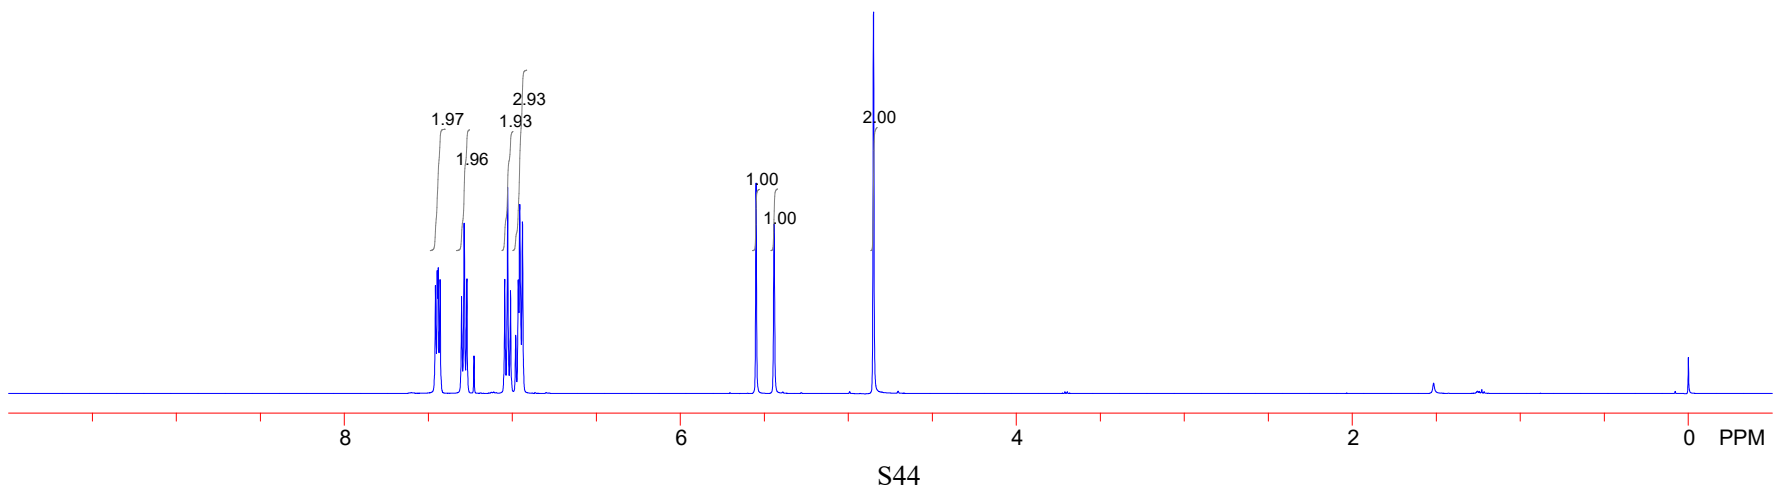

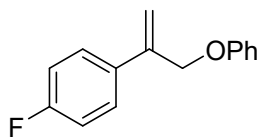

**1g**

<sup>13</sup>C NMR

500 MHz

CDCl<sub>3</sub>

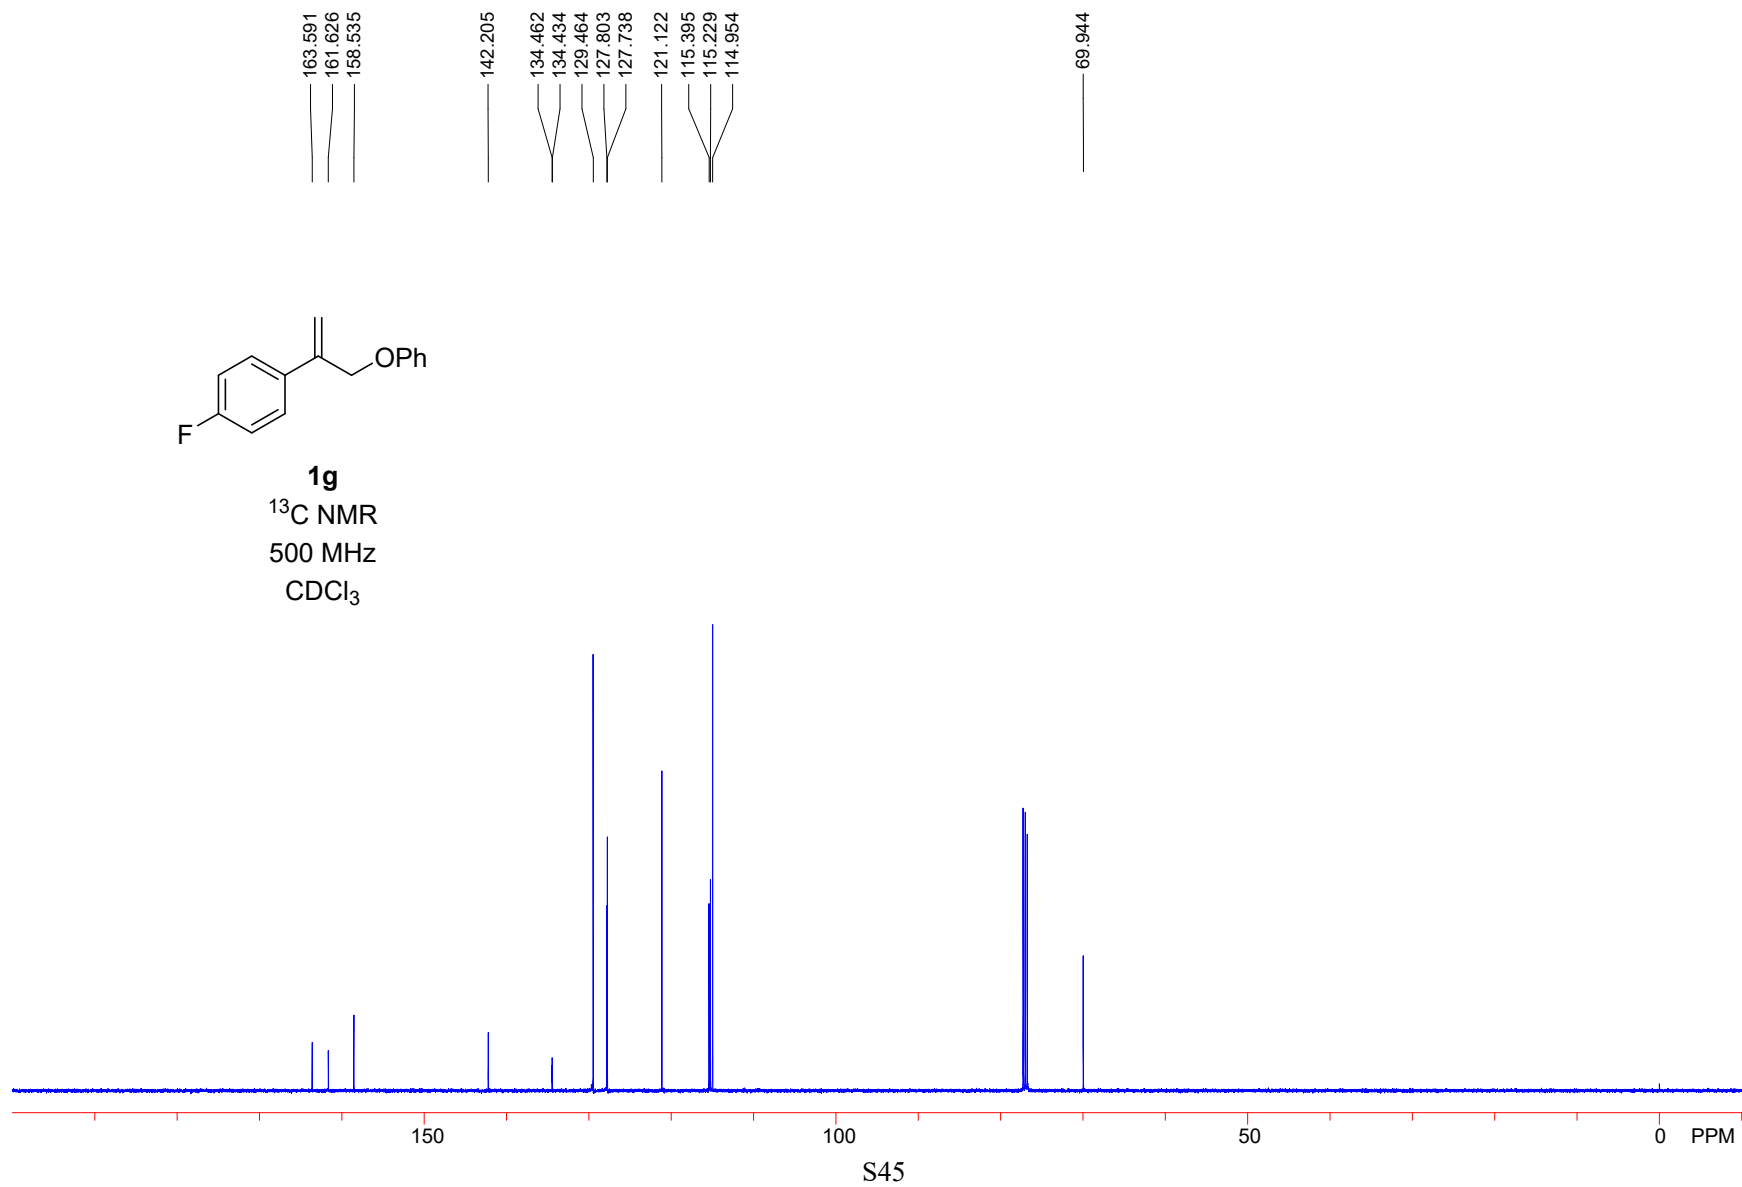

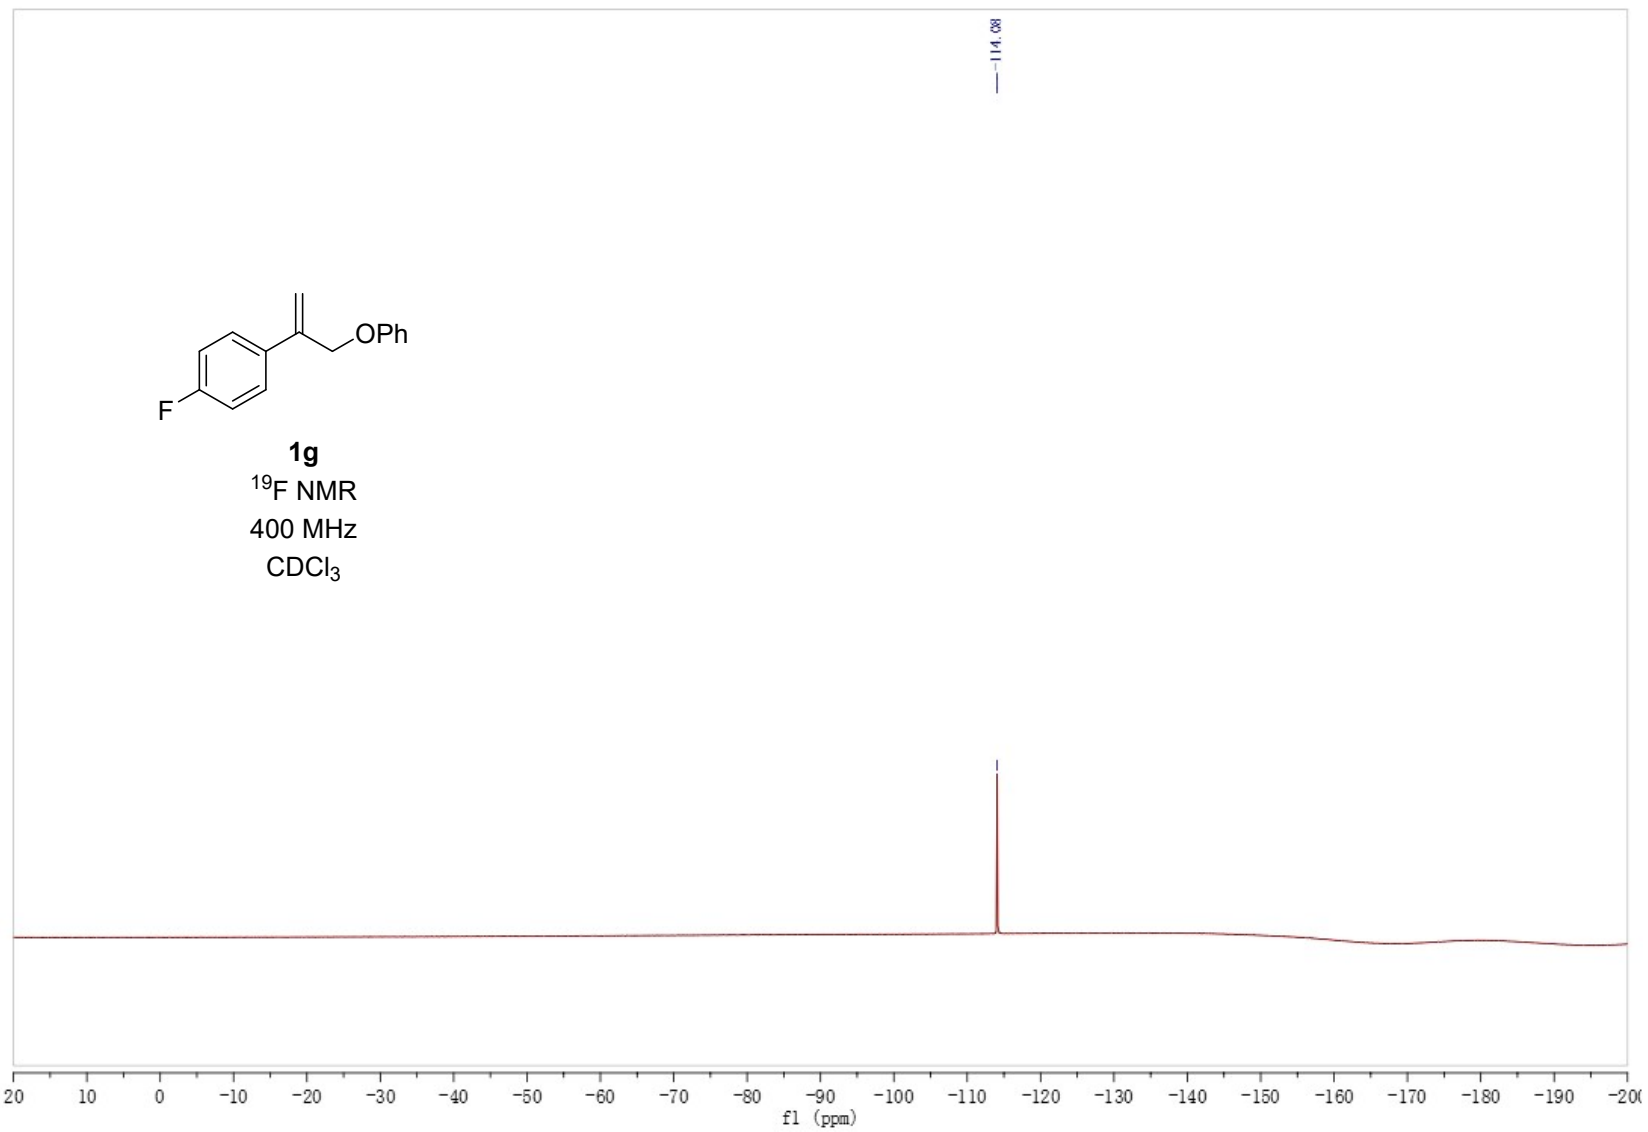

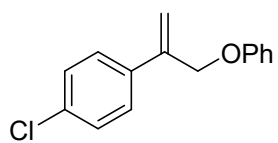

**1h**

<sup>1</sup>H NMR  
500 MHz  
CDCl<sub>3</sub>

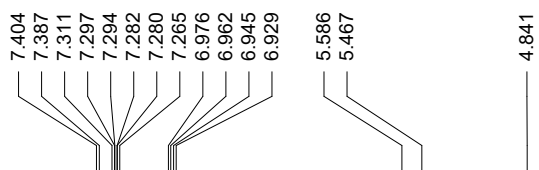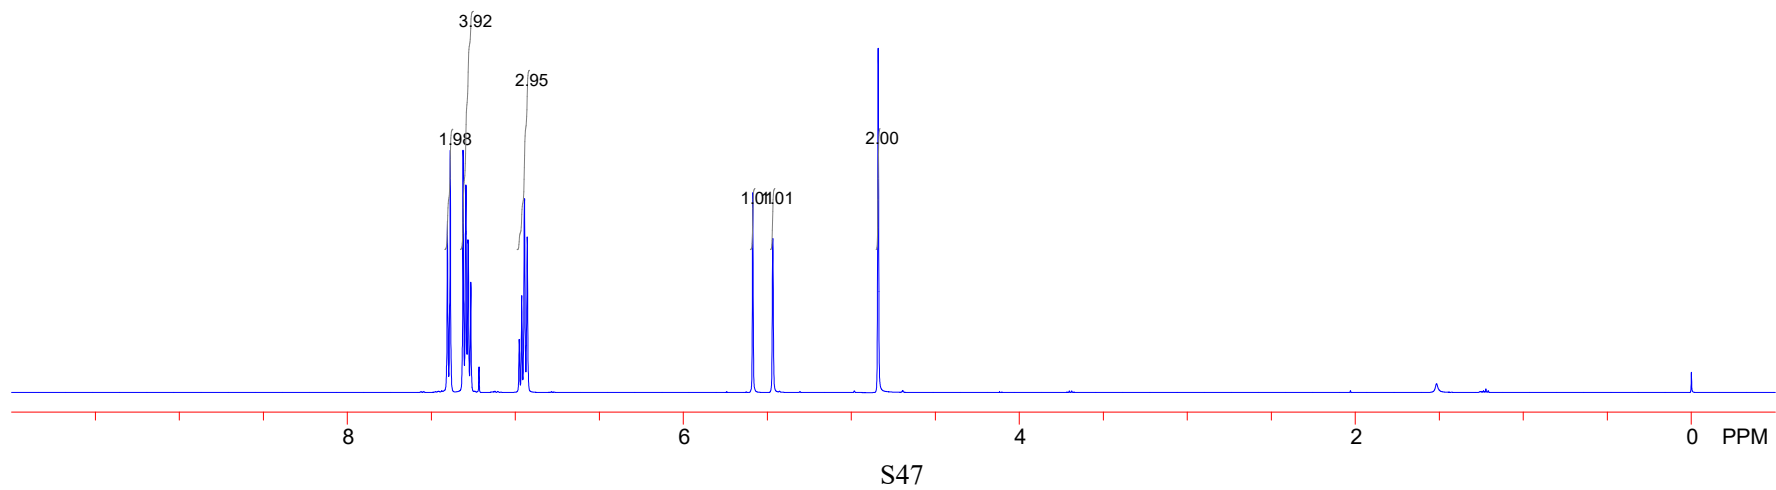

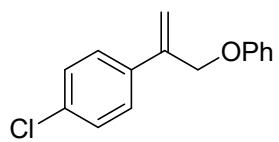

**1h**

$^{13}\text{C}$  NMR

500 MHz

$\text{CDCl}_3$

158.477

142.126

136.759

133.834

129.464

128.598

127.384

121.151

115.547

114.940

77.253

77.000

76.747

69.756

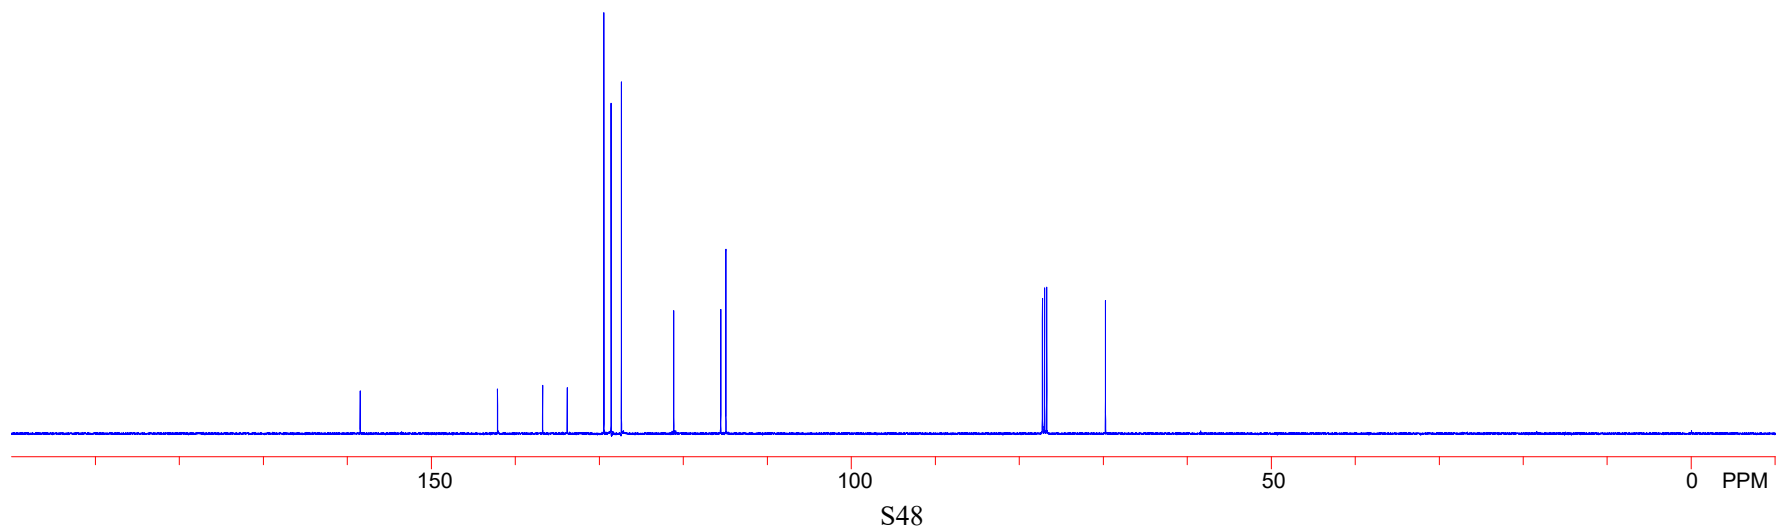



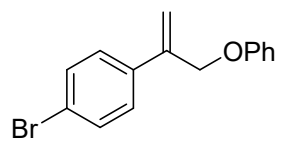

**1i**  
<sup>1</sup>H NMR  
500 MHz  
CDCl<sub>3</sub>

7.460  
7.440  
7.333  
7.313  
7.289  
7.272  
7.253  
6.971  
6.951  
6.937  
6.918

5.582  
5.466

4.831

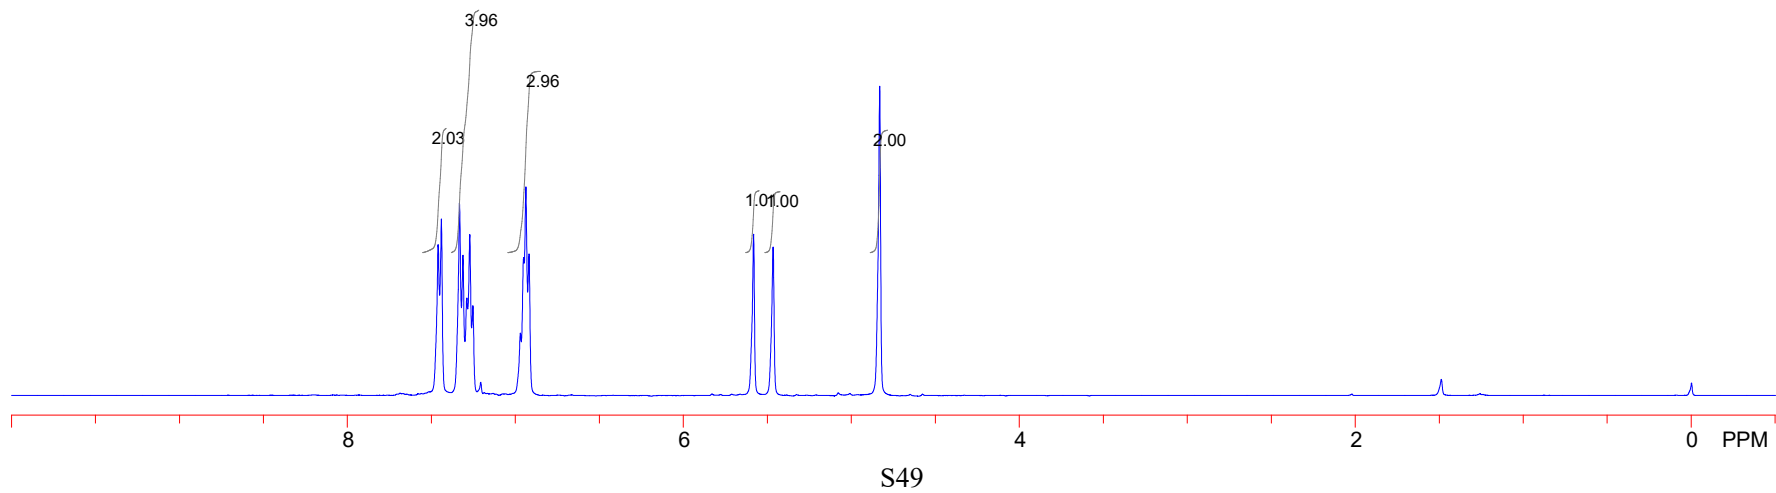

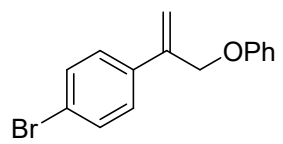

**1i**  
 $^{13}\text{C}$  NMR  
500 MHz  
 $\text{CDCl}_3$

158.456

142.169

137.214

131.552

129.457

127.702

122.004

121.151

115.619

114.933

77.253

77.000

76.747

69.676

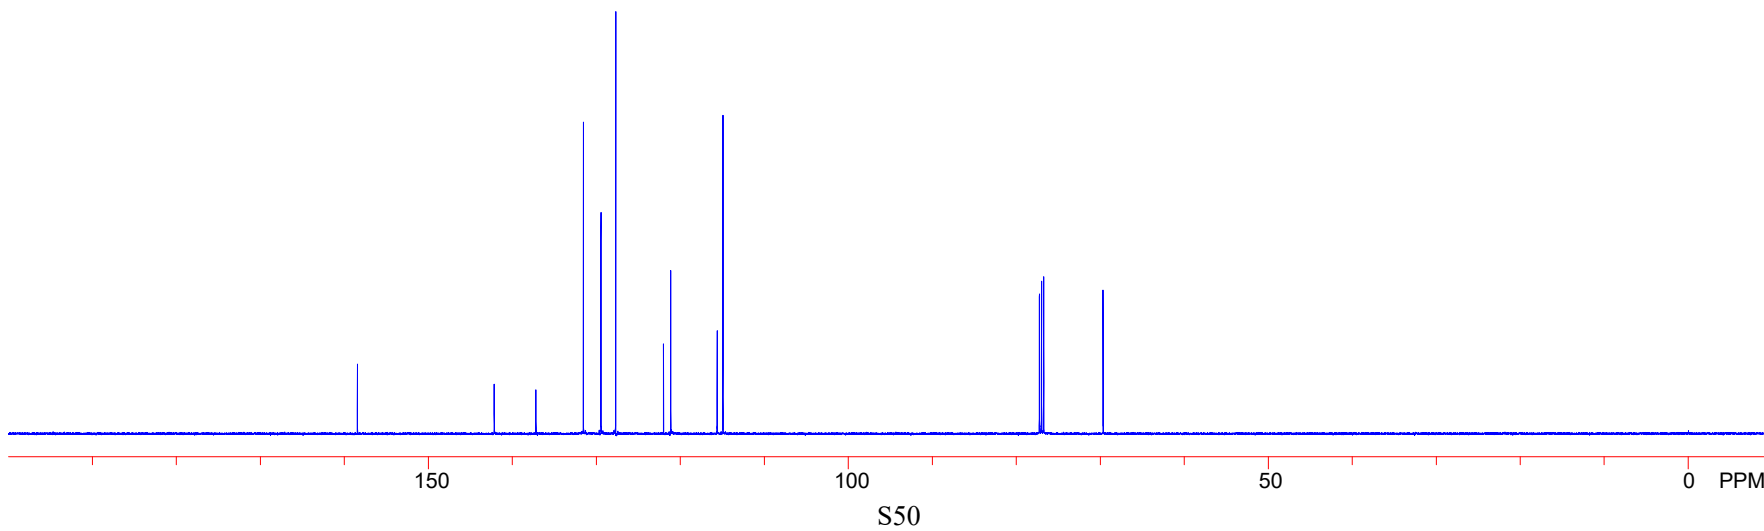

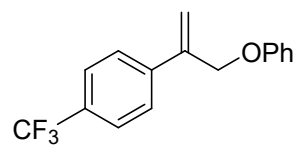

**1j**

<sup>1</sup>H NMR  
500 MHz  
CDCl<sub>3</sub>

7.616  
7.601  
7.591  
7.575  
7.311  
7.297  
7.282  
7.250  
6.995  
6.980  
6.959  
6.943

5.685  
5.576

4.898

1.533

0.001

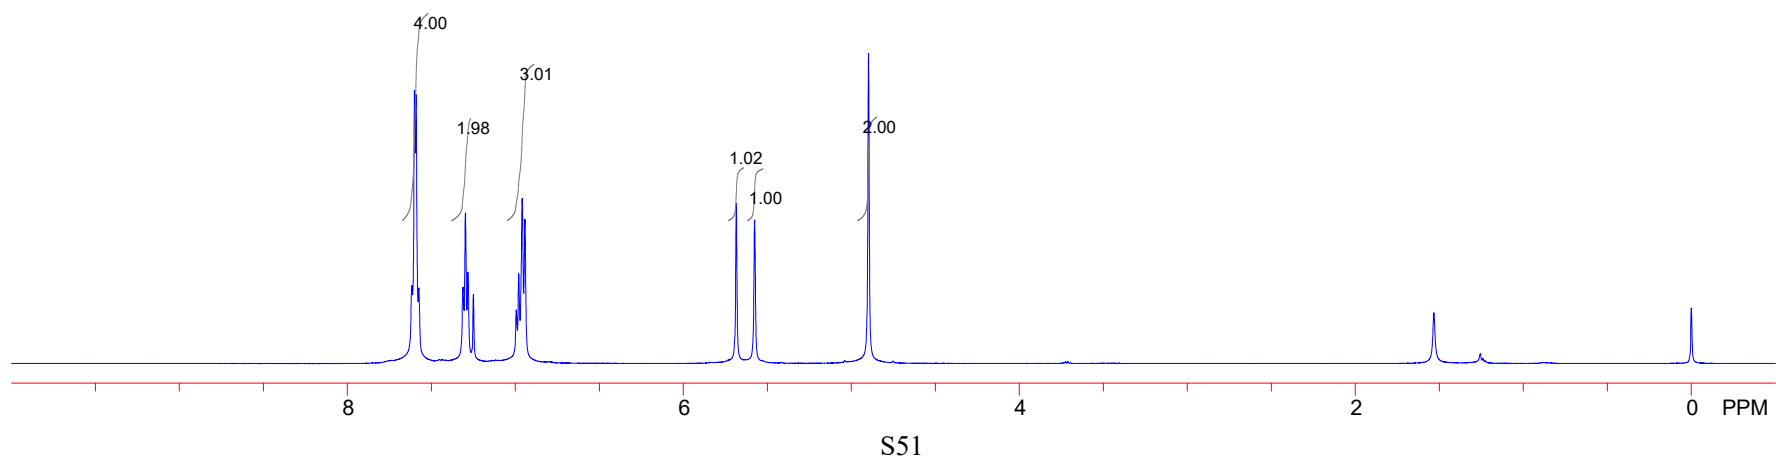

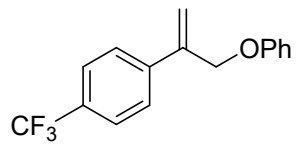

**1j**

<sup>13</sup>C NMR

500 MHz

CDCl<sub>3</sub>

158.448

142.289

141.931

130.136

129.876

129.522

126.460

125.463

125.434

125.405

125.376

123.065

121.296

117.114

114.983

77.253

77.000

76.747

76.617

69.720

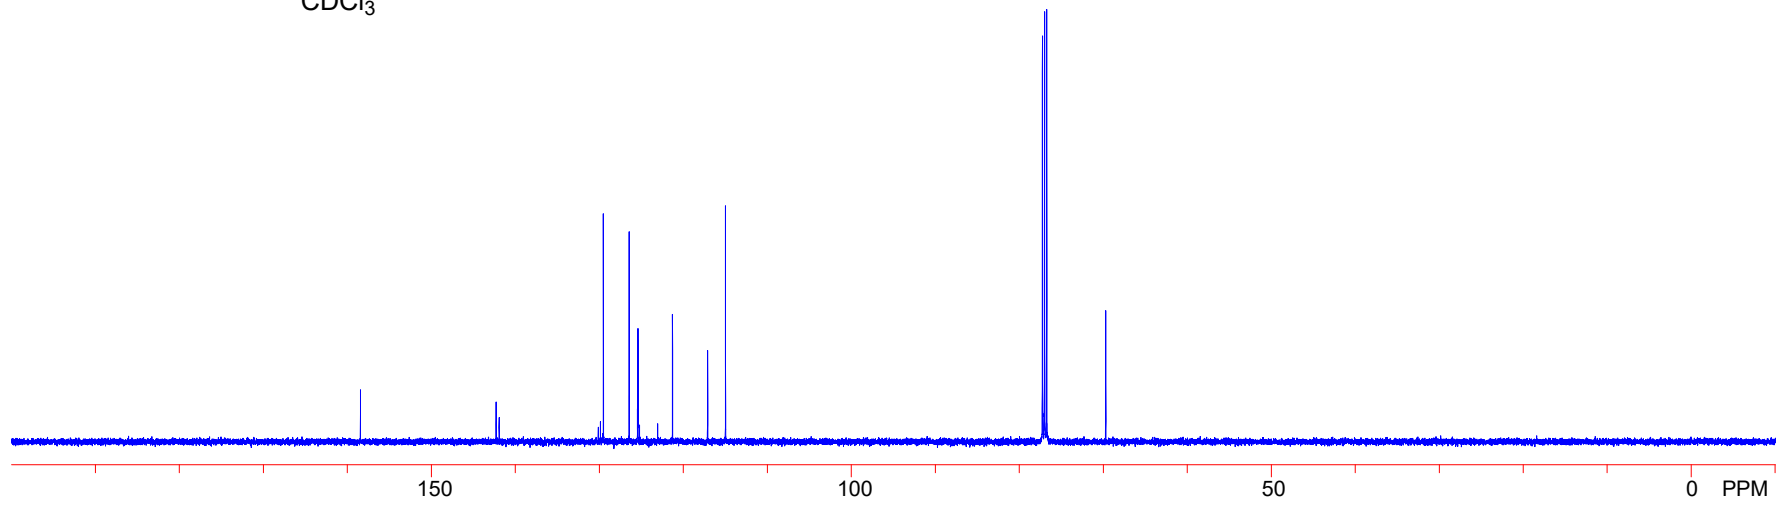

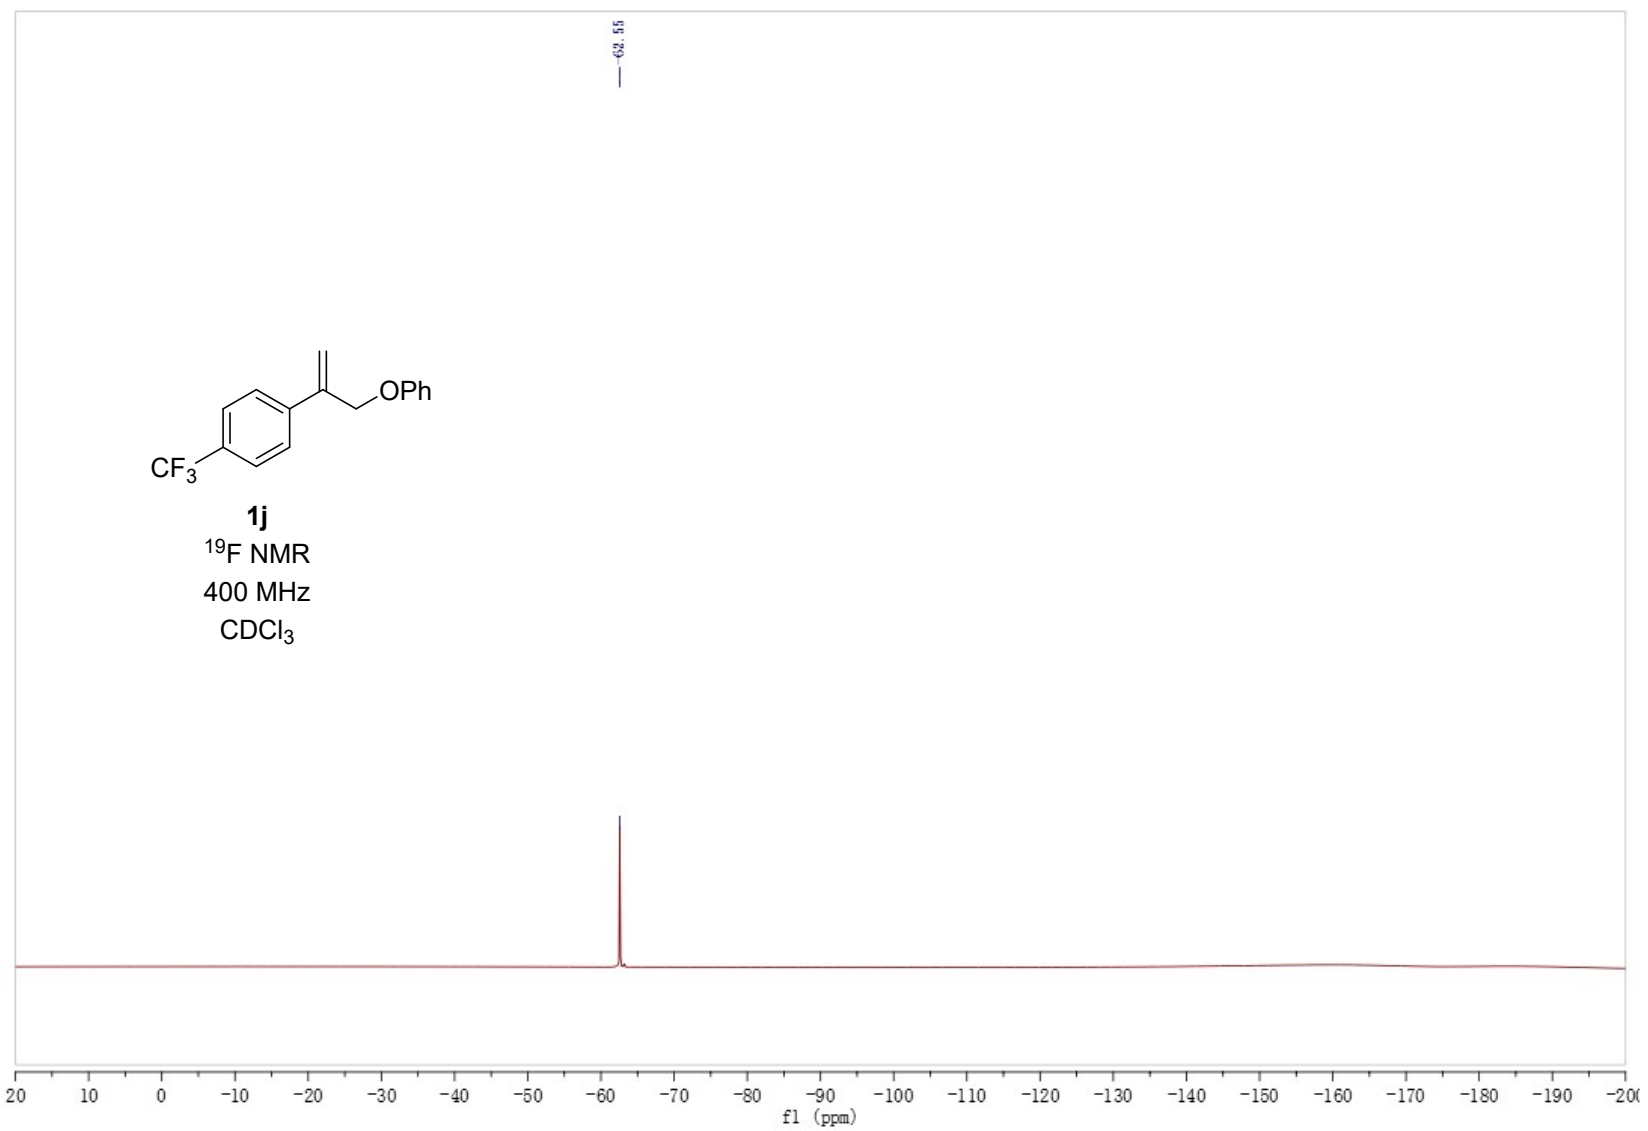

S53

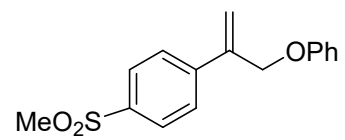

**1k**

<sup>1</sup>H NMR  
400 MHz  
CDCl<sub>3</sub>

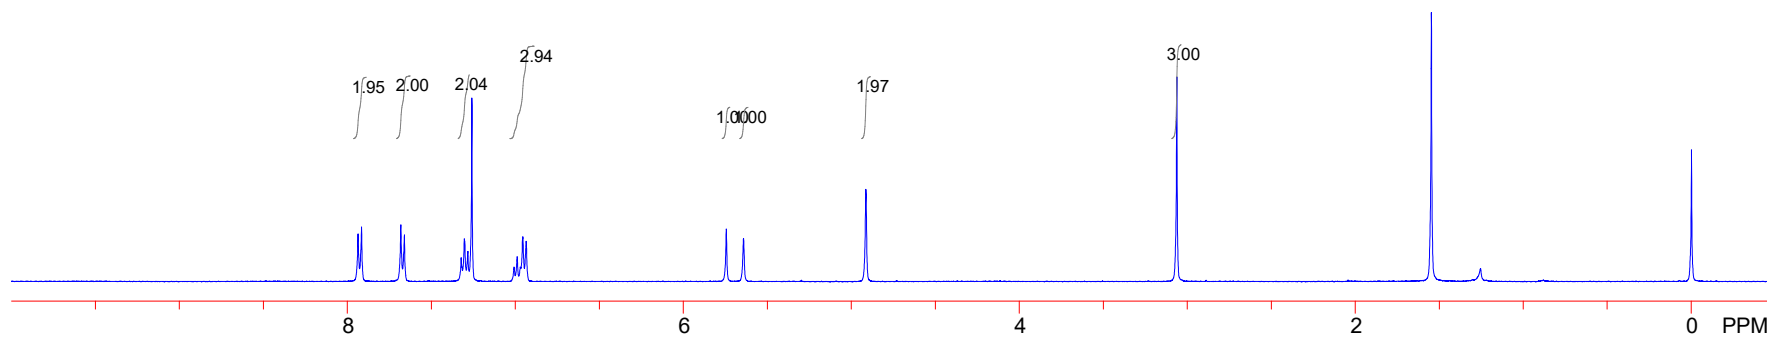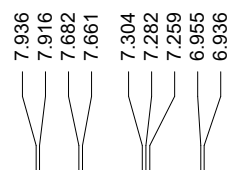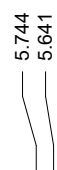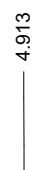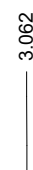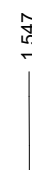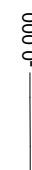

S54

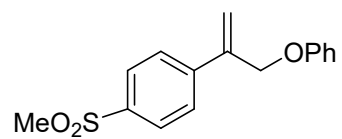

**1k**  
<sup>13</sup>C NMR  
400 MHz  
CDCl<sub>3</sub>

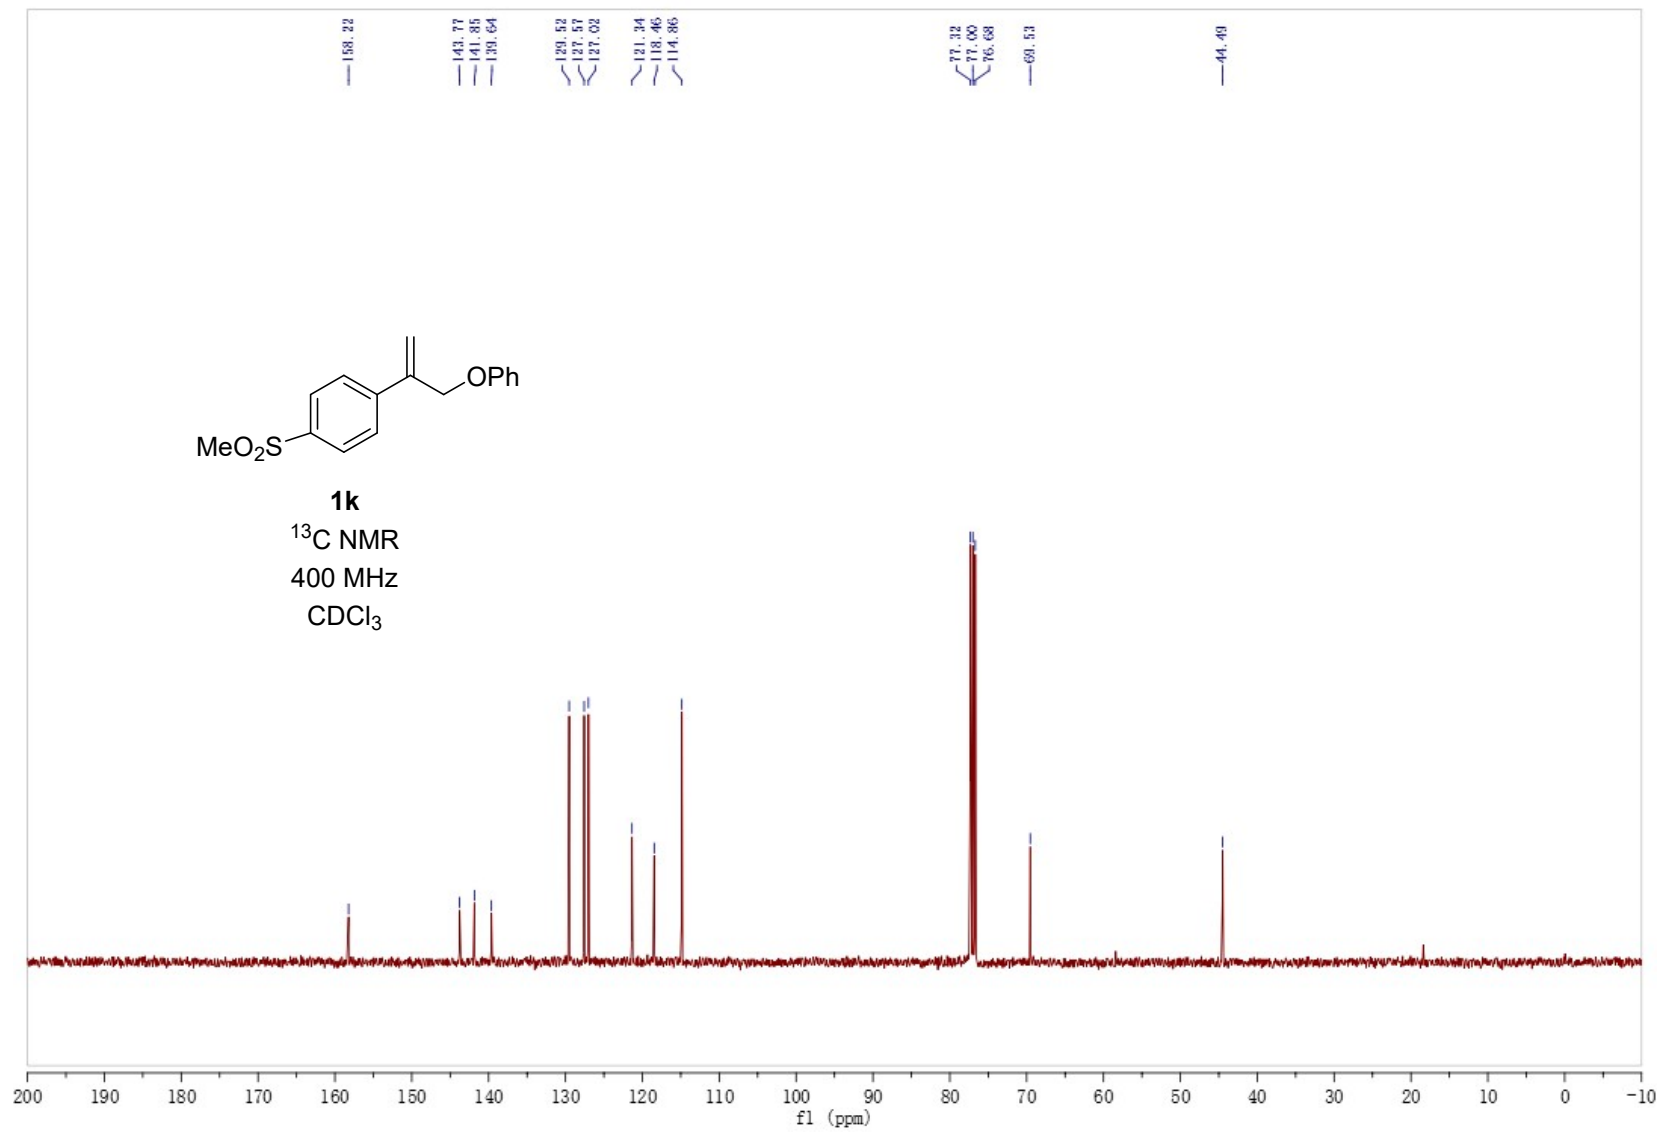

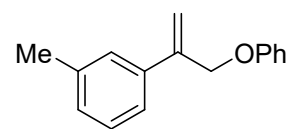

**11**  
<sup>1</sup>H NMR  
400 MHz  
CDCl<sub>3</sub>

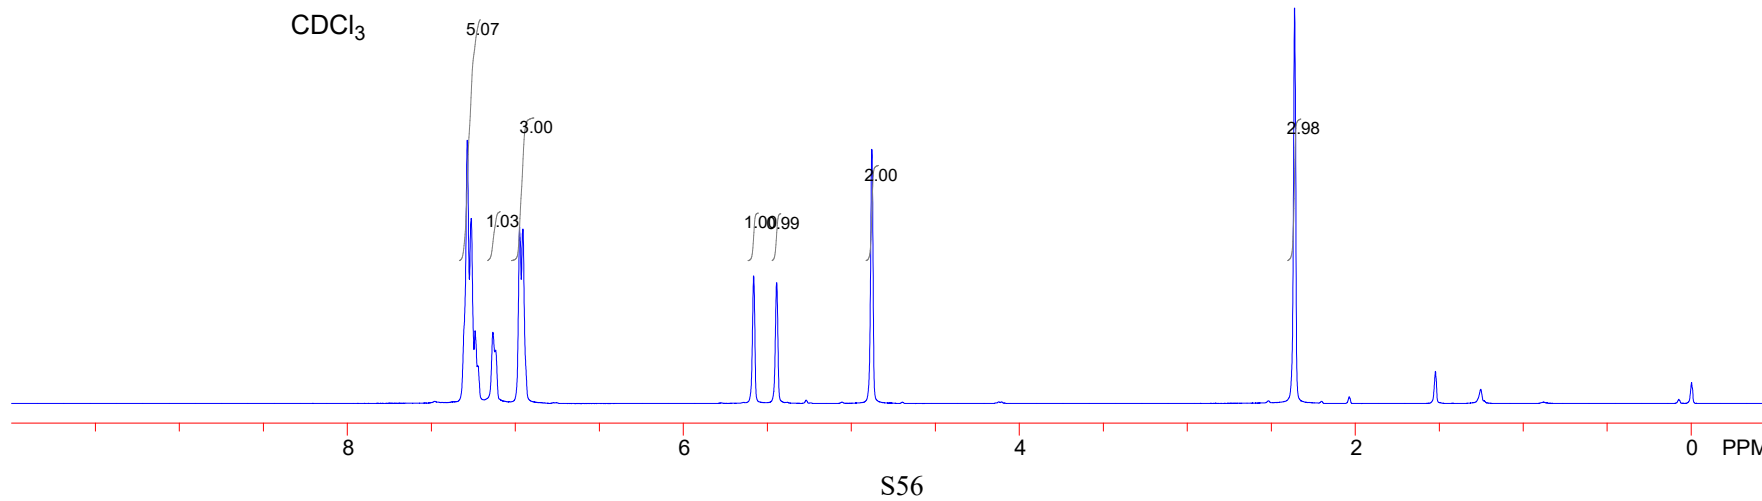



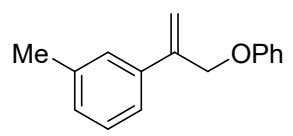

**11**

<sup>13</sup>C NMR  
400 MHz  
CDCl<sub>3</sub>

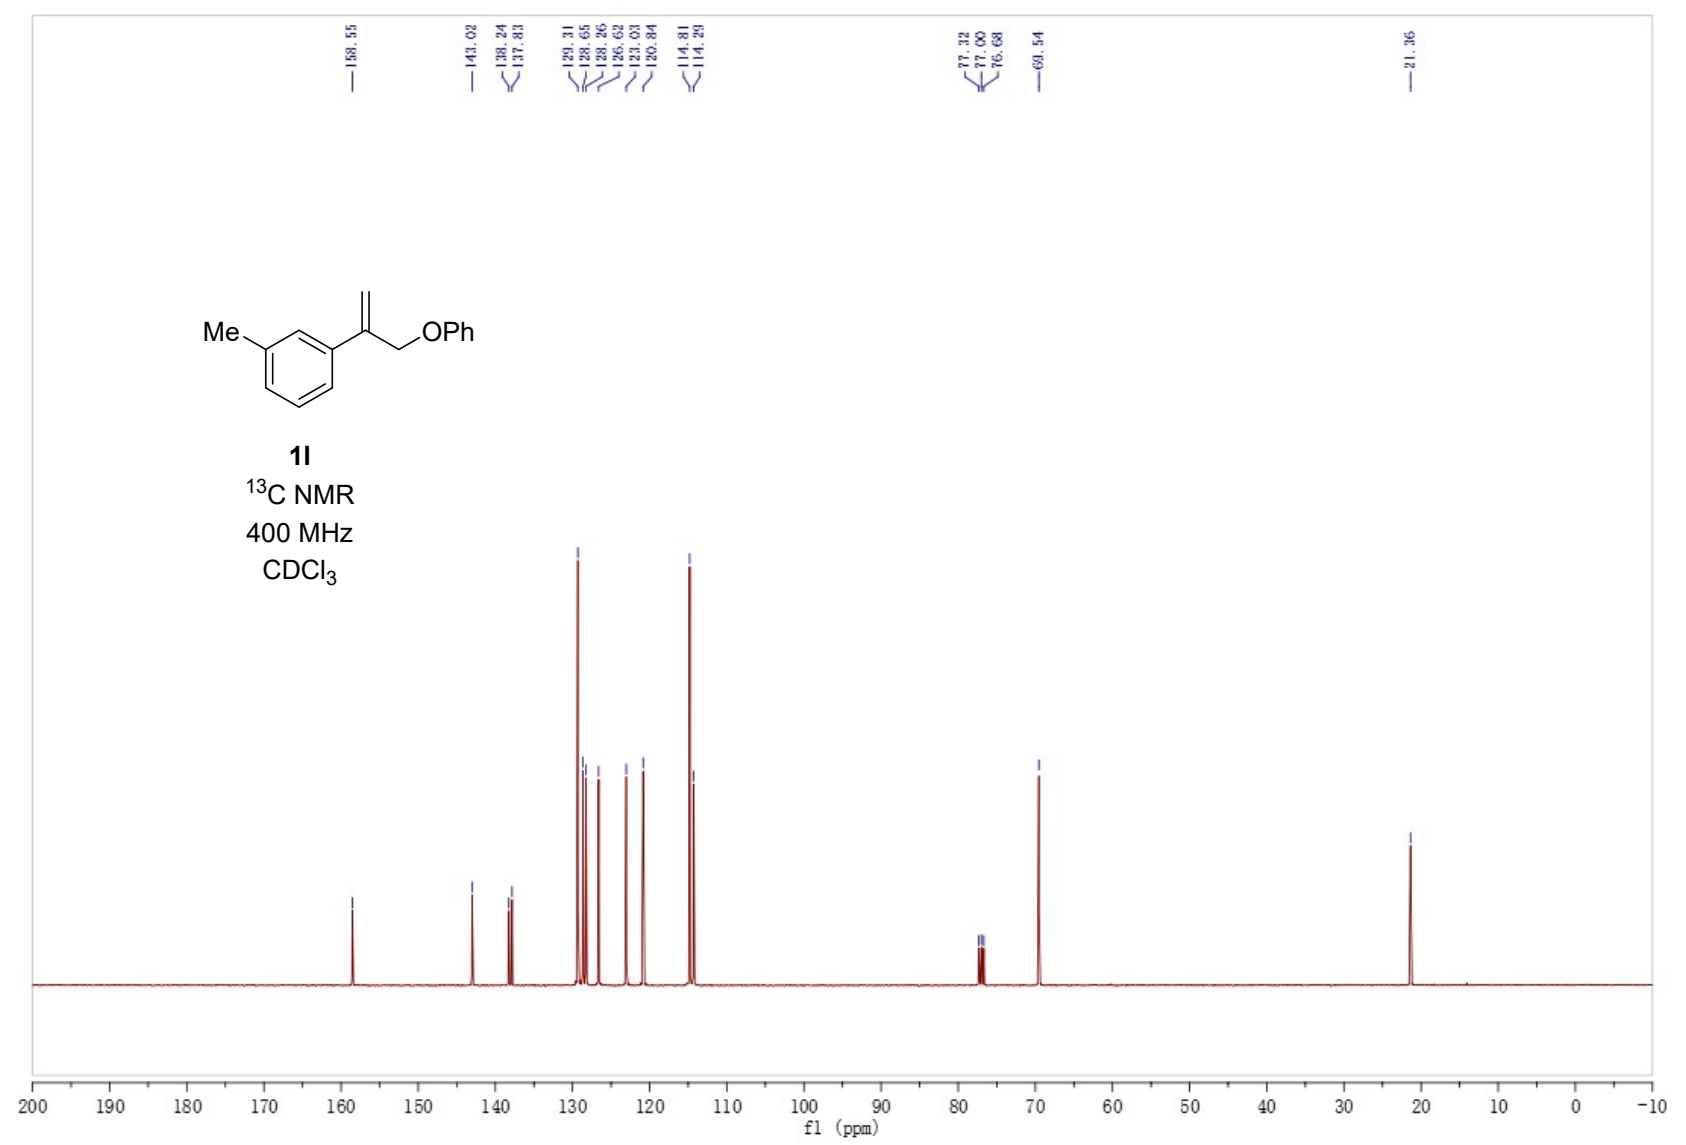

S5/

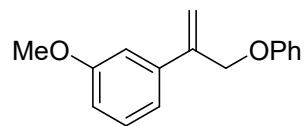

**1m**

<sup>1</sup>H NMR

500 MHz

CDCl<sub>3</sub>

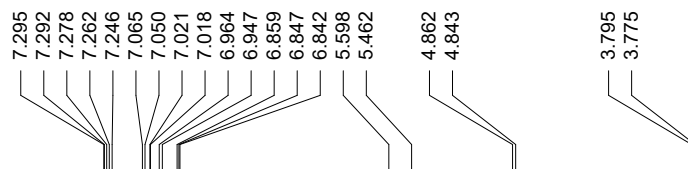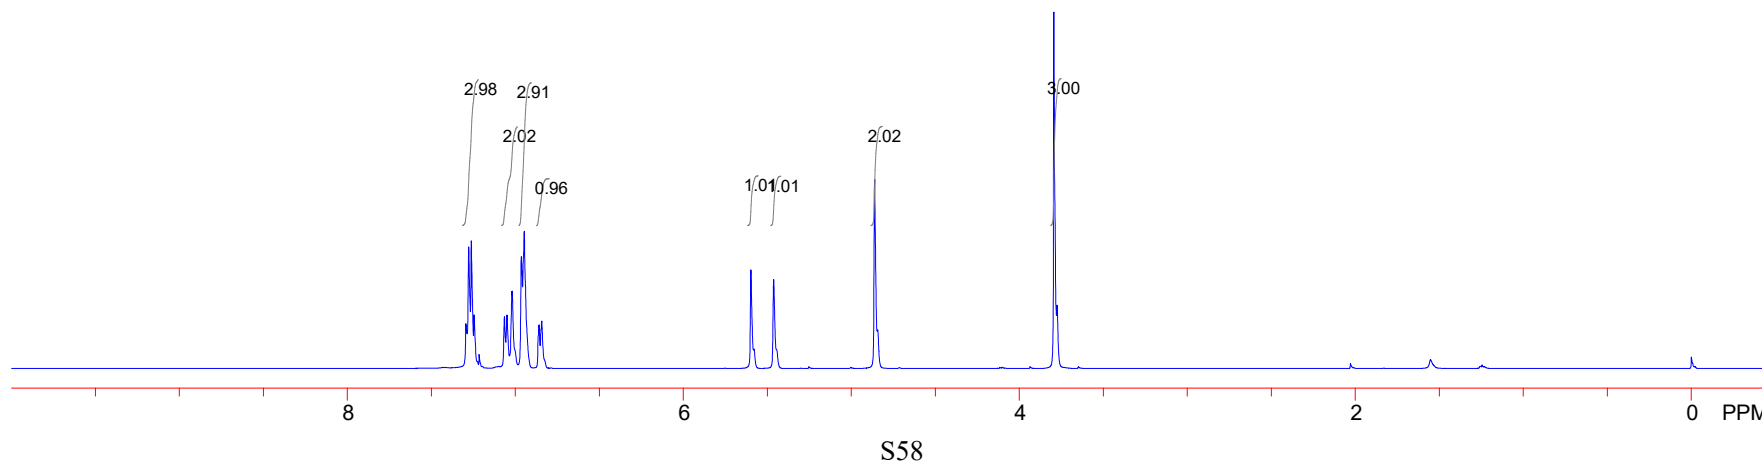

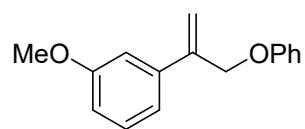

**1m**

<sup>13</sup>C NMR

500 MHz

CDCl<sub>3</sub>

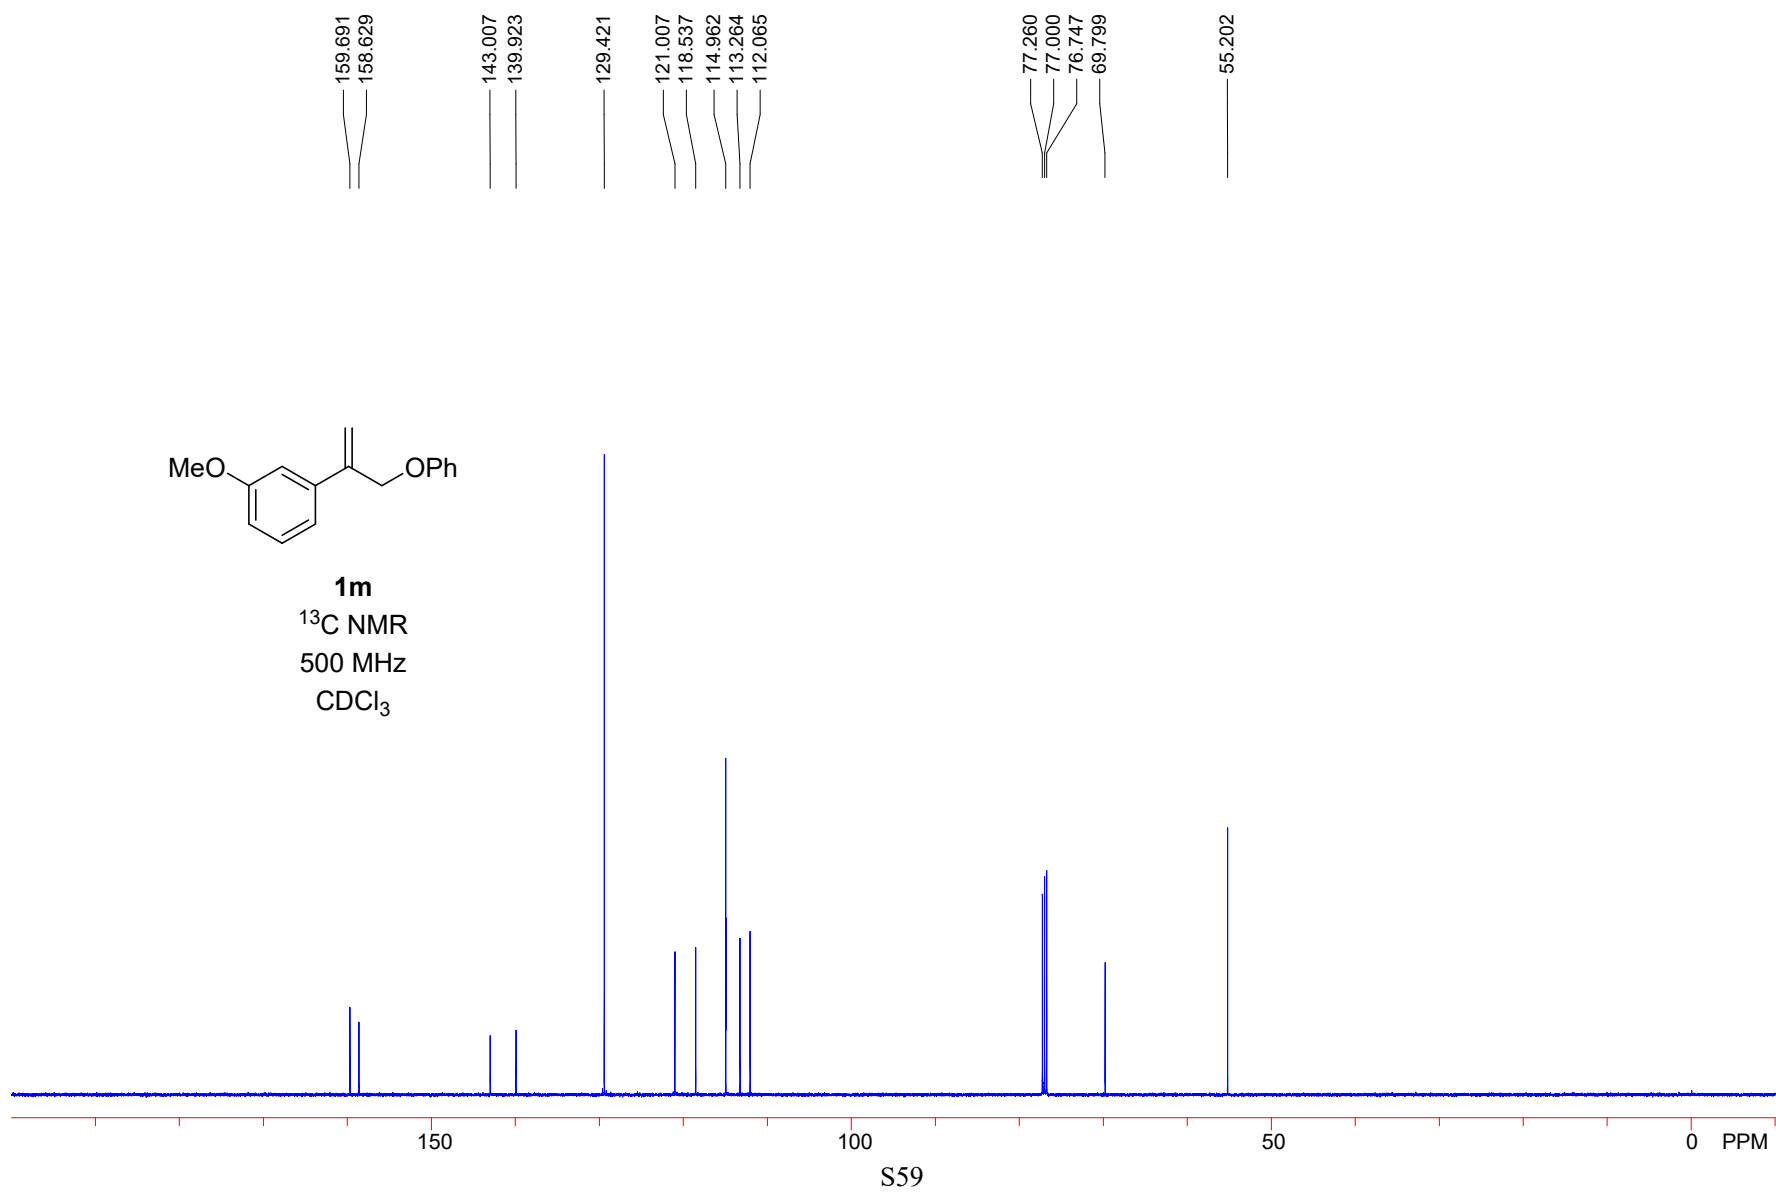

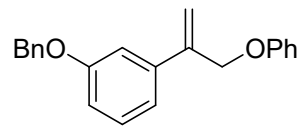

**1n**

<sup>1</sup>H NMR  
400 MHz  
CDCl<sub>3</sub>

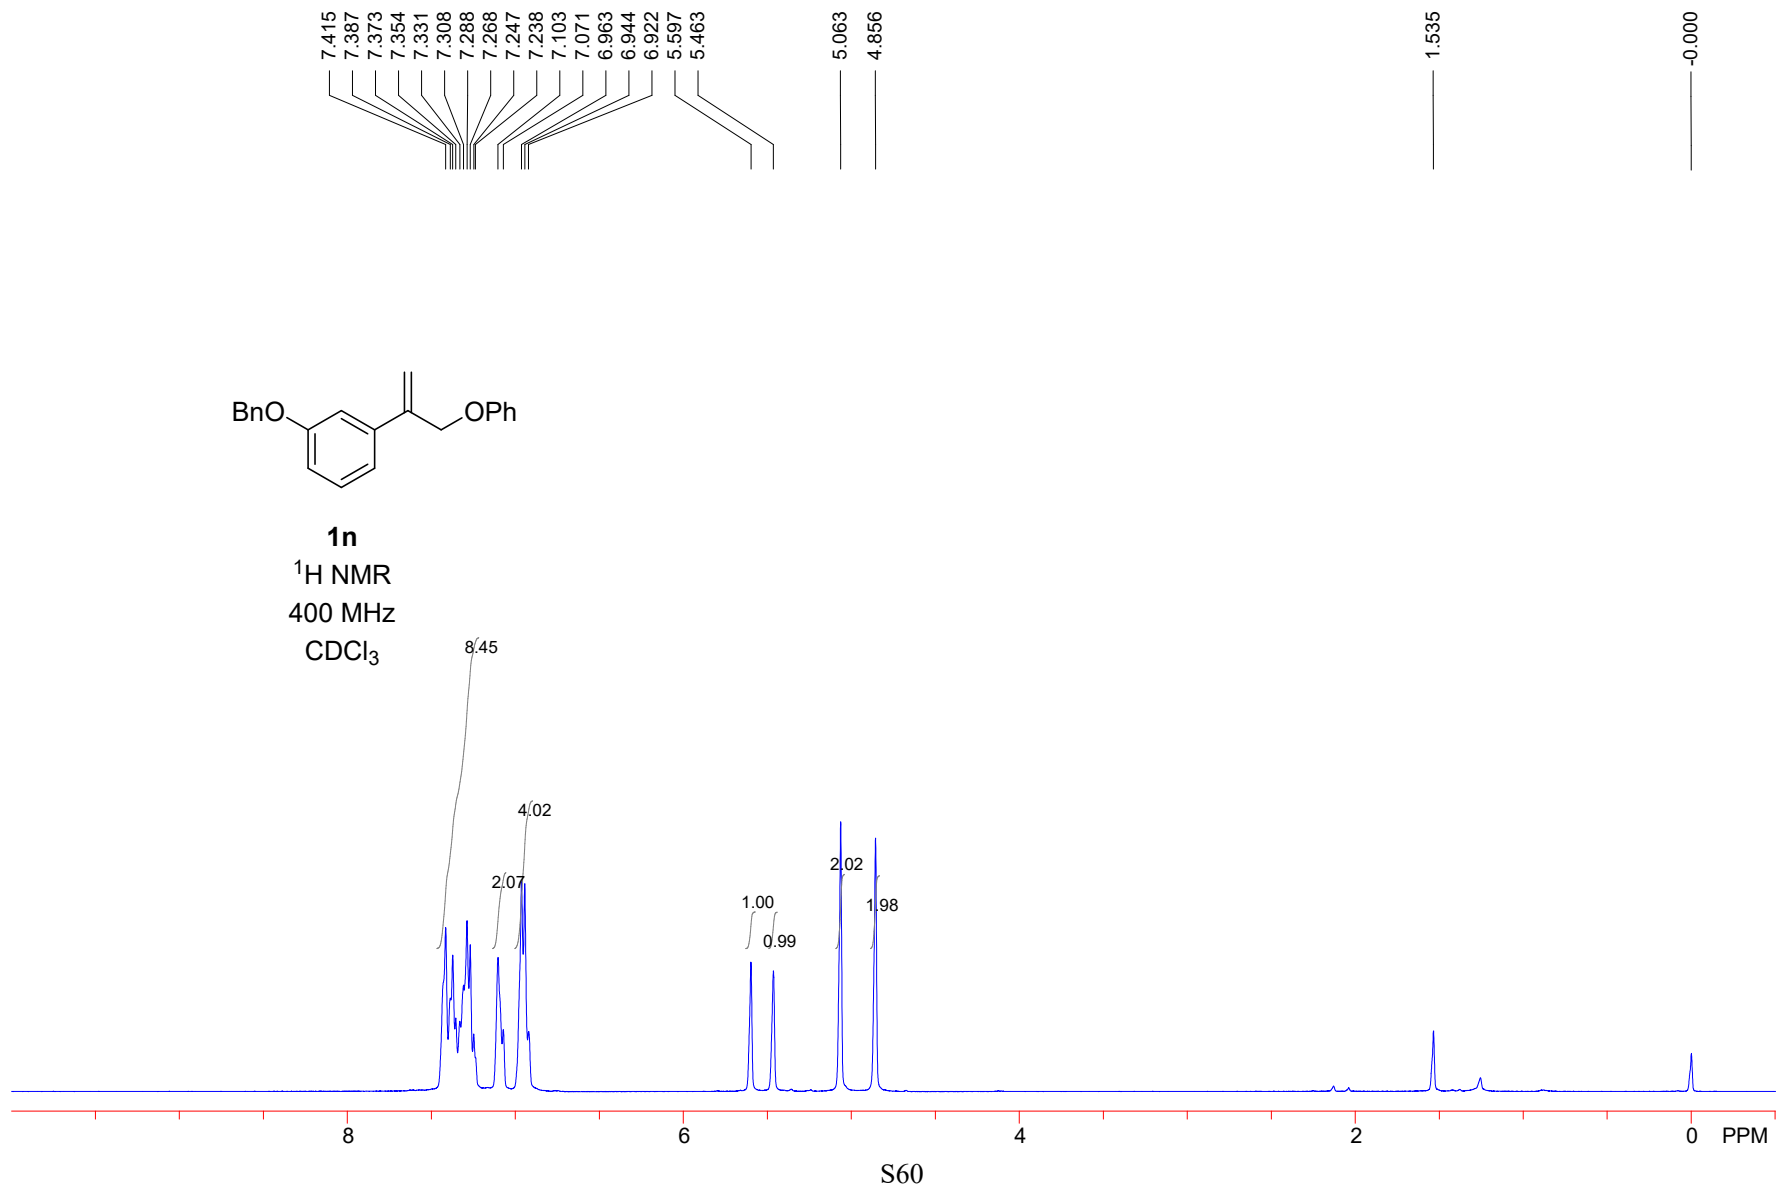

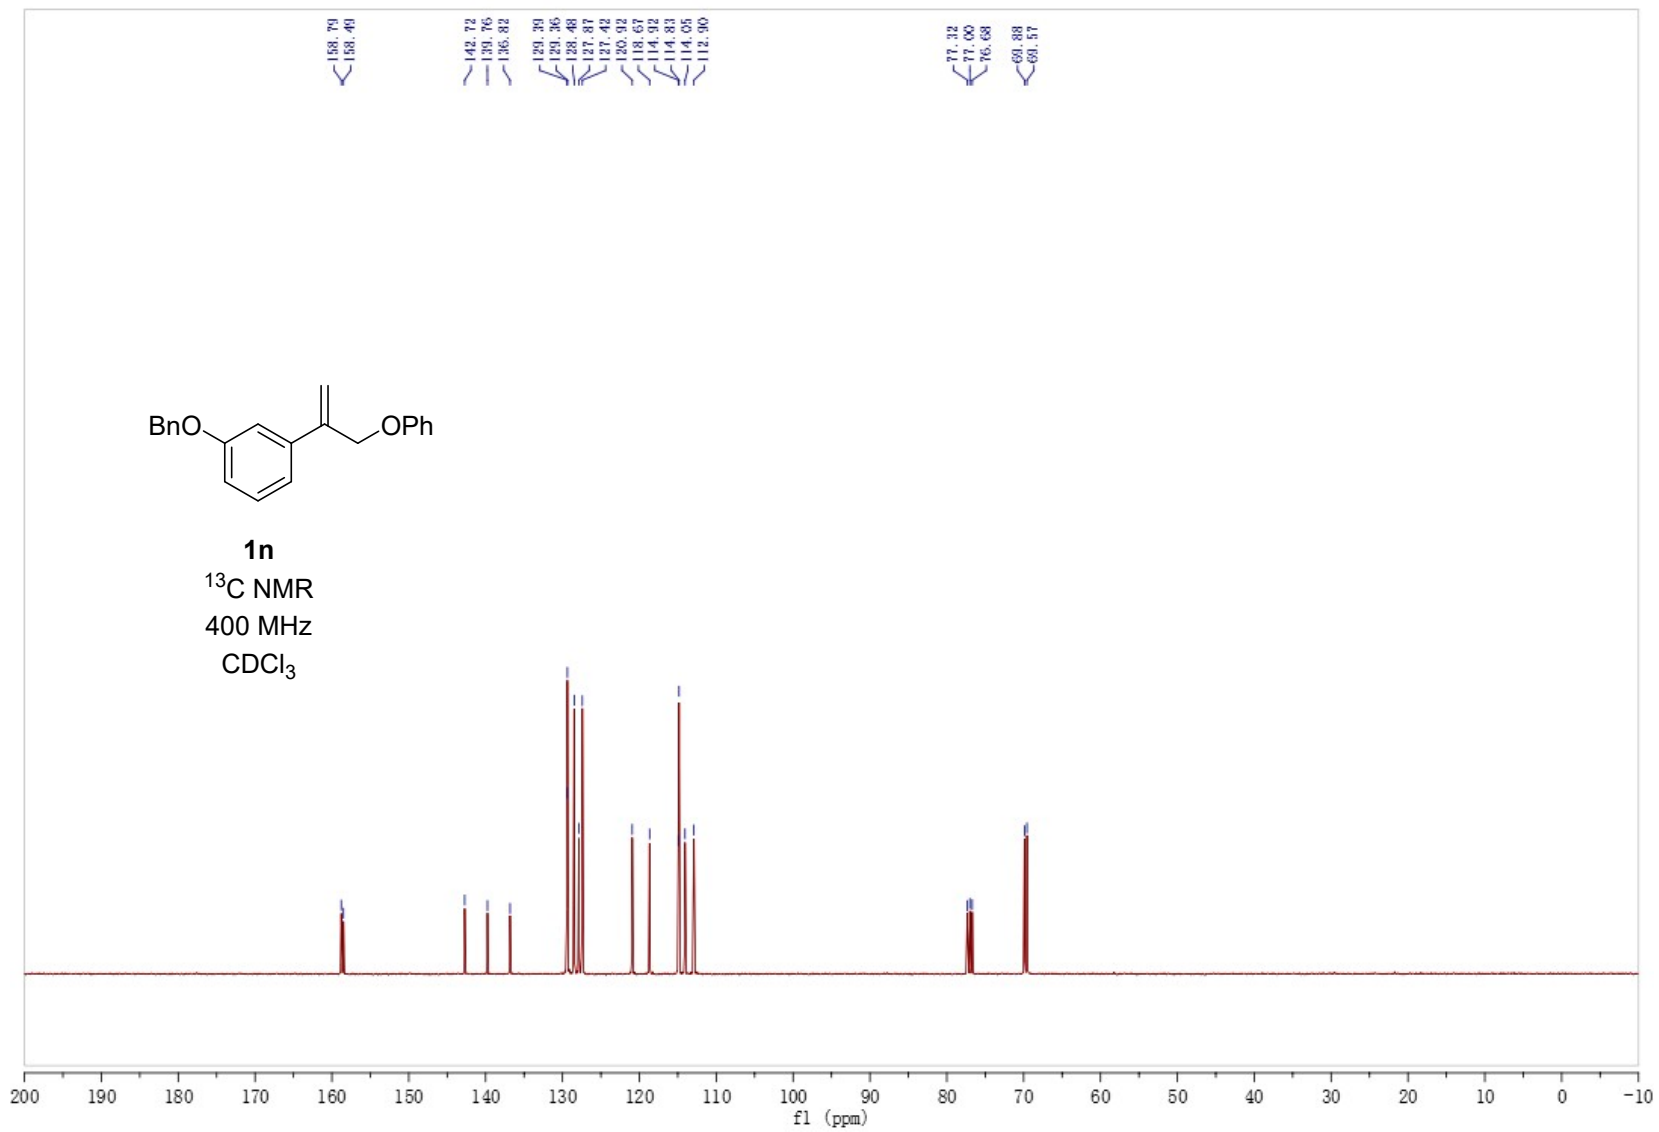

7.301  
7.292  
7.286  
7.285  
7.277  
7.269  
7.253  
7.237  
7.226  
7.191  
7.170  
7.011  
7.008  
6.995  
6.992  
6.979  
6.963  
6.957  
6.941  
5.622  
5.502  
4.851

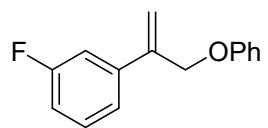

**1o**

<sup>1</sup>H NMR  
500 MHz  
CDCl<sub>3</sub>

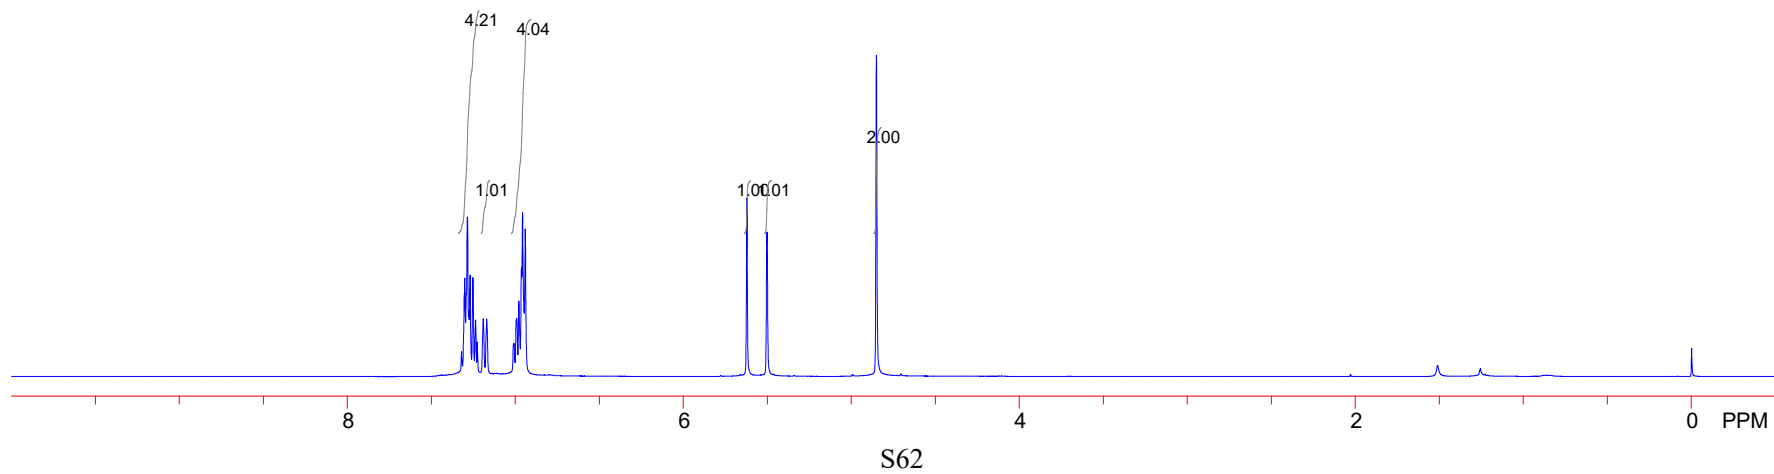



**1o**

<sup>13</sup>C NMR  
500 MHz  
CDCl<sub>3</sub>

163.945  
161.995  
158.550

142.248  
140.753

129.934  
129.869  
129.486  
121.751  
121.722  
121.202  
116.009  
115.019  
114.868  
114.702  
113.221  
113.040

77.260  
77.000  
76.747  
69.756

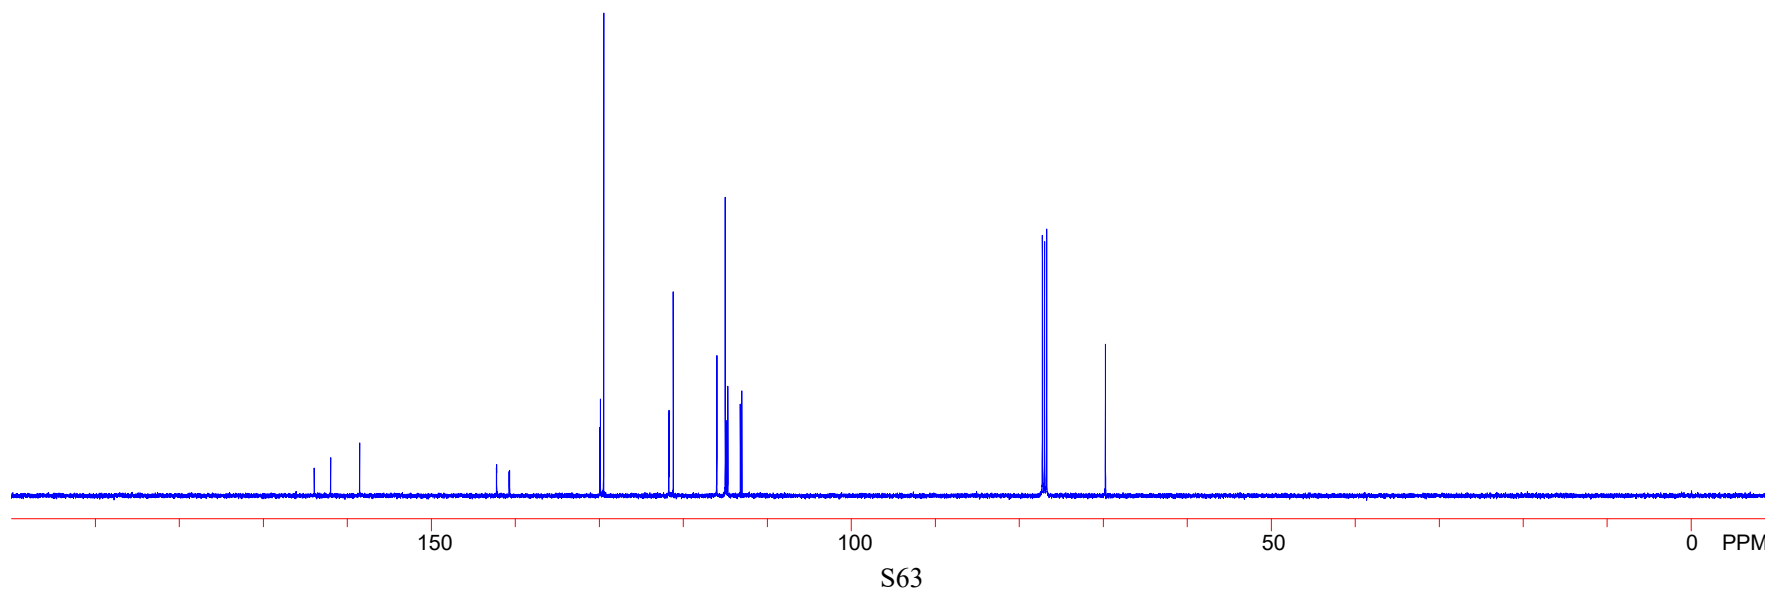

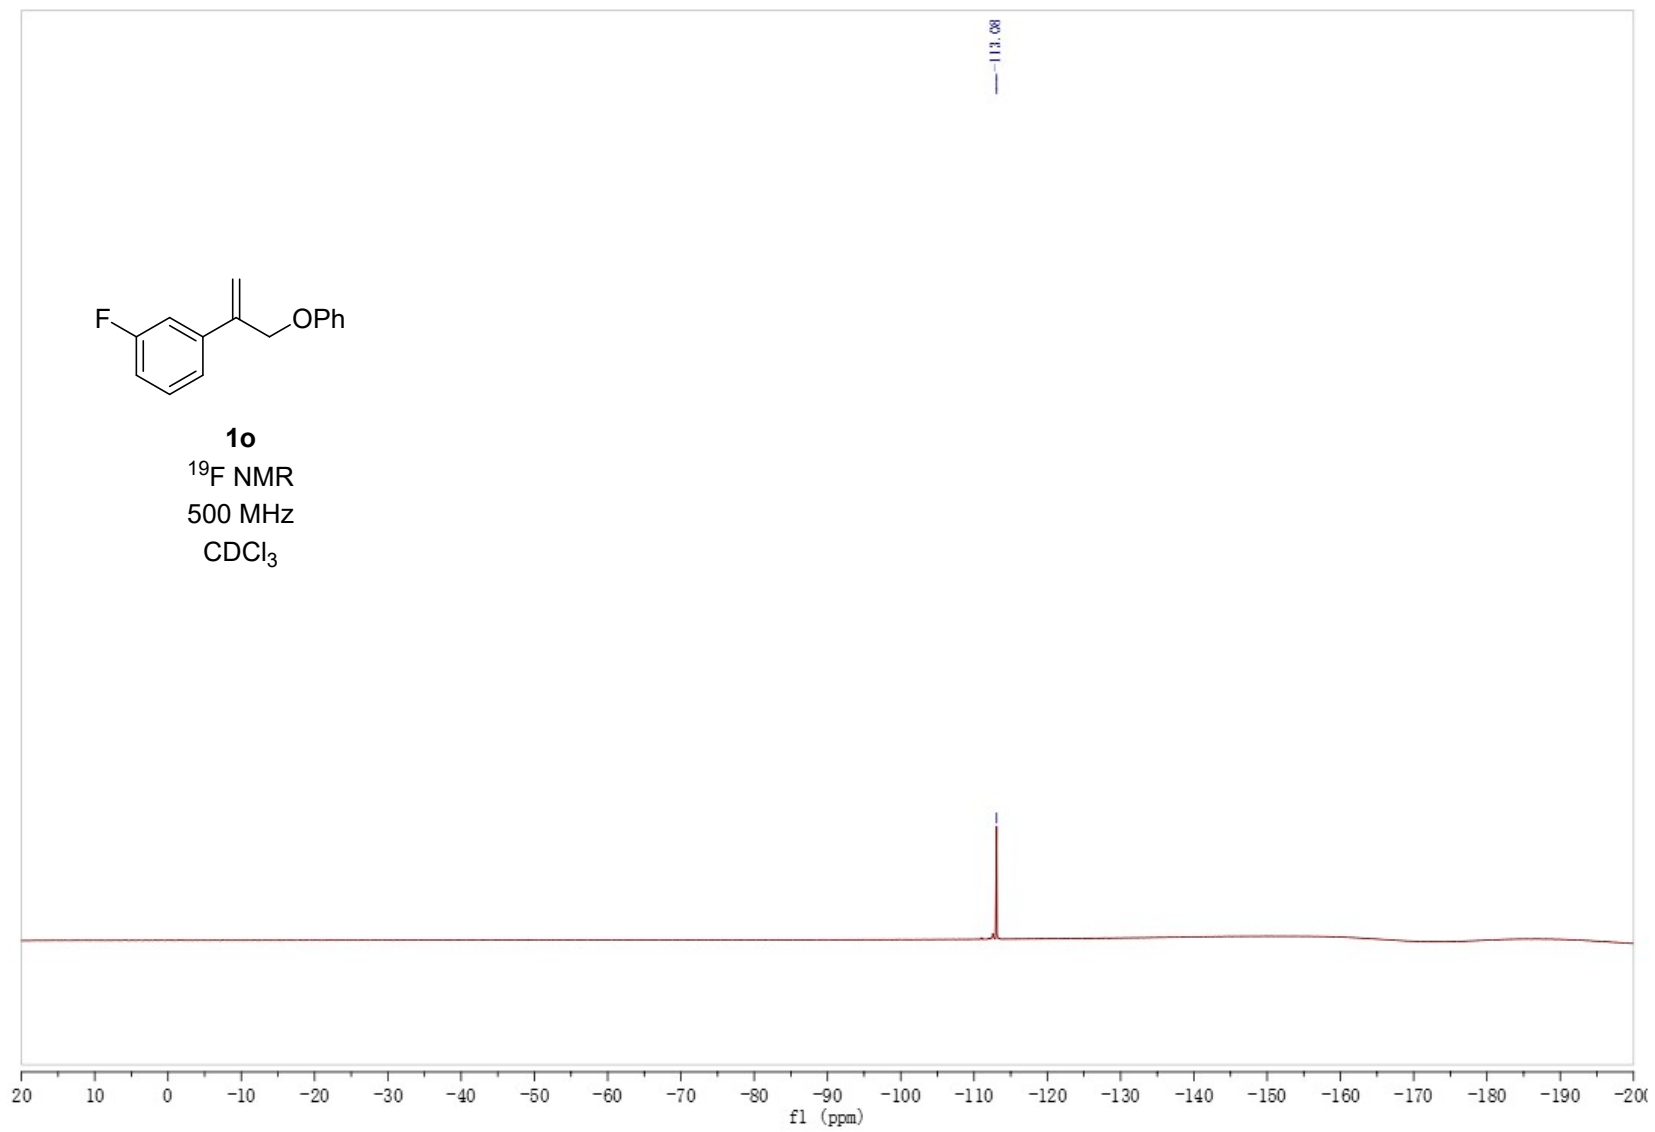

S64



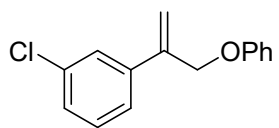

**1p**  
<sup>1</sup>H NMR  
500 MHz  
CDCl<sub>3</sub>

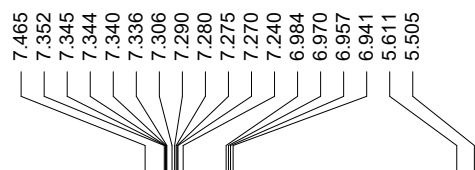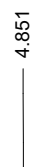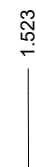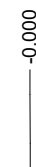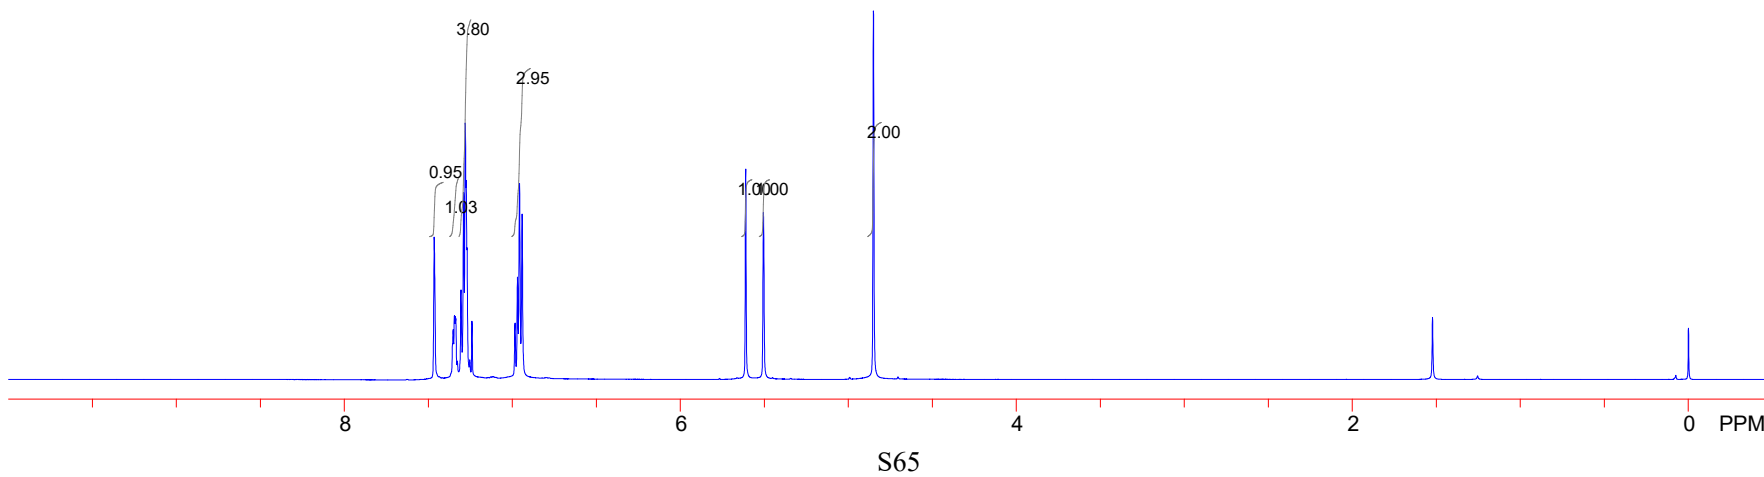



**1p**

<sup>13</sup>C NMR

500 MHz

CDCl<sub>3</sub>

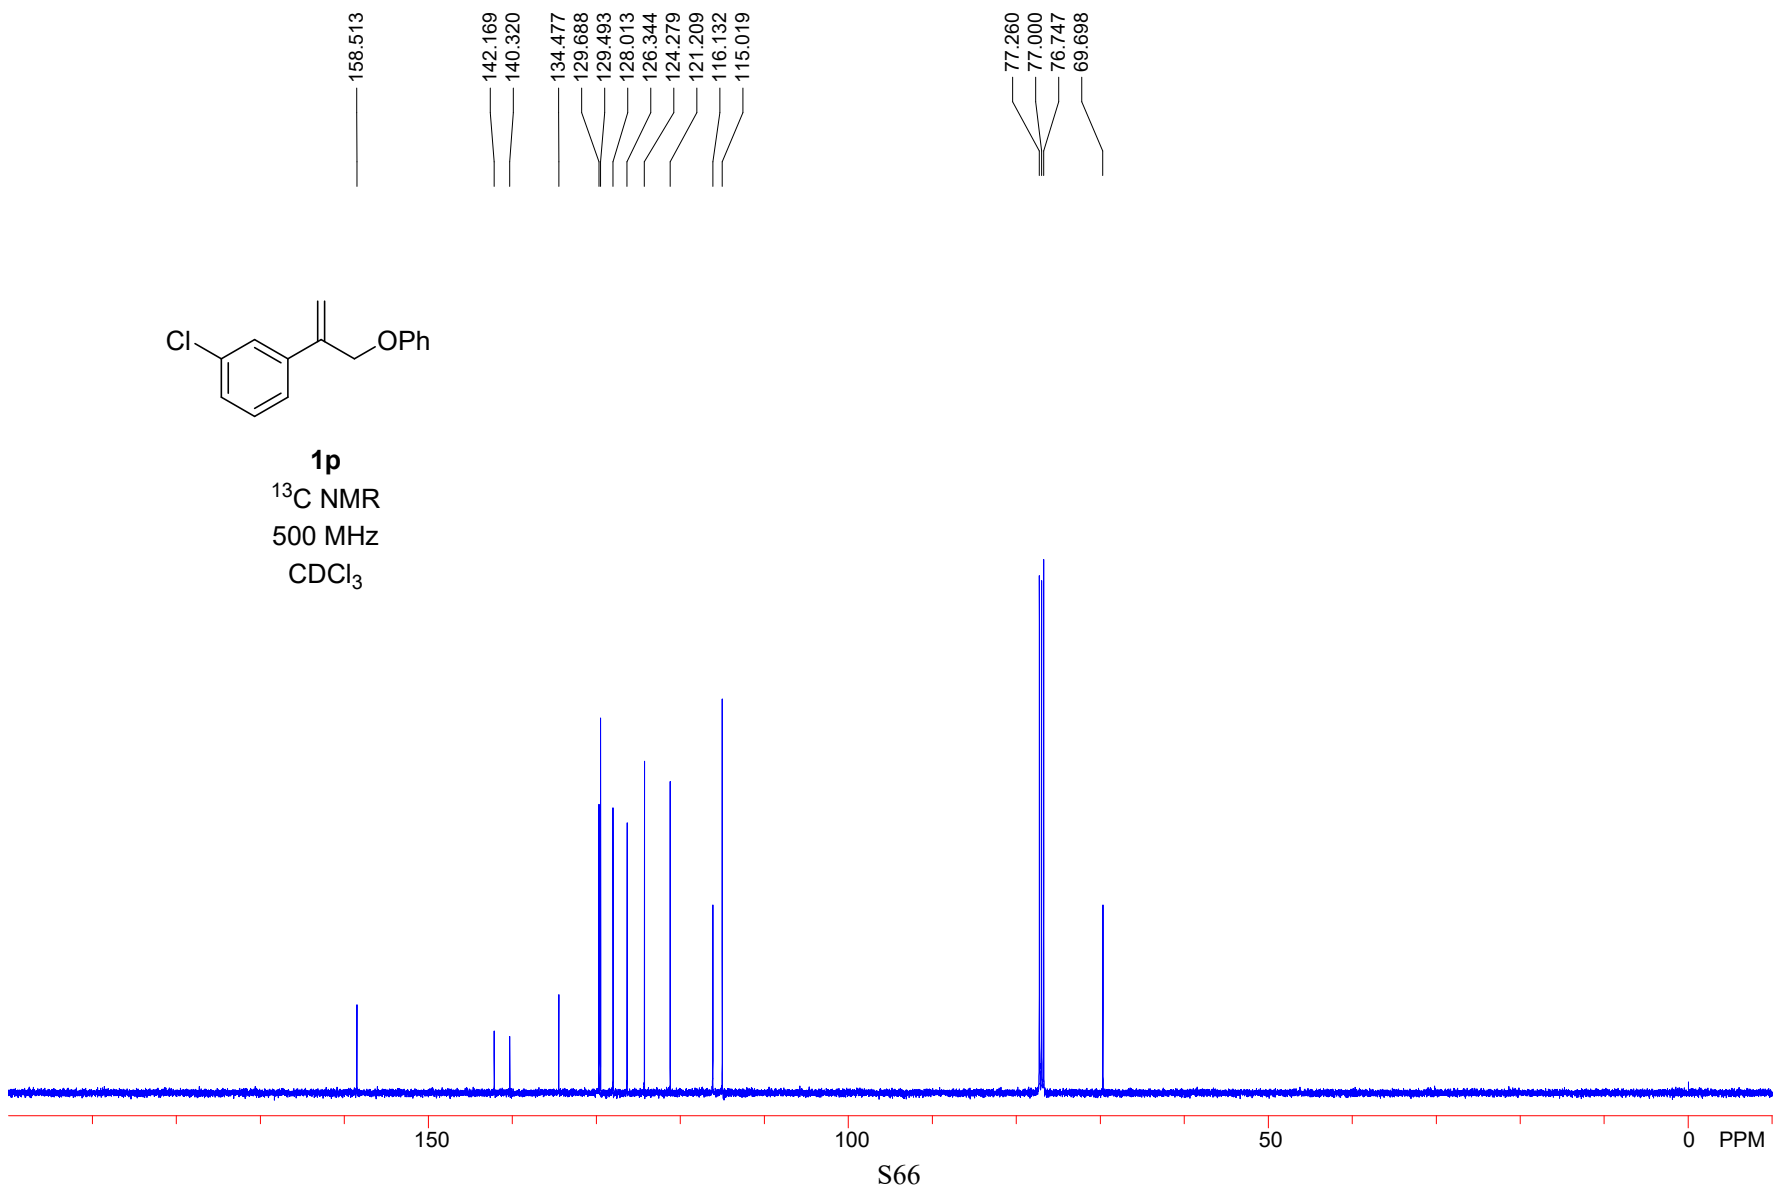

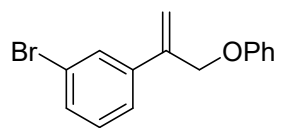

**1q**  
<sup>1</sup>H NMR  
500 MHz  
CDCl<sub>3</sub>

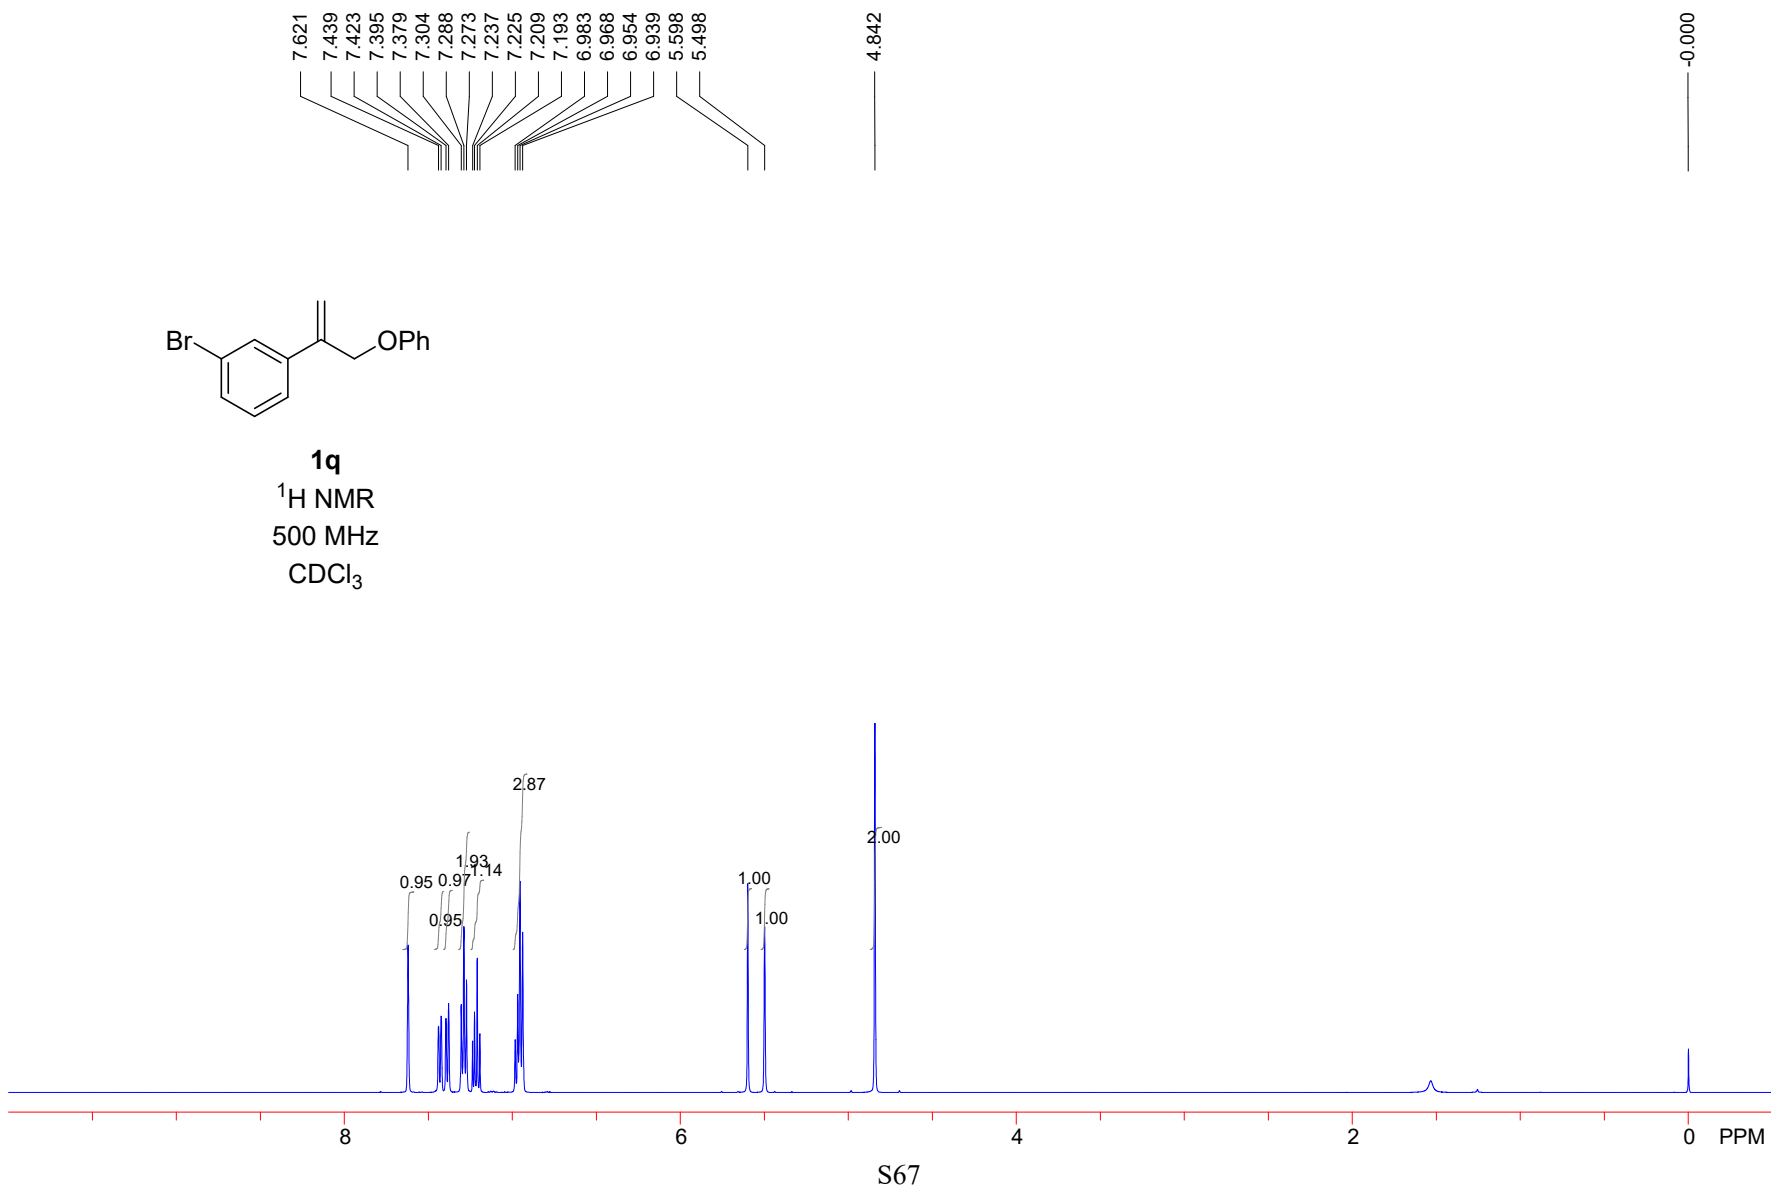

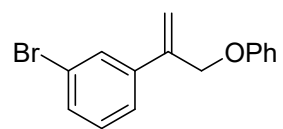

**1q**

<sup>13</sup>C NMR  
500 MHz  
CDCl<sub>3</sub>

158.499

142.097

140.609

130.938

129.963

129.479

129.241

124.741

122.682

121.209

116.161

115.019

77.253

77.000

76.747

69.676

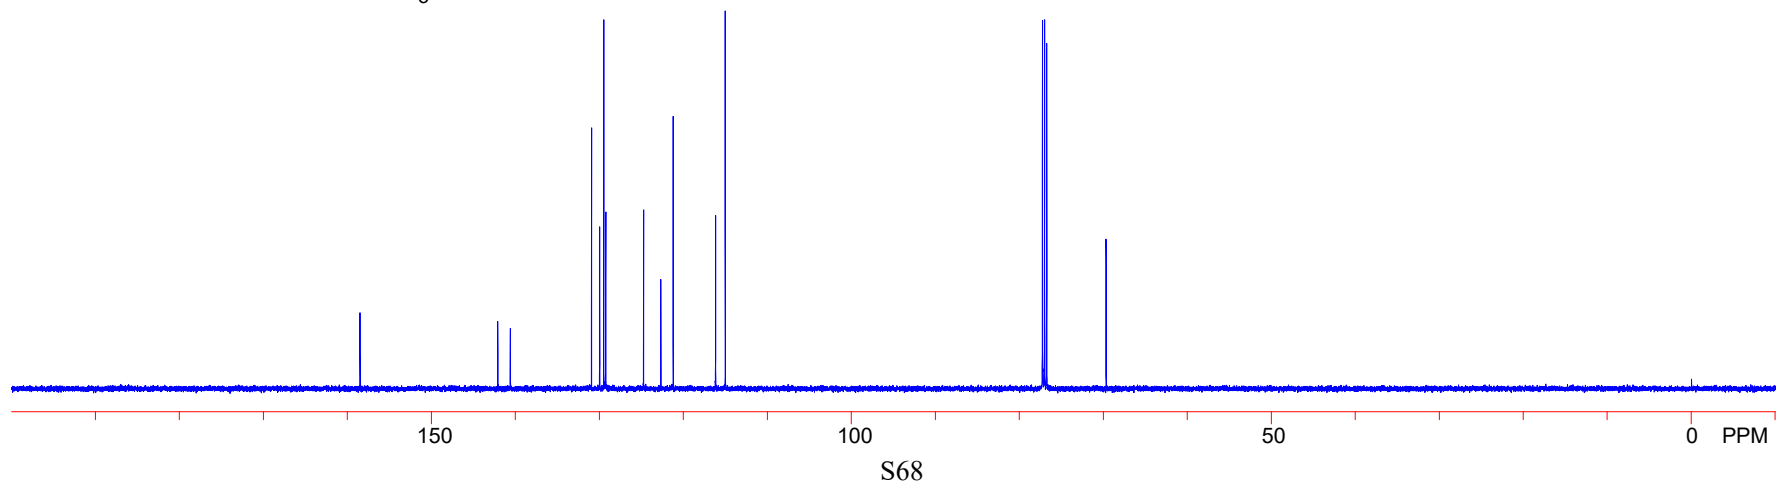

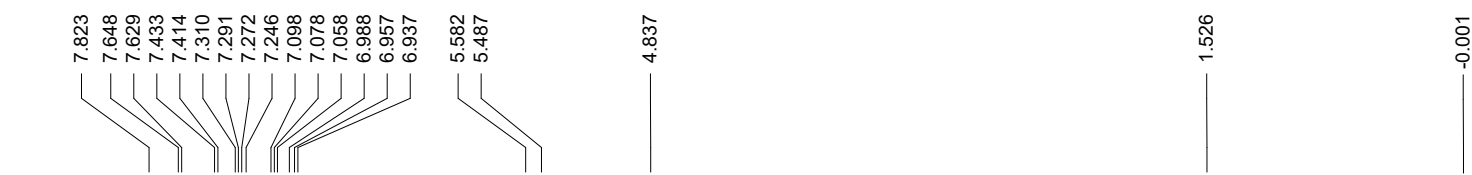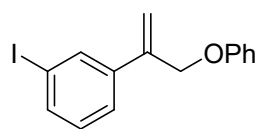

**1r**  
<sup>1</sup>H NMR  
 400 MHz  
 CDCl<sub>3</sub>

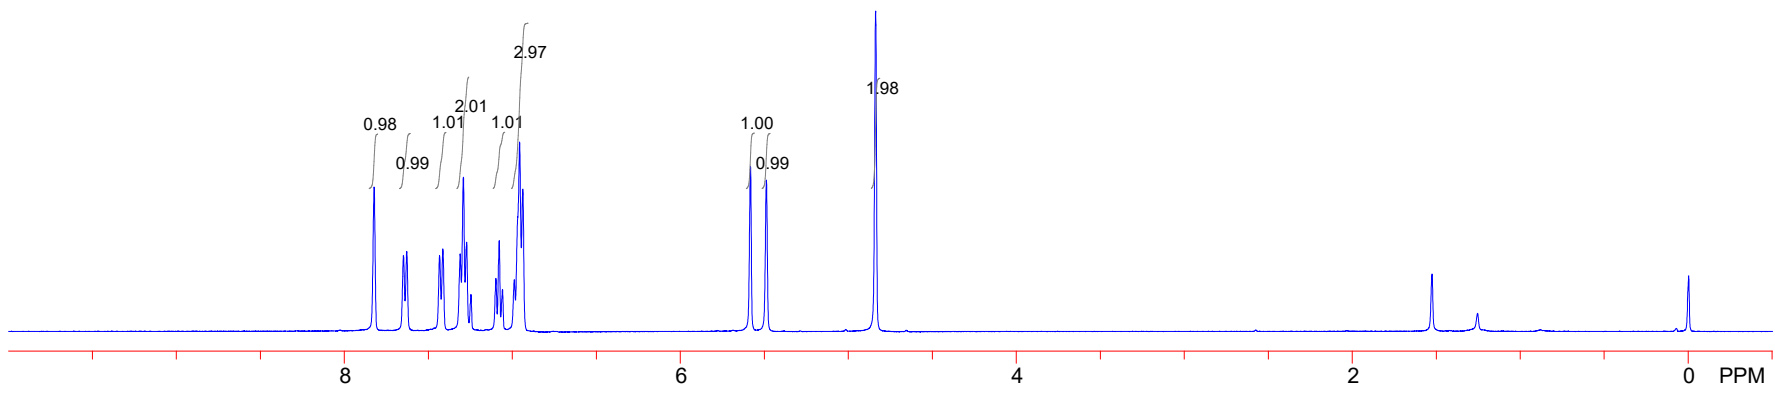

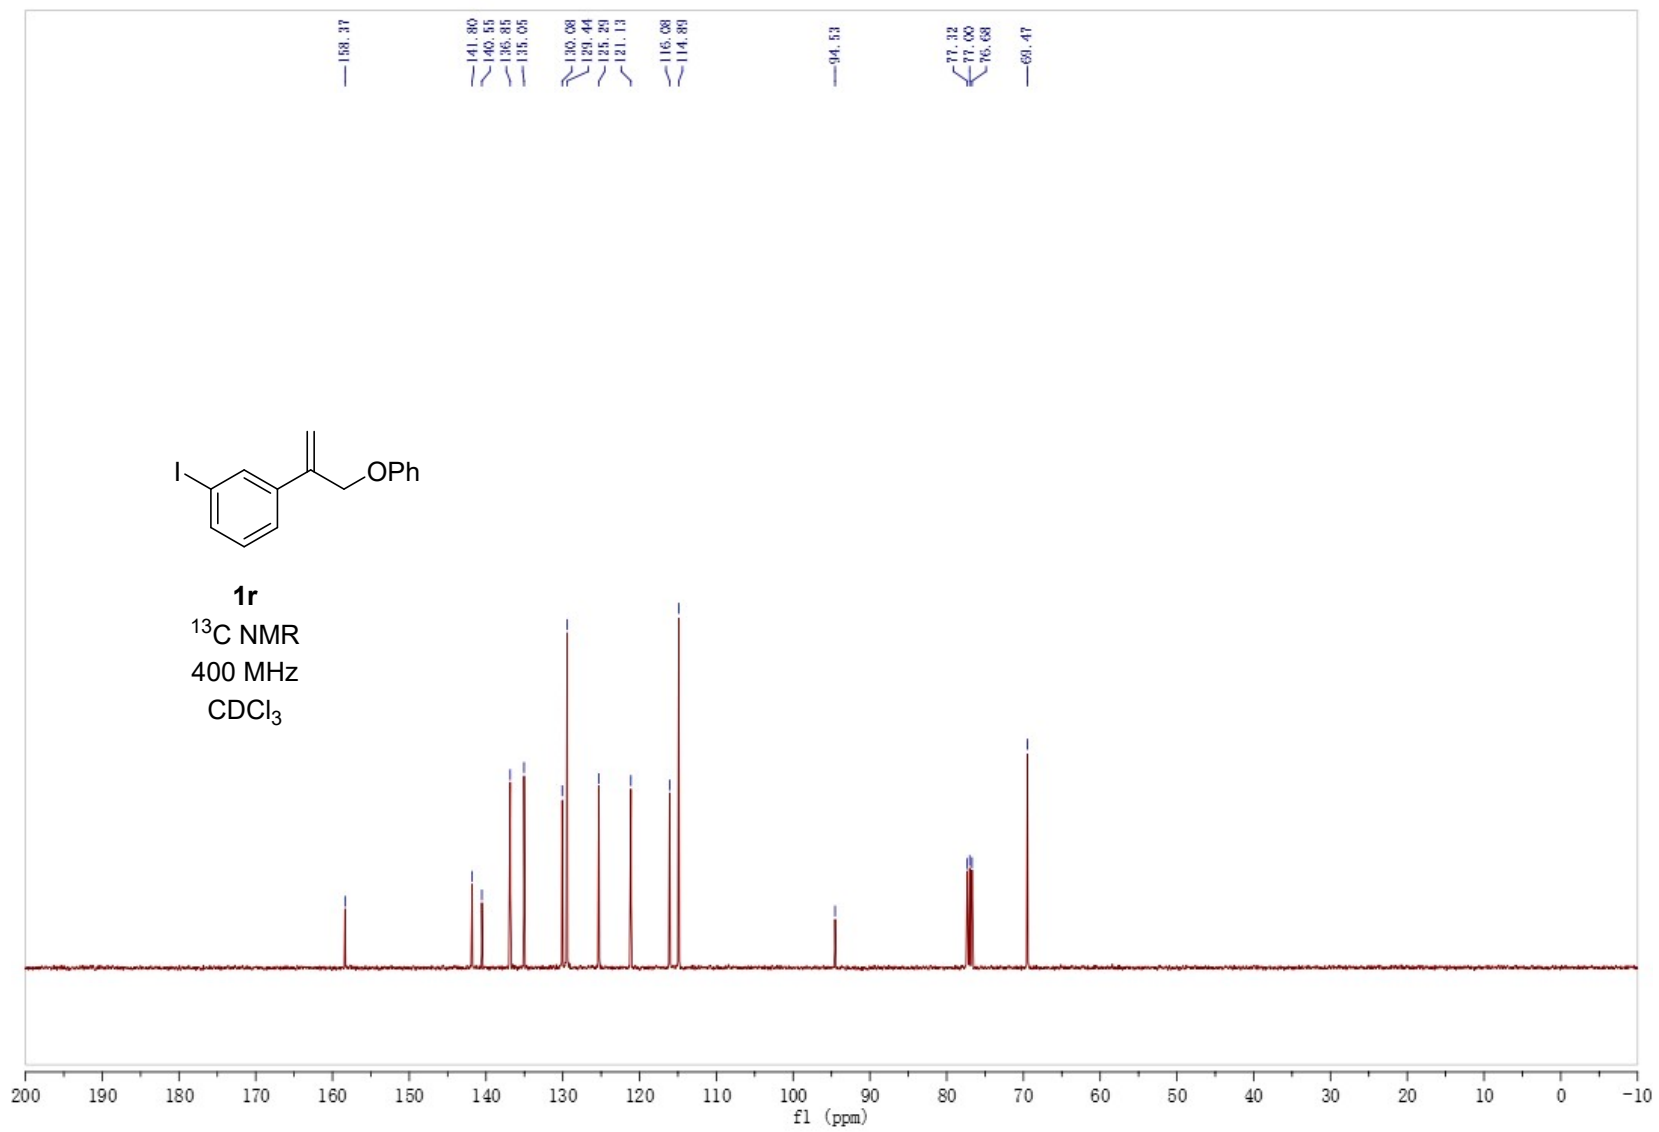

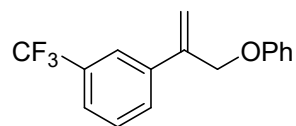

**1s**  
<sup>1</sup>H NMR  
500 MHz  
CDCl<sub>3</sub>

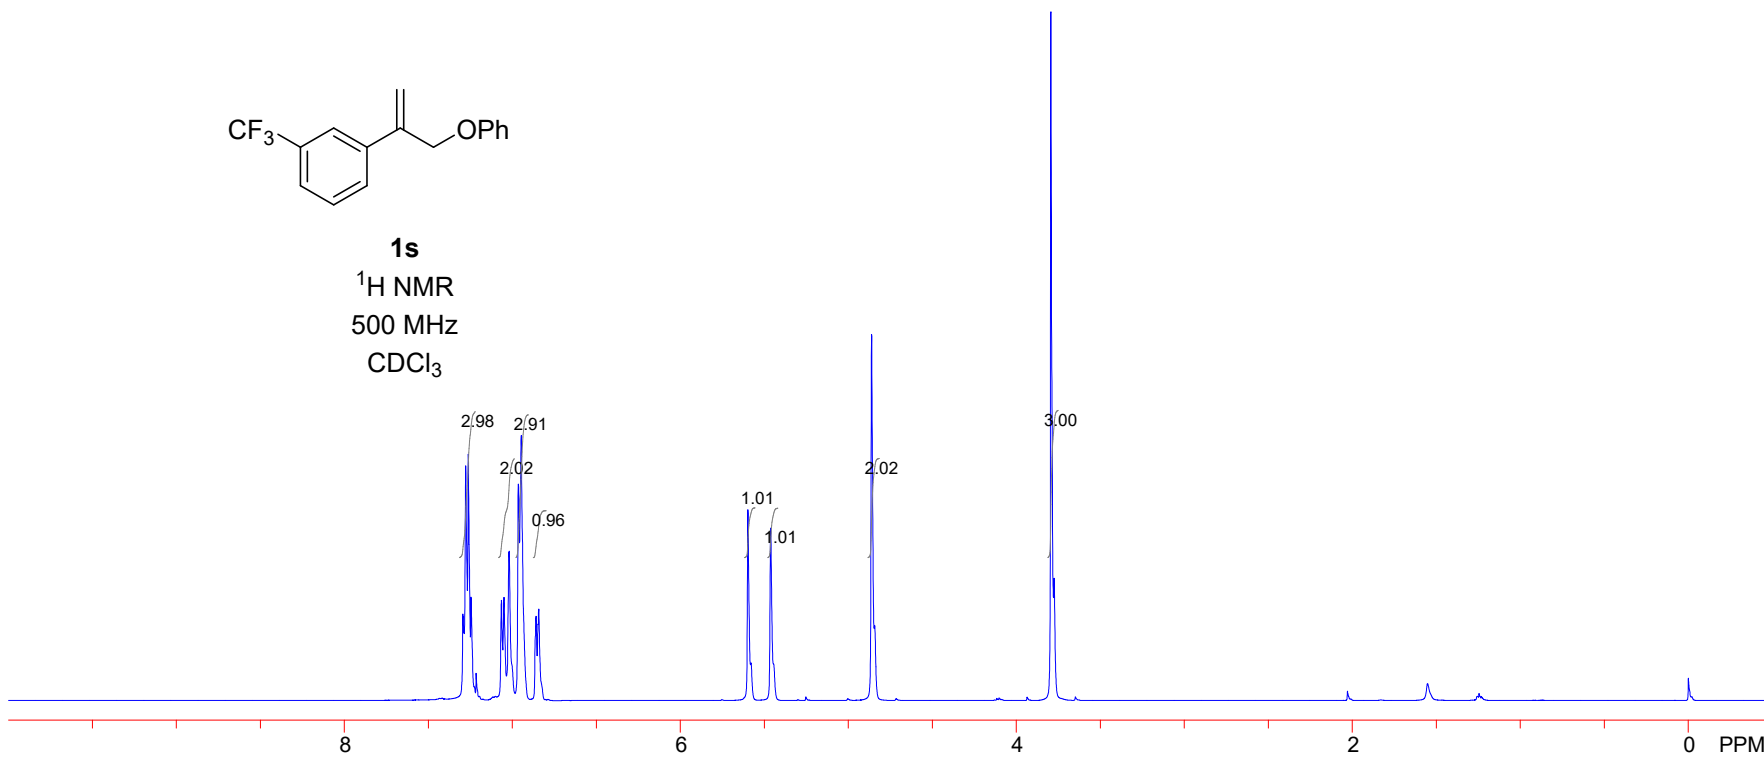

S71

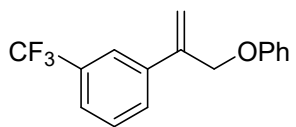

**1s**

<sup>13</sup>C NMR

500 MHz

CDCl<sub>3</sub>

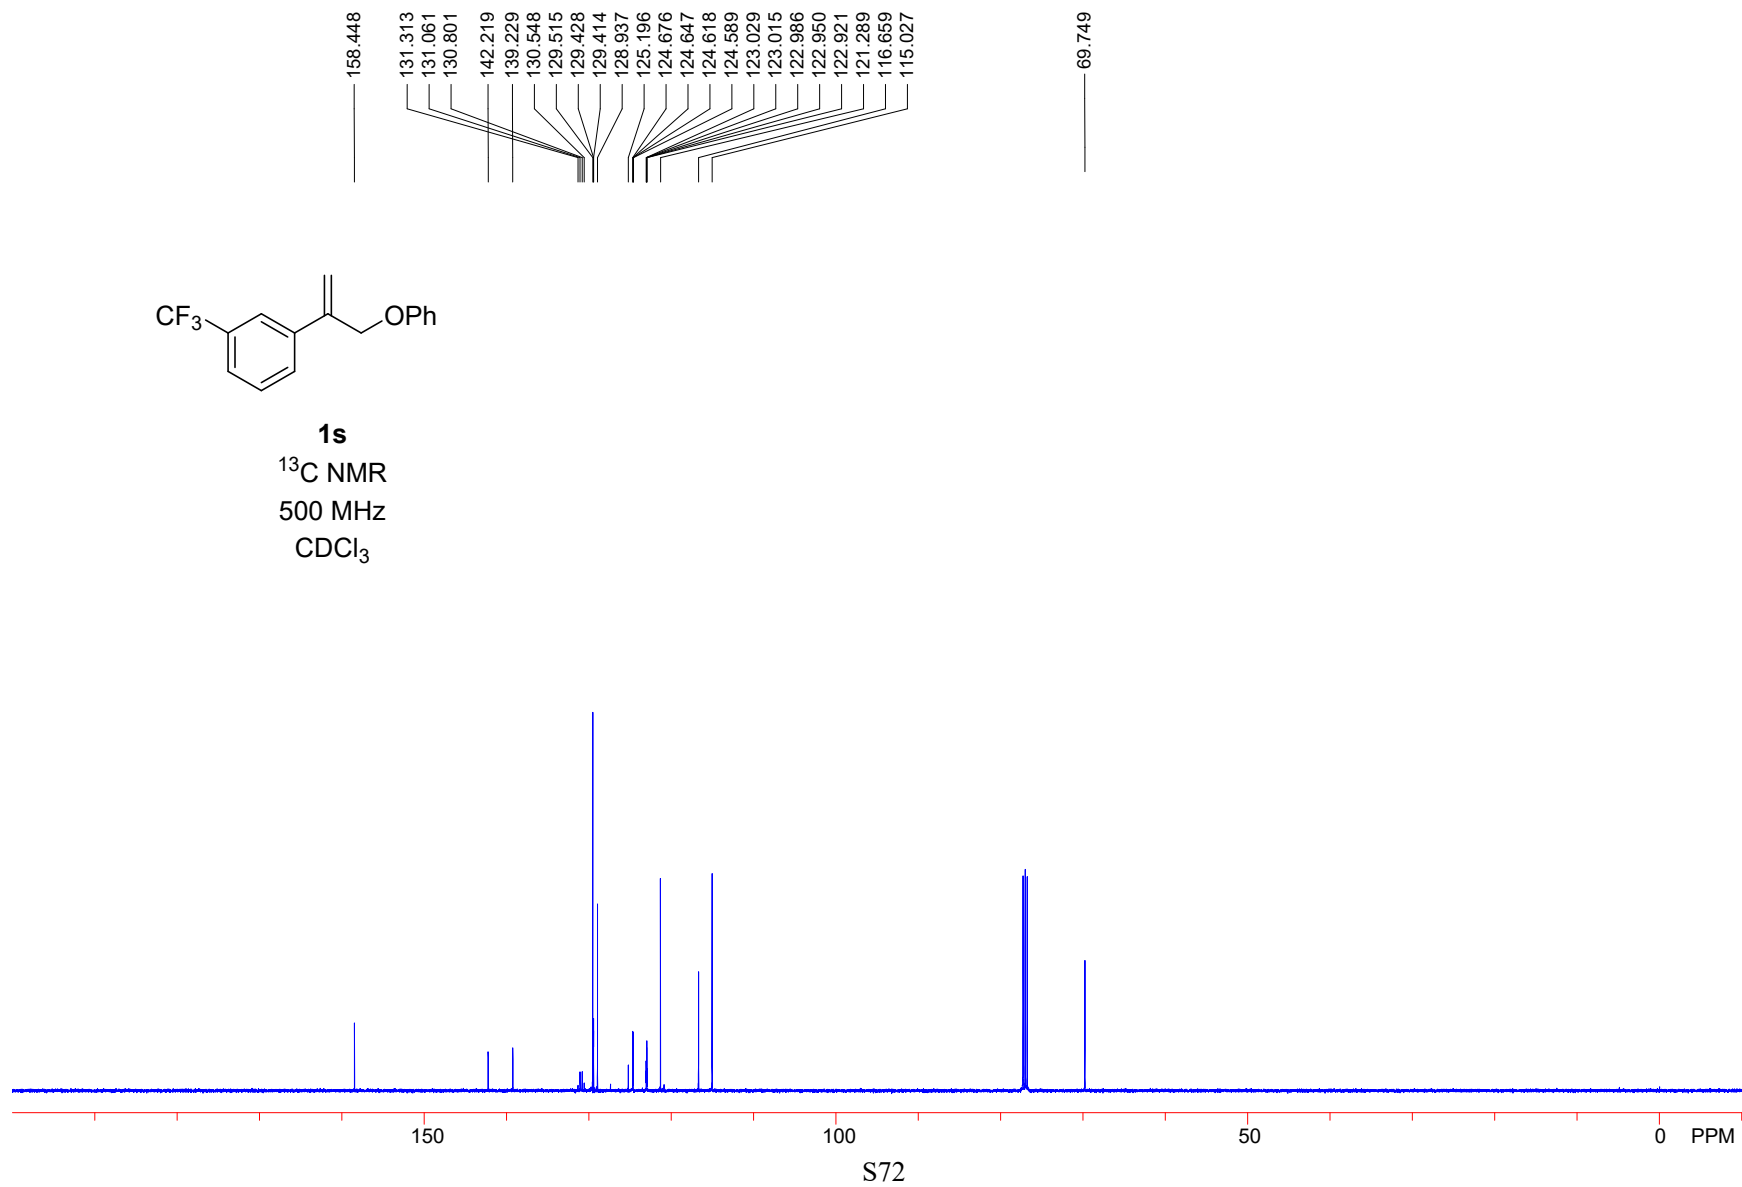



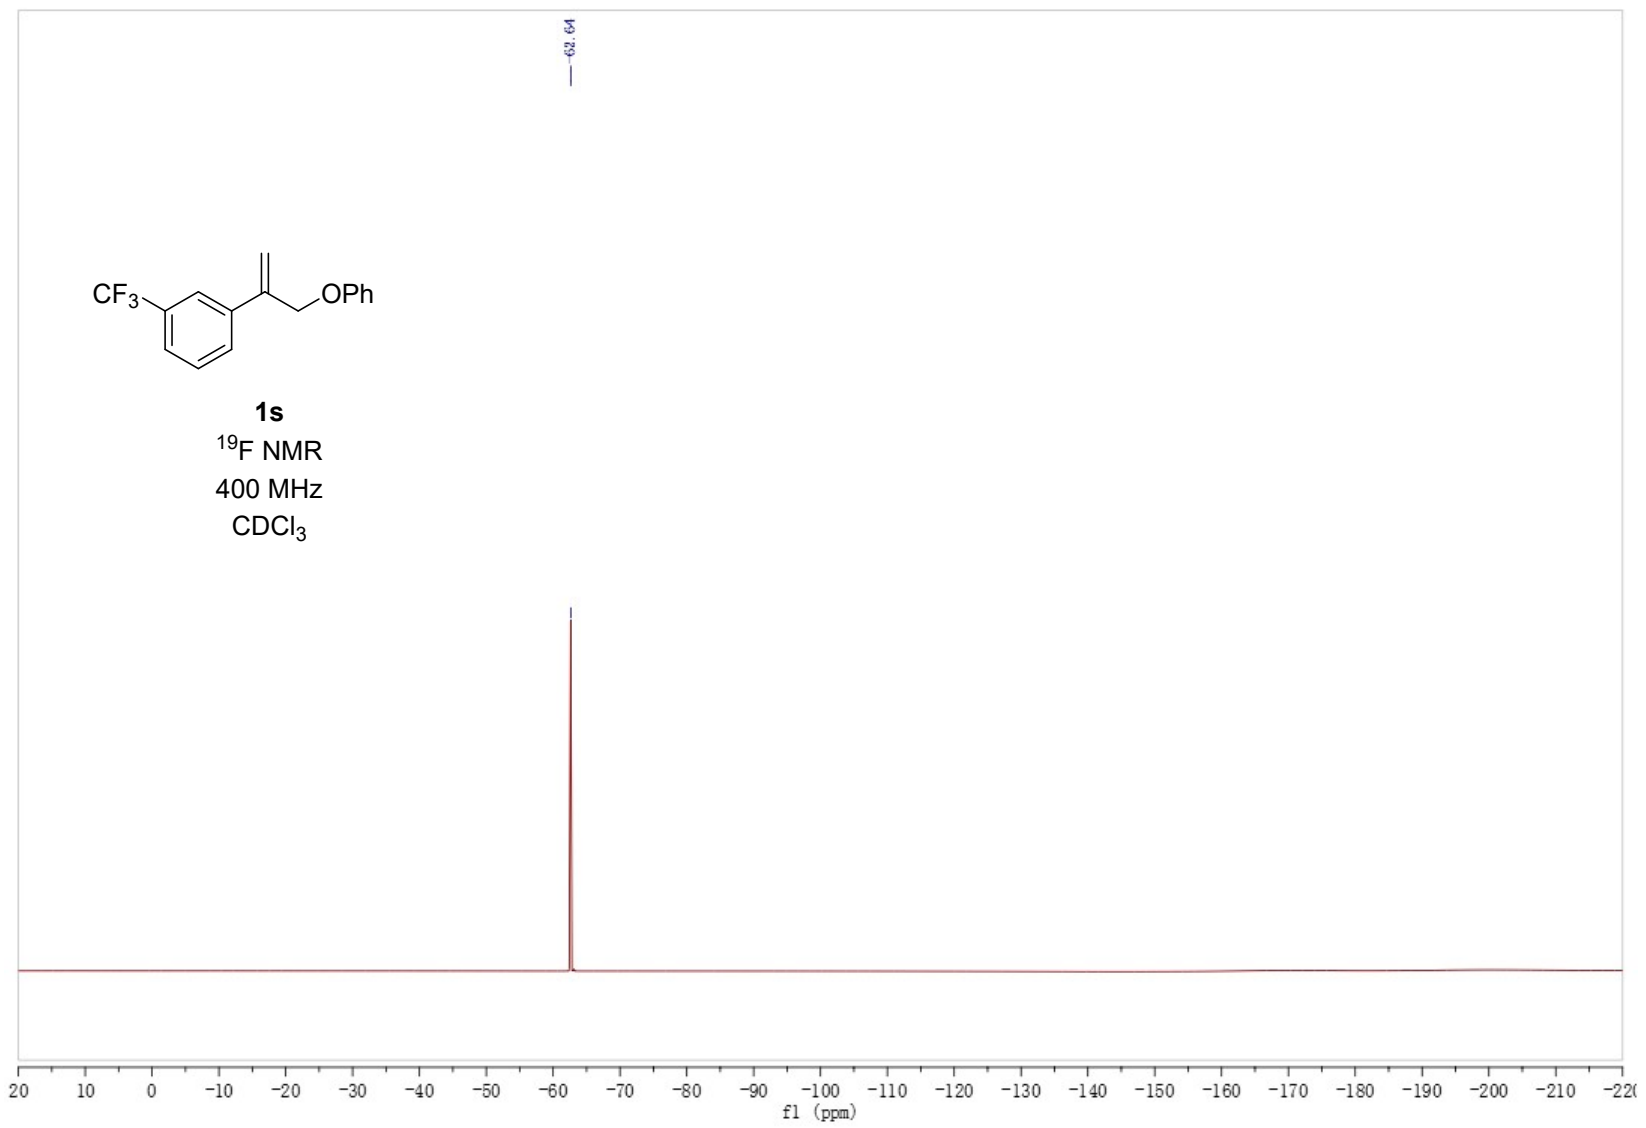

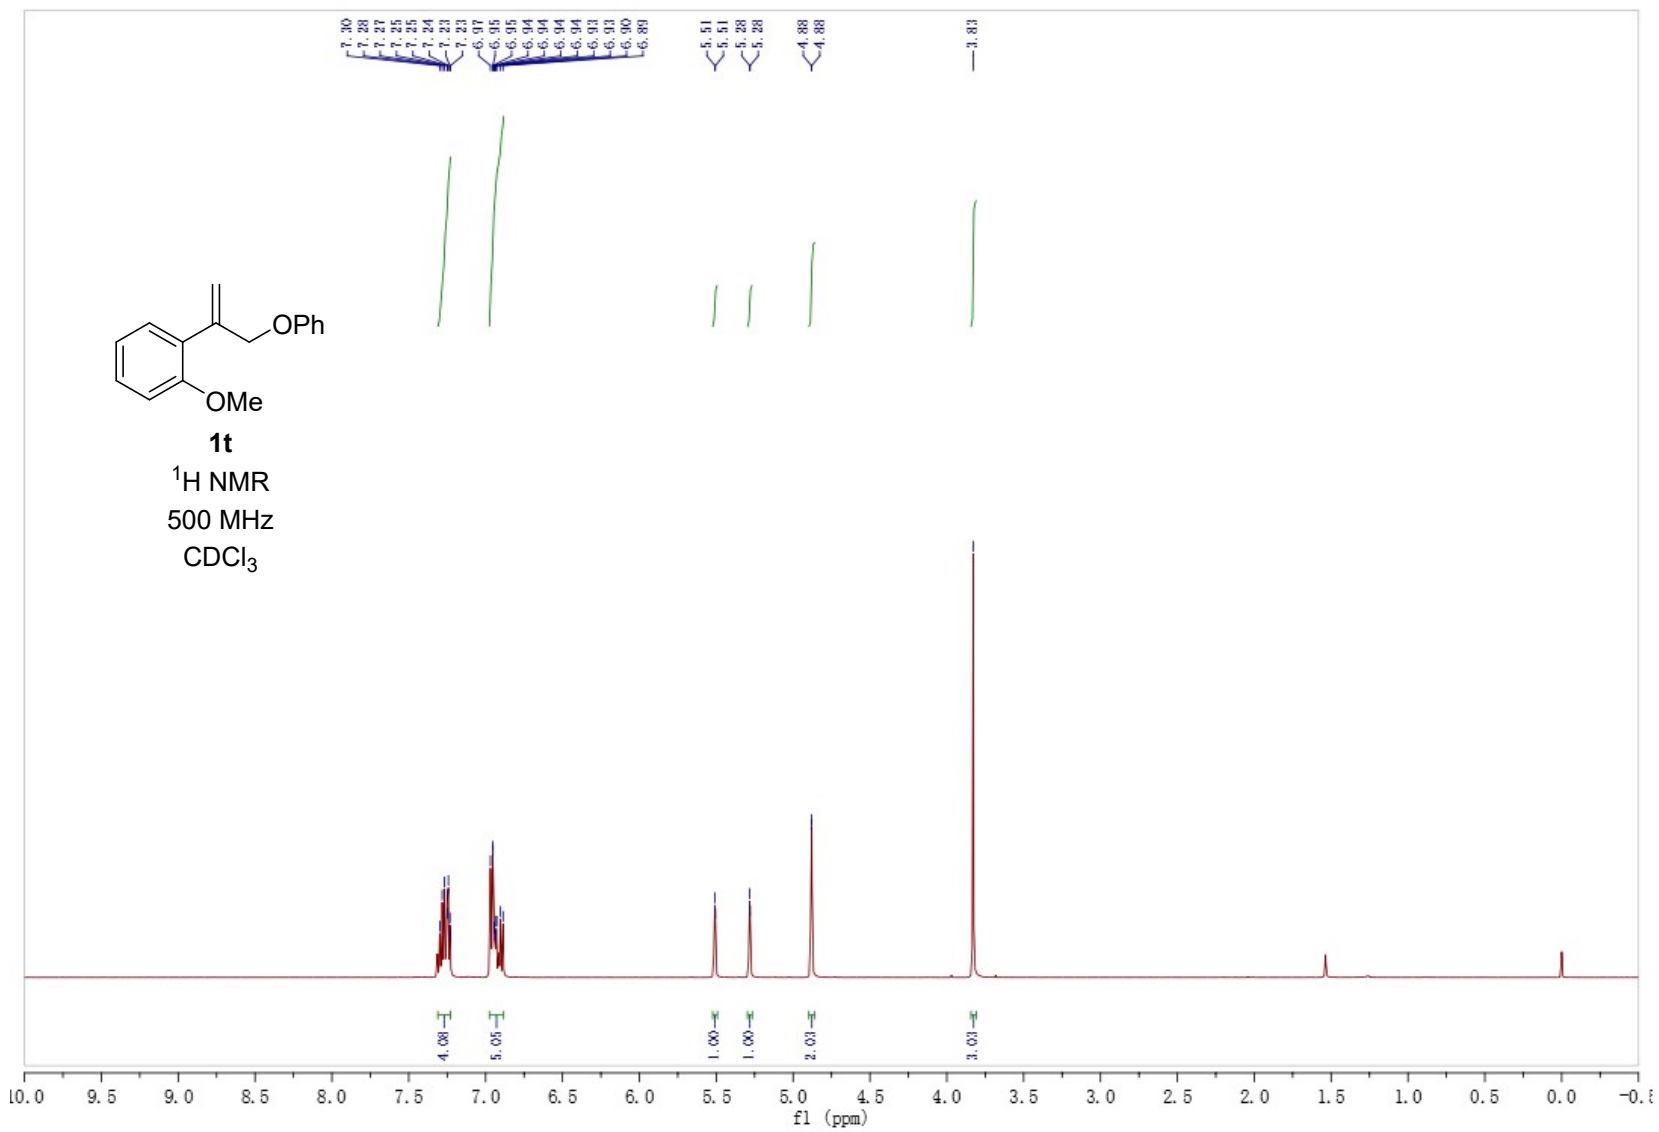

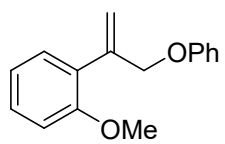

**1t**

<sup>13</sup>C NMR  
500 MHz  
CDCl<sub>3</sub>

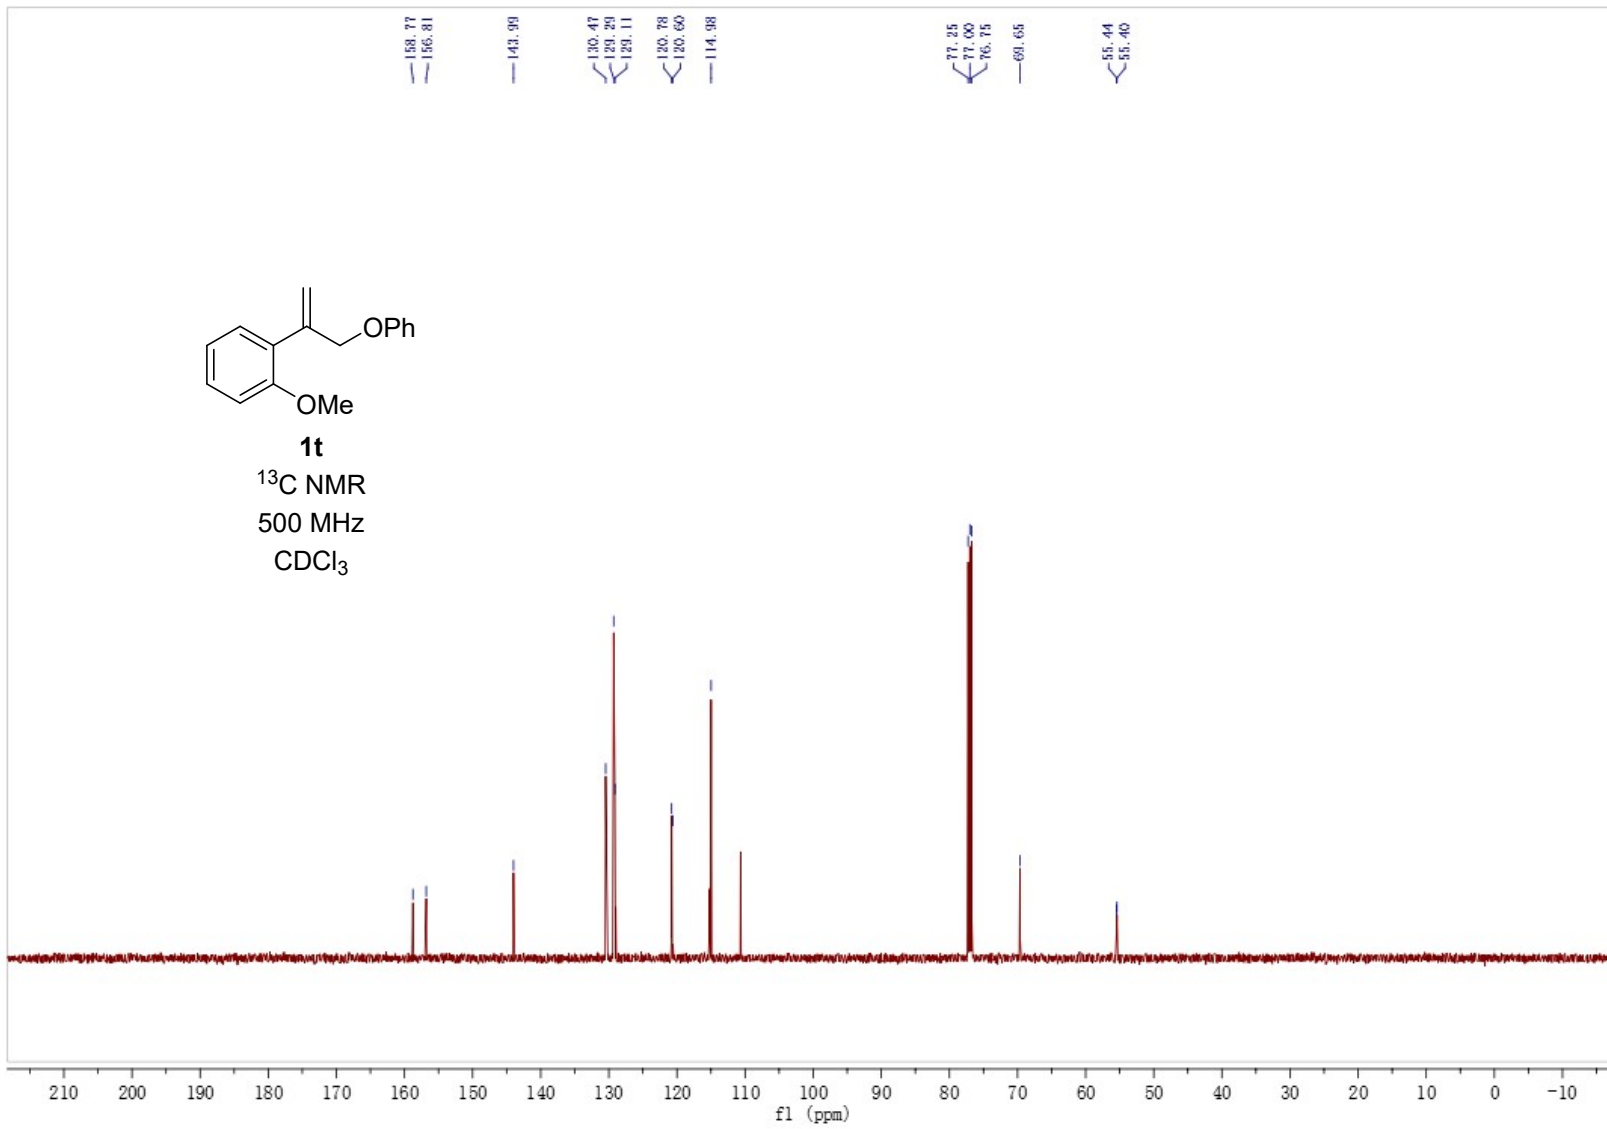

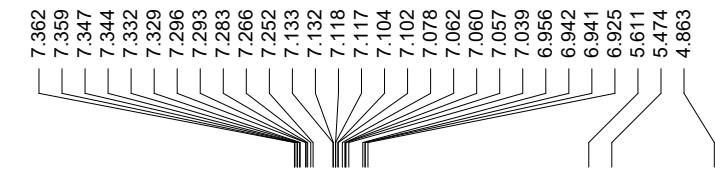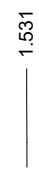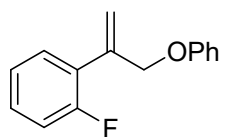

**1u**

<sup>1</sup>H NMR  
500 MHz  
CDCl<sub>3</sub>

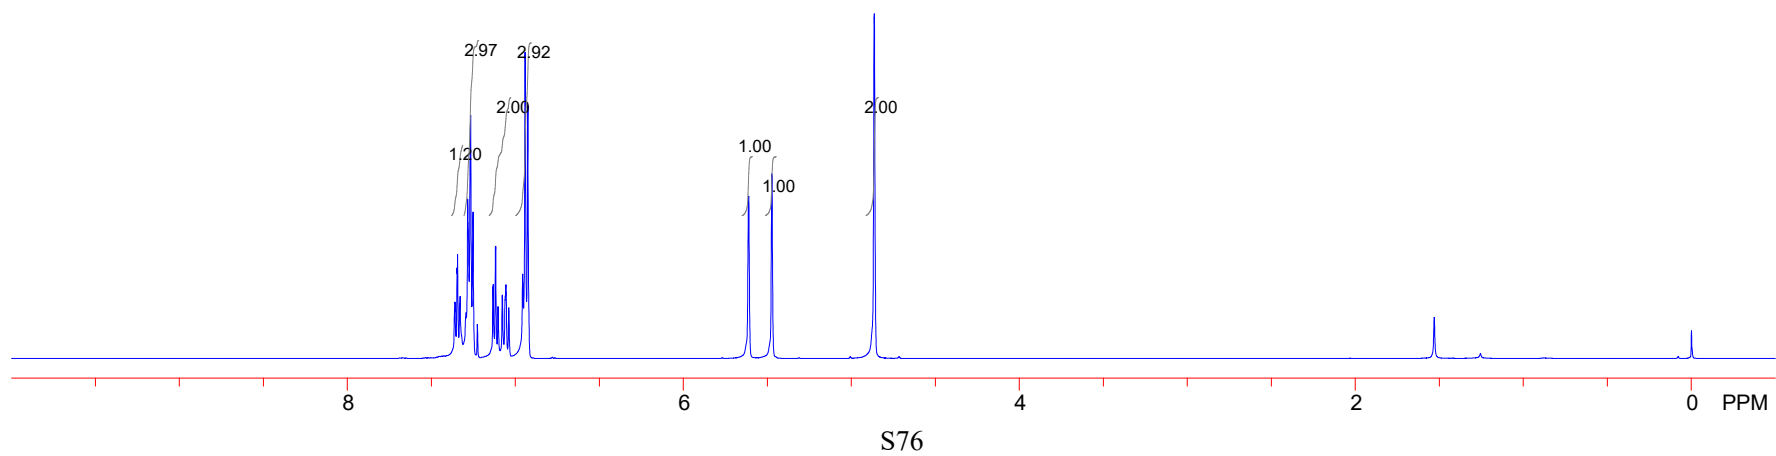

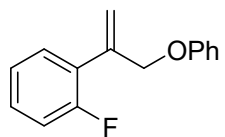

**1u**

<sup>13</sup>C NMR

500 MHz

CDCl<sub>3</sub>

161.070  
159.098  
158.564

140.277  
130.194  
130.158  
129.457  
129.392  
126.929  
126.821  
124.206  
124.178  
120.964  
117.540  
117.511  
115.864  
115.684  
114.990

77.253  
77.000  
76.747  
69.907

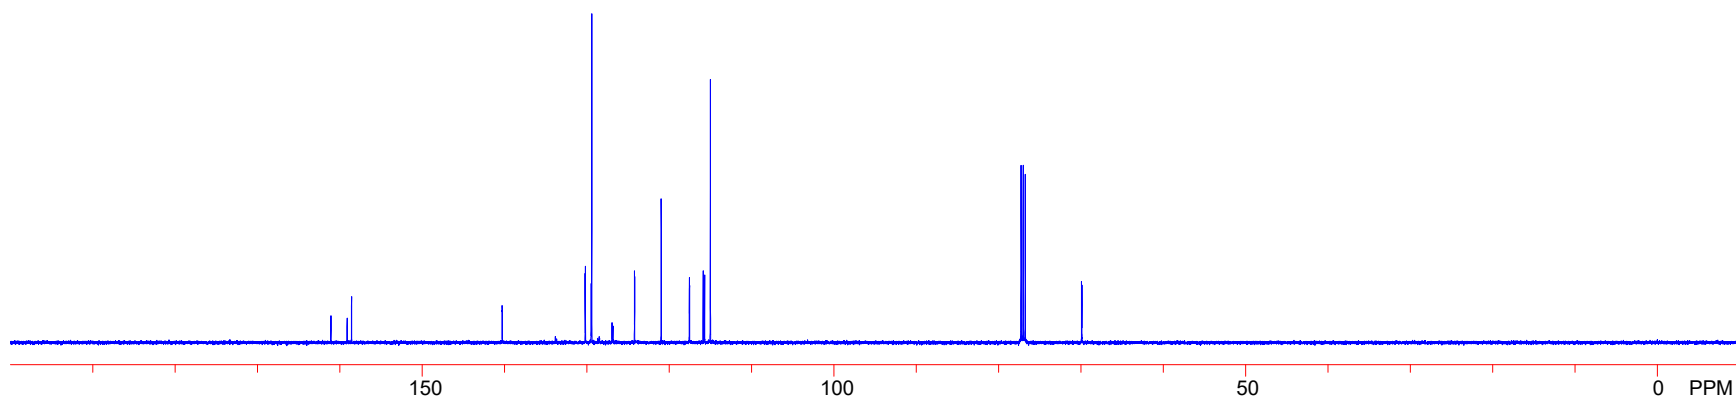

S77

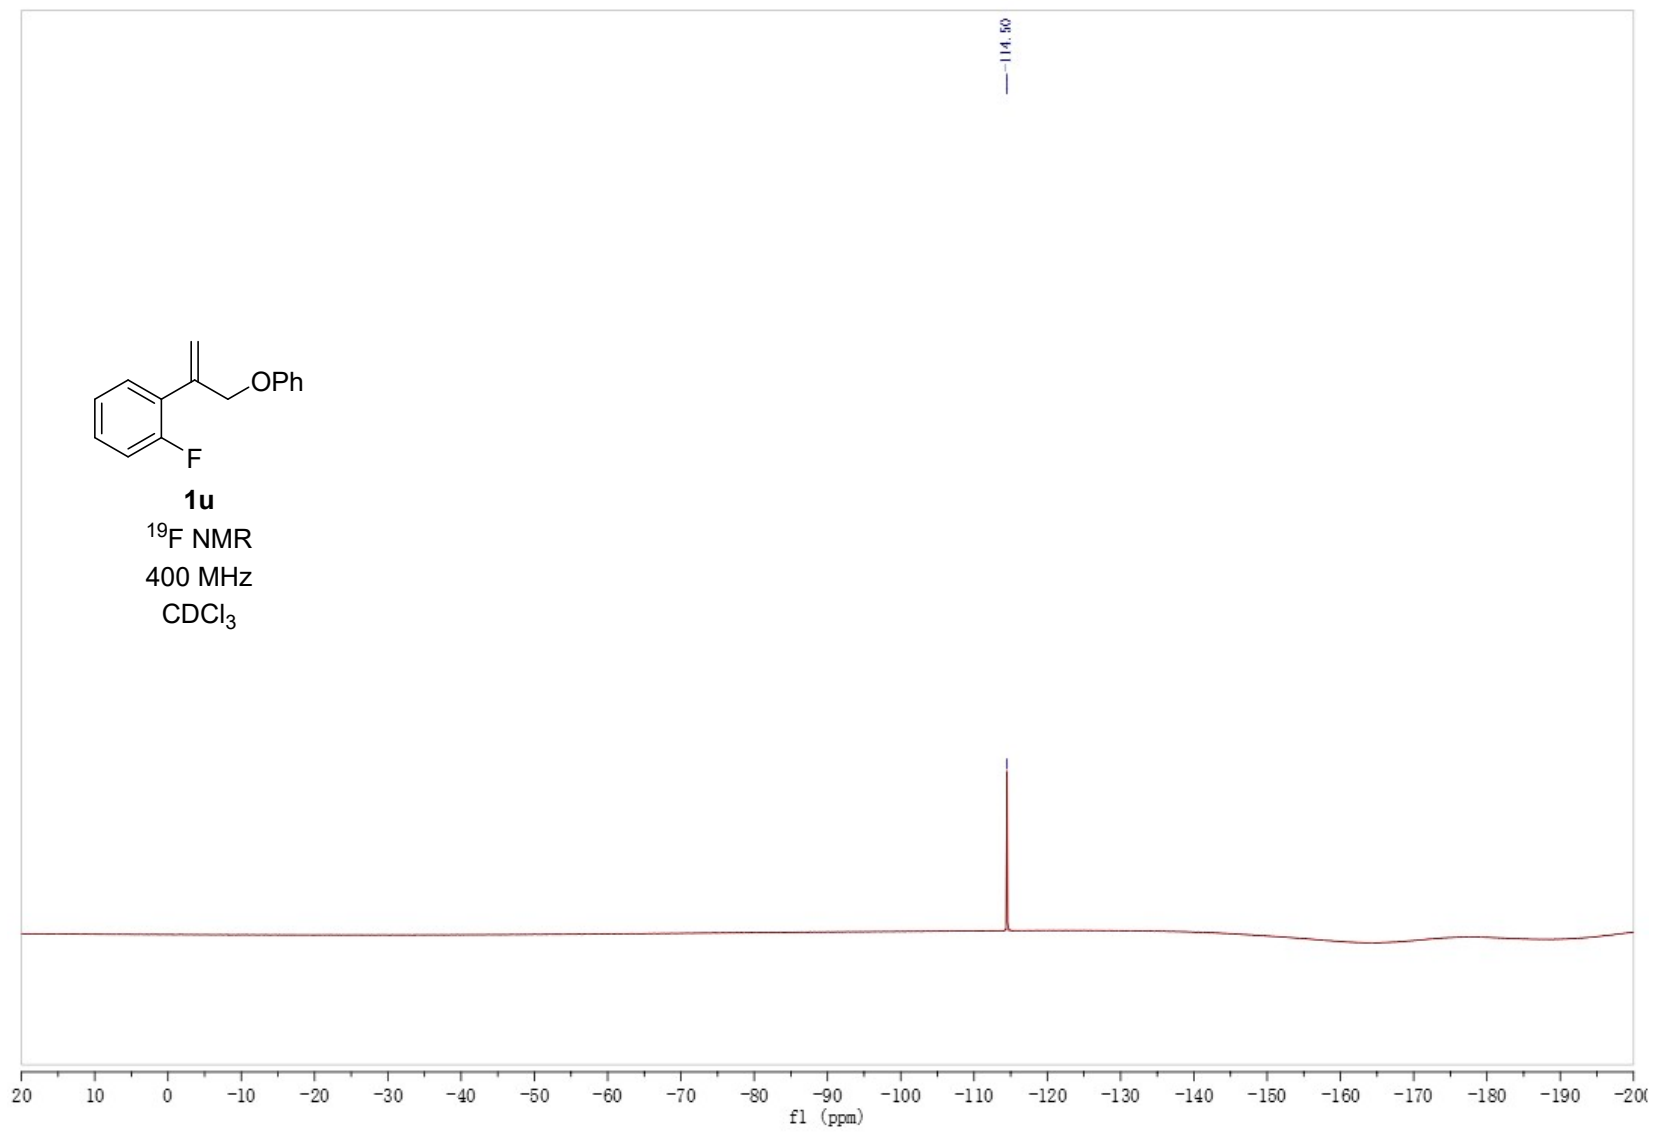

S78

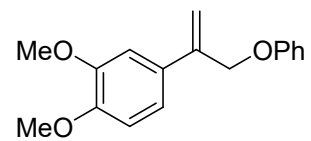

**1v**

<sup>1</sup>H NMR  
500 MHz  
CDCl<sub>3</sub>

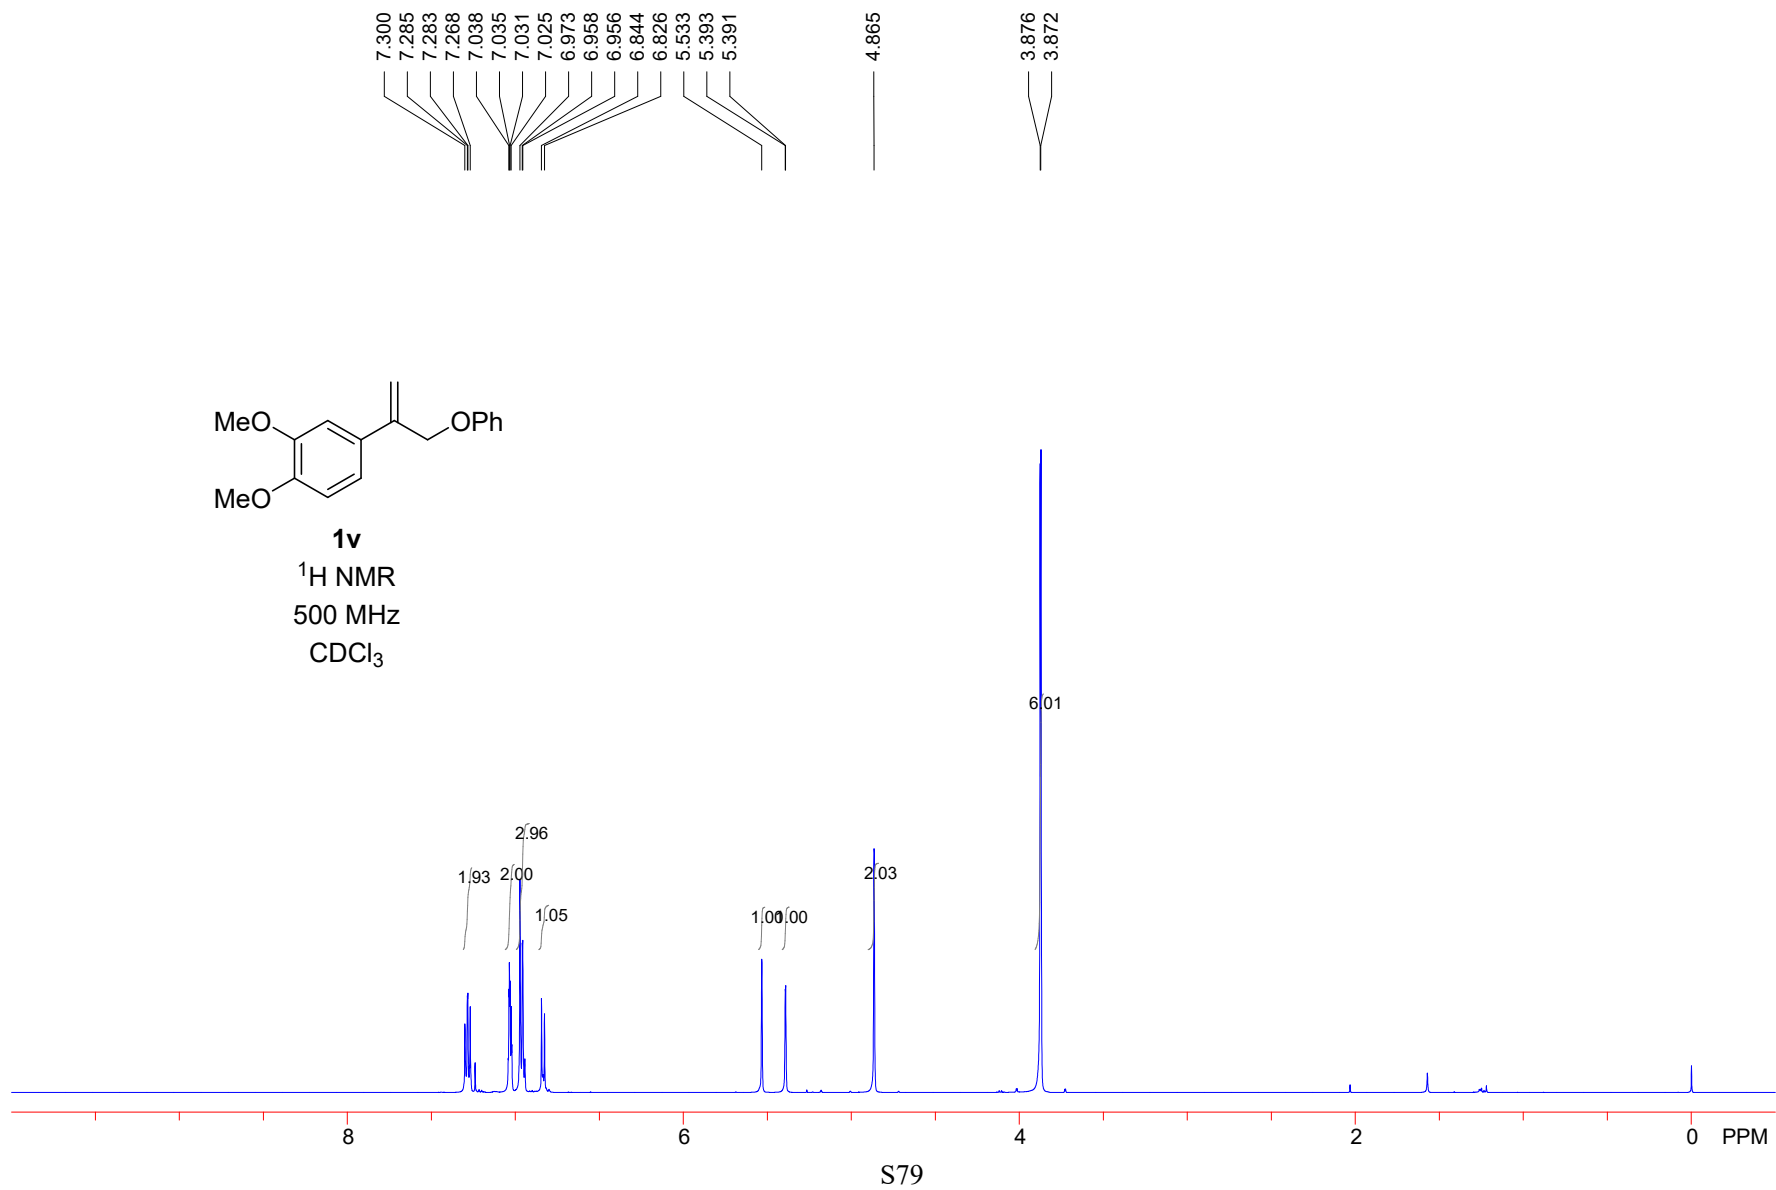

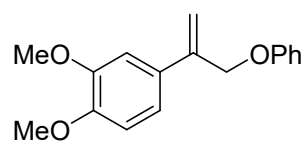

**1v**

<sup>13</sup>C NMR  
500 MHz  
CDCl<sub>3</sub>

158.665  
149.146  
148.915  
142.689  
131.306  
129.407  
121.007  
118.551  
114.990  
113.568  
111.098  
109.660  
77.260  
77.000  
76.747  
70.110  
55.889

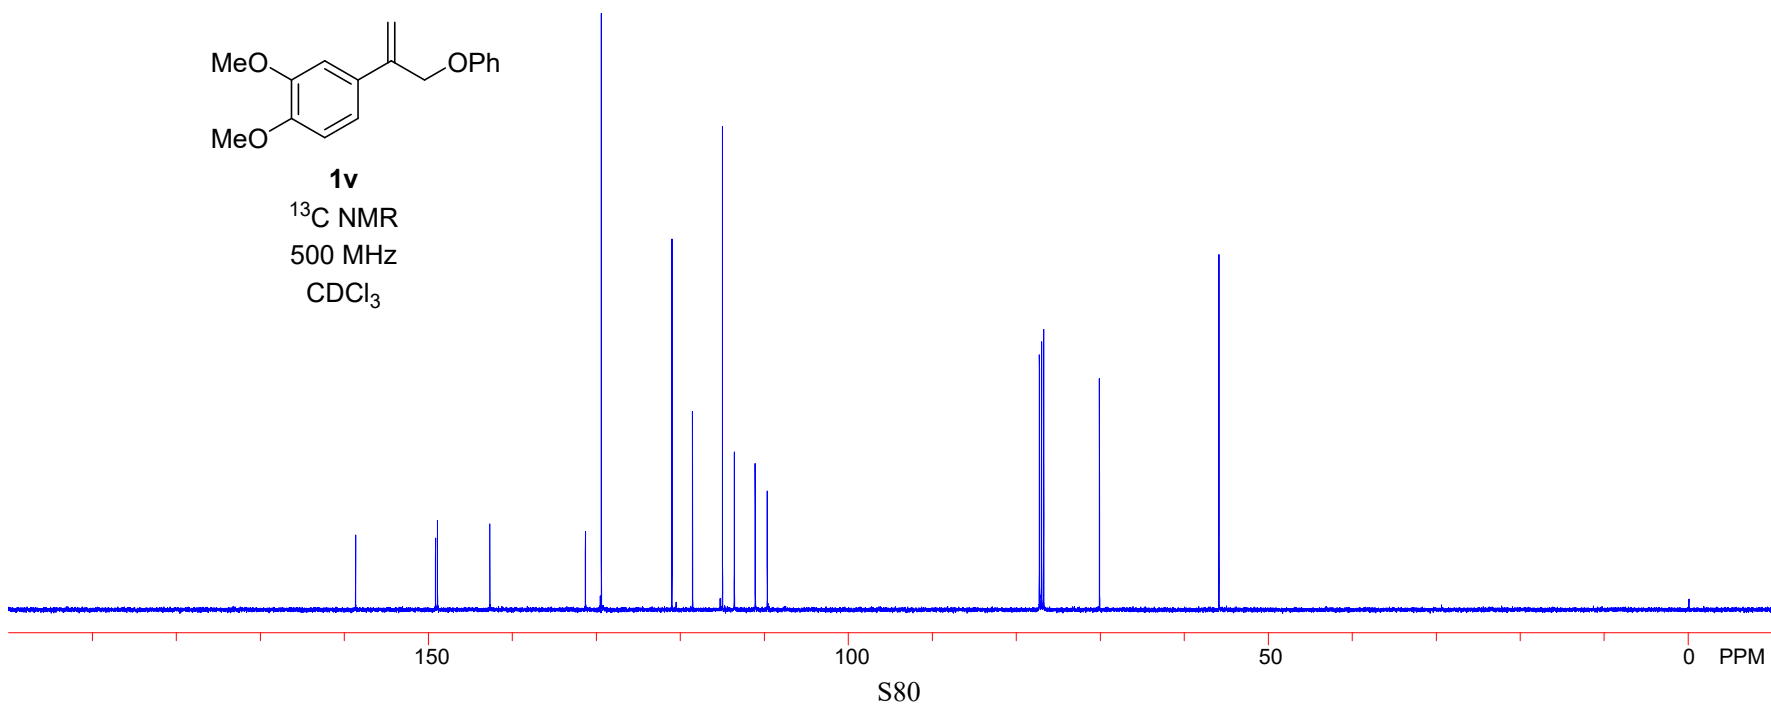



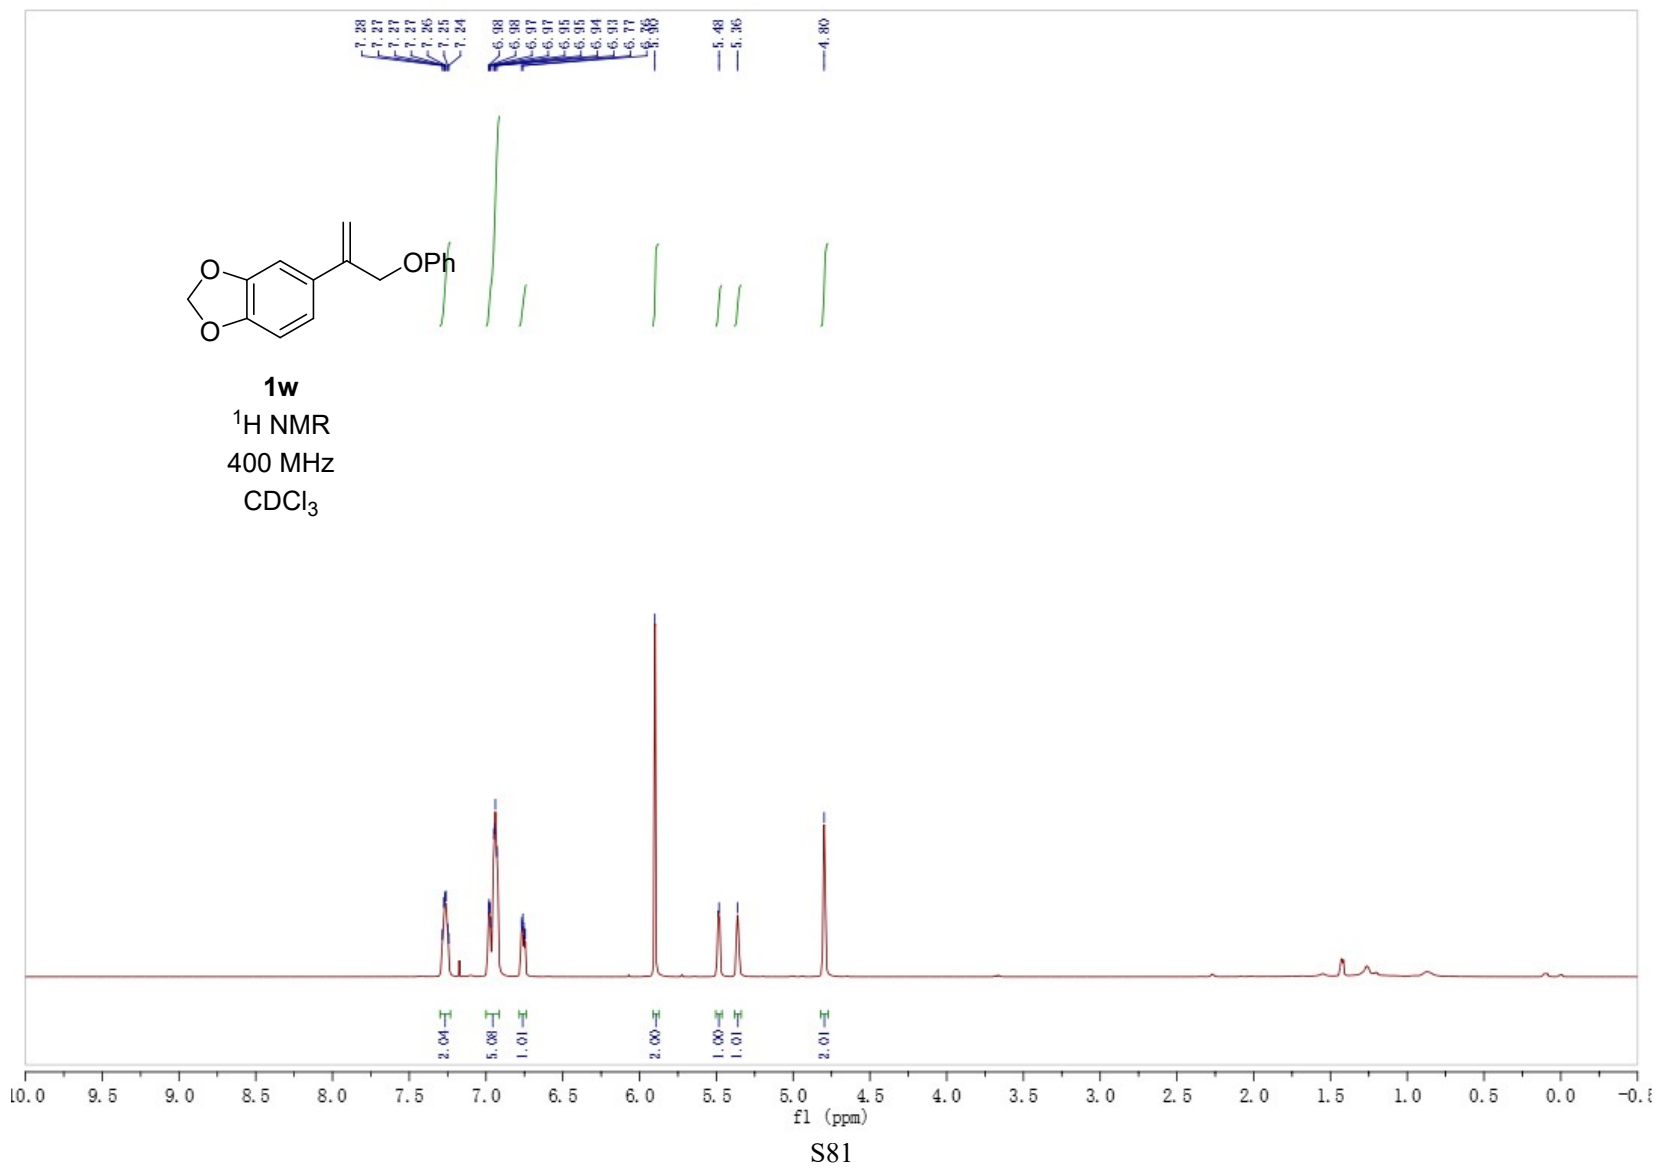

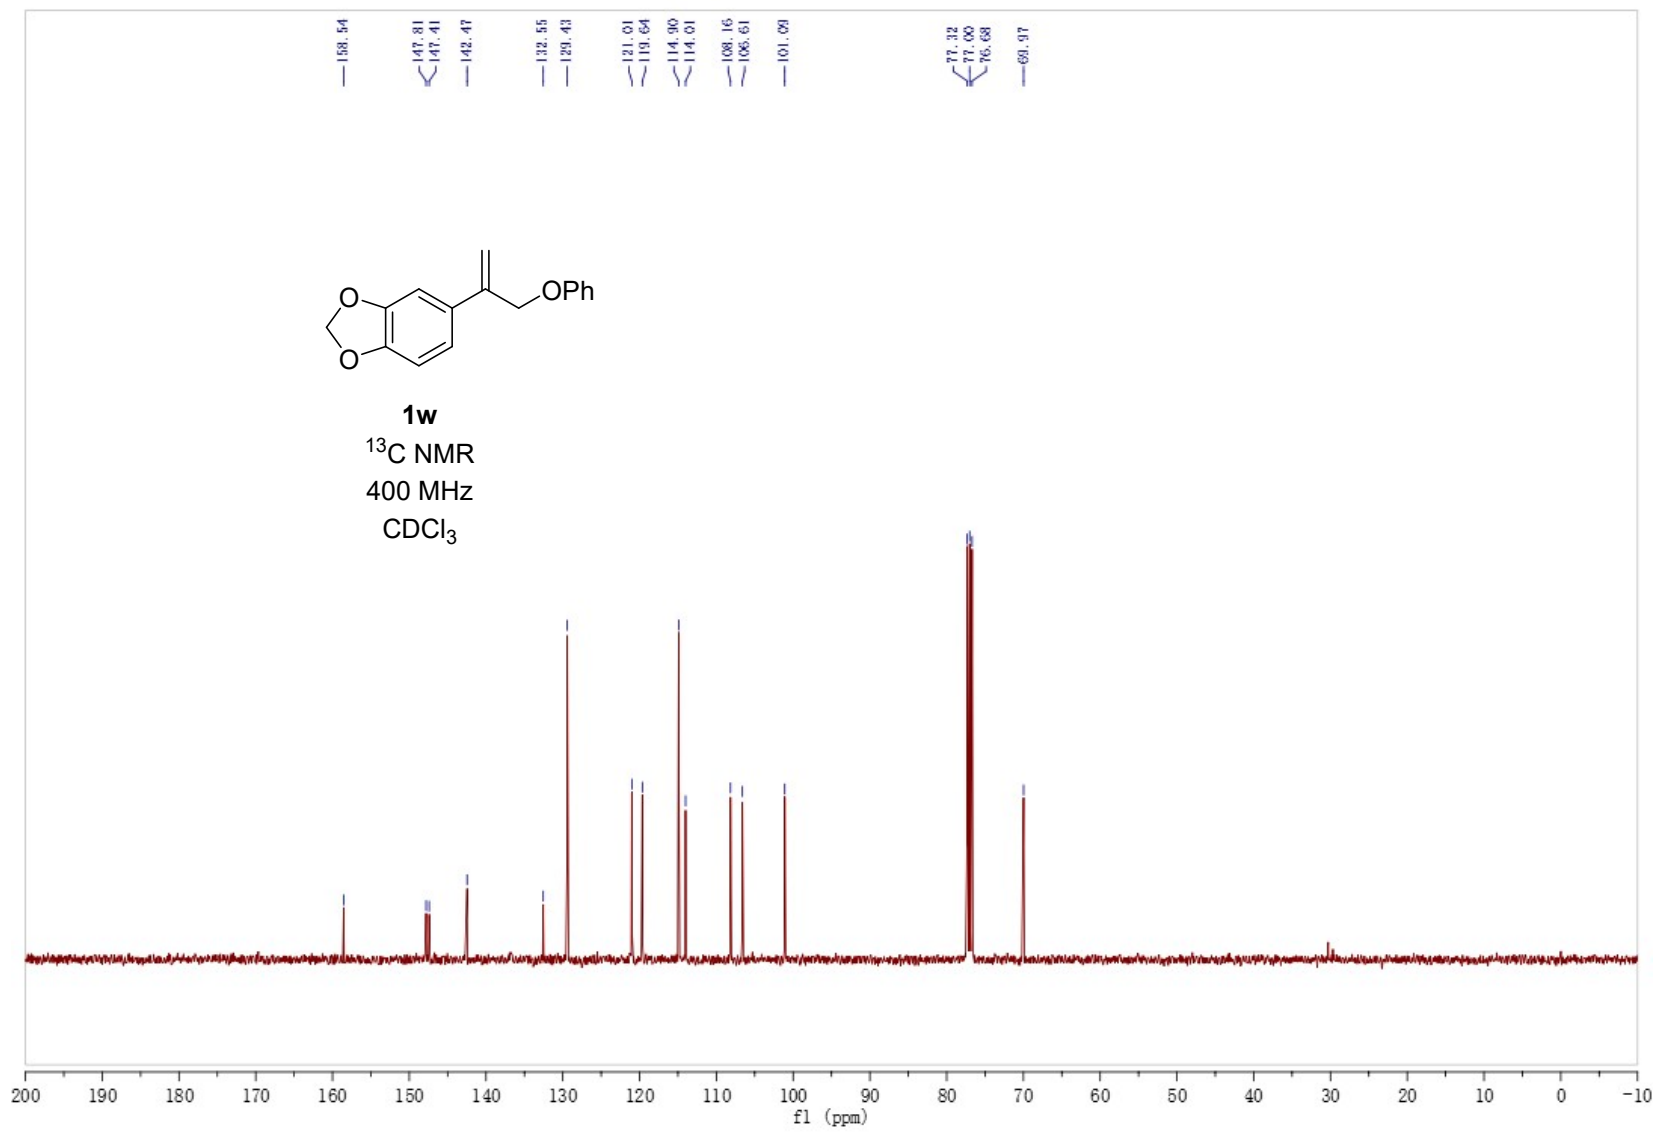

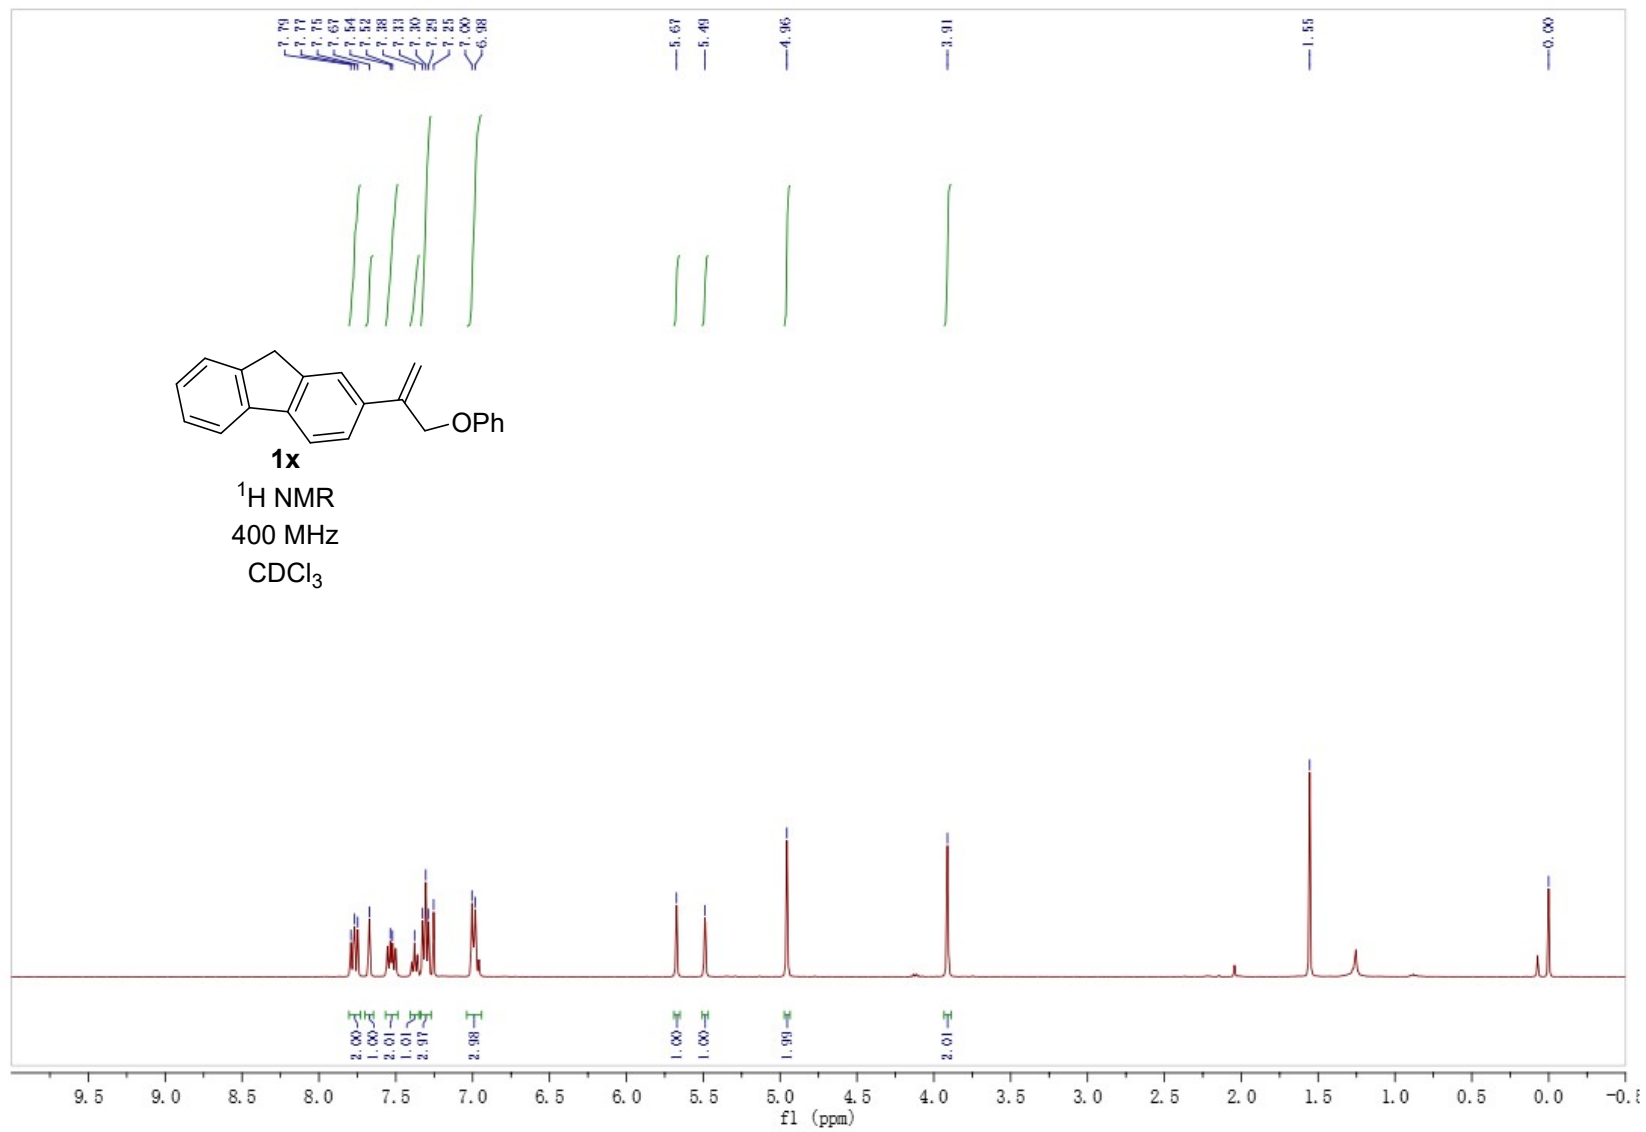

S83

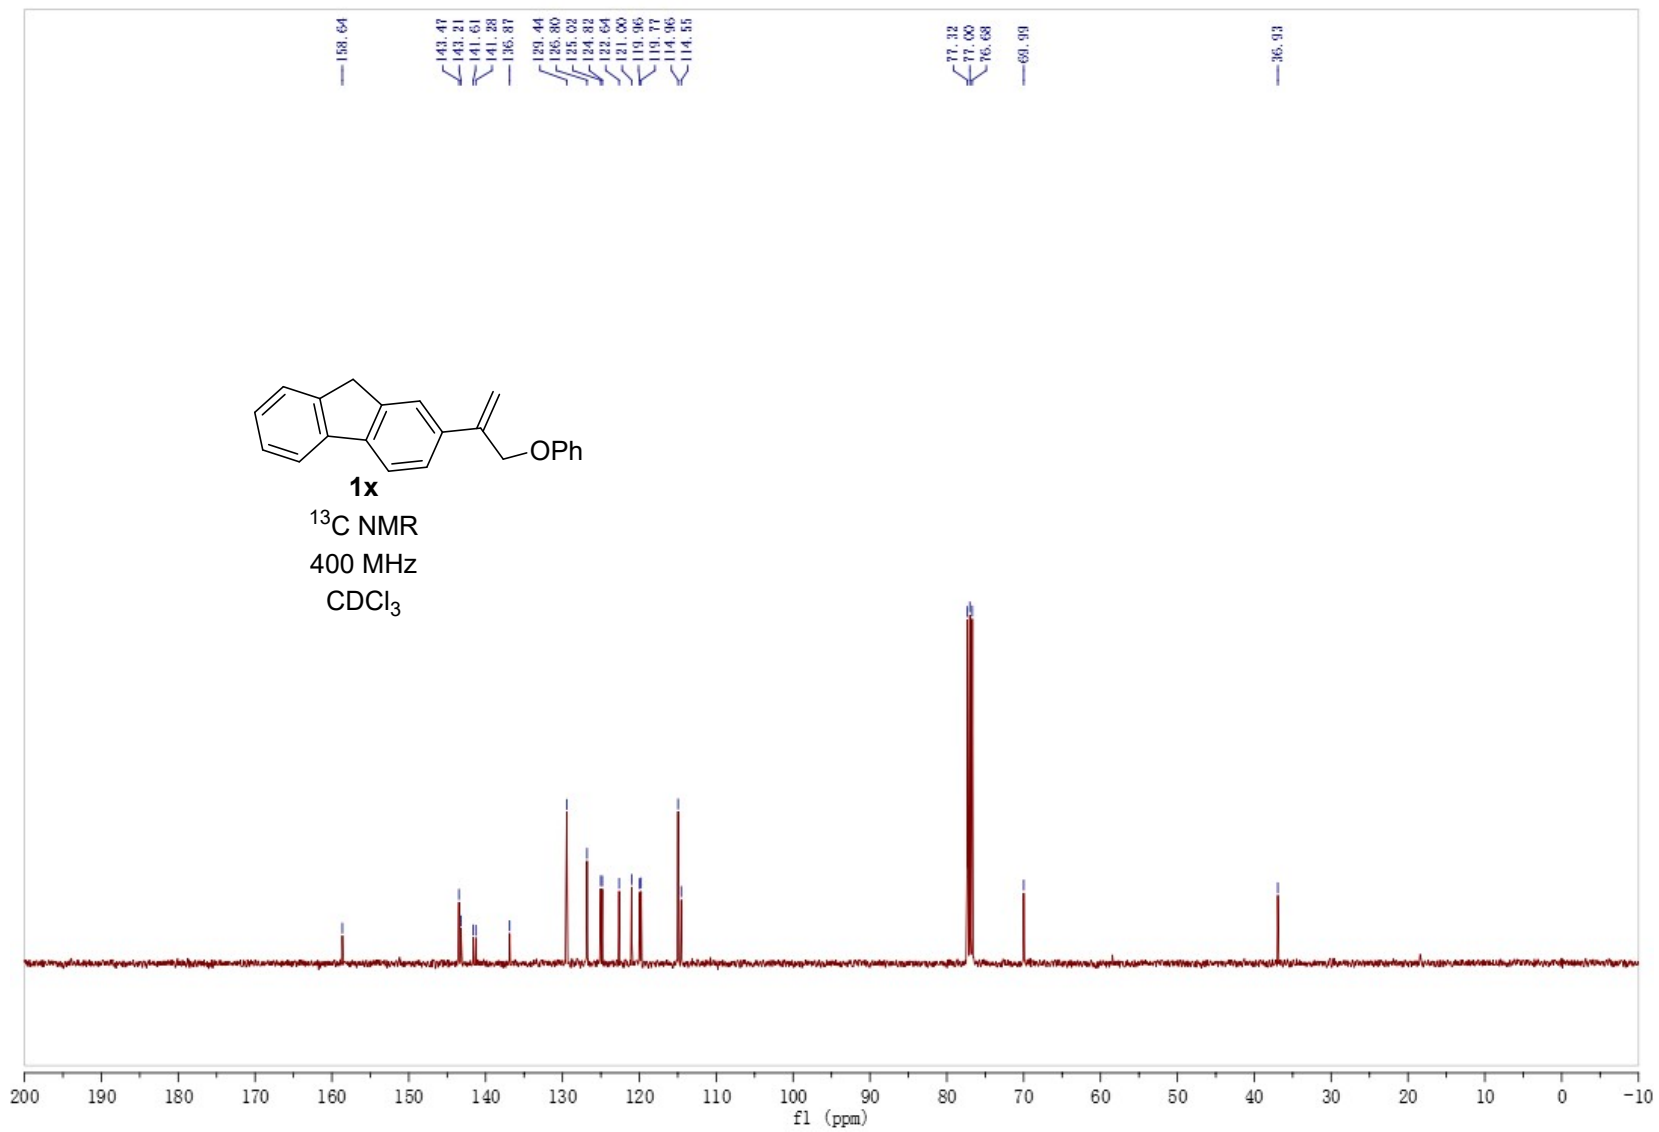

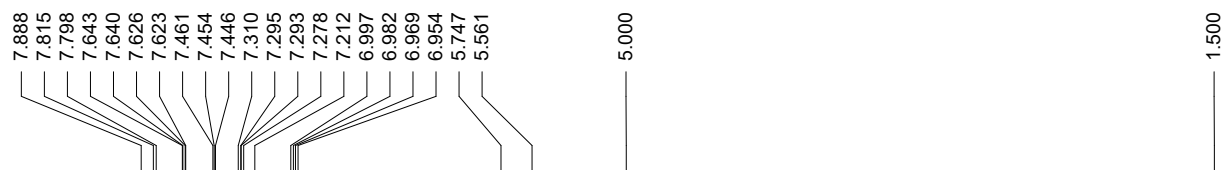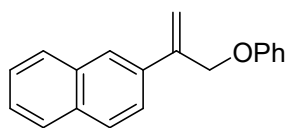

**1y**  
<sup>1</sup>H NMR  
 500 MHz  
 CDCl<sub>3</sub>

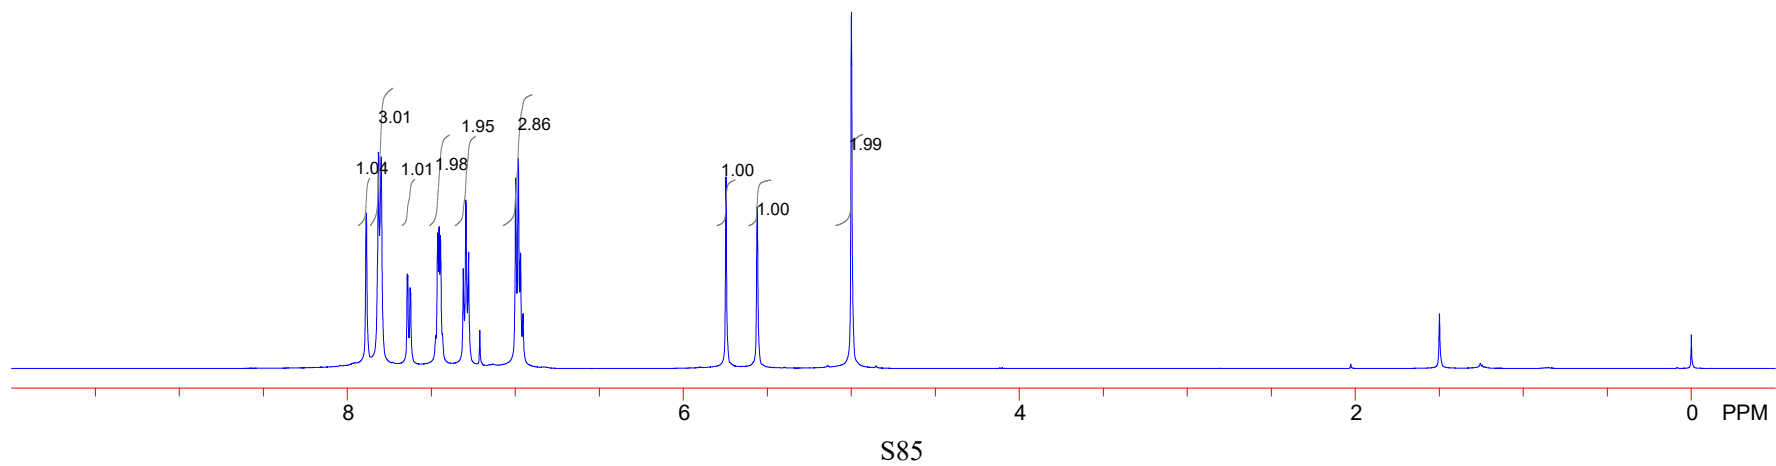

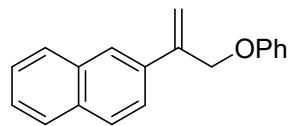

**1y**

<sup>13</sup>C NMR  
500 MHz  
CDCl<sub>3</sub>

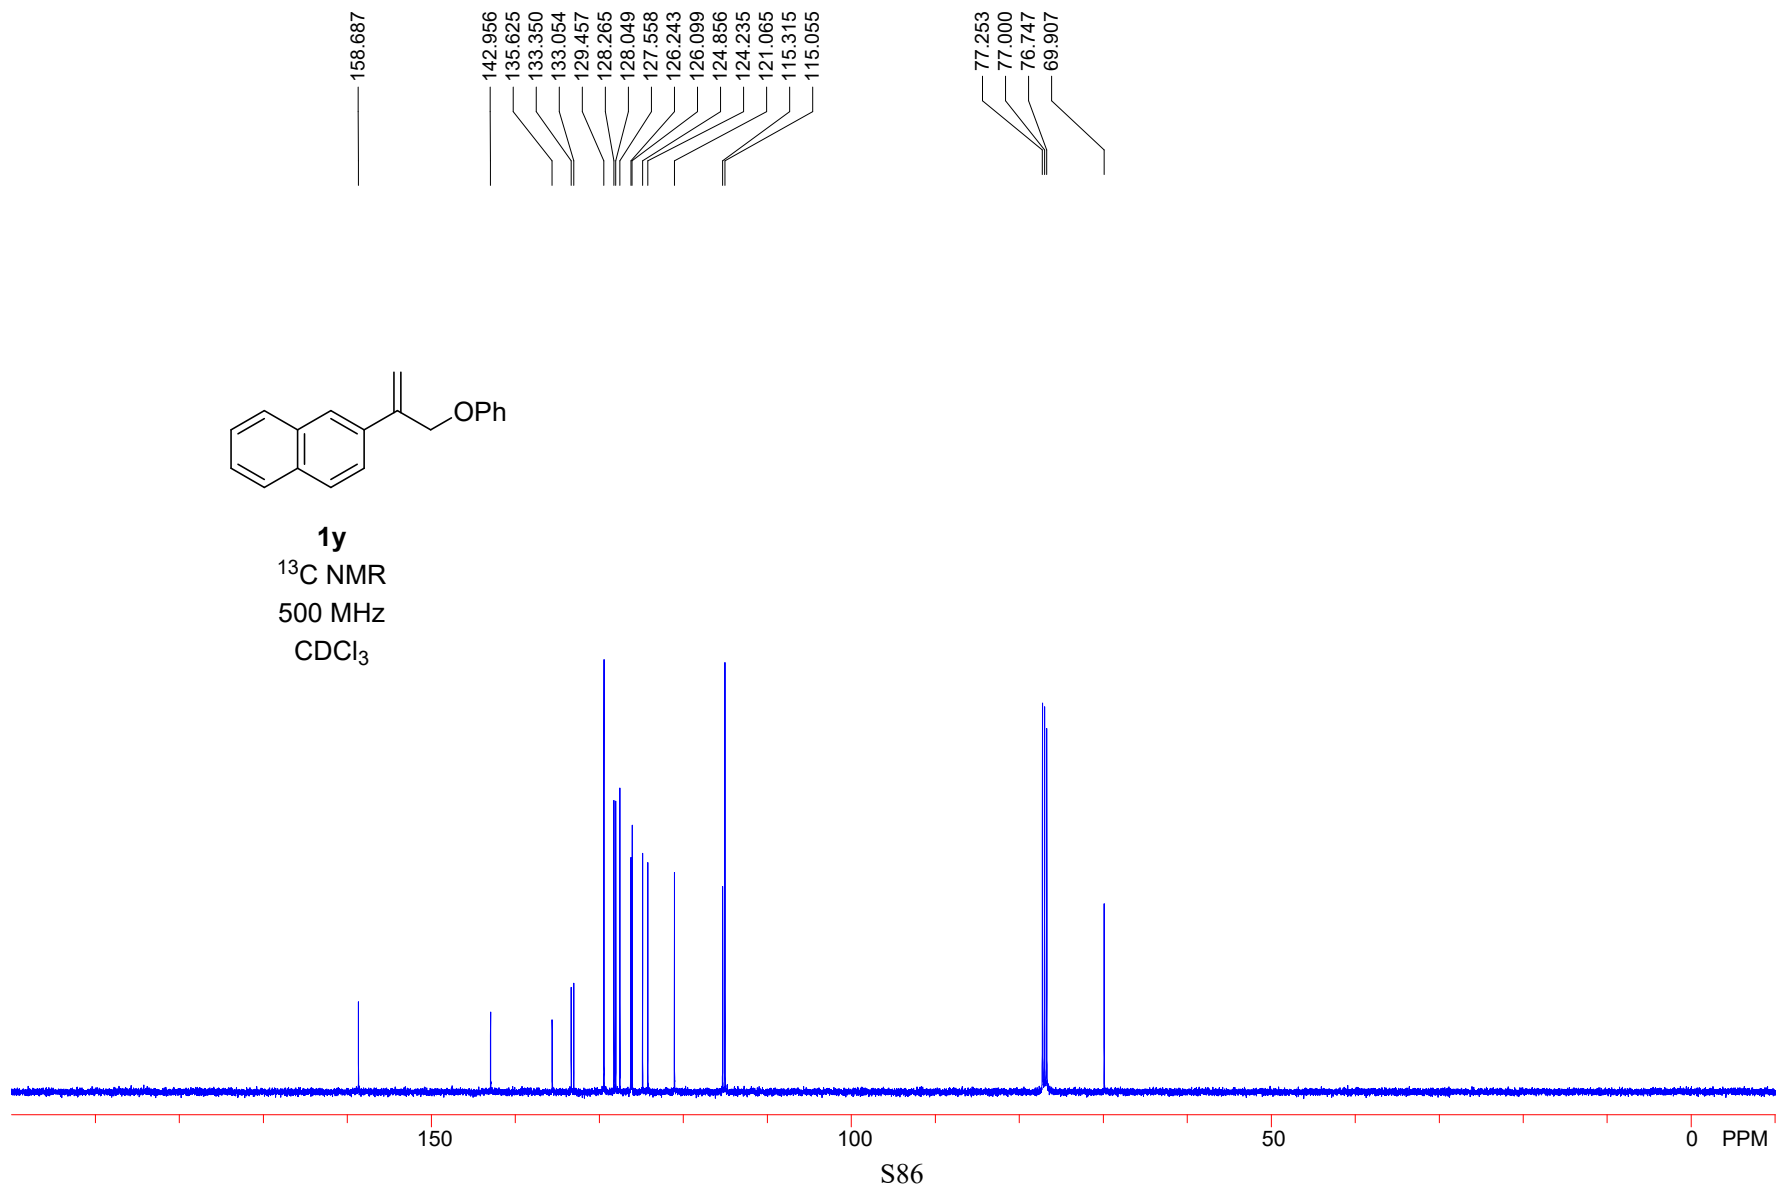

7.299  
7.283  
7.273  
7.267  
7.198  
7.197  
7.188  
7.187  
7.119  
7.113  
6.989  
6.975  
6.961  
6.959  
6.949  
6.947  
5.616  
5.338  
4.841

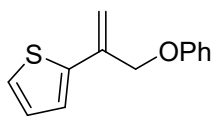

**1z**

<sup>1</sup>H NMR  
500 MHz  
CDCl<sub>3</sub>

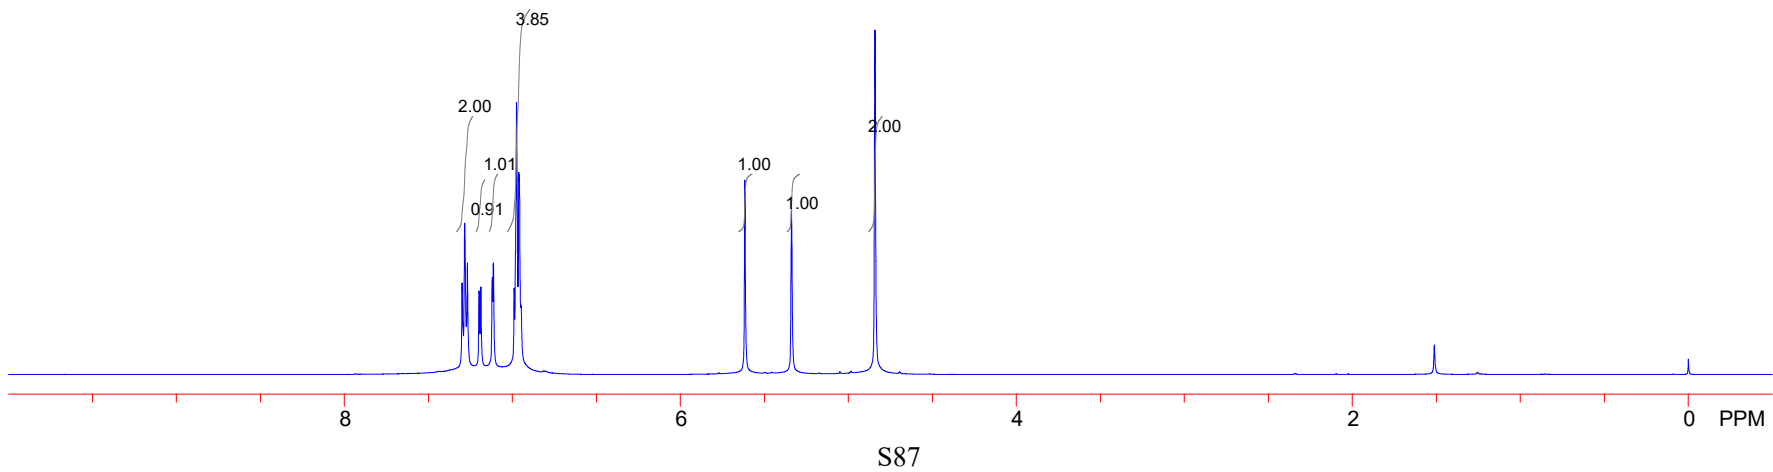

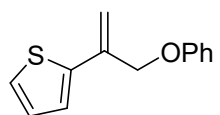

**1z**

<sup>13</sup>C NMR  
500 MHz  
CDCl<sub>3</sub>

158.499

141.894

137.019

129.457

127.406

124.654

123.968

121.151

114.954

113.308

77.253

77.000

76.747

69.749

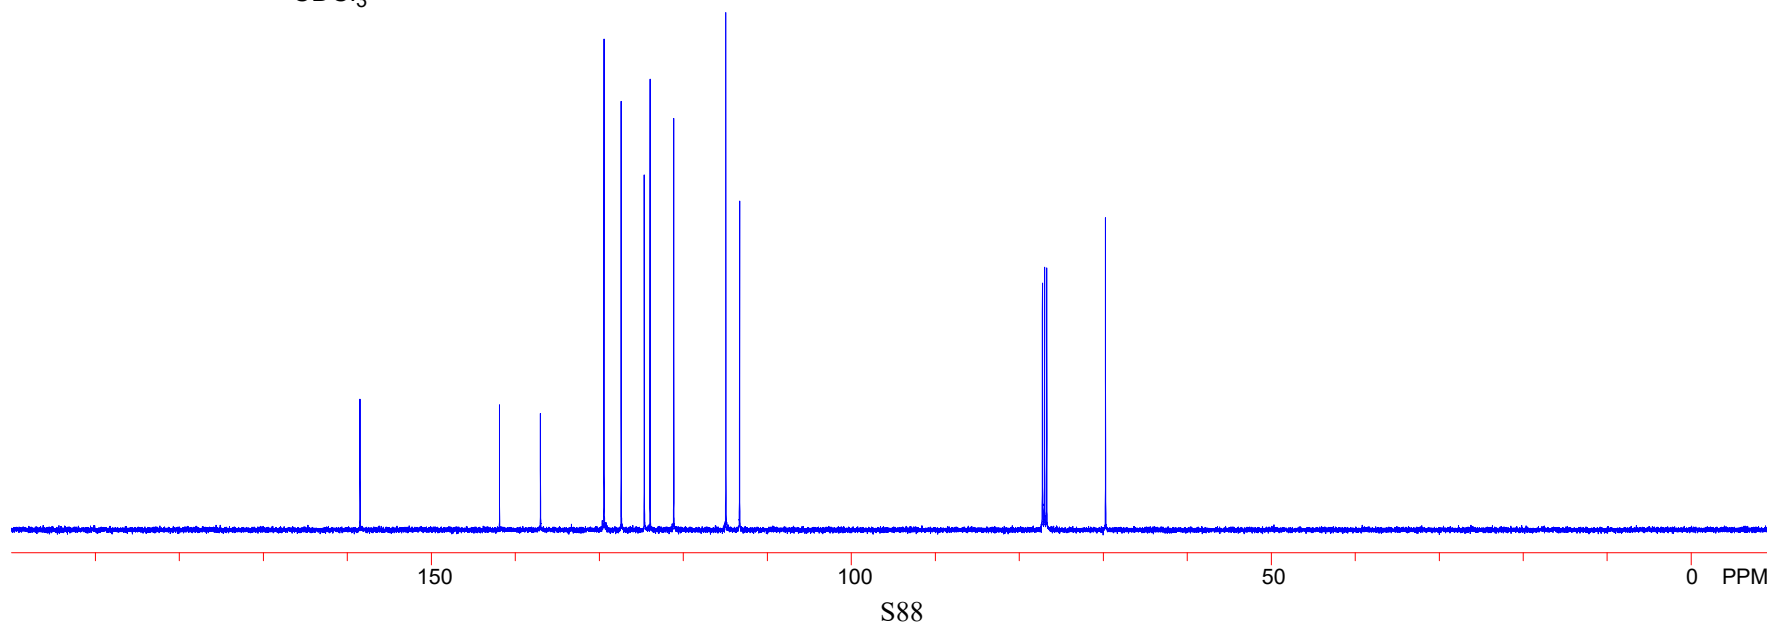



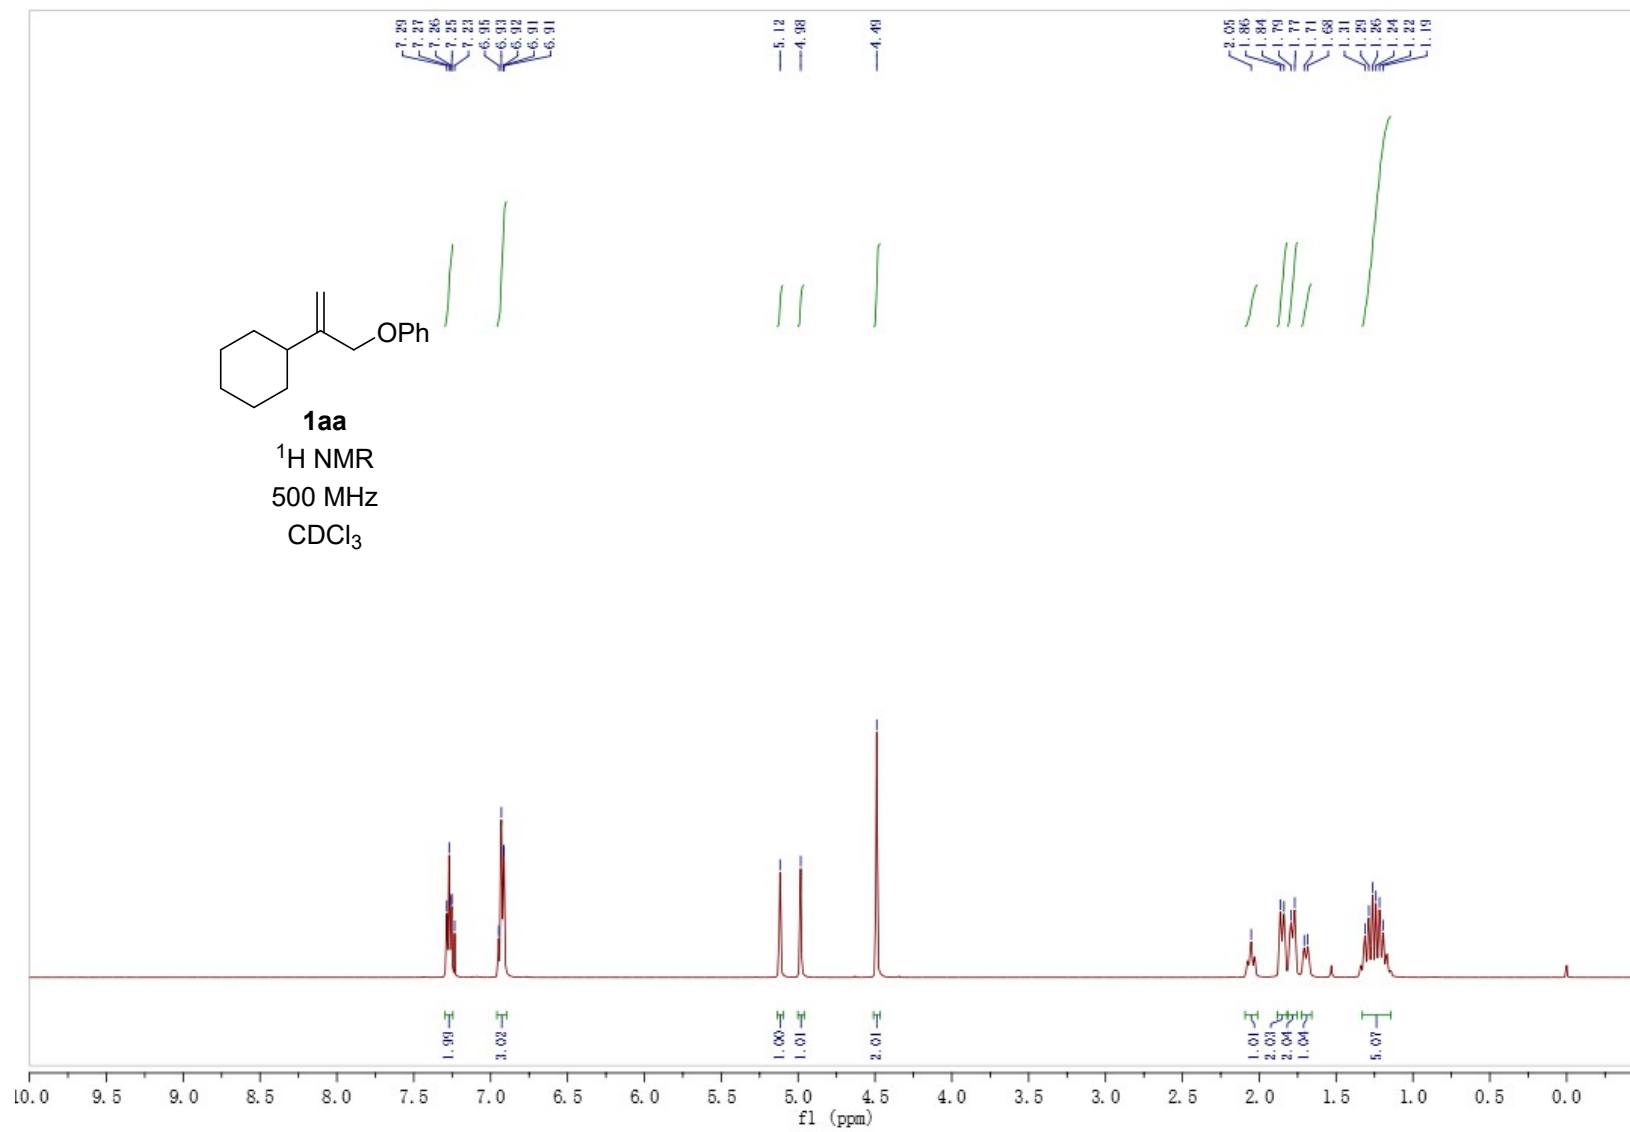

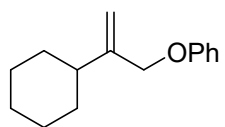

**1aa**

<sup>13</sup>C NMR  
500 MHz  
CDCl<sub>3</sub>

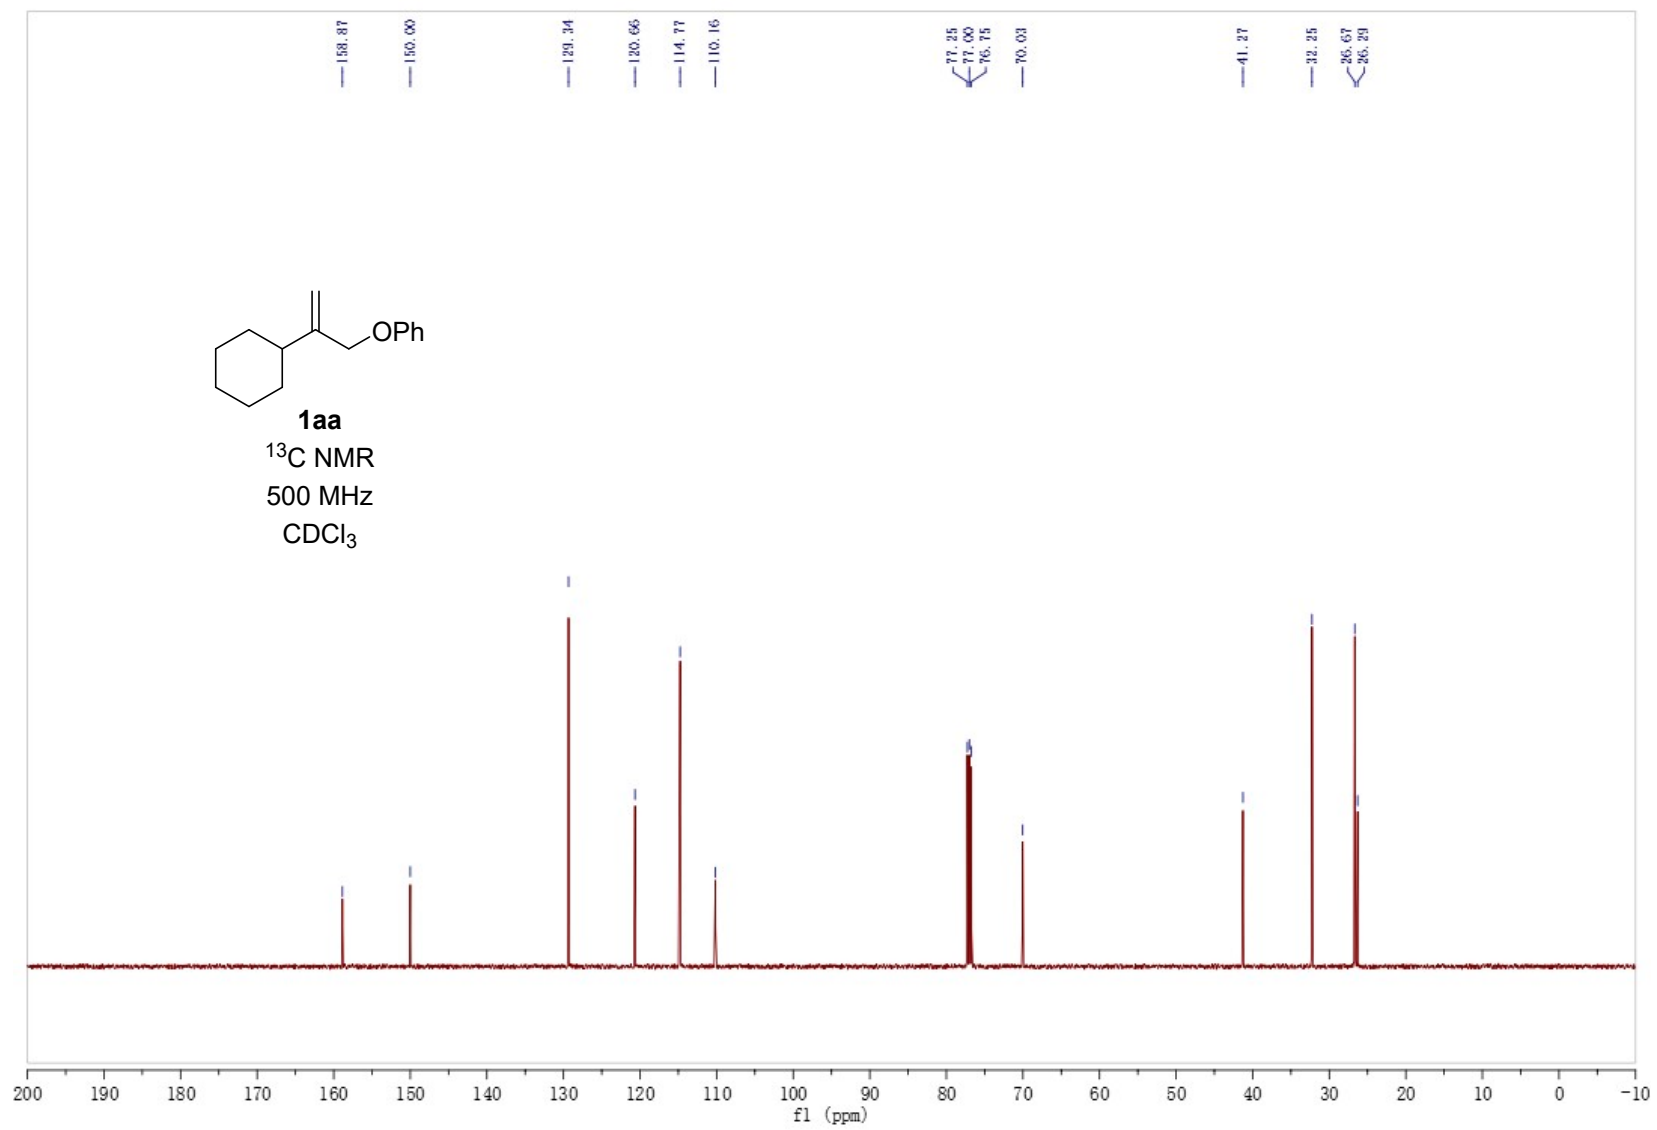

S90

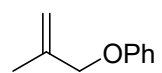

**1ab**

<sup>1</sup>H NMR  
500 MHz  
CDCl<sub>3</sub>

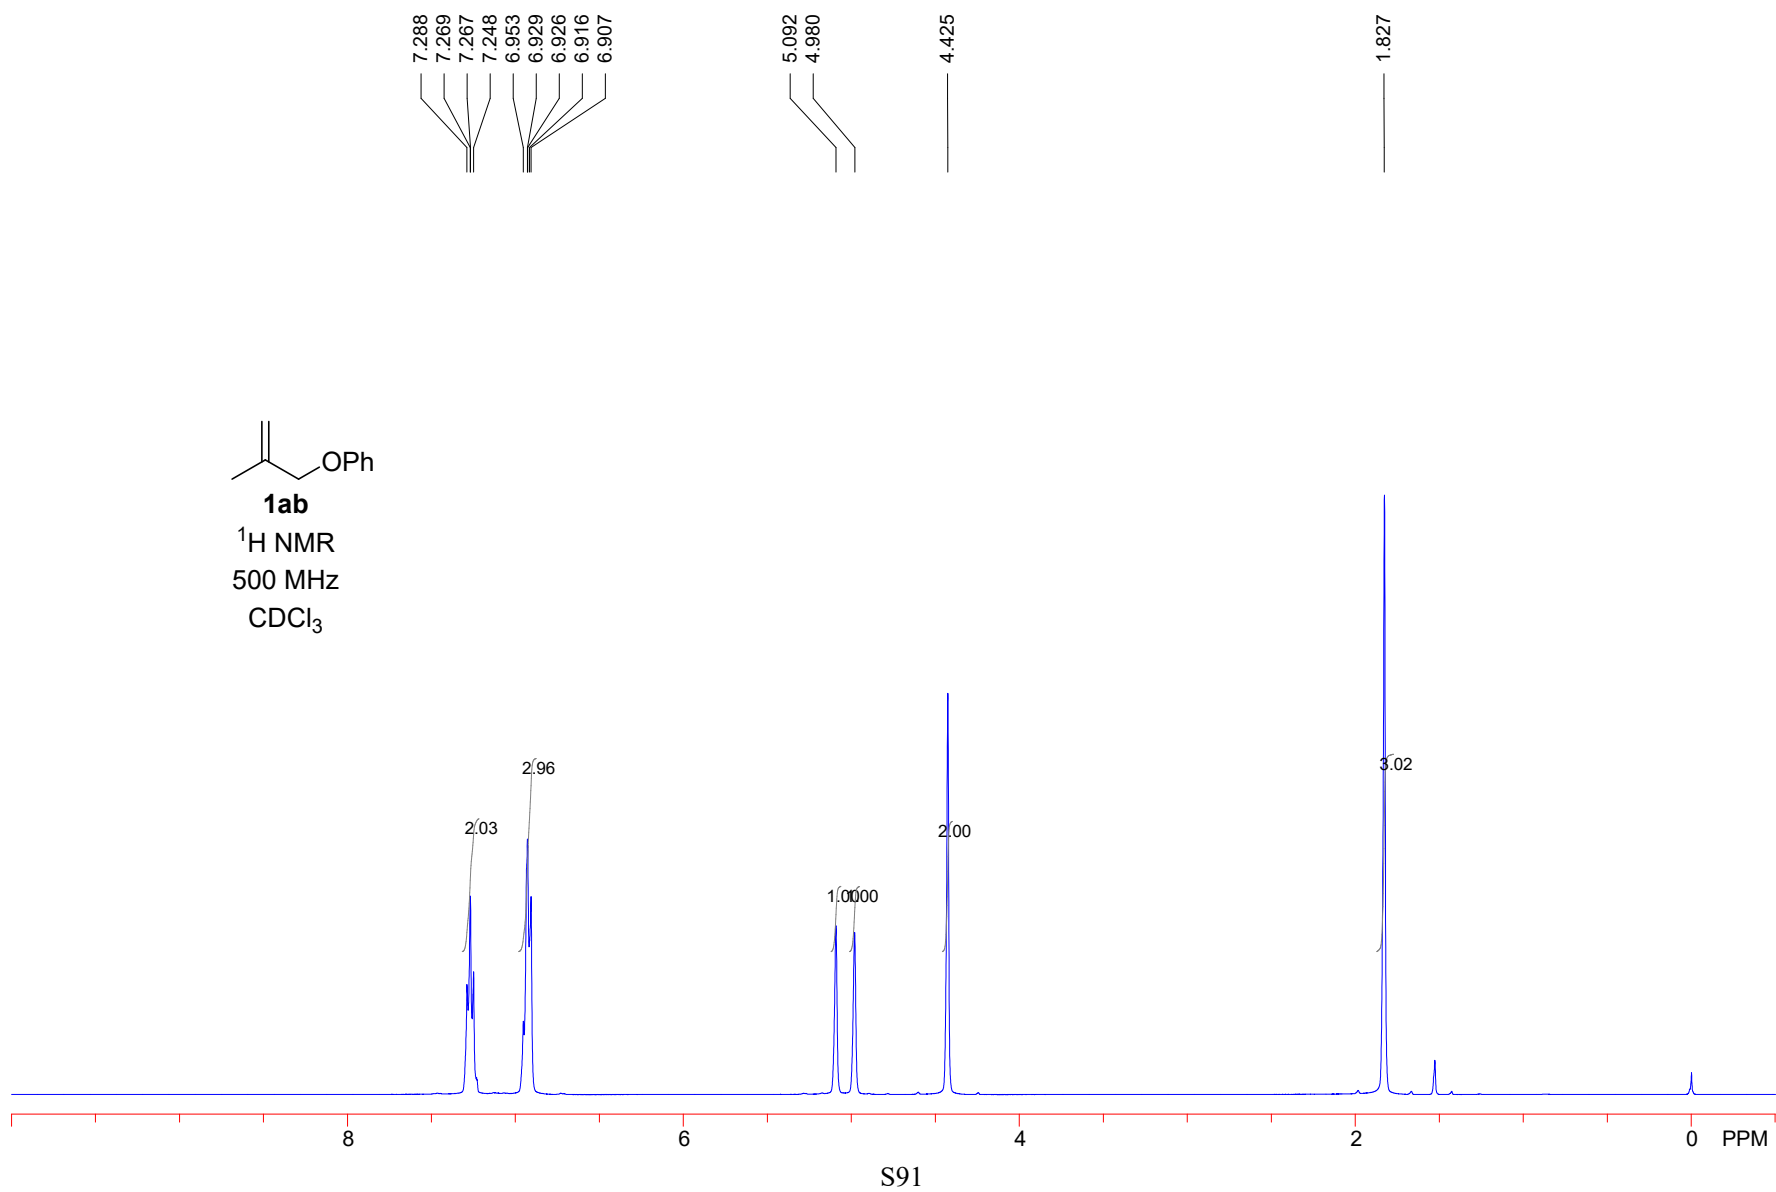

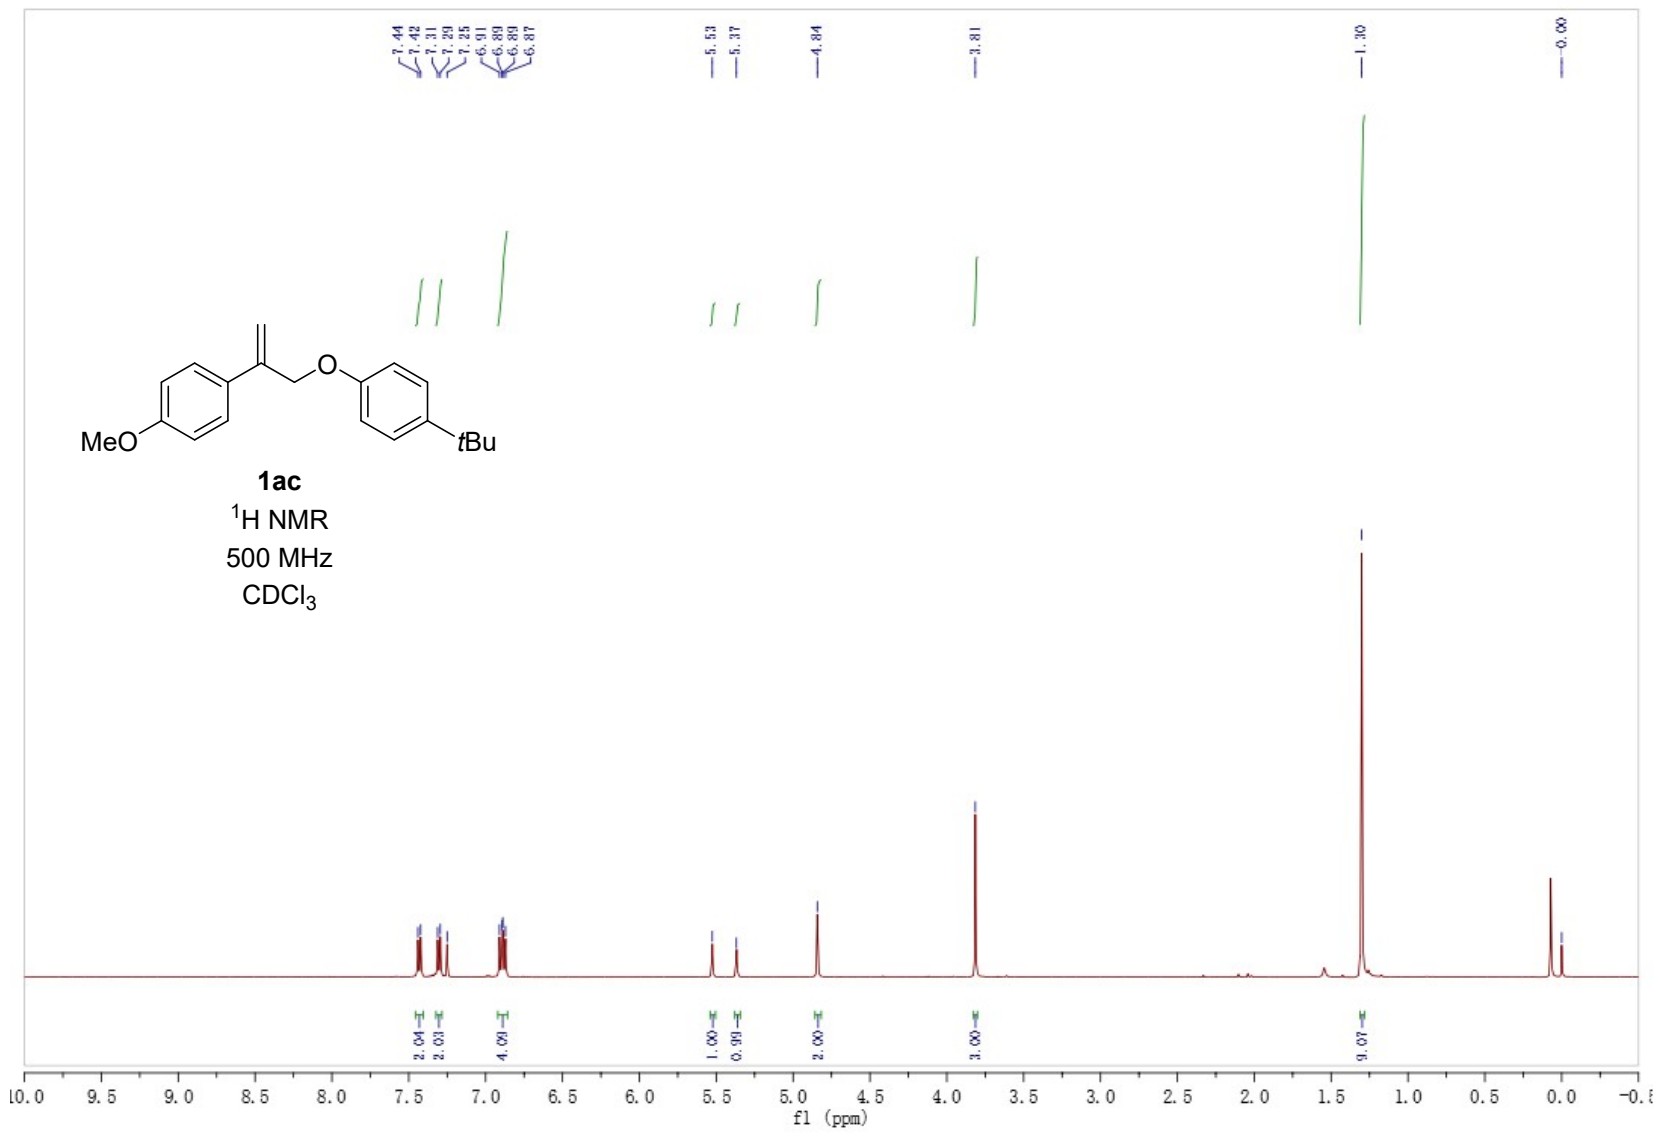

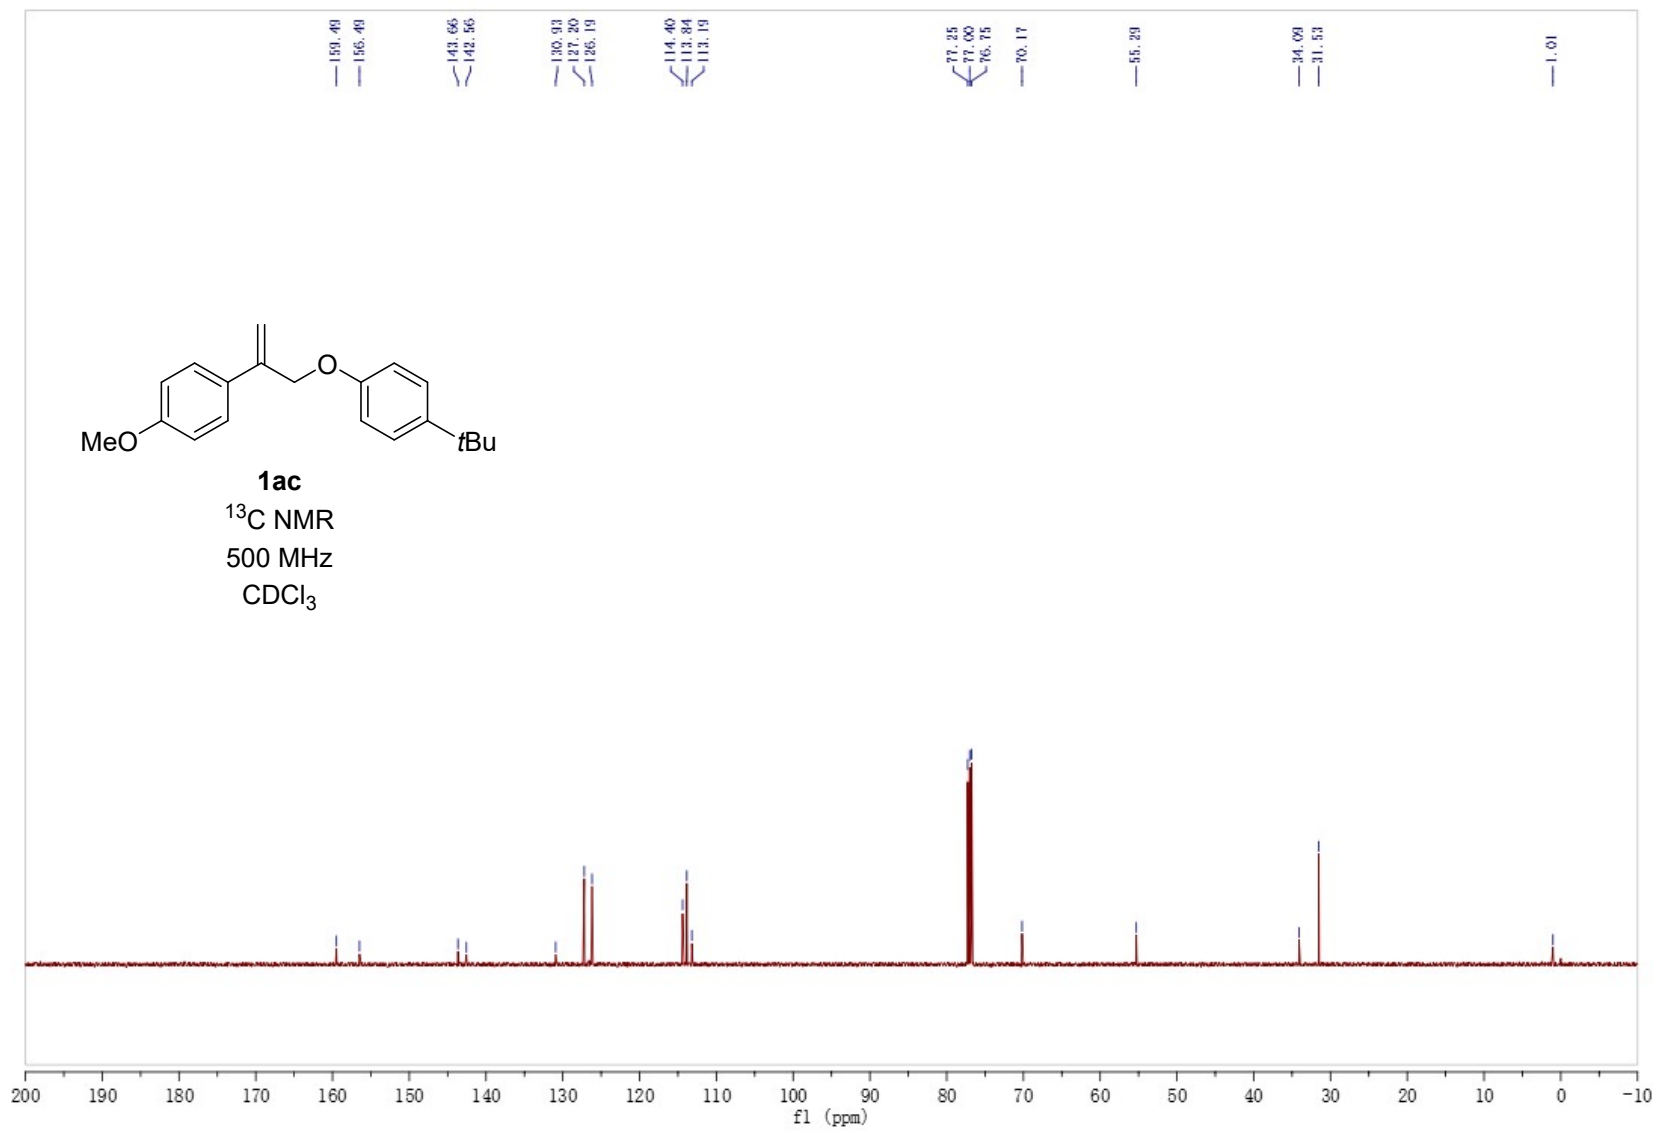



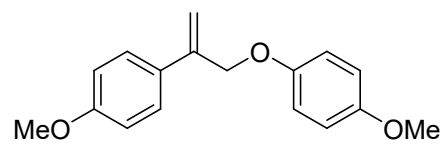

**1ad**

<sup>13</sup>C NMR

500 MHz

CDCl<sub>3</sub>

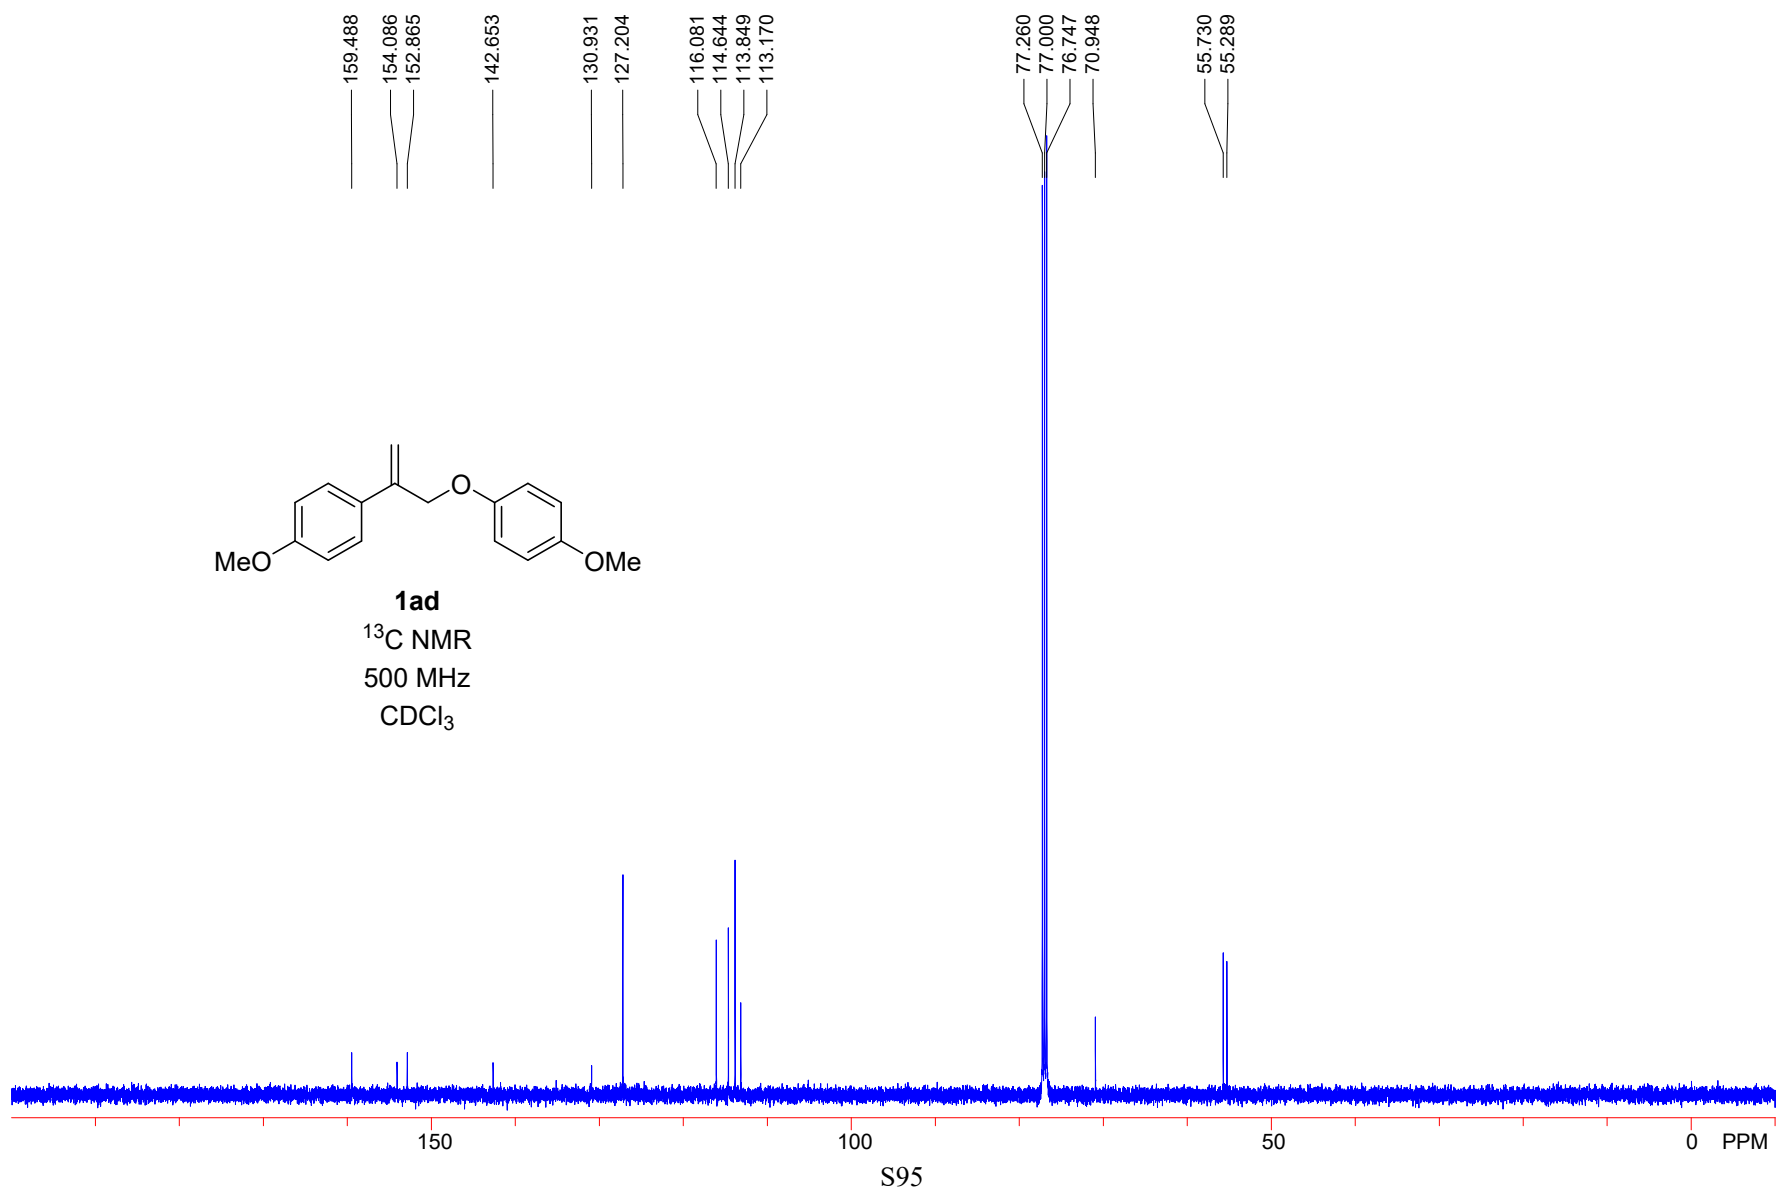

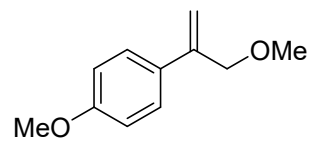

**1ae**

<sup>1</sup>H NMR  
500 MHz  
CDCl<sub>3</sub>

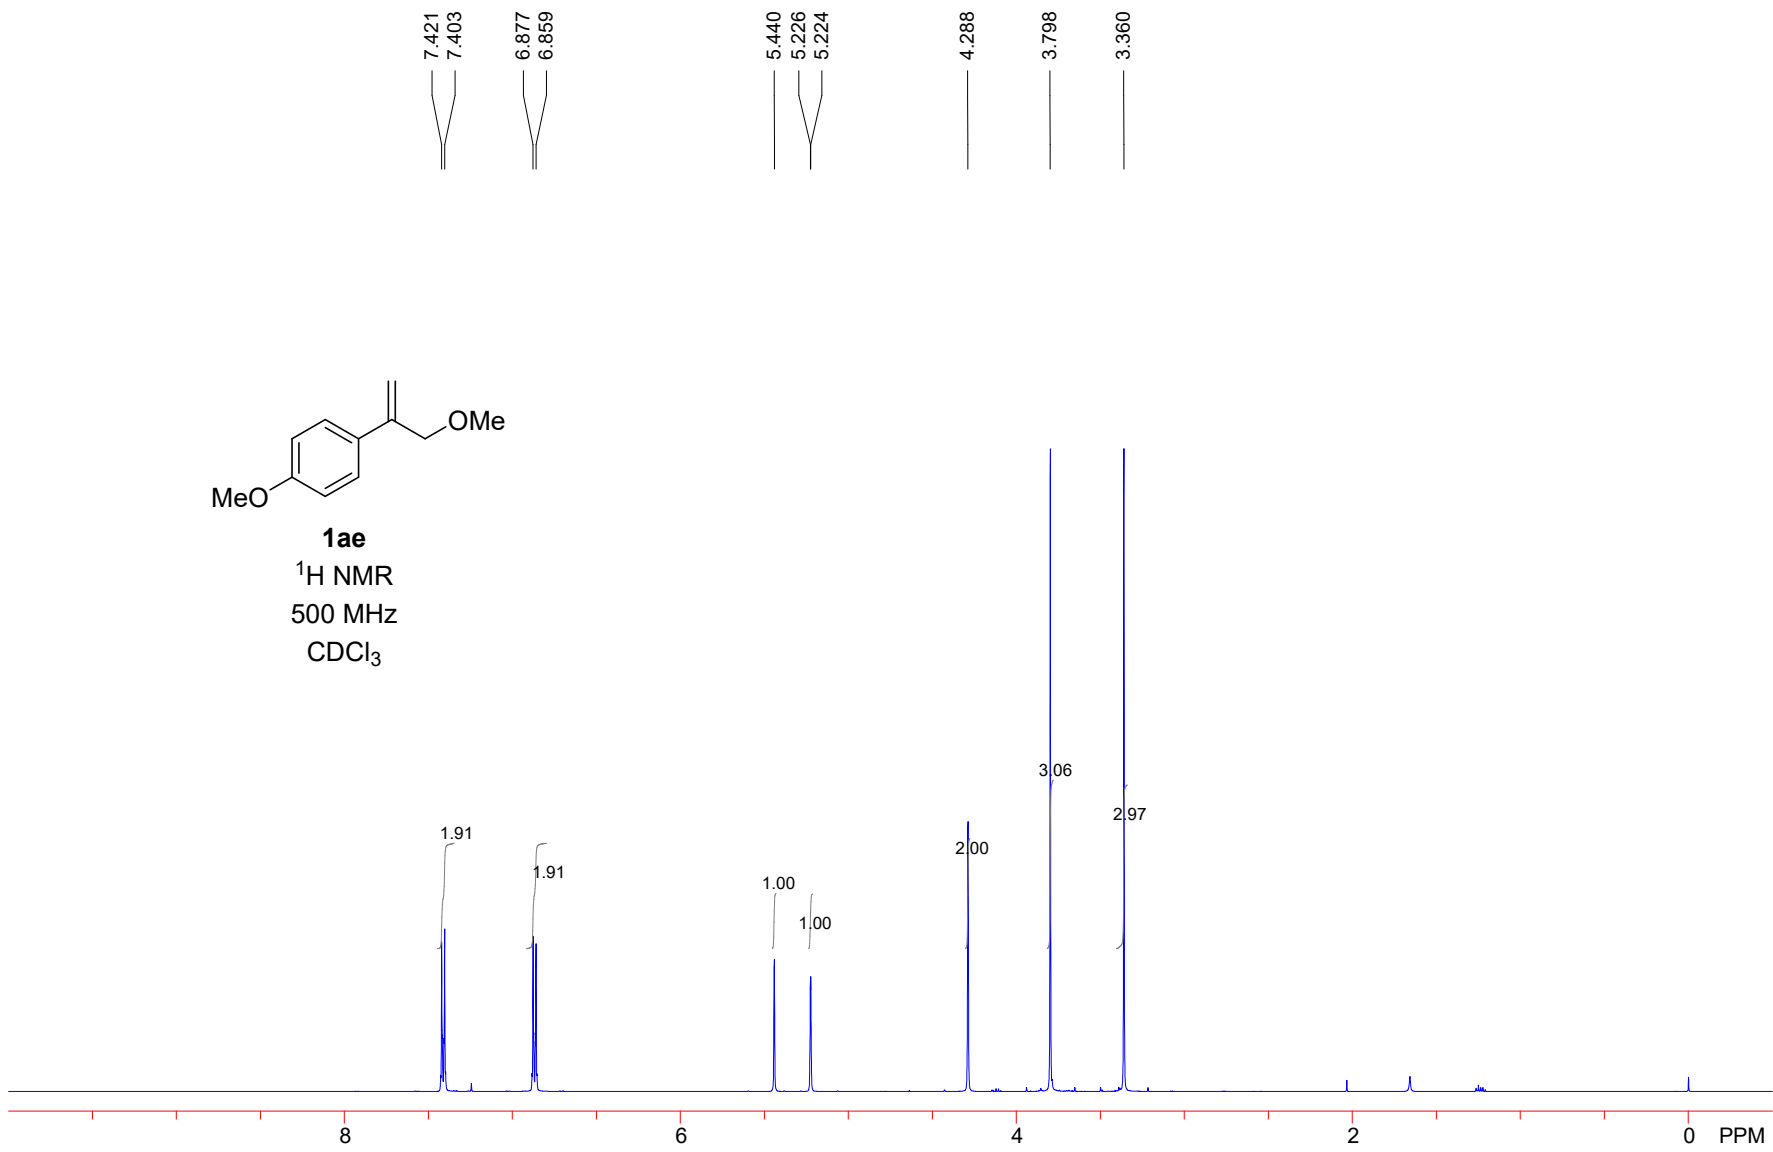

S96



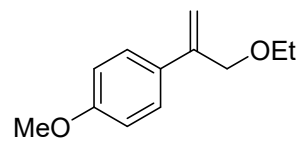

**1af**

<sup>1</sup>H NMR  
500 MHz  
CDCl<sub>3</sub>

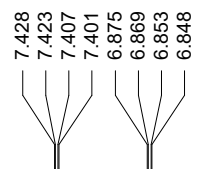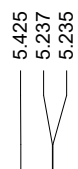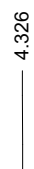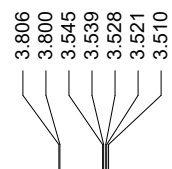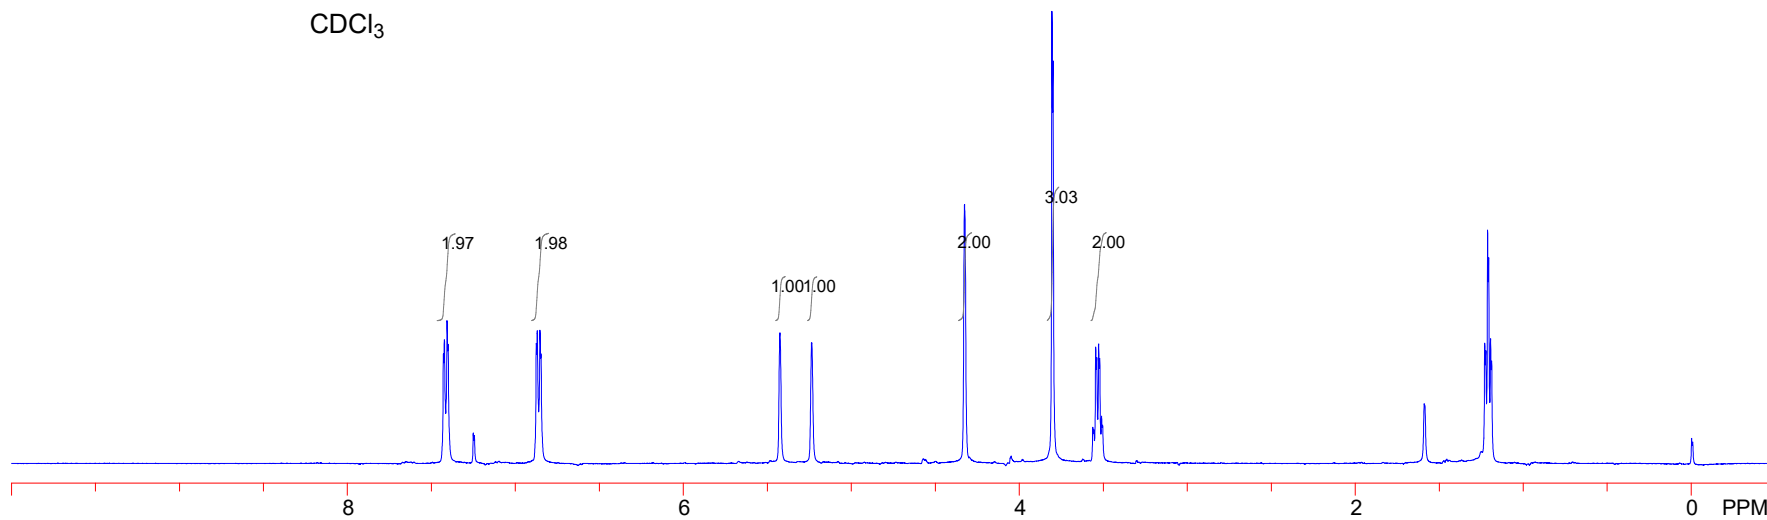

S97

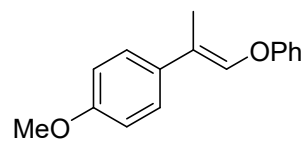

**2a**

<sup>1</sup>H NMR  
500 MHz  
CDCl<sub>3</sub>

7.327  
7.309  
7.295  
7.055  
7.051  
7.050  
7.041  
7.039  
7.034  
7.033  
6.886  
6.881  
6.868  
6.760  
6.758

3.797

2.111  
2.109

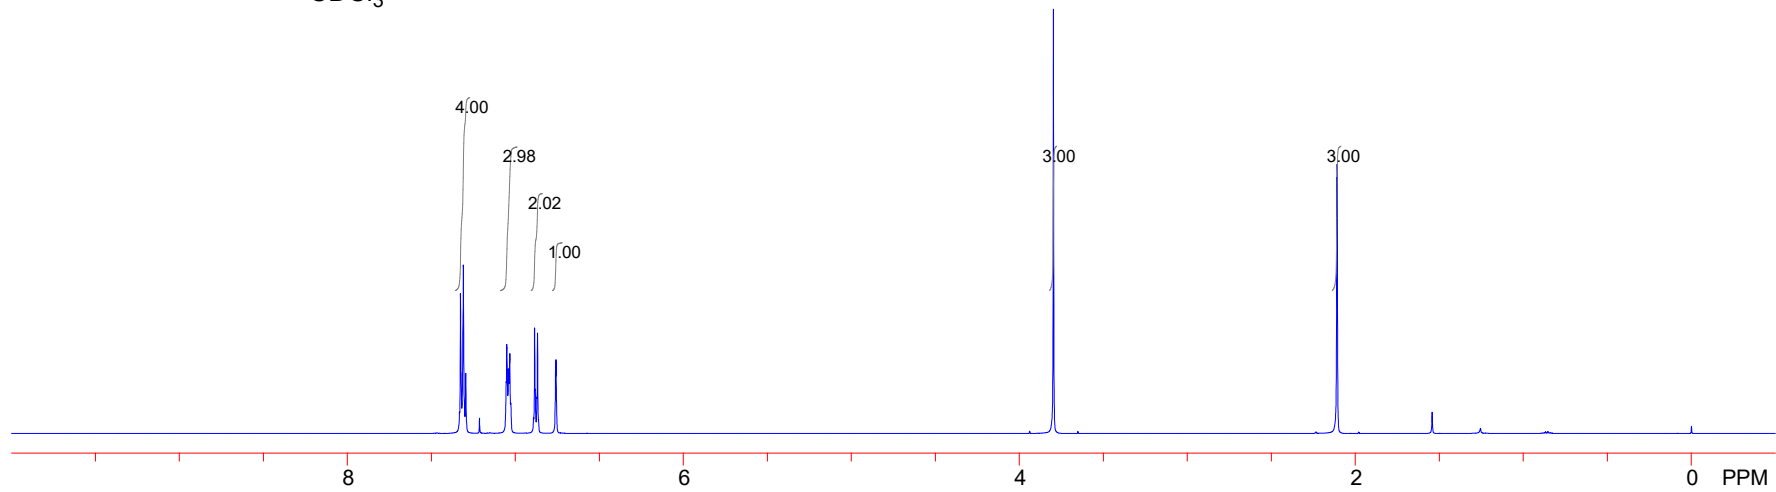

S98

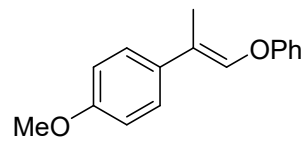

**2a**

<sup>13</sup>C NMR  
500 MHz  
CDCl<sub>3</sub>

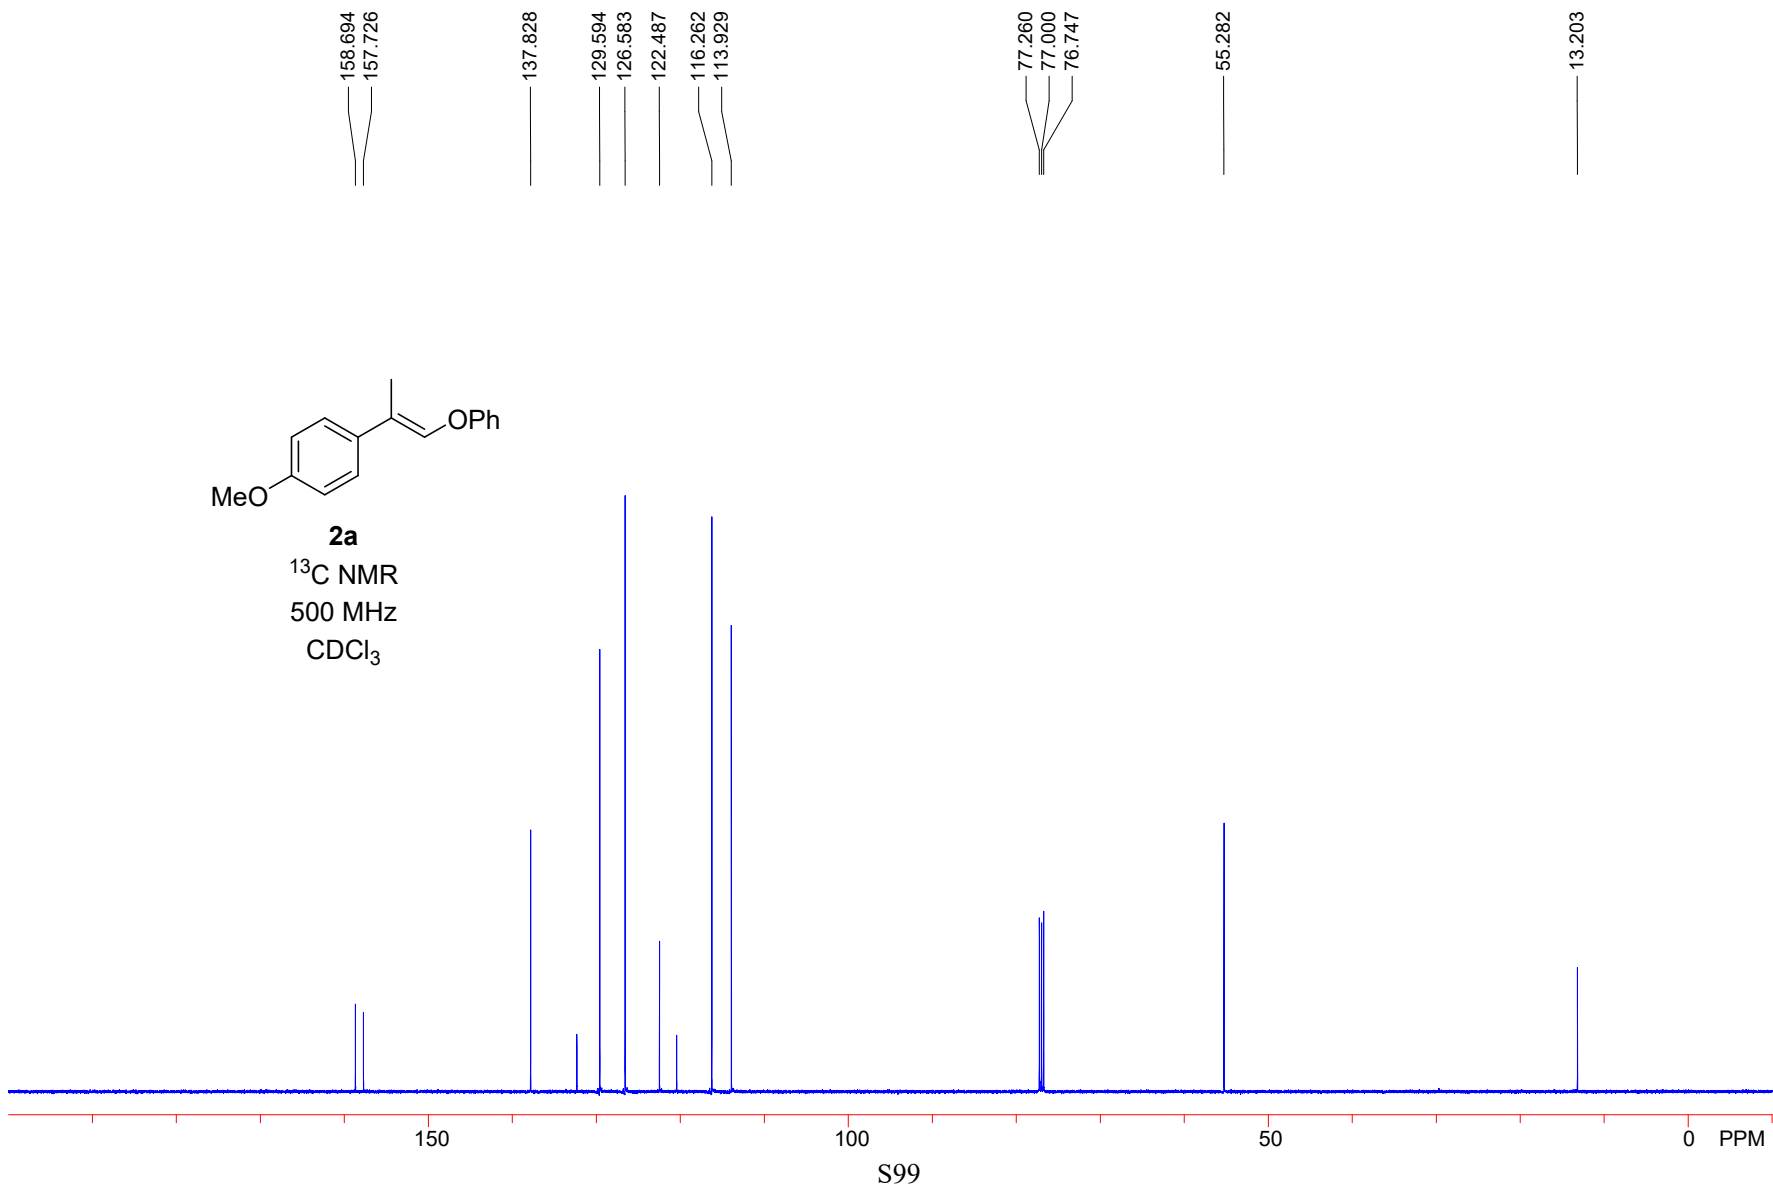

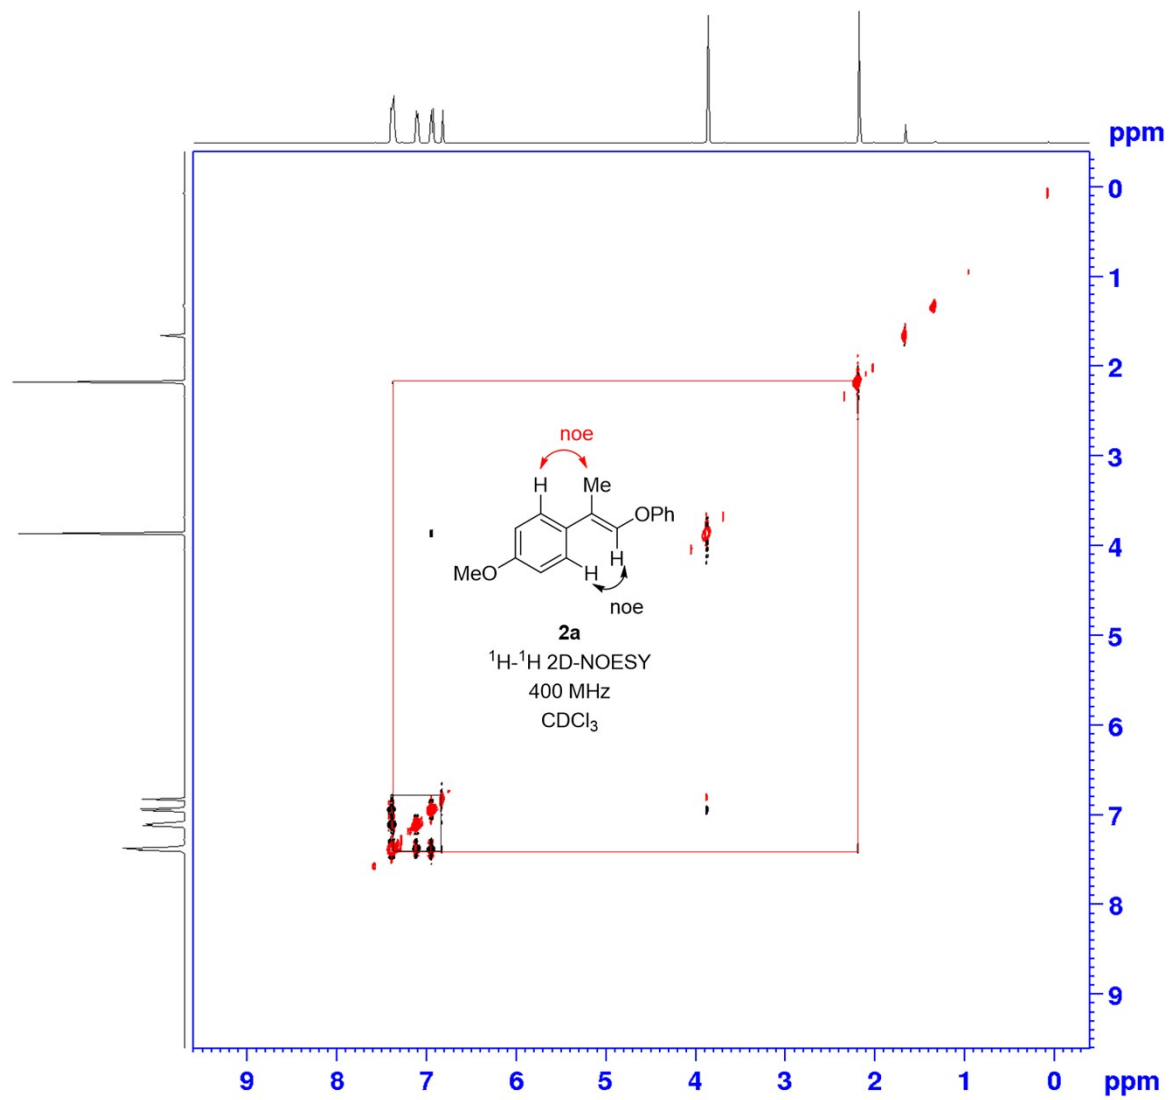

S100

7.402  
7.387  
7.348  
7.339  
7.333  
7.324  
7.308  
7.259  
7.244  
7.072  
7.063  
7.059  
7.046  
6.848  
6.846

2.146  
2.144

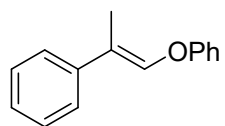

**2b**

<sup>1</sup>H NMR  
500 MHz  
CDCl<sub>3</sub>

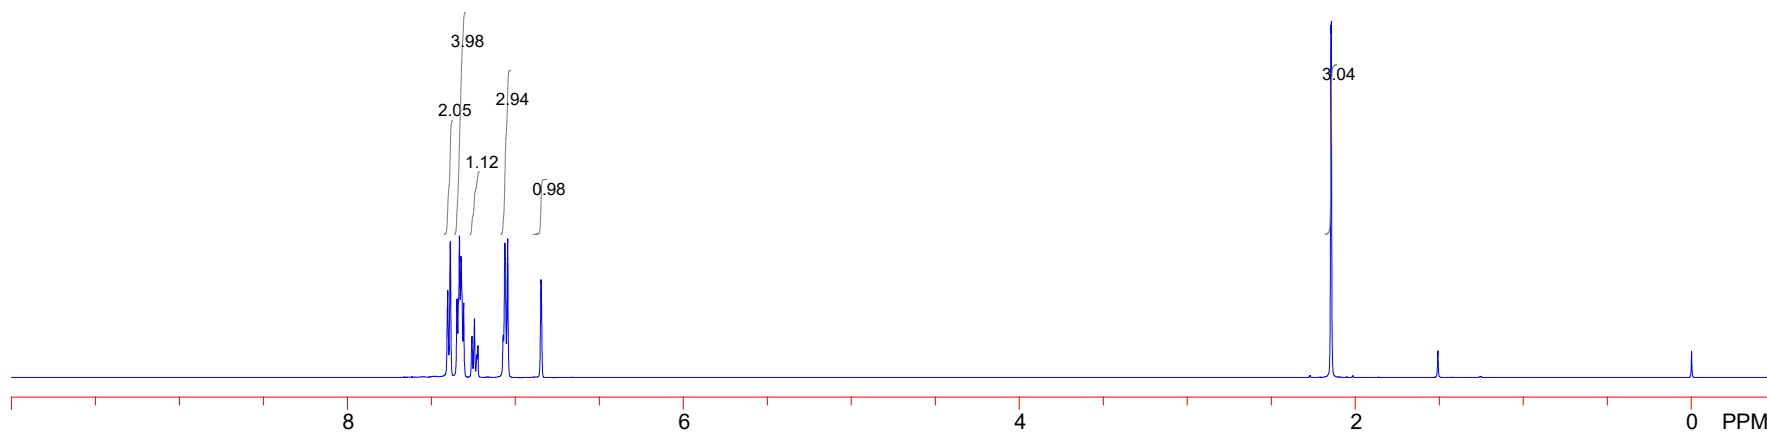

S101

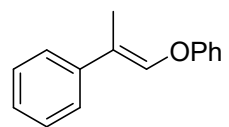

**2b**

<sup>13</sup>C NMR  
500 MHz  
CDCl<sub>3</sub>

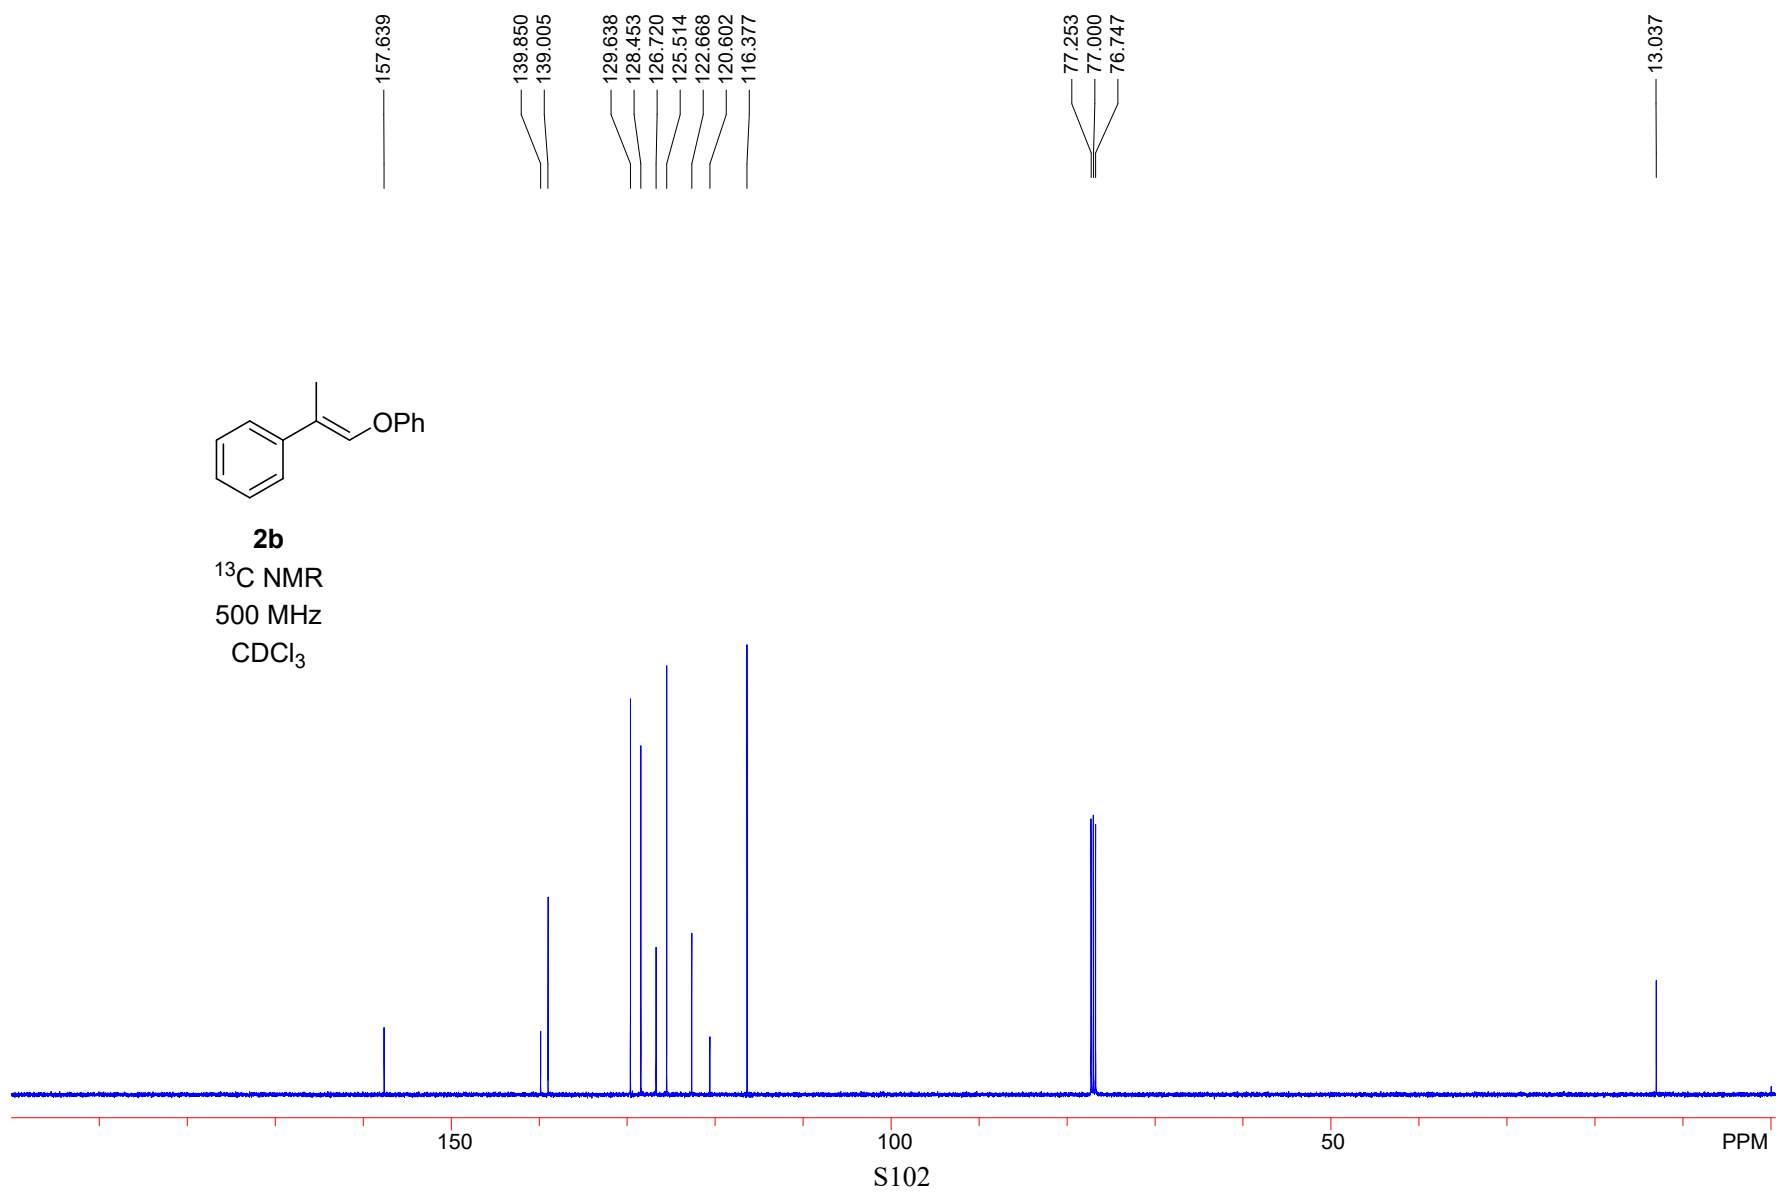

7.331  
7.315  
7.298  
7.281  
7.150  
7.135  
7.060  
7.053  
7.049  
7.047  
7.036  
6.813  
6.811

2.343  
2.124  
2.121

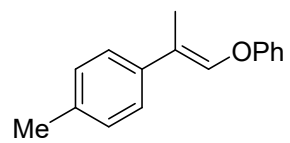

**2c**

<sup>1</sup>H NMR  
500 MHz  
CDCl<sub>3</sub>

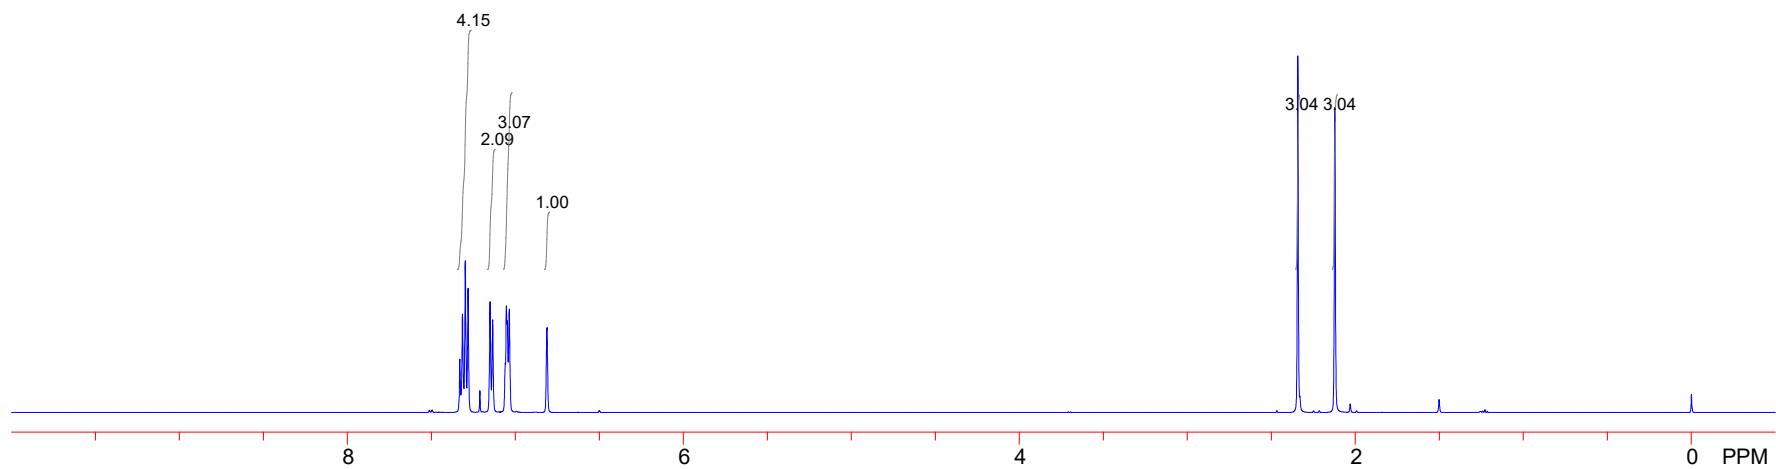

S103

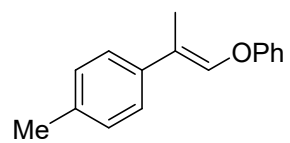

**2c**

$^{13}\text{C}$  NMR  
500 MHz  
 $\text{CDCl}_3$

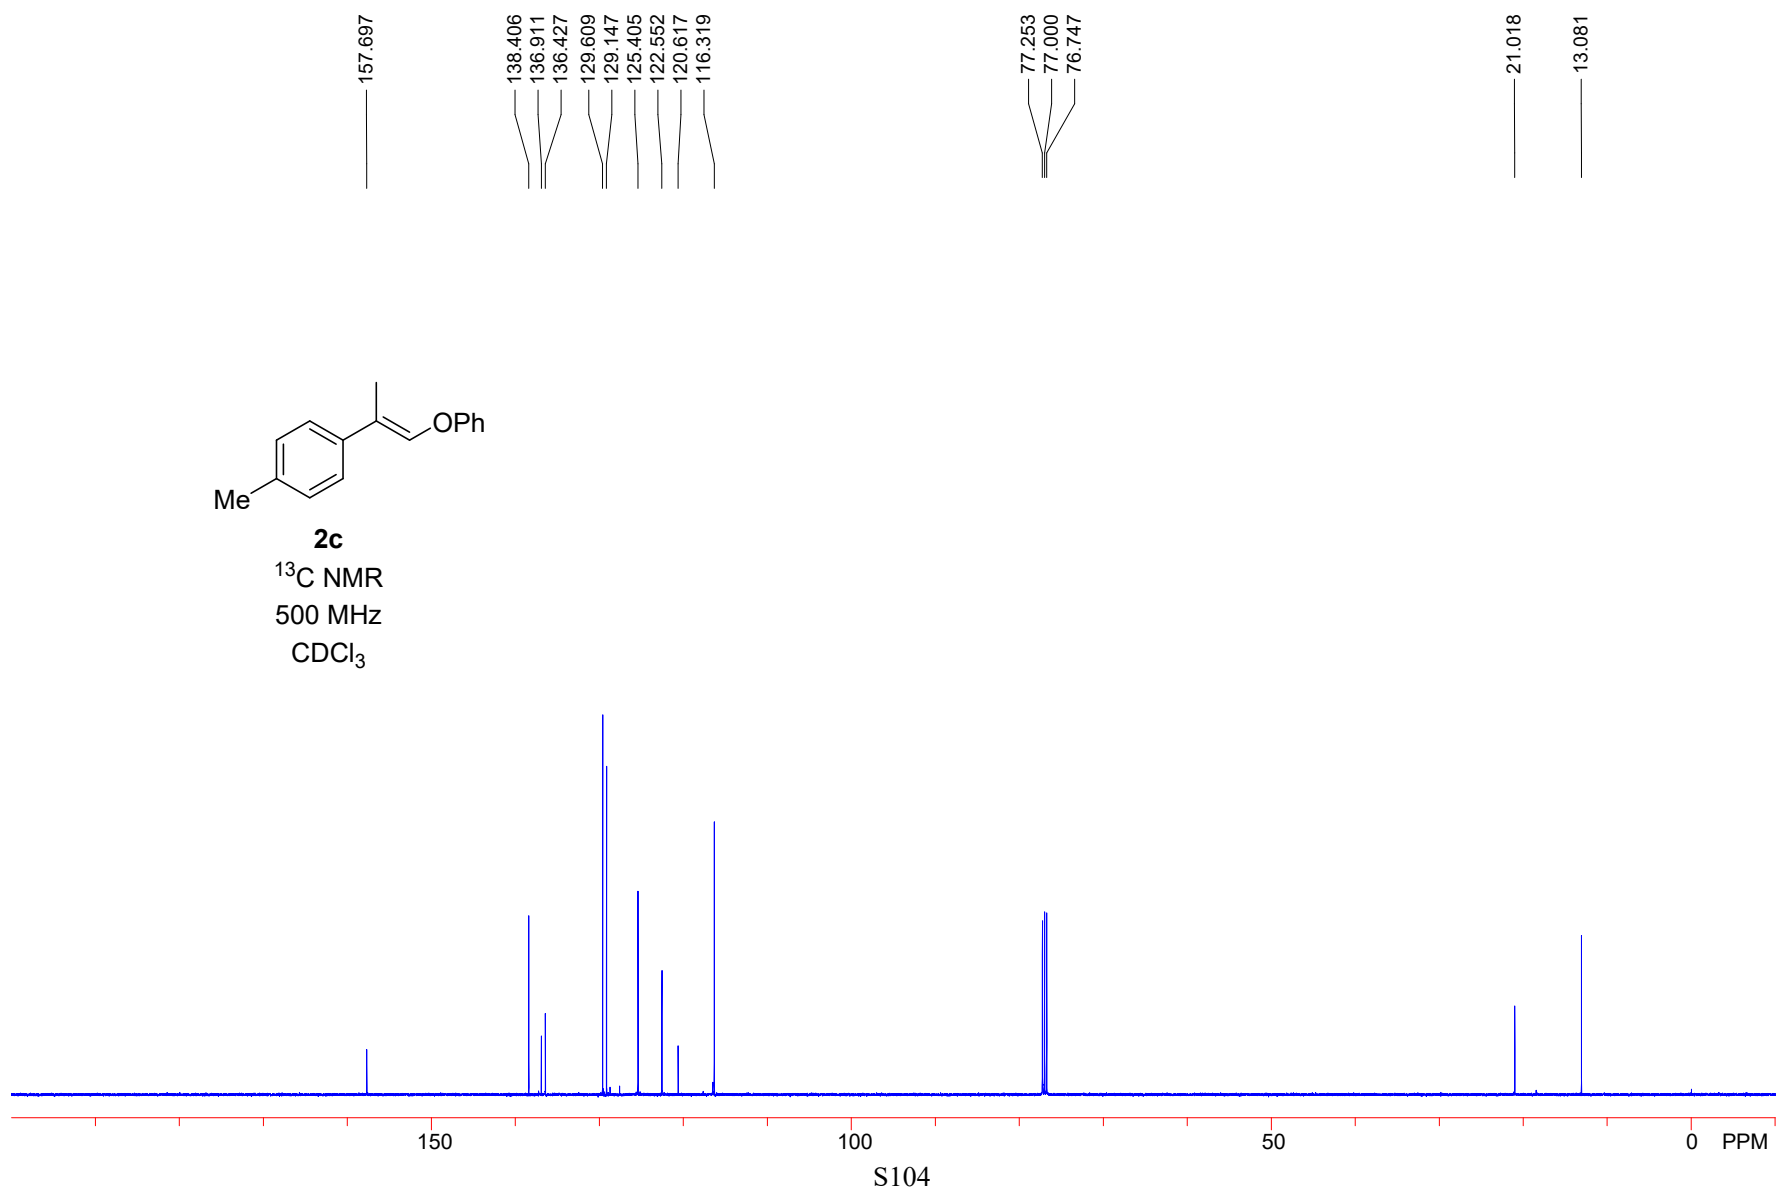



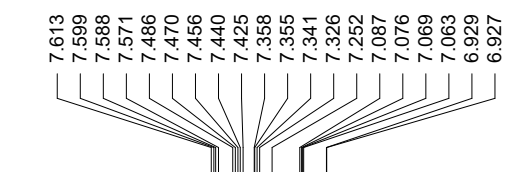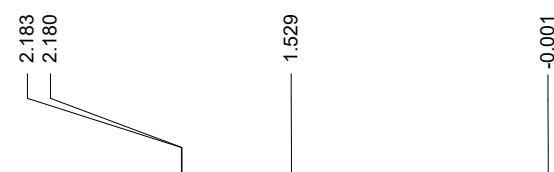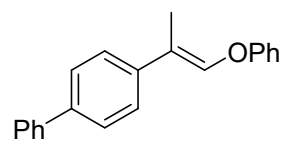

**2d**  
<sup>1</sup>H NMR  
 500 MHz  
 CDCl<sub>3</sub>

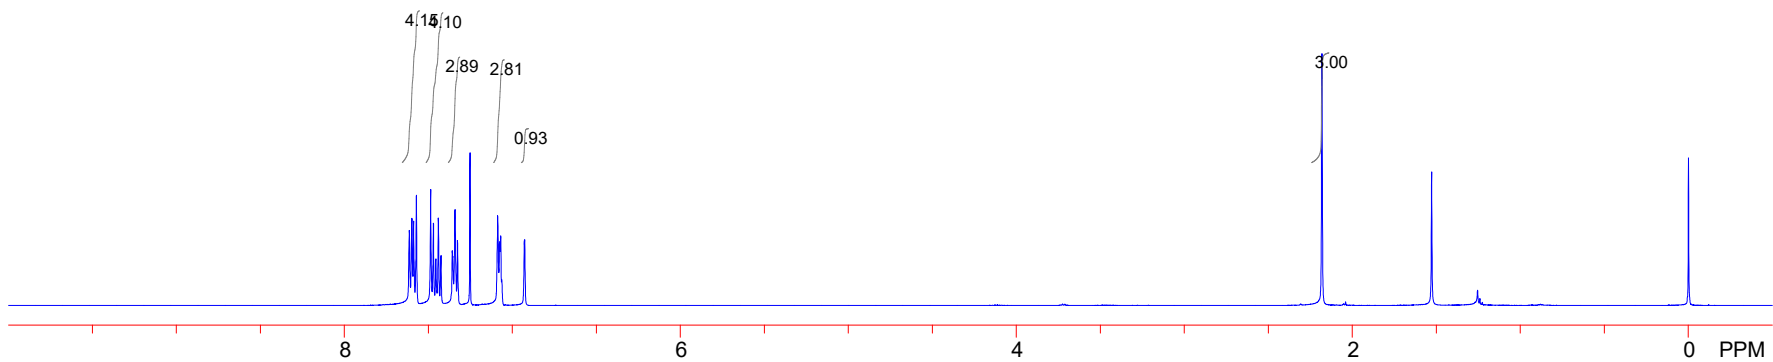

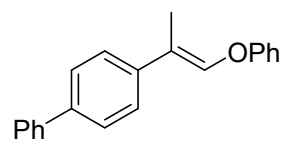

**2d**  
<sup>13</sup>C NMR  
500 MHz  
CDCl<sub>3</sub>

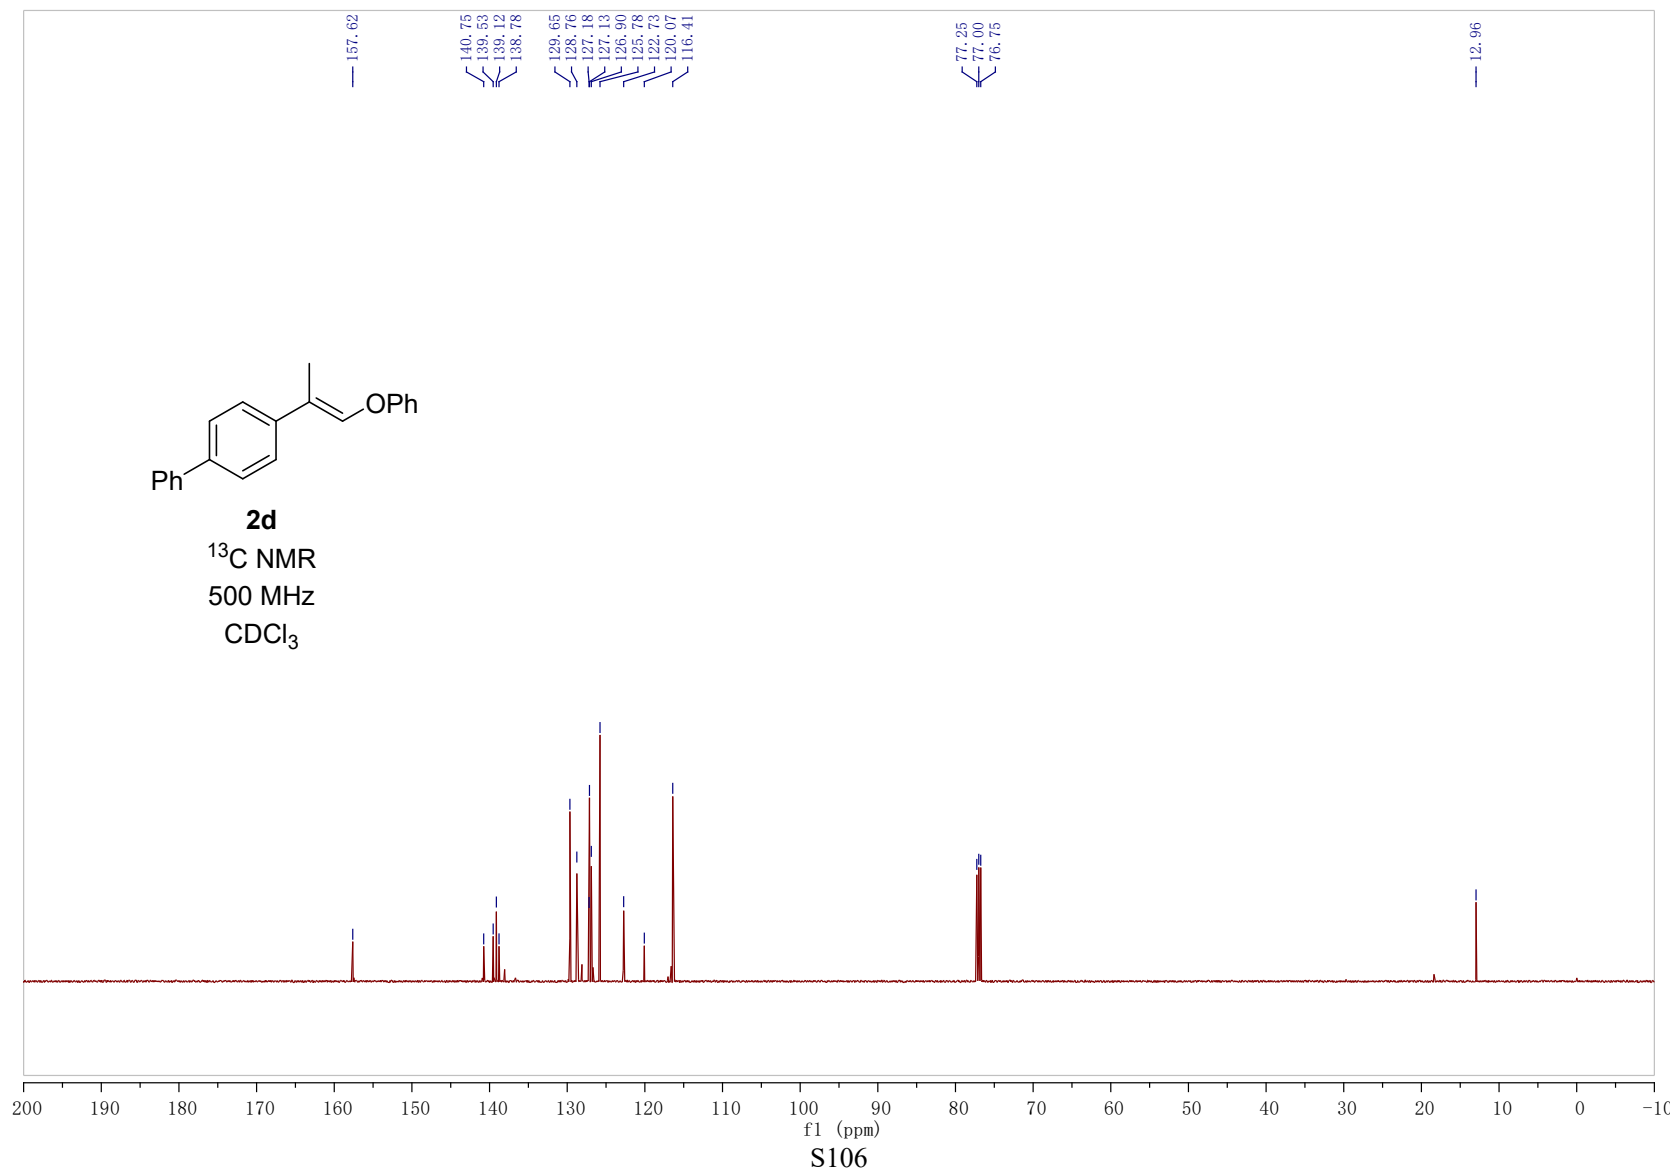

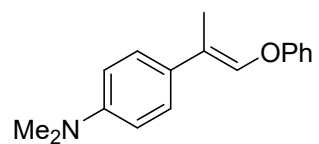

<sup>1</sup>H NMR  
400 MHz  
CDCl<sub>3</sub>

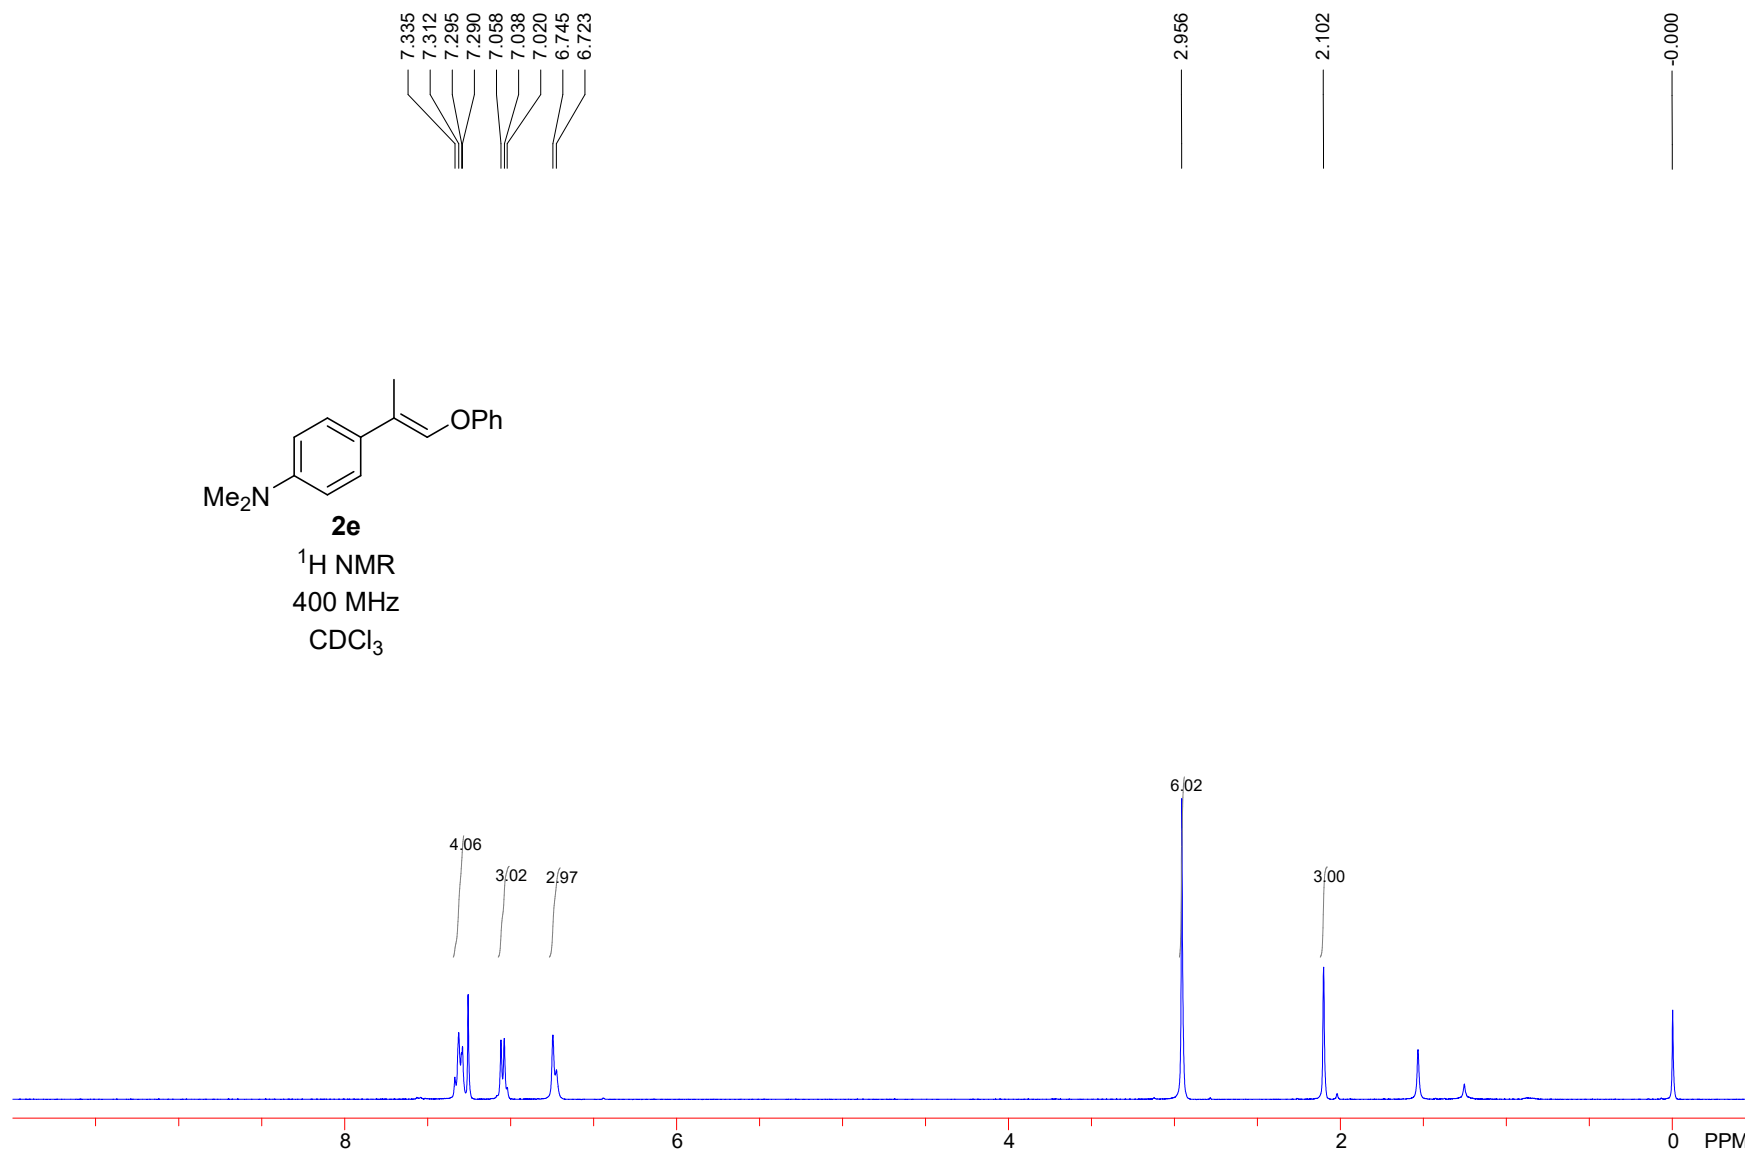

S107

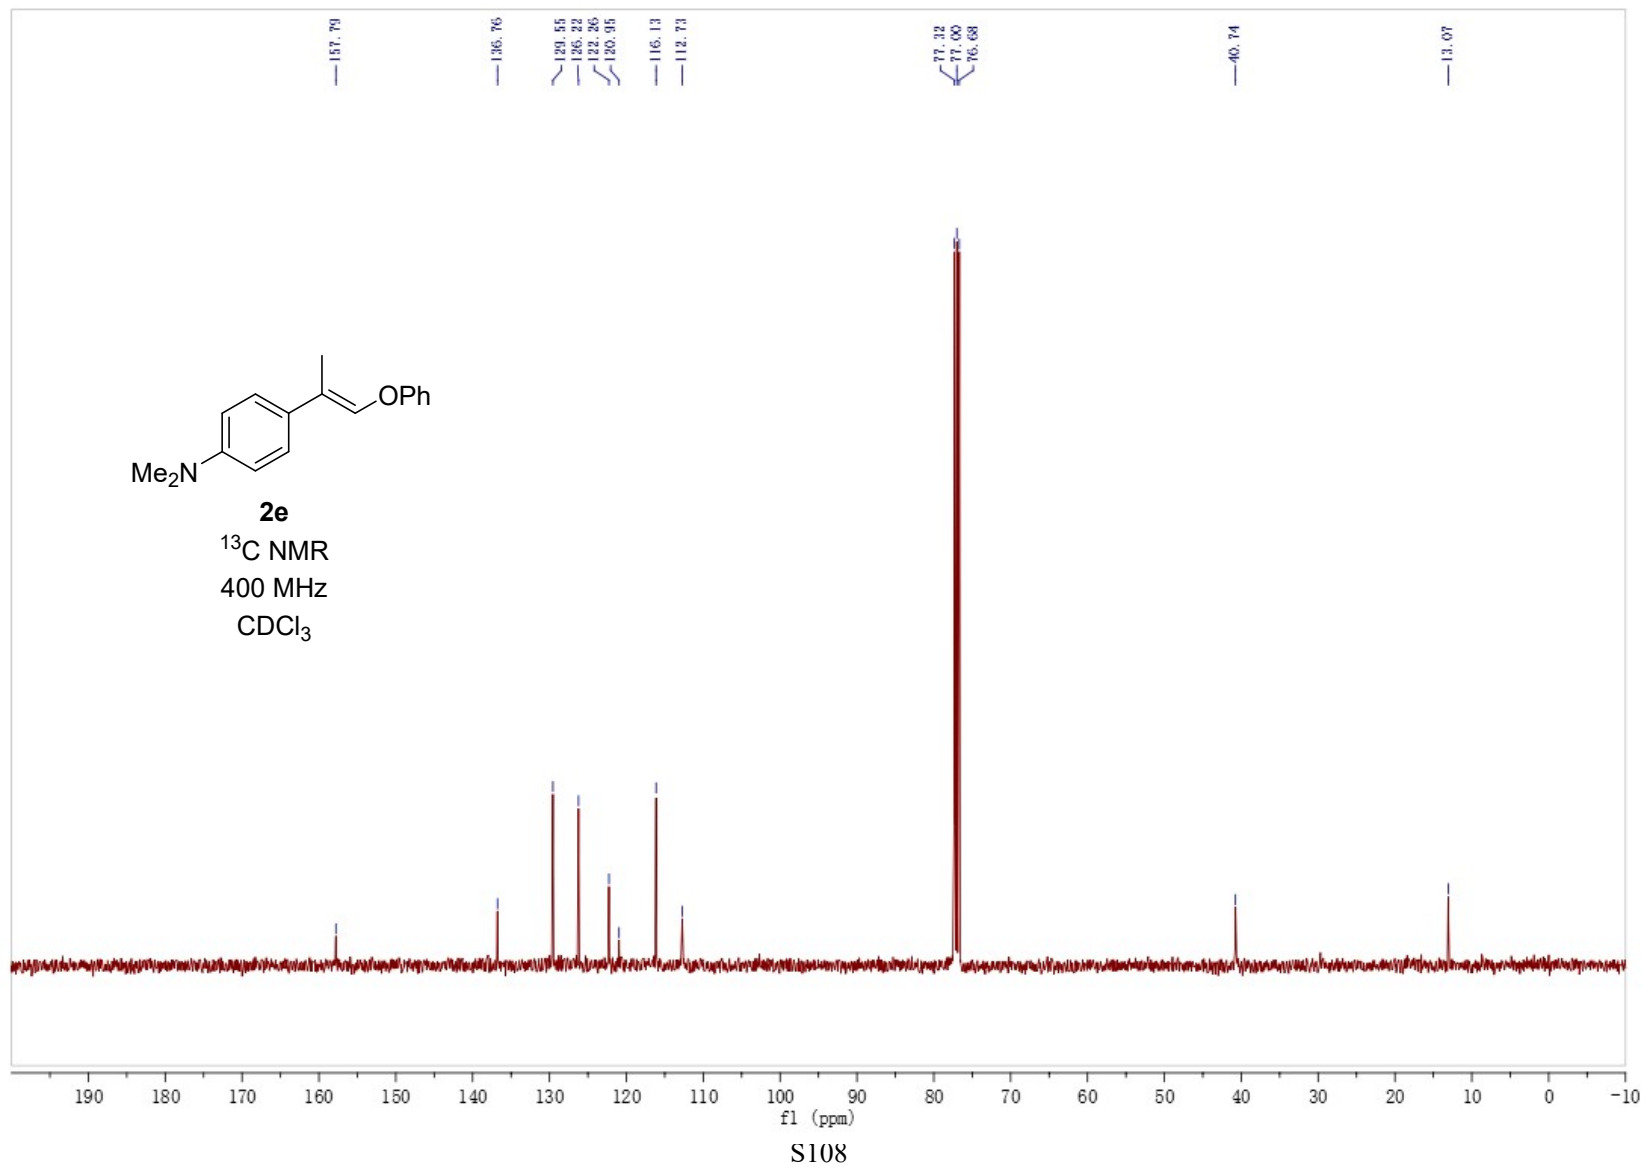

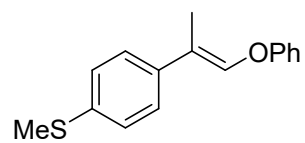

**2f**

<sup>1</sup>H NMR  
400 MHz  
CDCl<sub>3</sub>

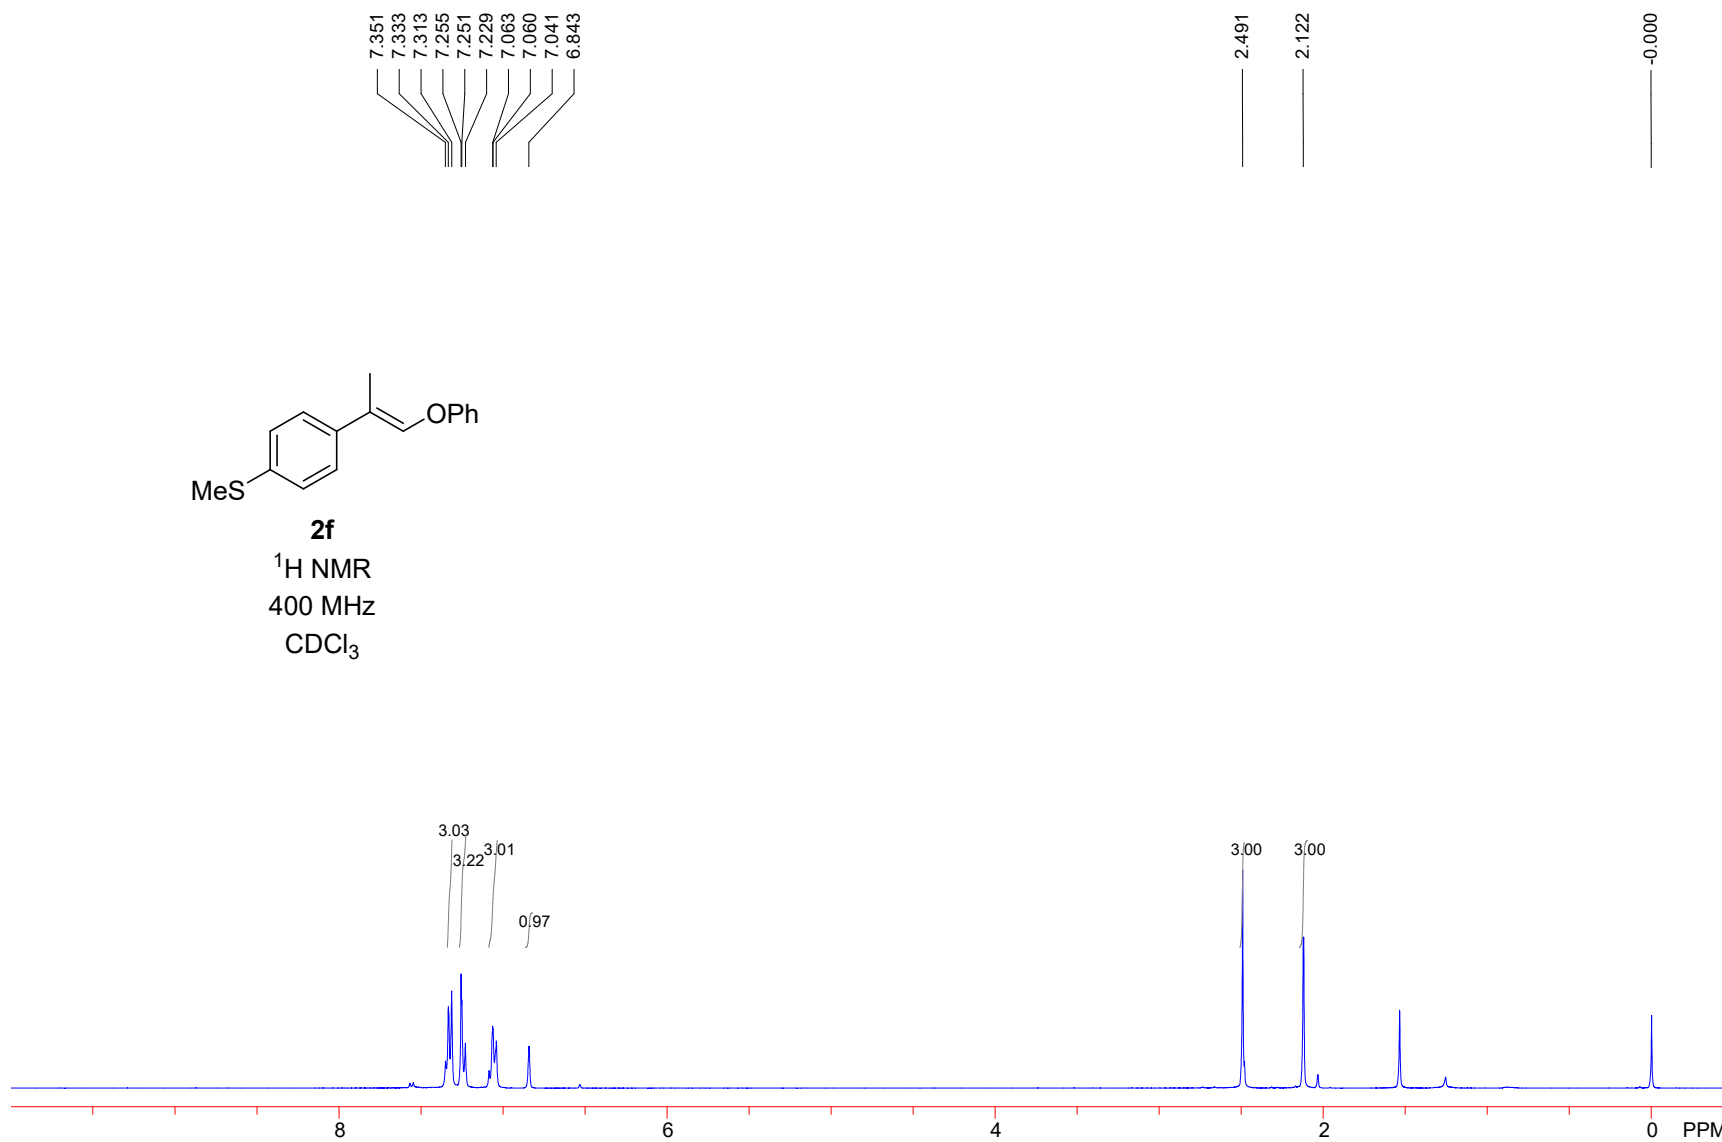

S109

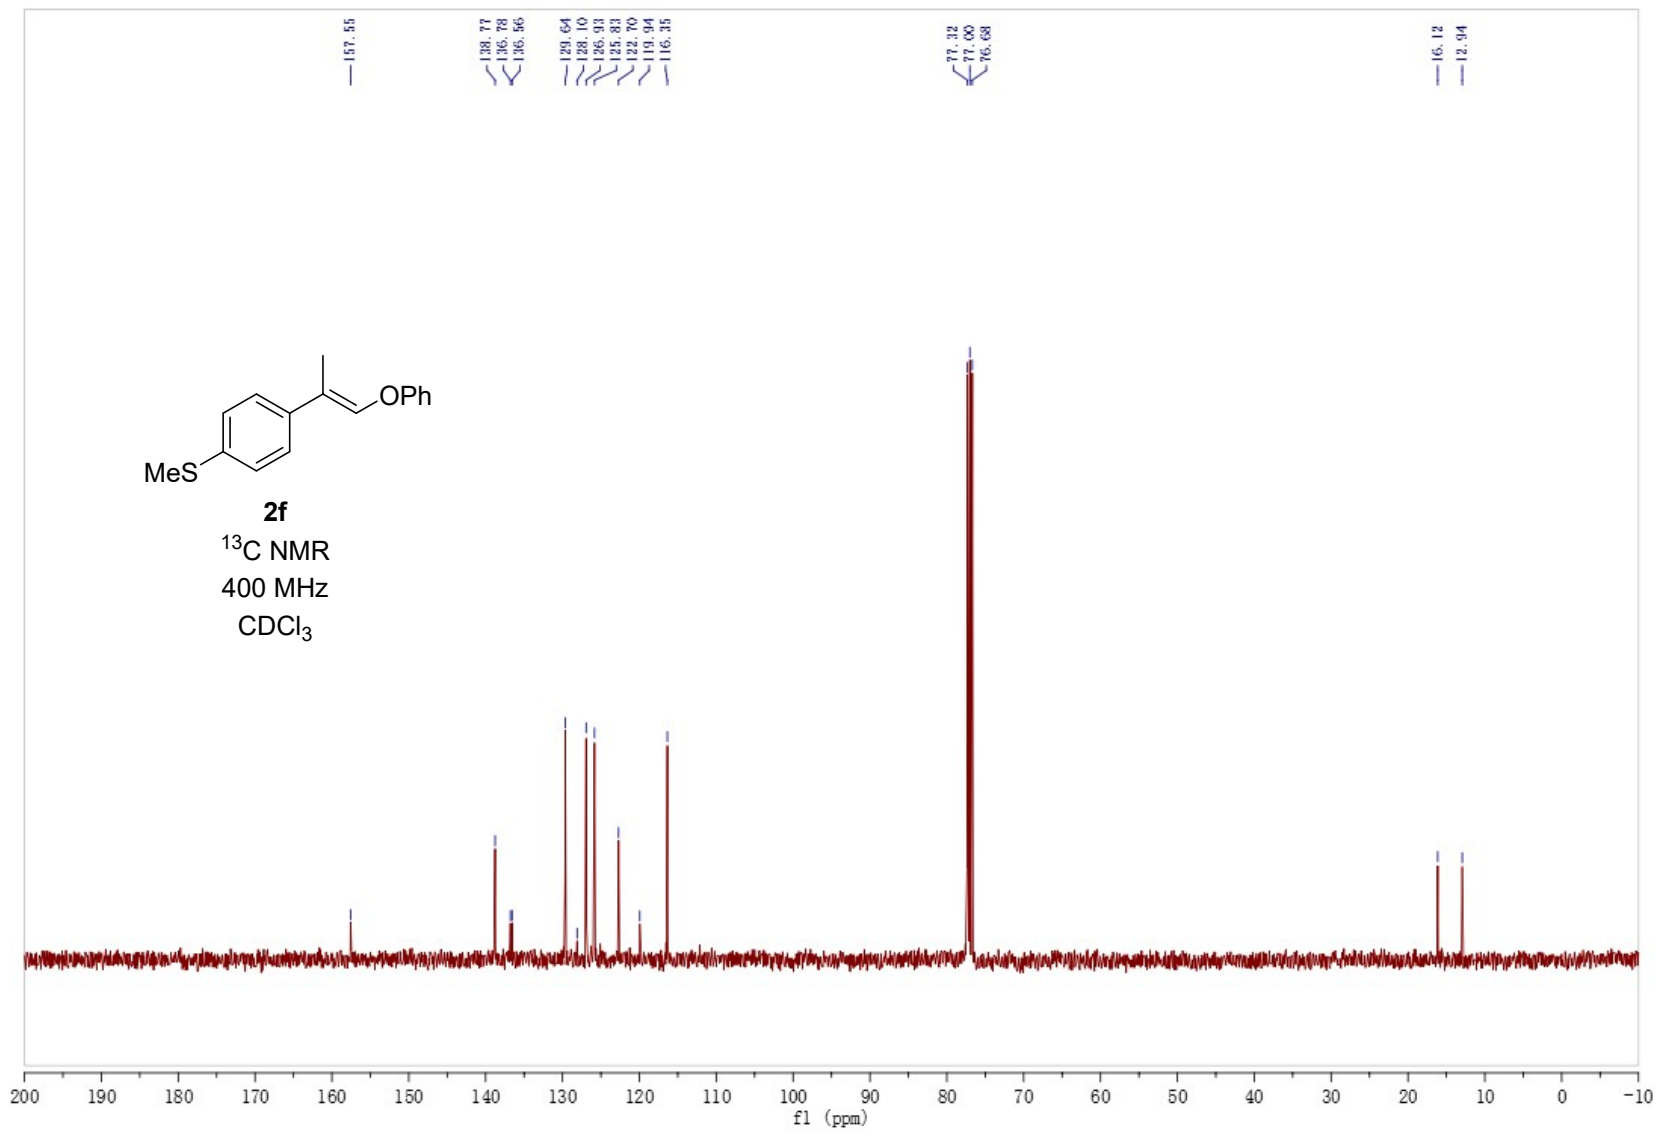

7.349  
7.345  
7.339  
7.331  
7.324  
7.322  
7.307  
7.077  
7.062  
7.051  
7.034  
7.016  
6.999  
6.775  
6.773

2.117  
2.115

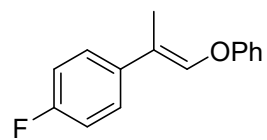

**2g**

<sup>1</sup>H NMR  
500 MHz  
CDCl<sub>3</sub>

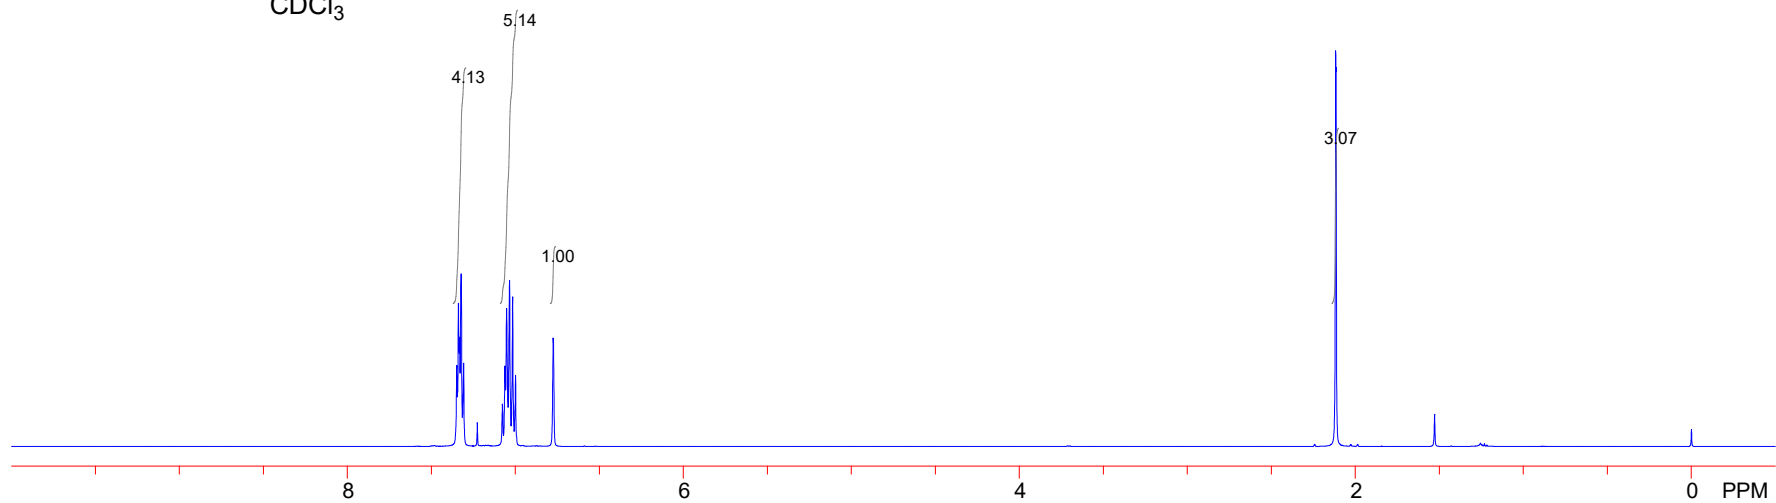

S111

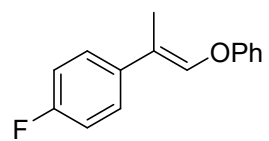

**2g**  
<sup>13</sup>C NMR  
500 MHz  
CDCl<sub>3</sub>

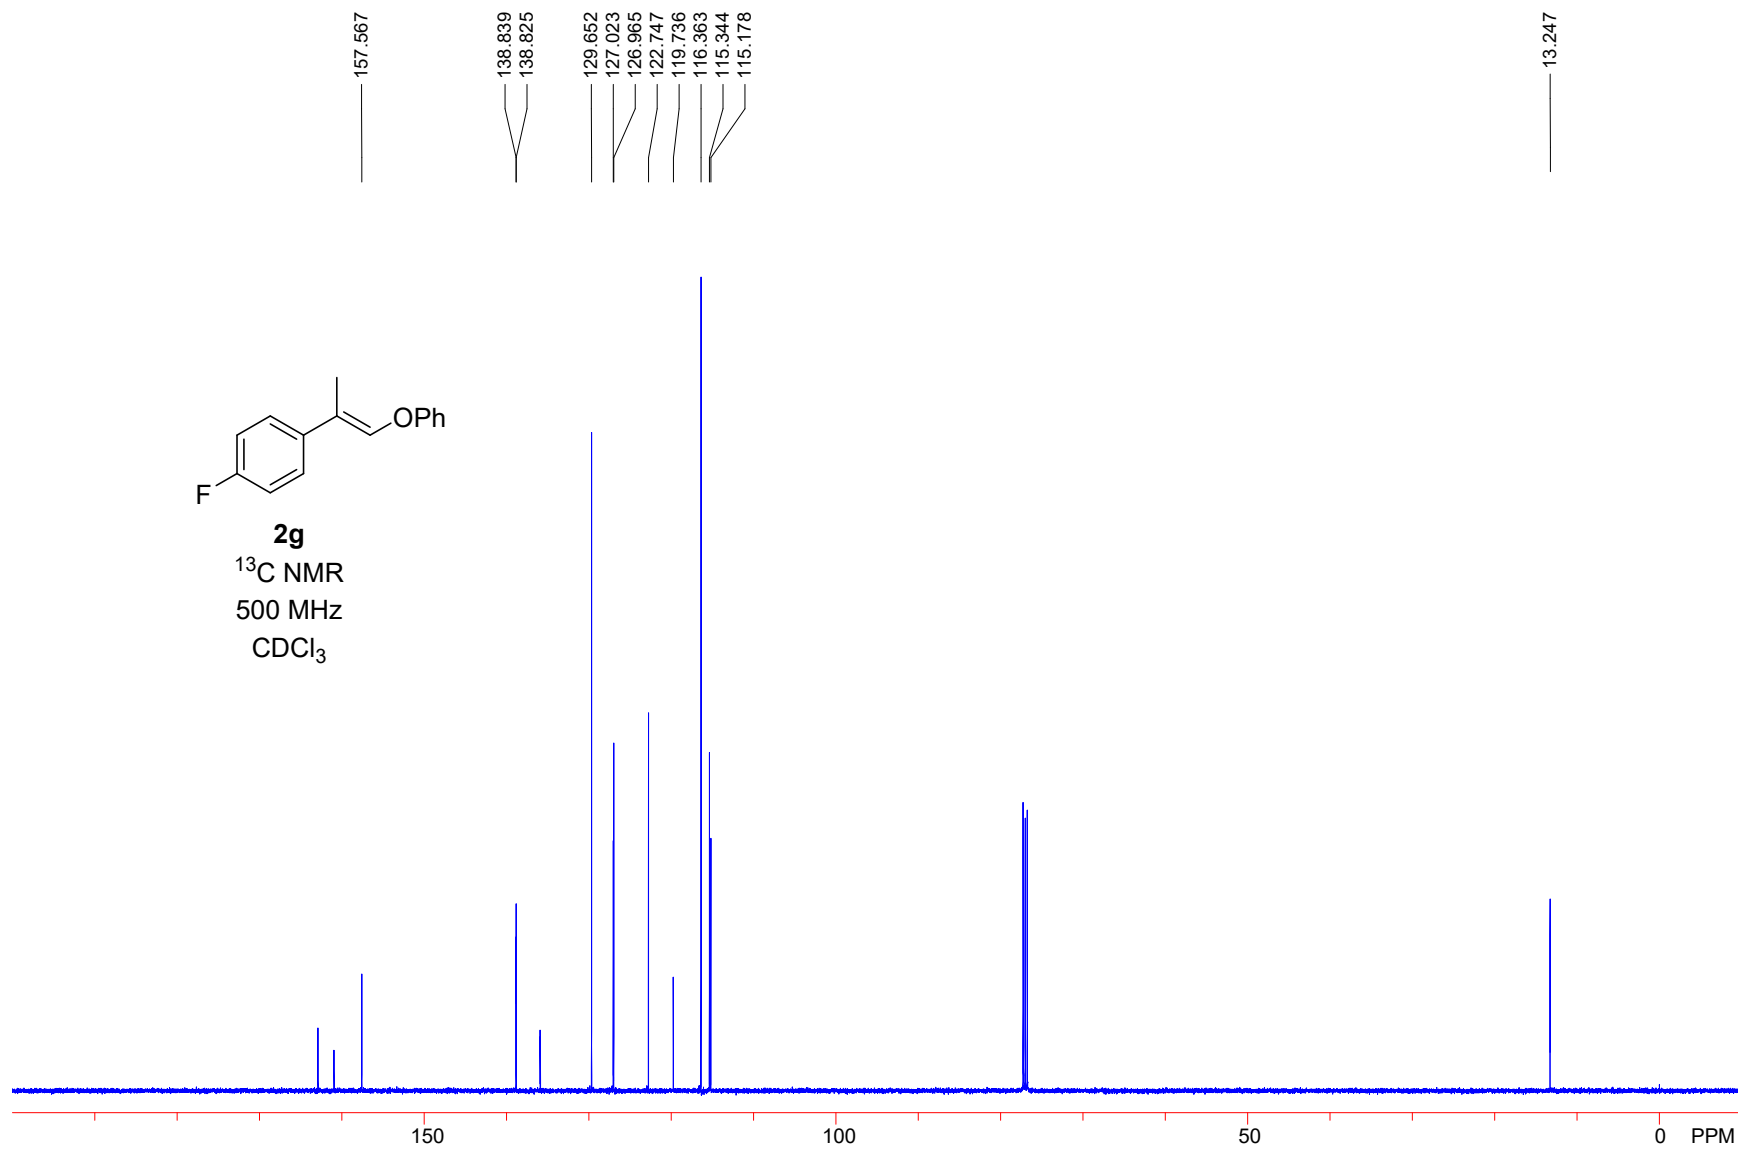

S112



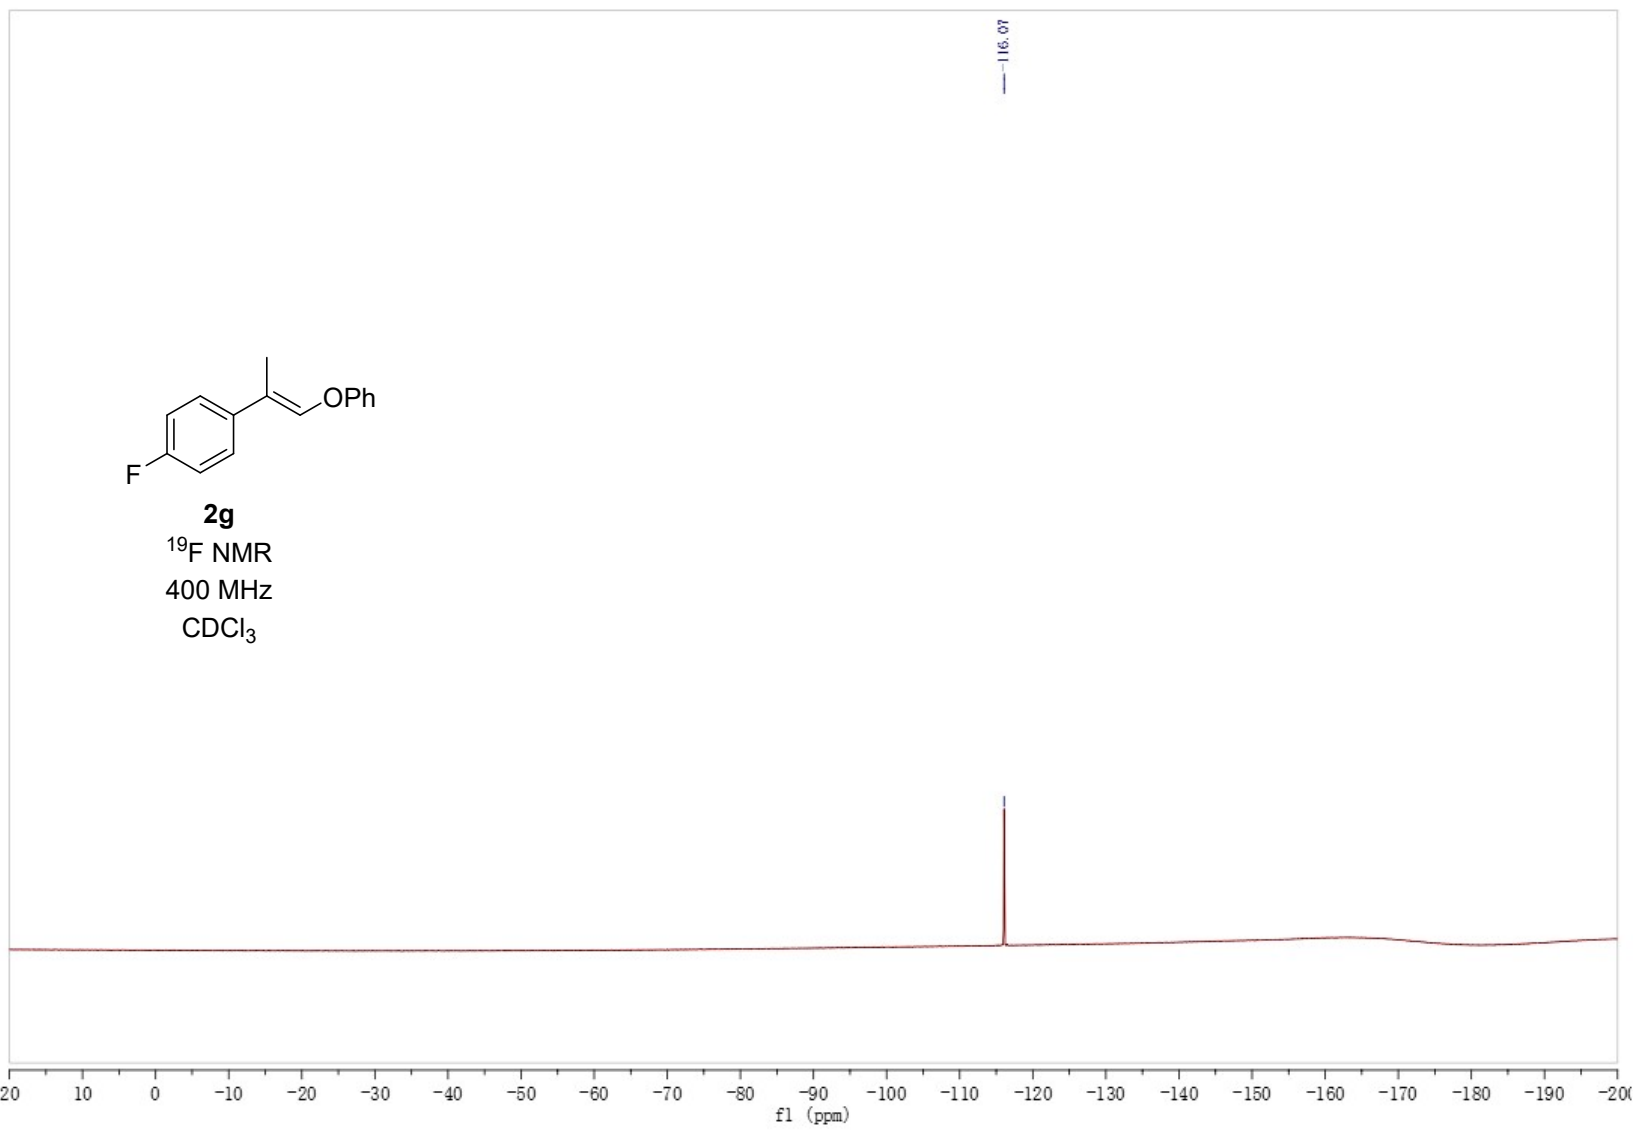

S113

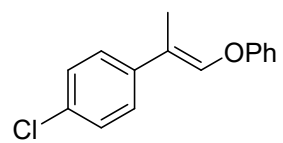

**2h**

<sup>1</sup>H NMR  
500 MHz  
CDCl<sub>3</sub>

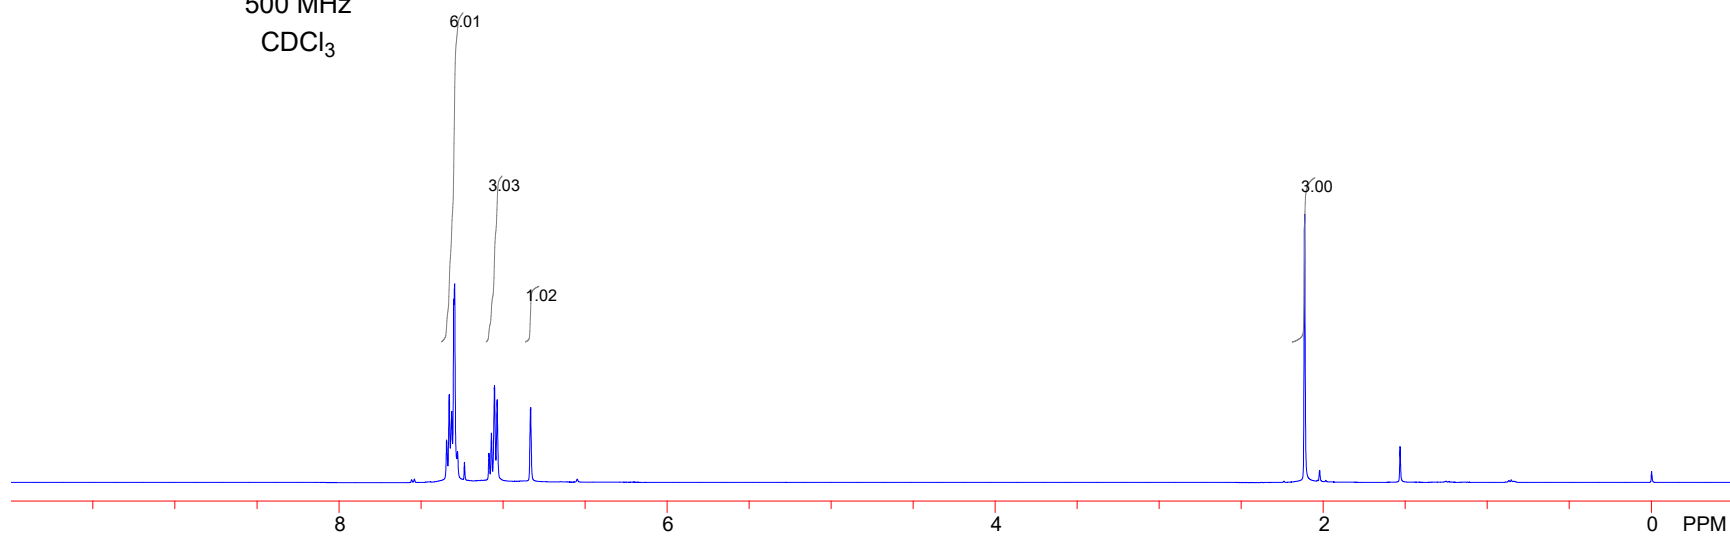

7.344  
7.343  
7.327  
7.312  
7.300  
7.295  
7.278  
7.277  
7.086  
7.071  
7.053  
7.051  
7.036  
6.833  
6.831

2.113



**2h**

<sup>13</sup>C NMR  
500 MHz  
CDCl<sub>3</sub>

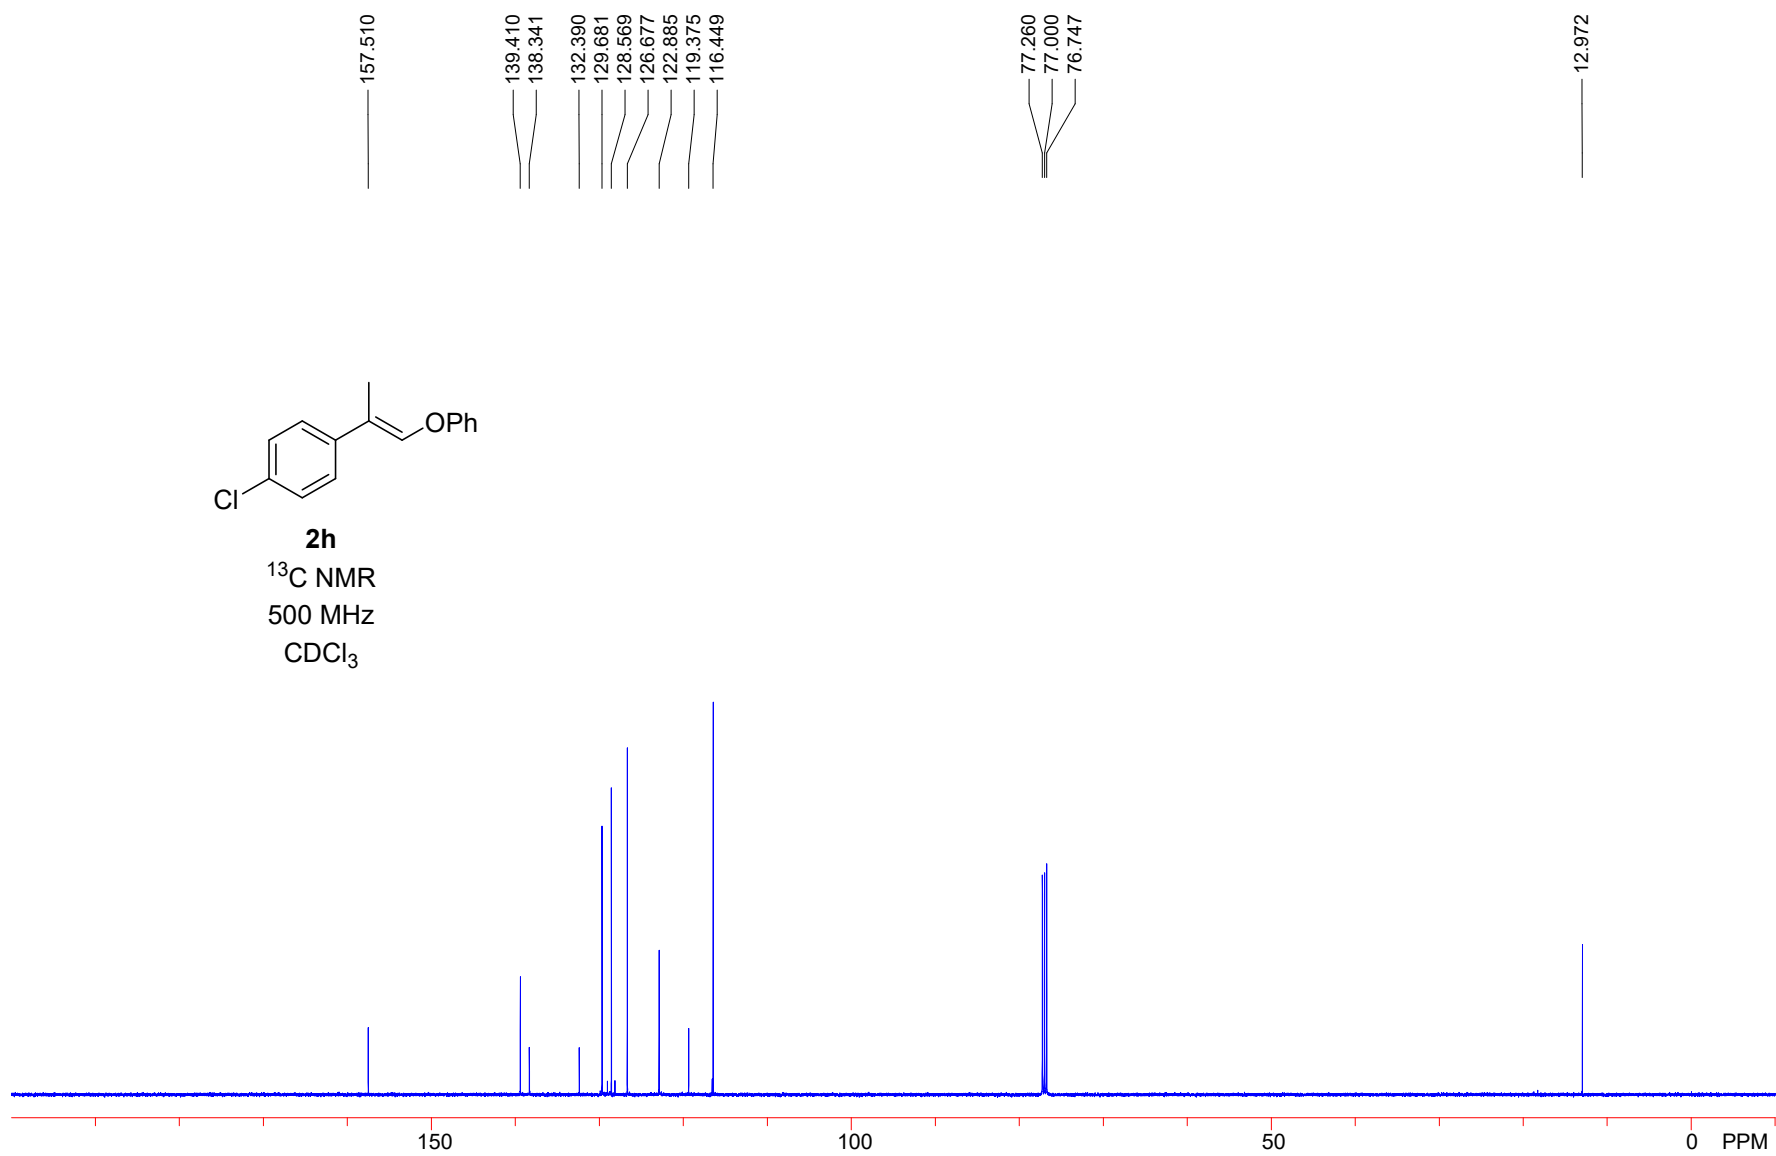

S115

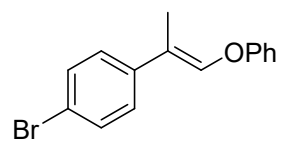

**2i**

<sup>1</sup>H NMR  
500 MHz  
CDCl<sub>3</sub>

7.451  
7.433  
7.347  
7.332  
7.317  
7.316  
7.258  
7.241  
7.075  
7.054  
7.052  
7.038  
7.036  
6.845  
6.843

2.115  
2.113

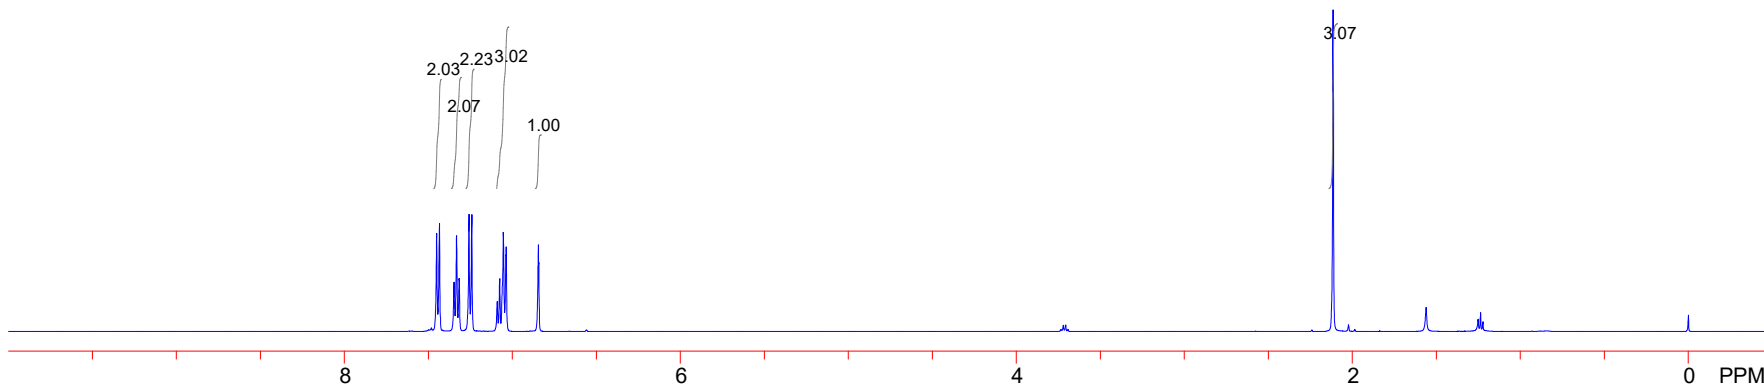

S116



**2i**

$^{13}\text{C}$  NMR  
500 MHz  
 $\text{CDCl}_3$

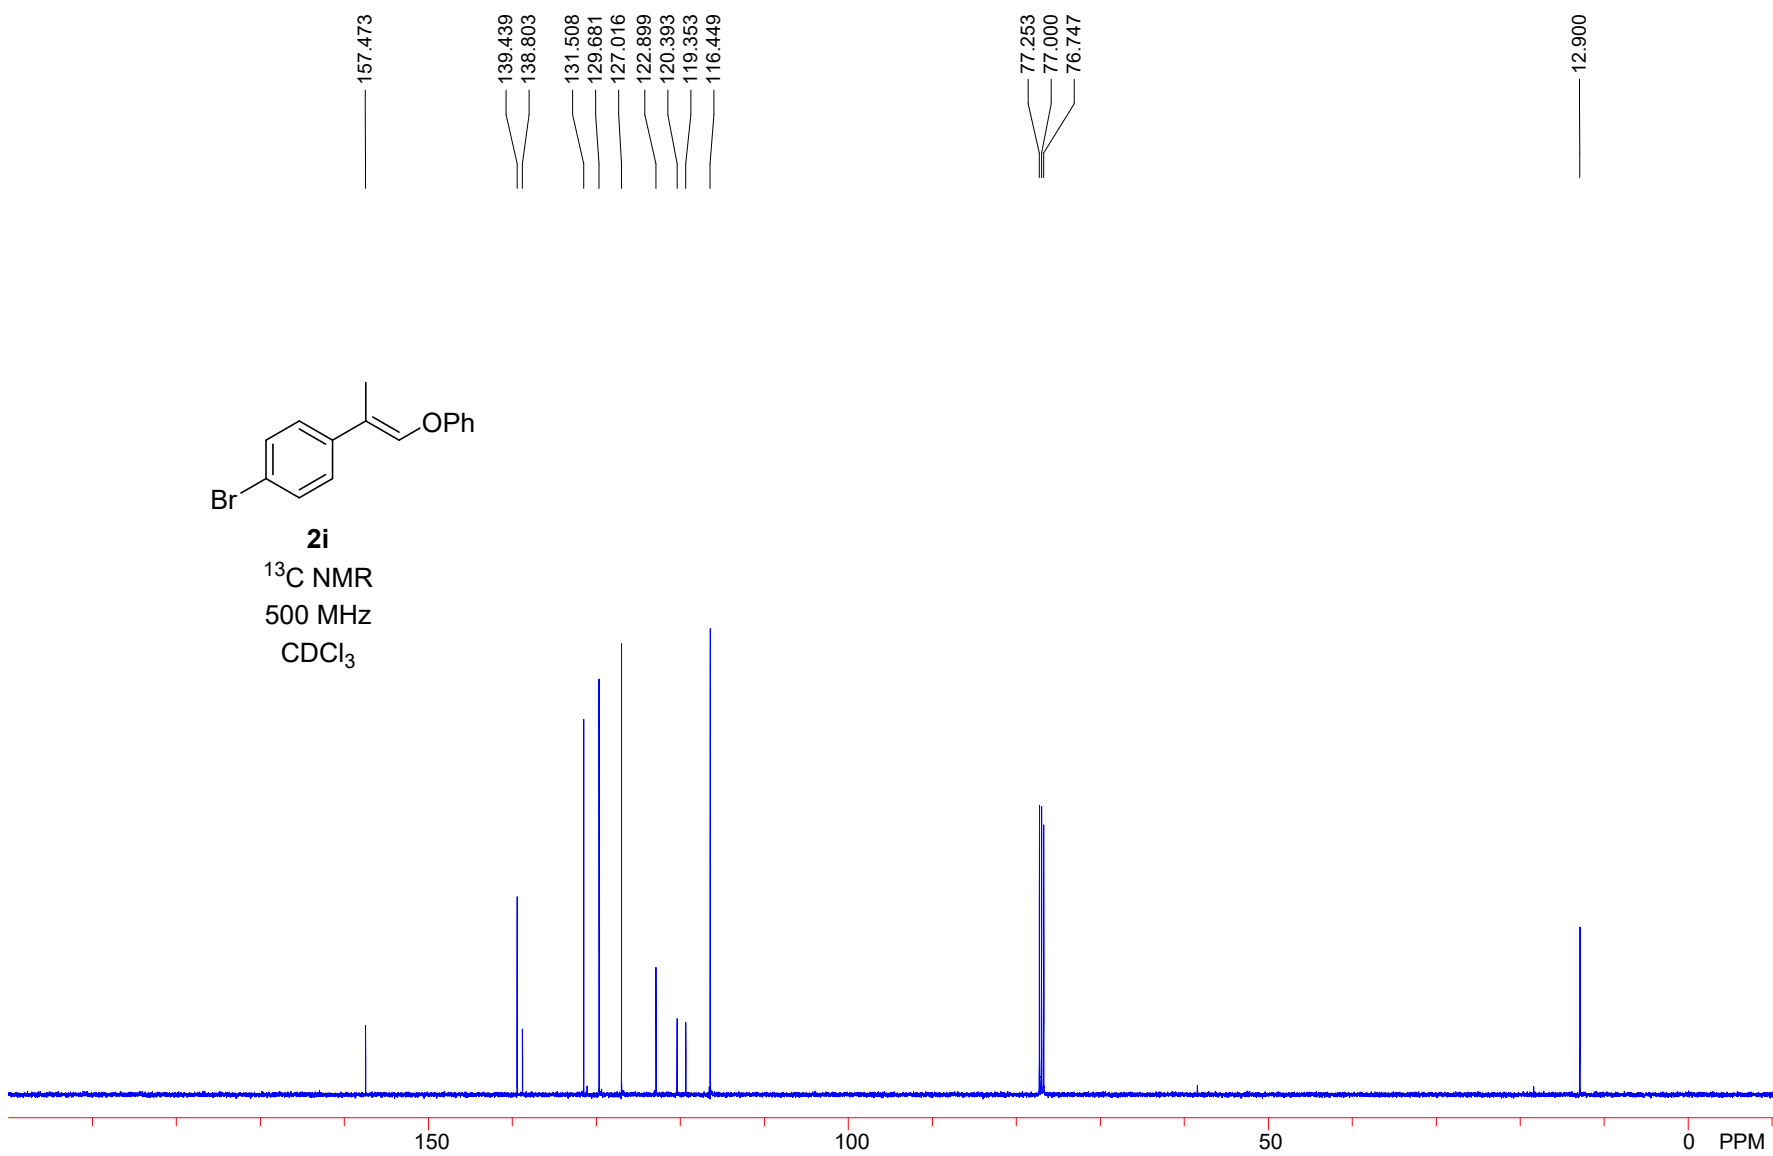

S117

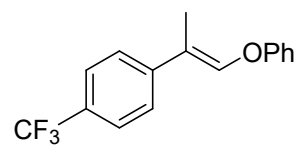

**2j**  
<sup>1</sup>H NMR  
500 MHz  
CDCl<sub>3</sub>

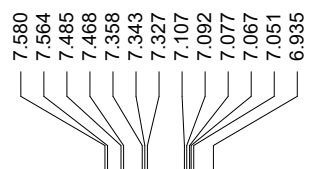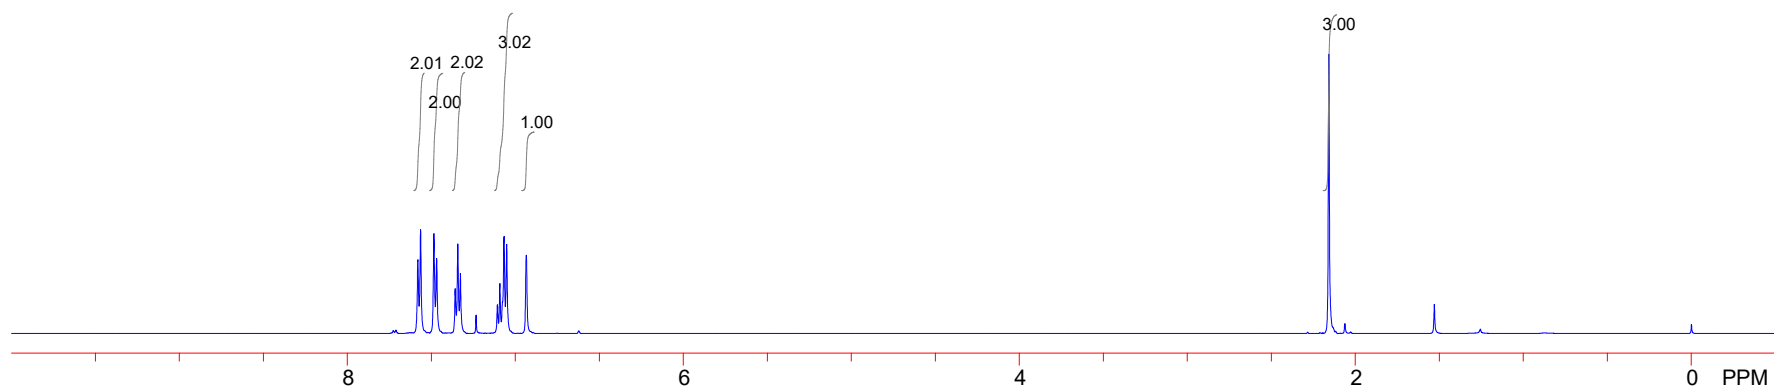

S118

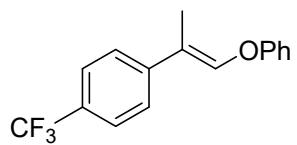

**2j**

<sup>13</sup>C NMR  
500 MHz  
CDCl<sub>3</sub>

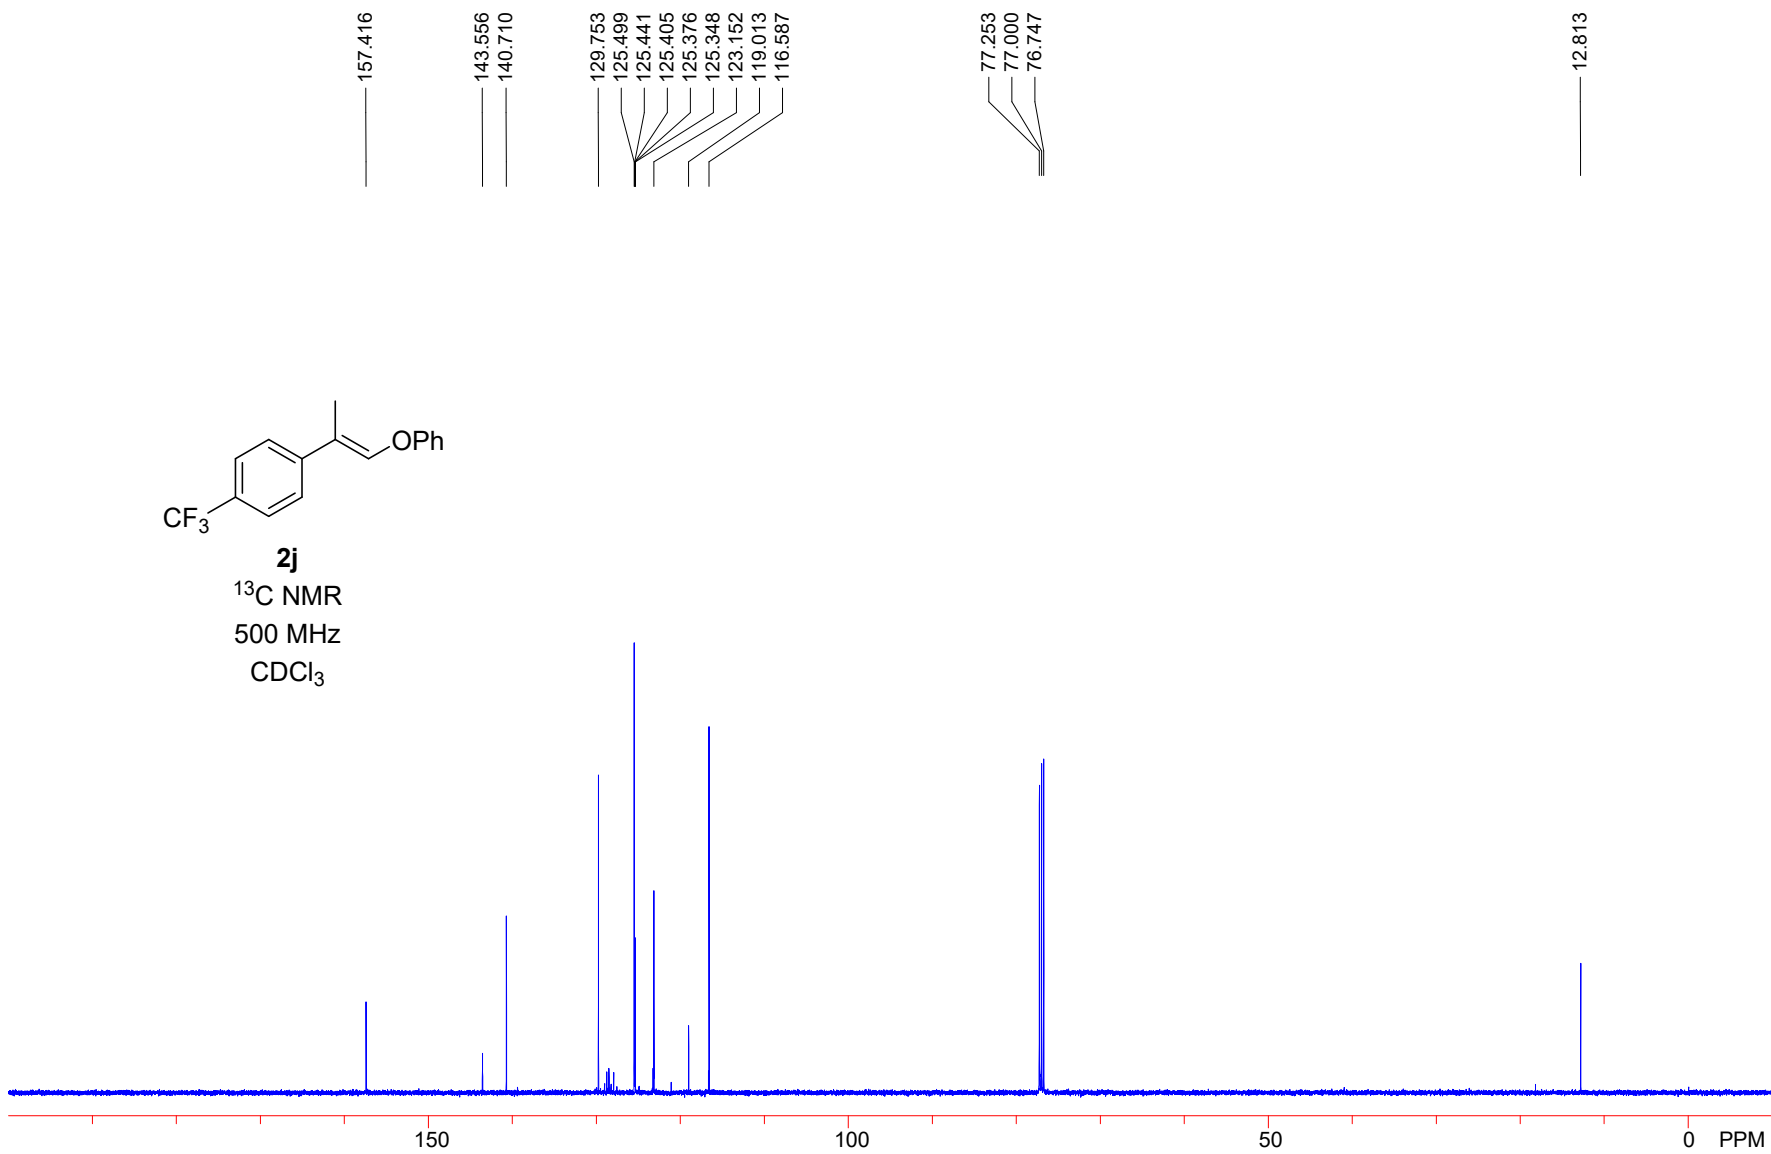

S119

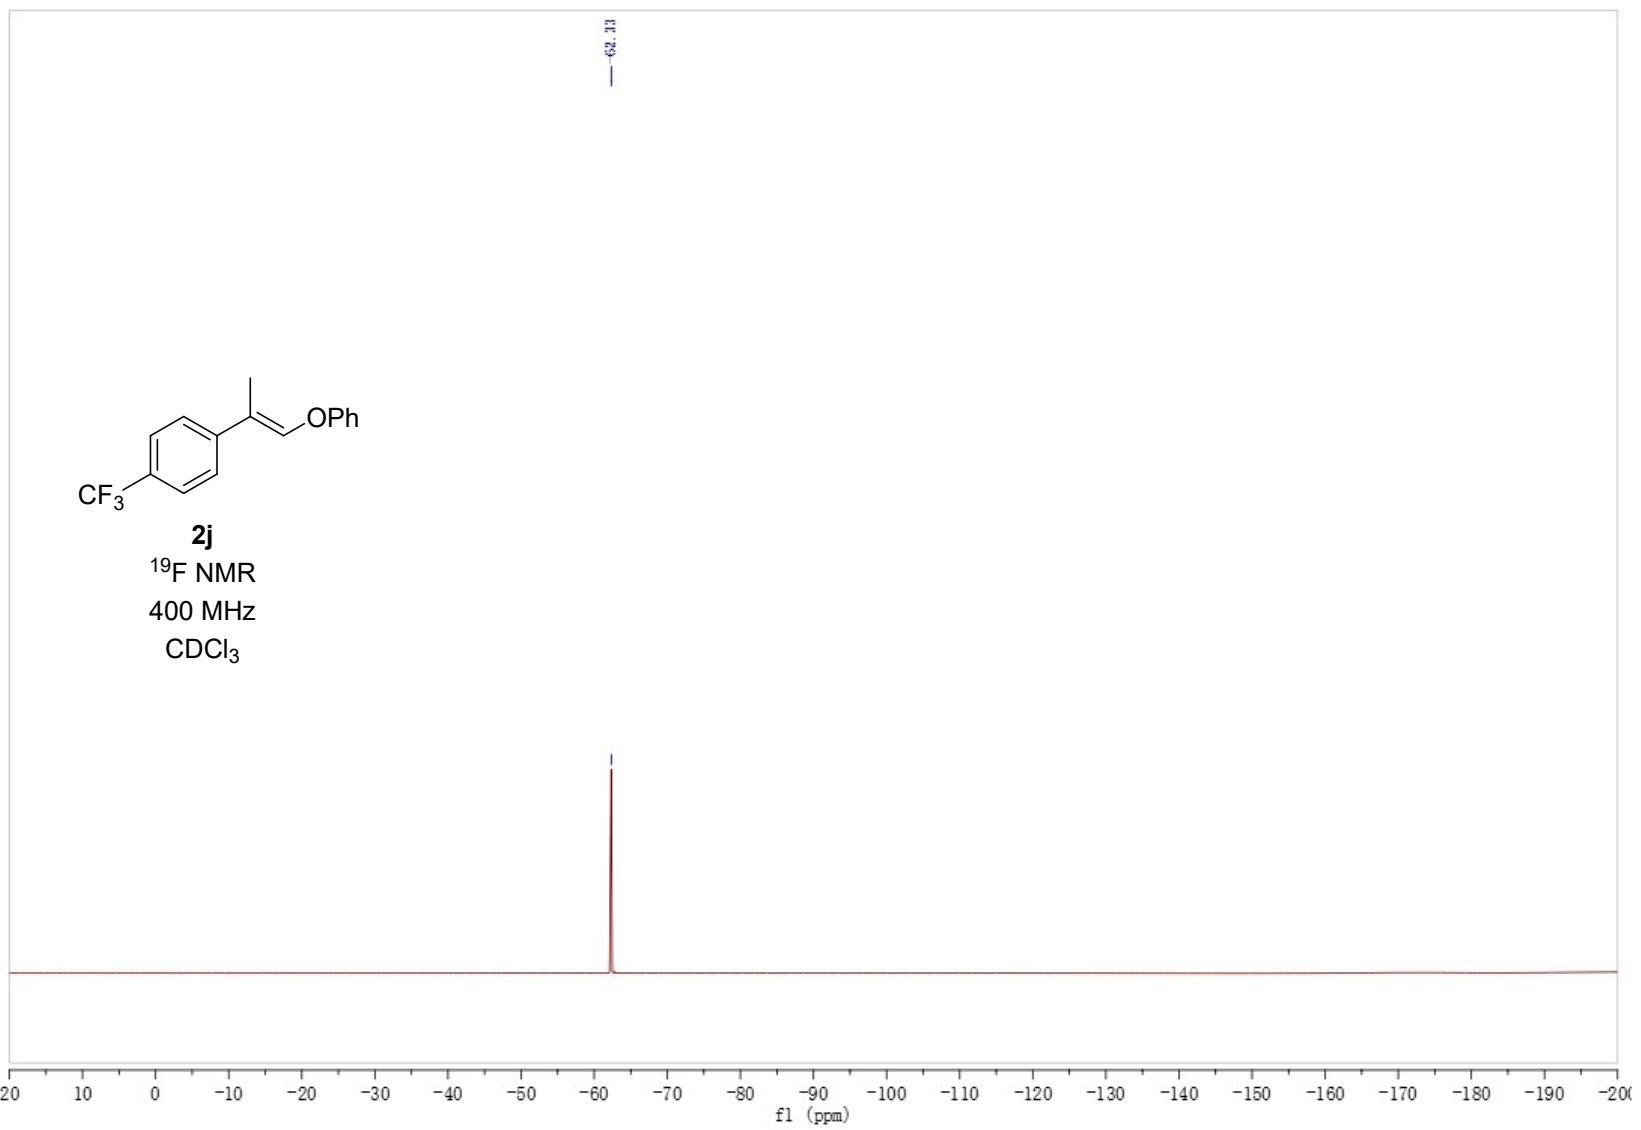

S120



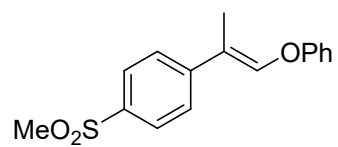

**2k**

<sup>1</sup>H NMR  
400 MHz  
CDCl<sub>3</sub>

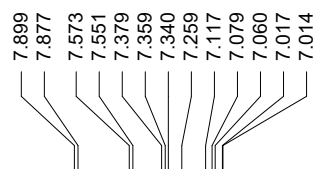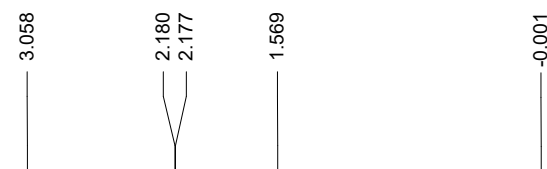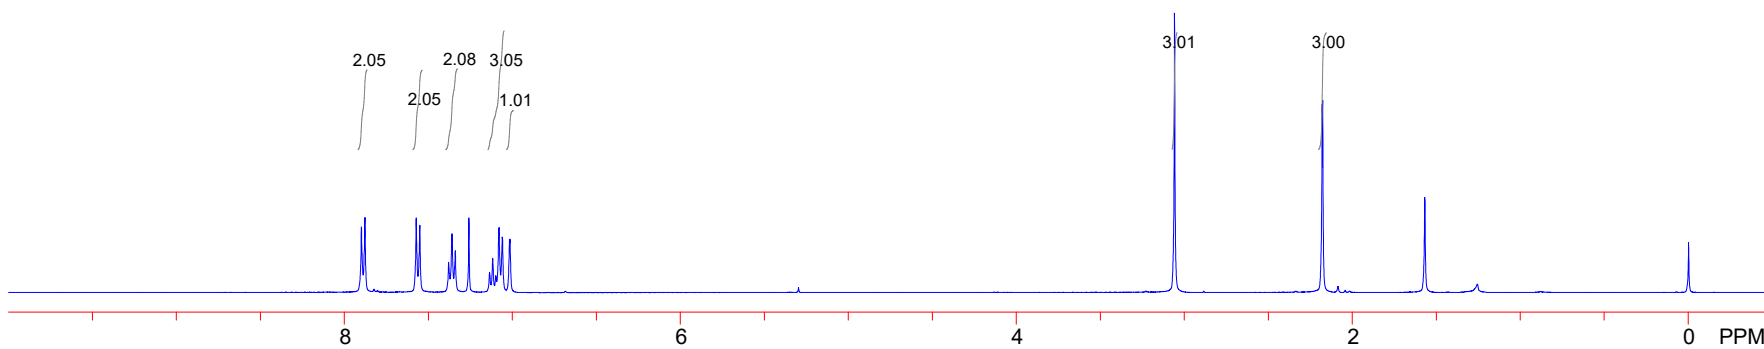

S121

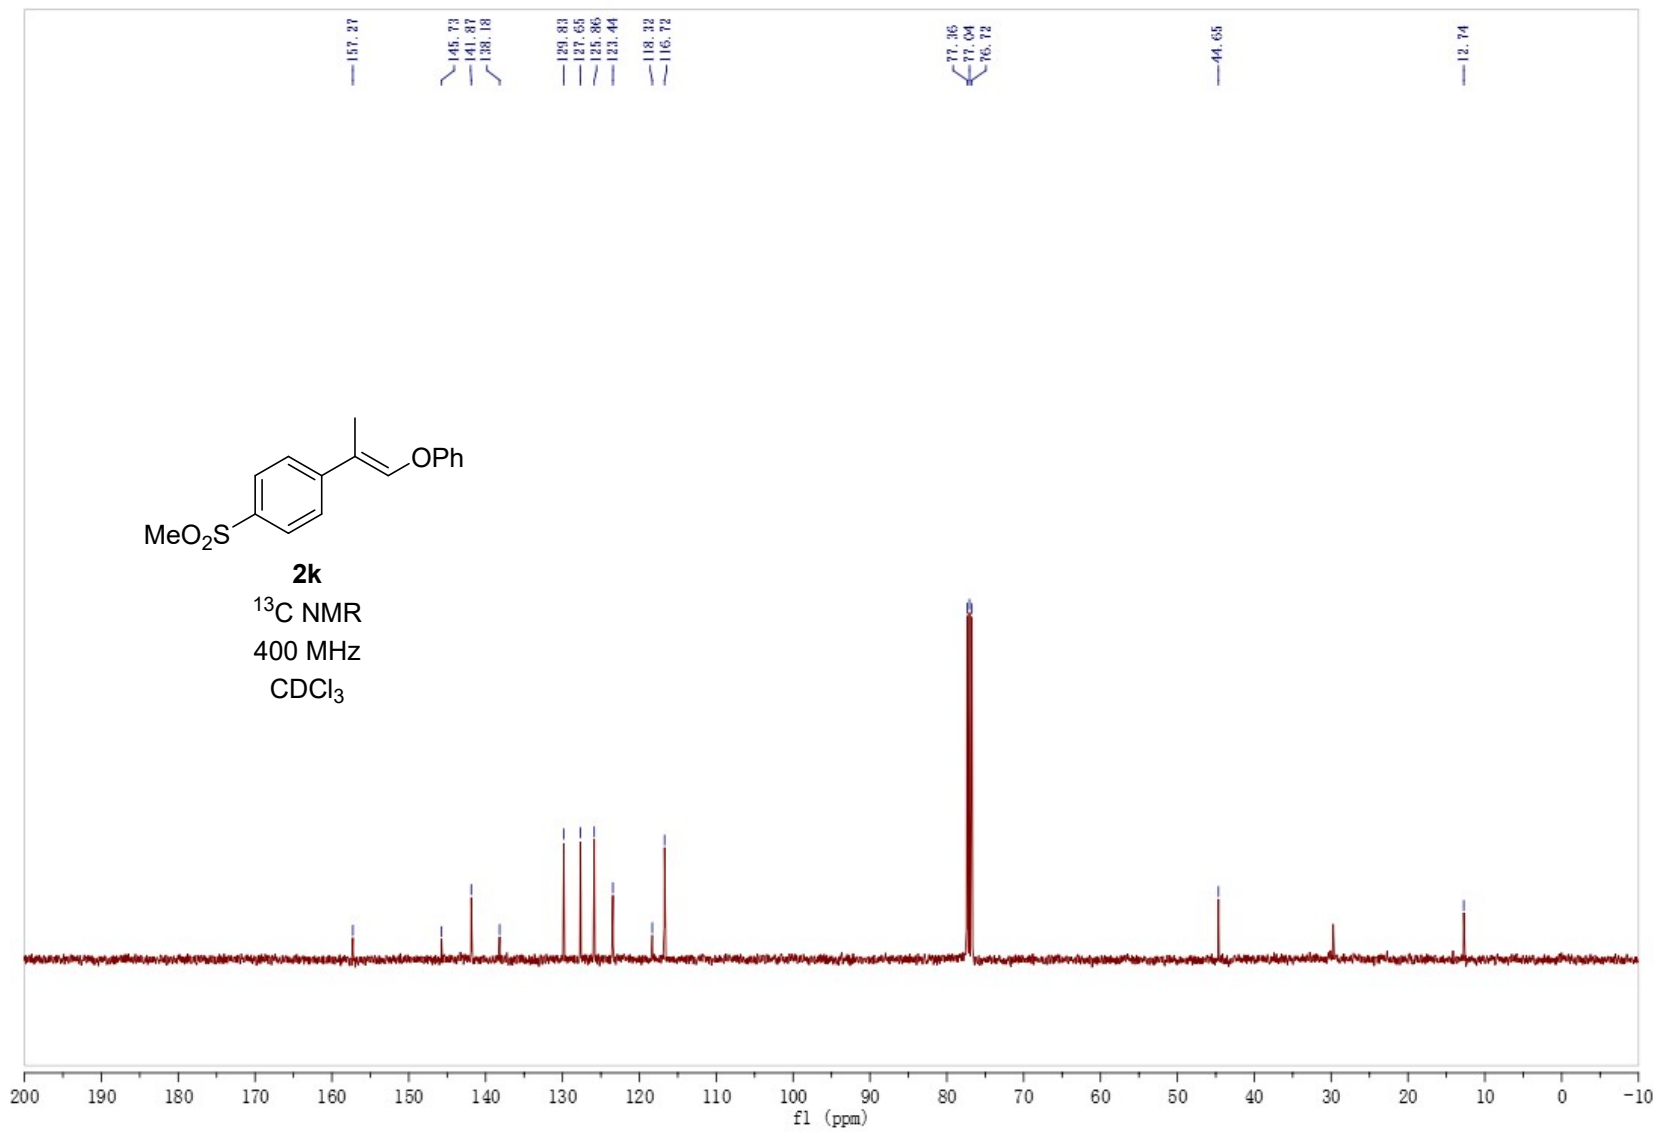

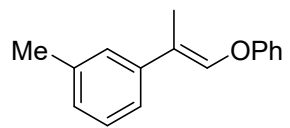

**21**

<sup>1</sup>H NMR  
400 MHz  
CDCl<sub>3</sub>

7.342  
7.323  
7.304  
7.237  
7.227  
7.206  
7.064  
7.062  
7.059  
7.044  
6.832

2.364  
2.133  
1.524

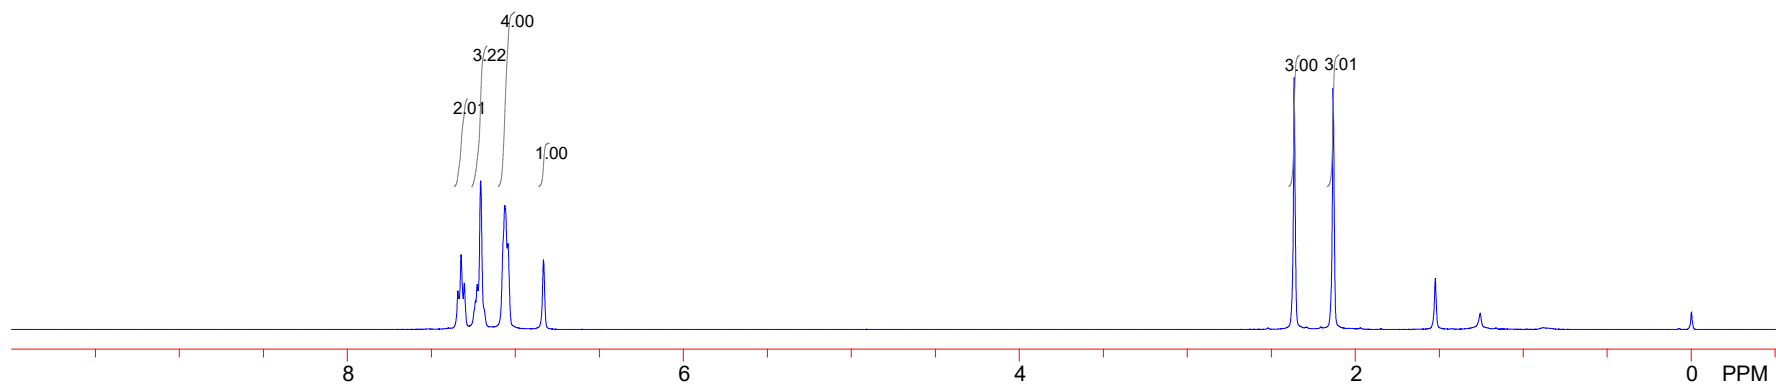

S123

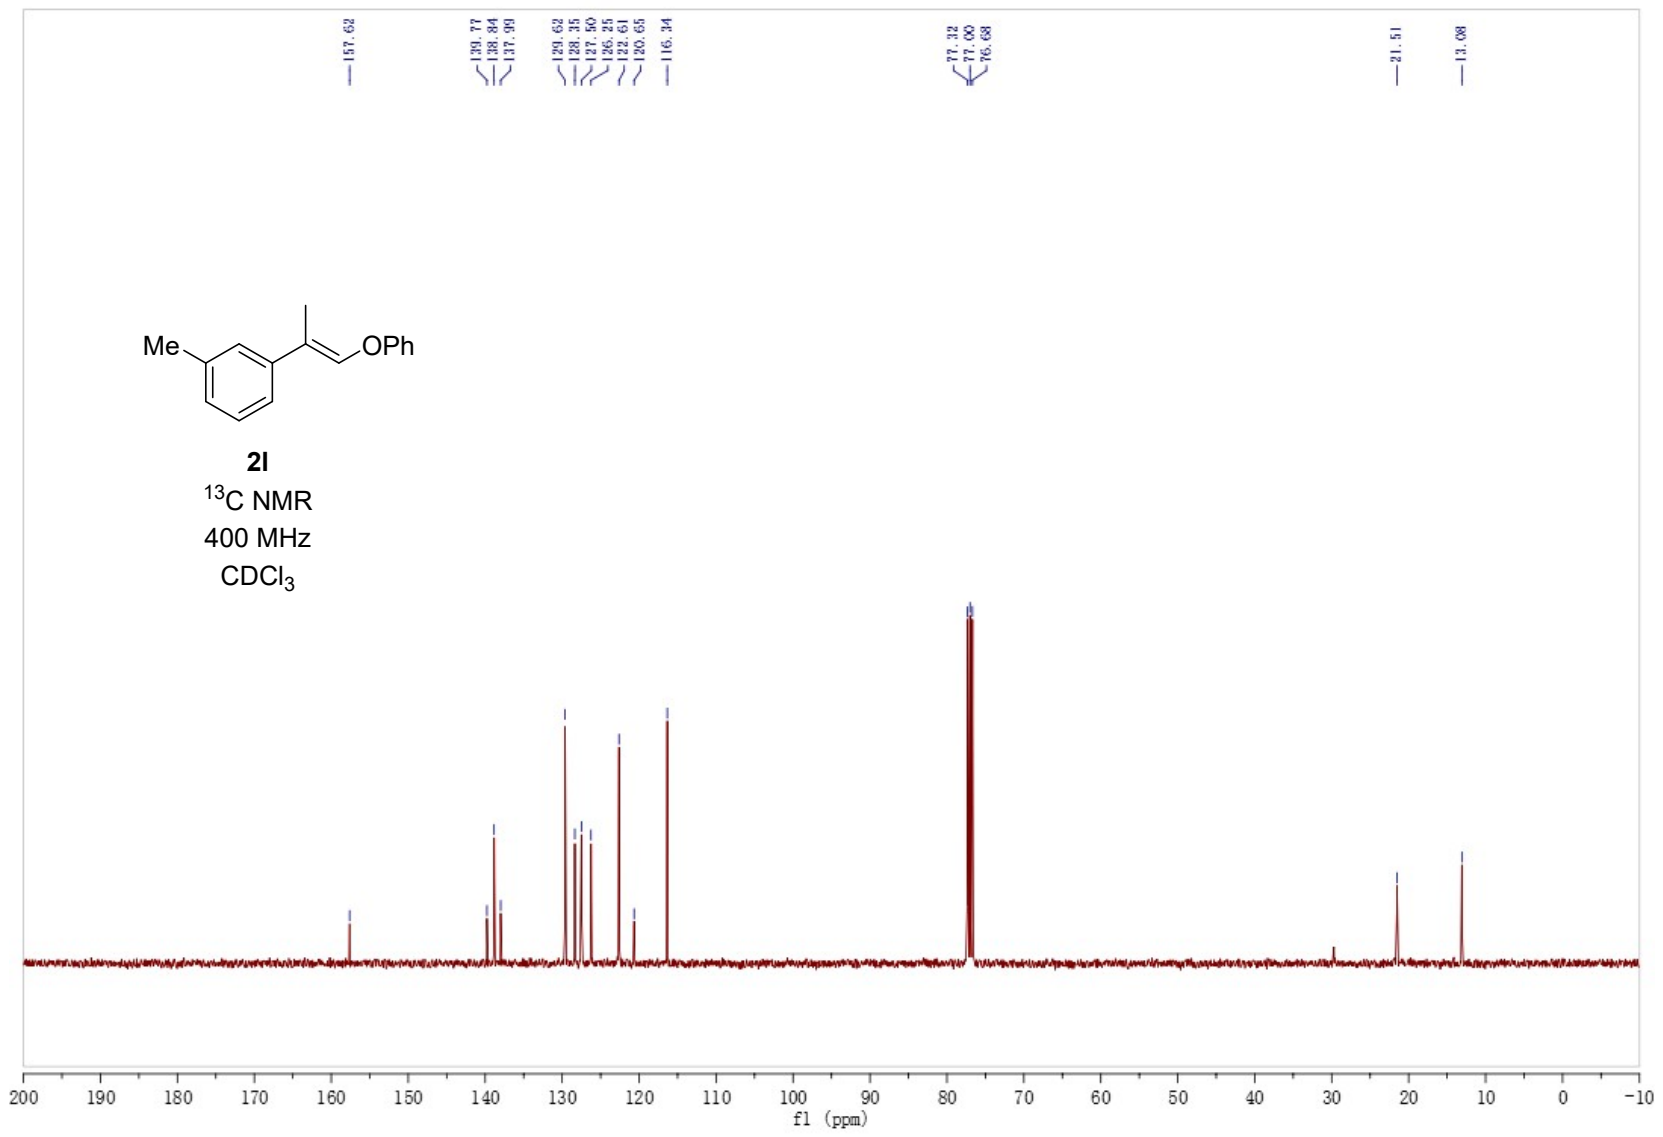

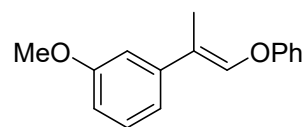

**2m**

<sup>1</sup>H NMR  
500 MHz  
CDCl<sub>3</sub>

7.232  
7.216  
7.200  
7.144  
7.127  
6.959  
6.942  
6.901  
6.886  
6.838  
6.766  
6.705  
6.703

3.707

2.038

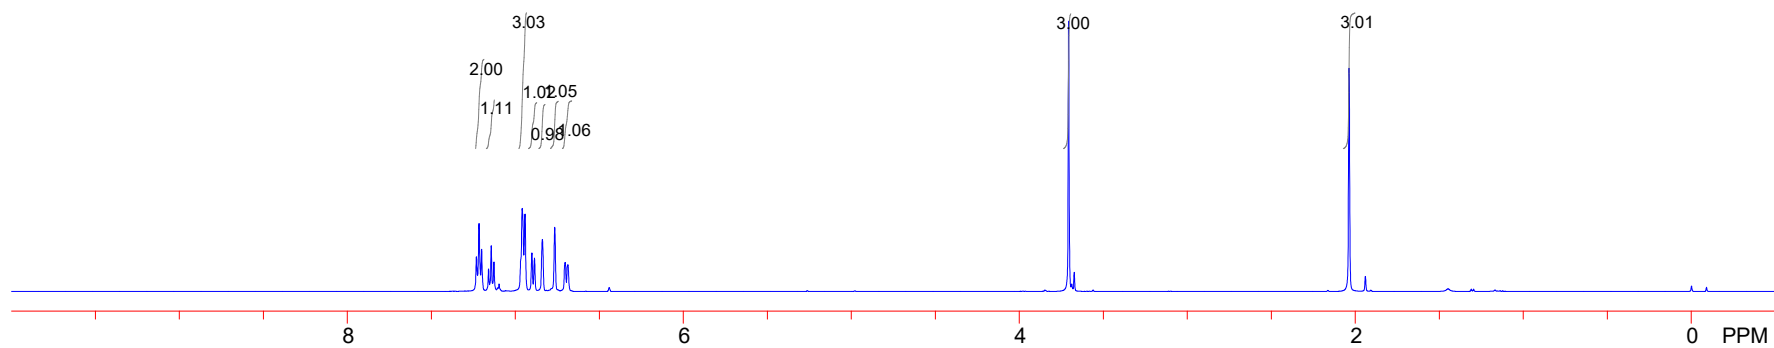

S125



**2m**

<sup>13</sup>C NMR

500 MHz

CDCl<sub>3</sub>

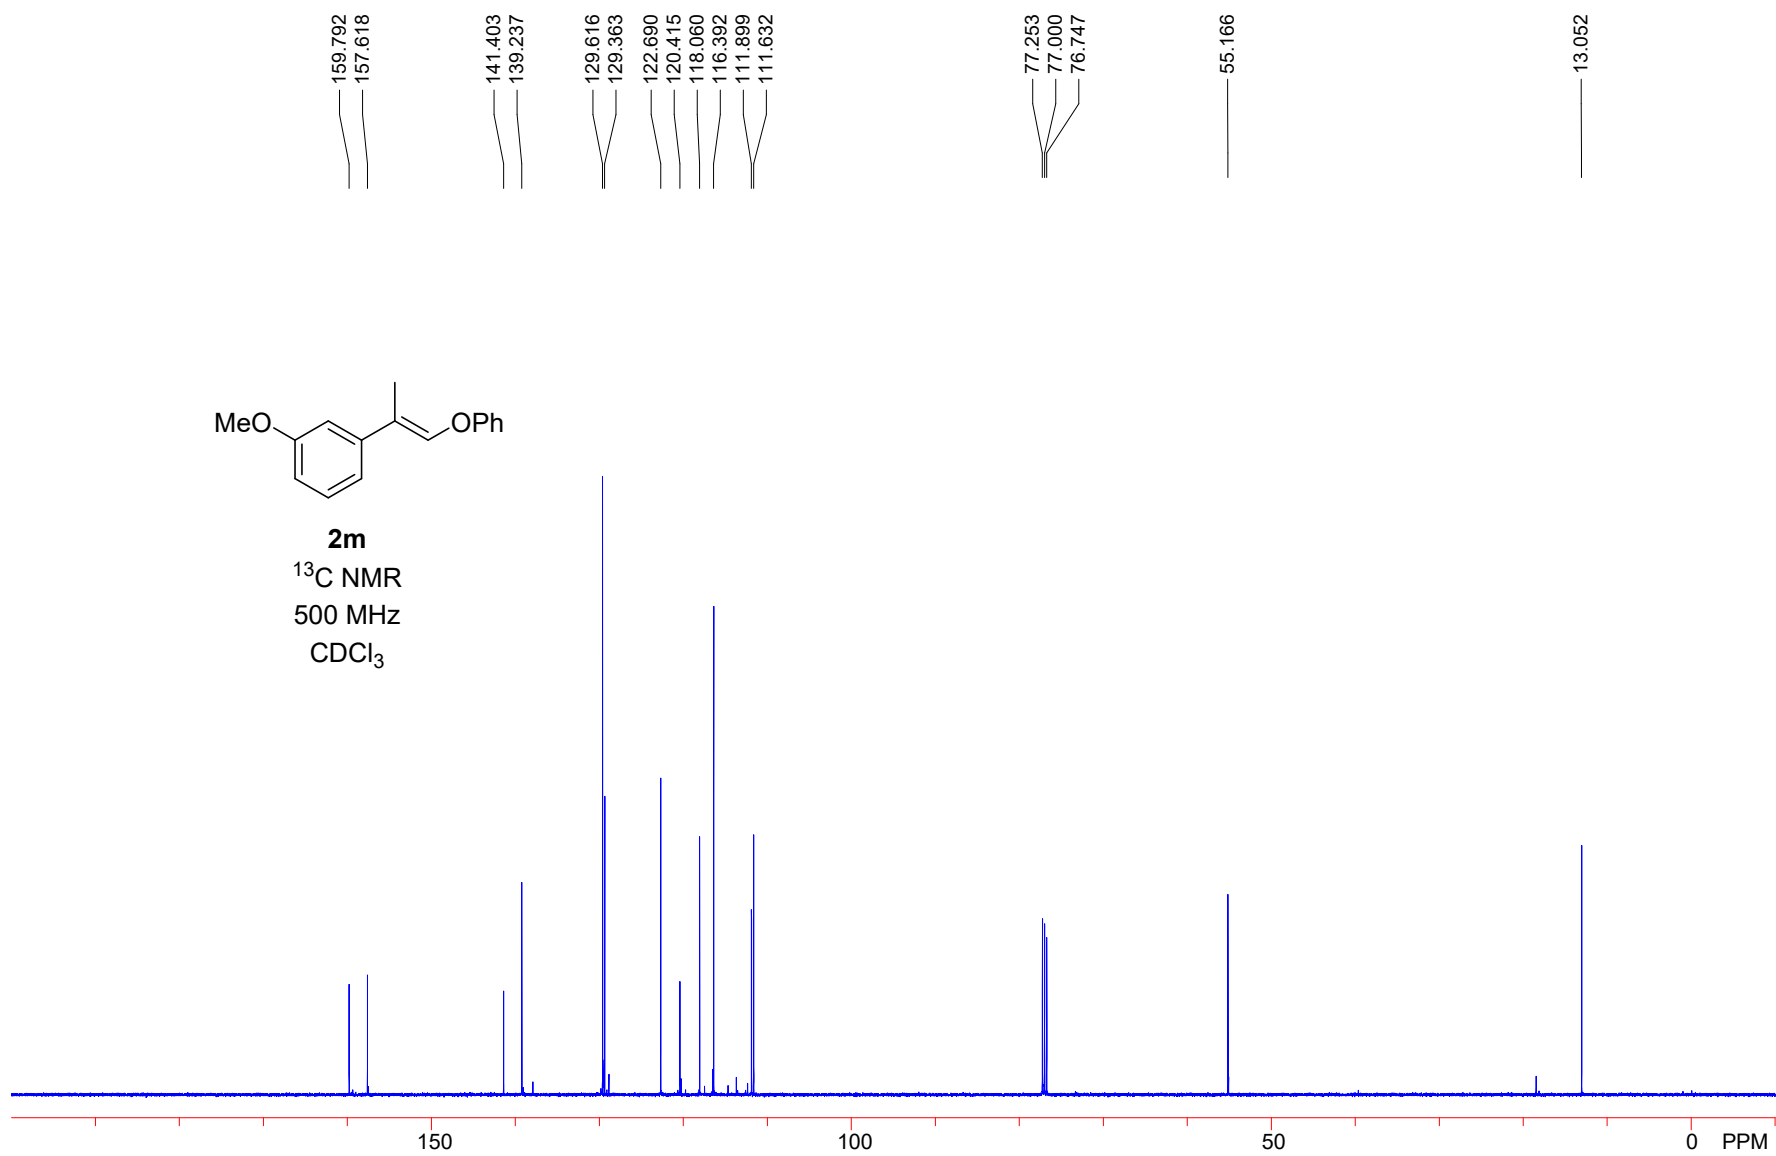

S126

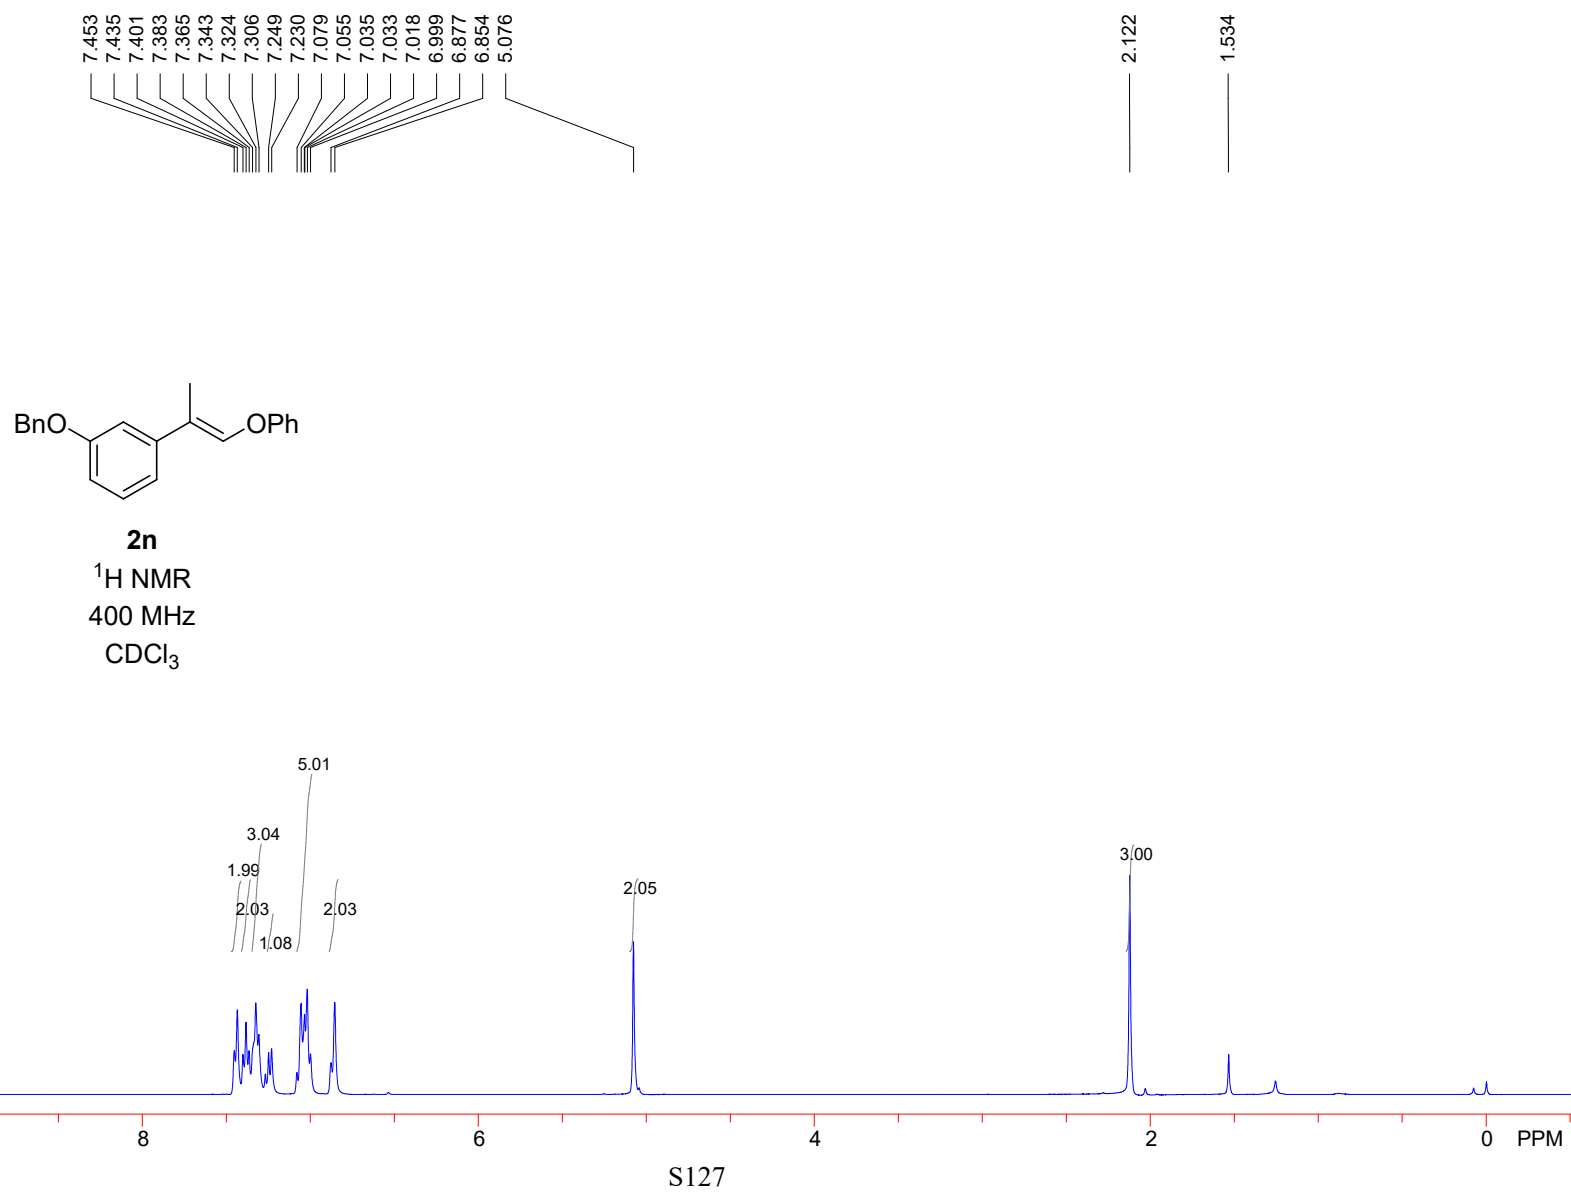

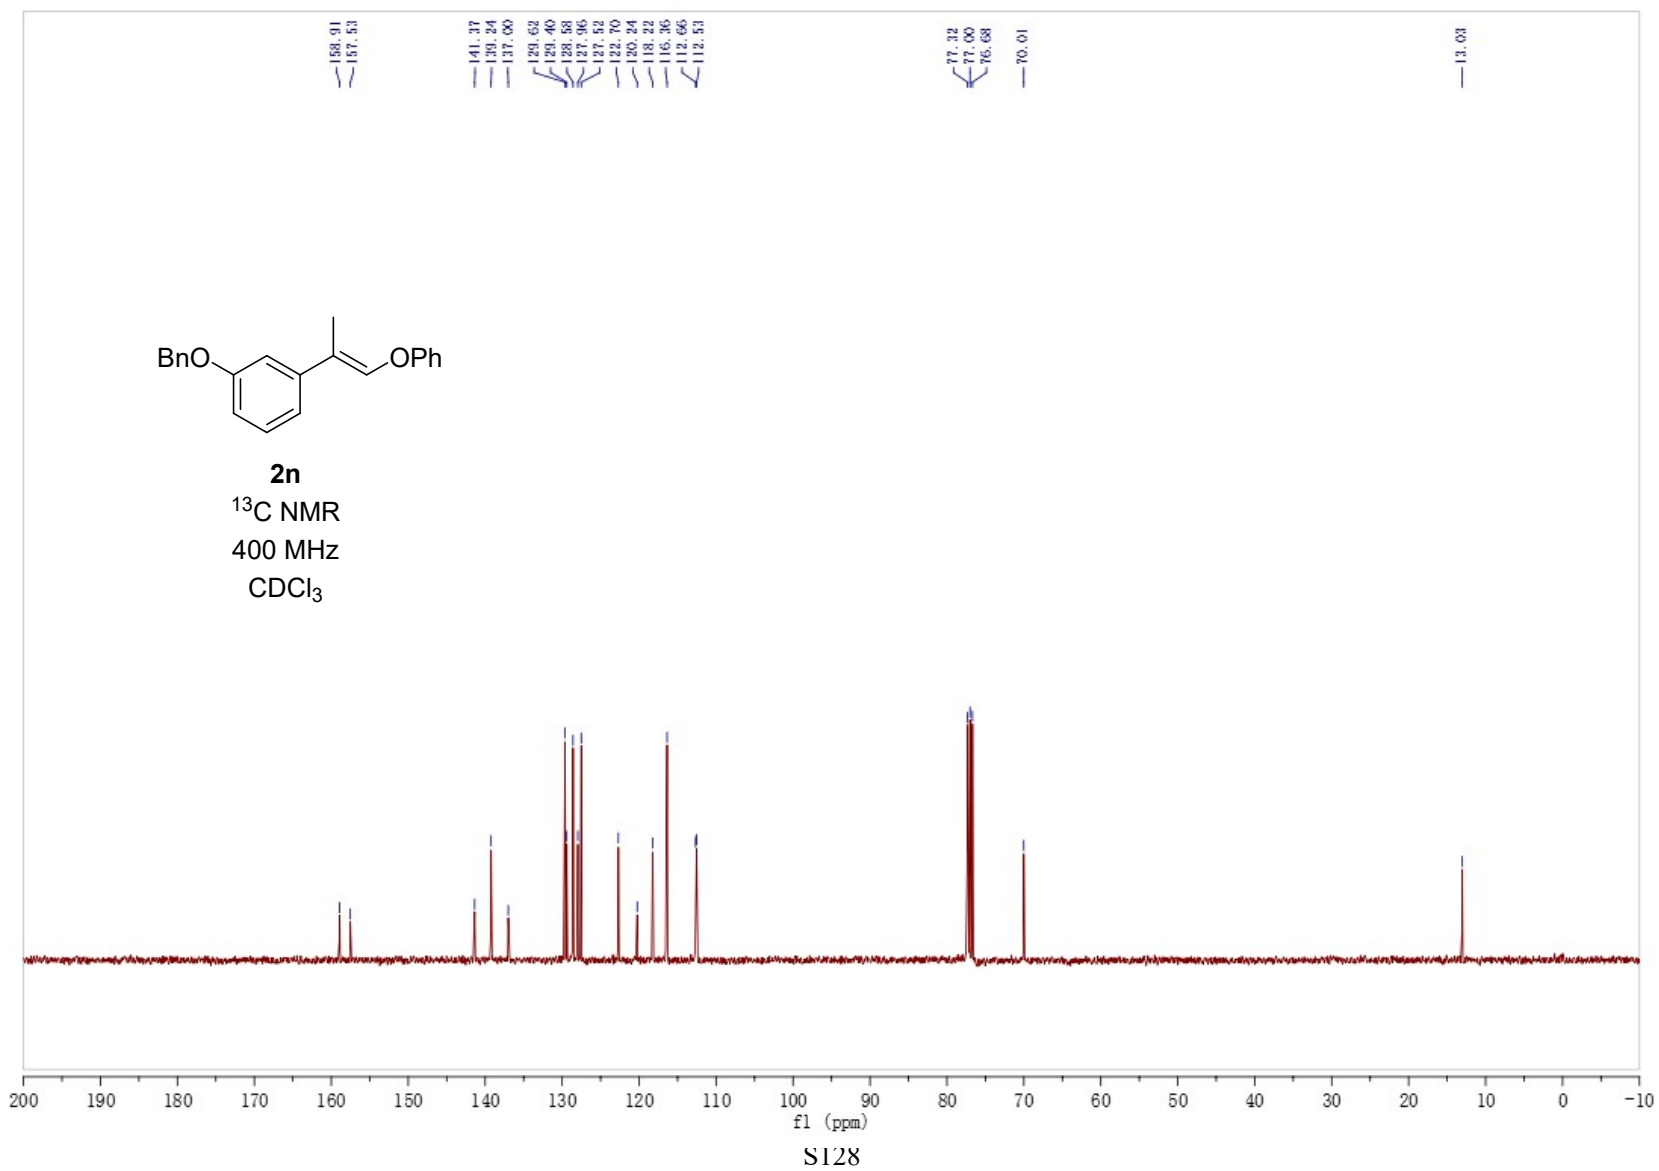



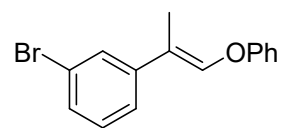

**2o**  
<sup>1</sup>H NMR  
500 MHz  
CDCl<sub>3</sub>

7.521  
7.518  
7.361  
7.344  
7.342  
7.326  
7.309  
7.305  
7.304  
7.287  
7.191  
7.176  
7.071  
7.050  
7.034  
6.851  
6.848

2.110

3.96  
2.96  
0.99  
1.03  
1.00

3.01

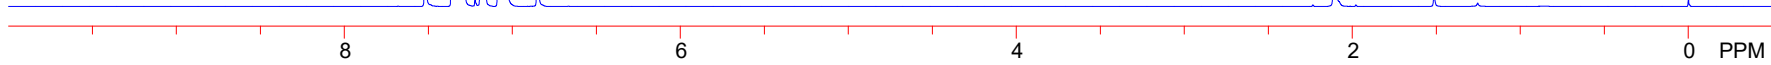

S129

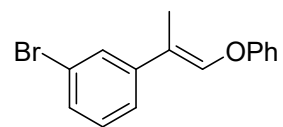

**2o**

$^{13}\text{C}$  NMR  
500 MHz  
 $\text{CDCl}_3$

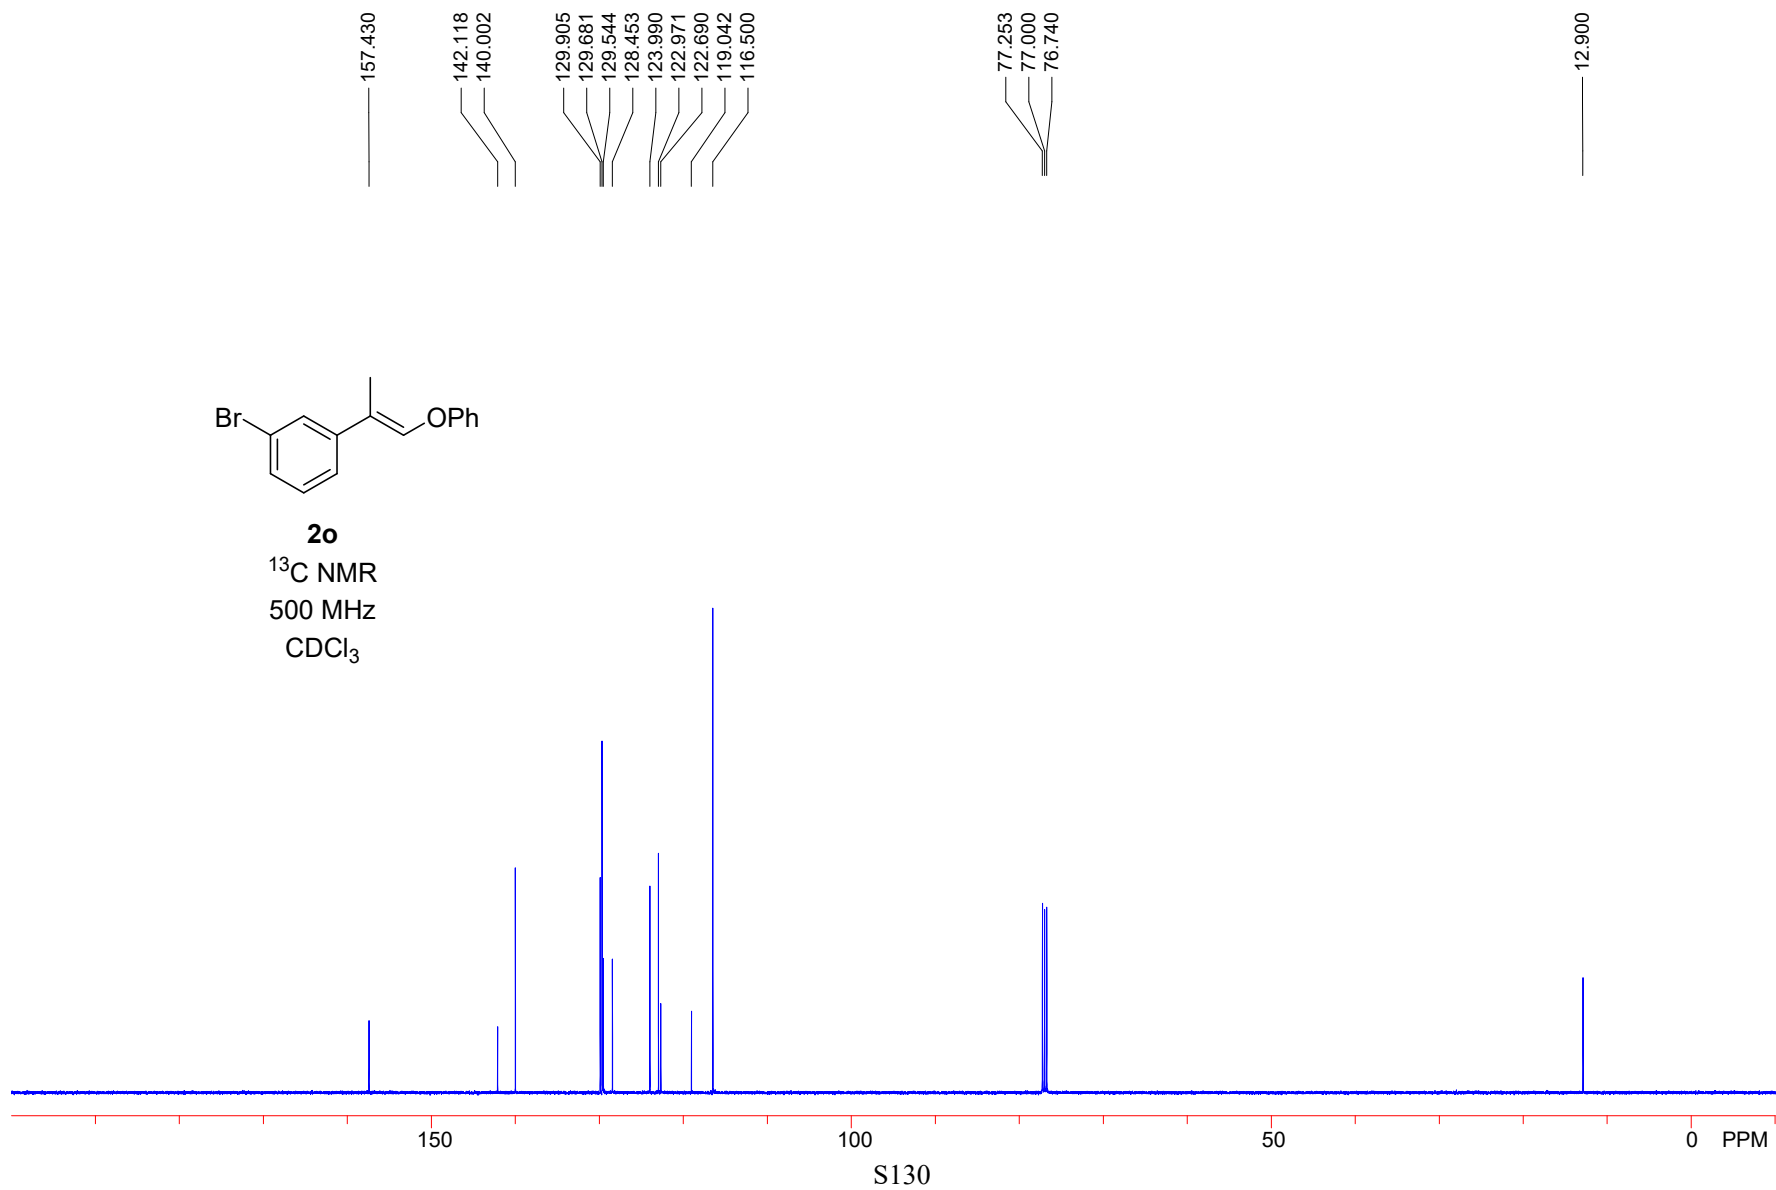

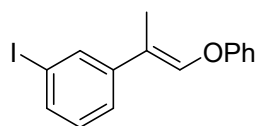

**2p**

<sup>1</sup>H NMR

500 MHz

CDCl<sub>3</sub>

7.521  
7.518  
7.361  
7.344  
7.342  
7.326  
7.309  
7.305  
7.304  
7.287  
7.191  
7.176  
7.071  
7.050  
7.034  
6.851  
6.848

2.110

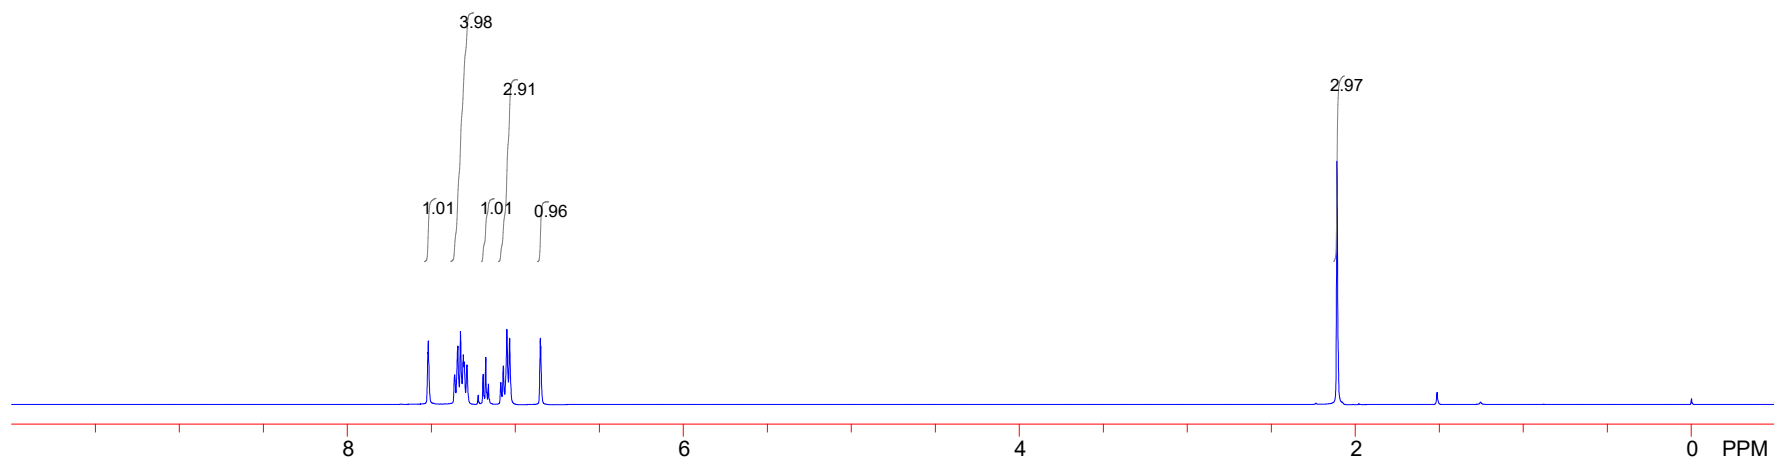

S131

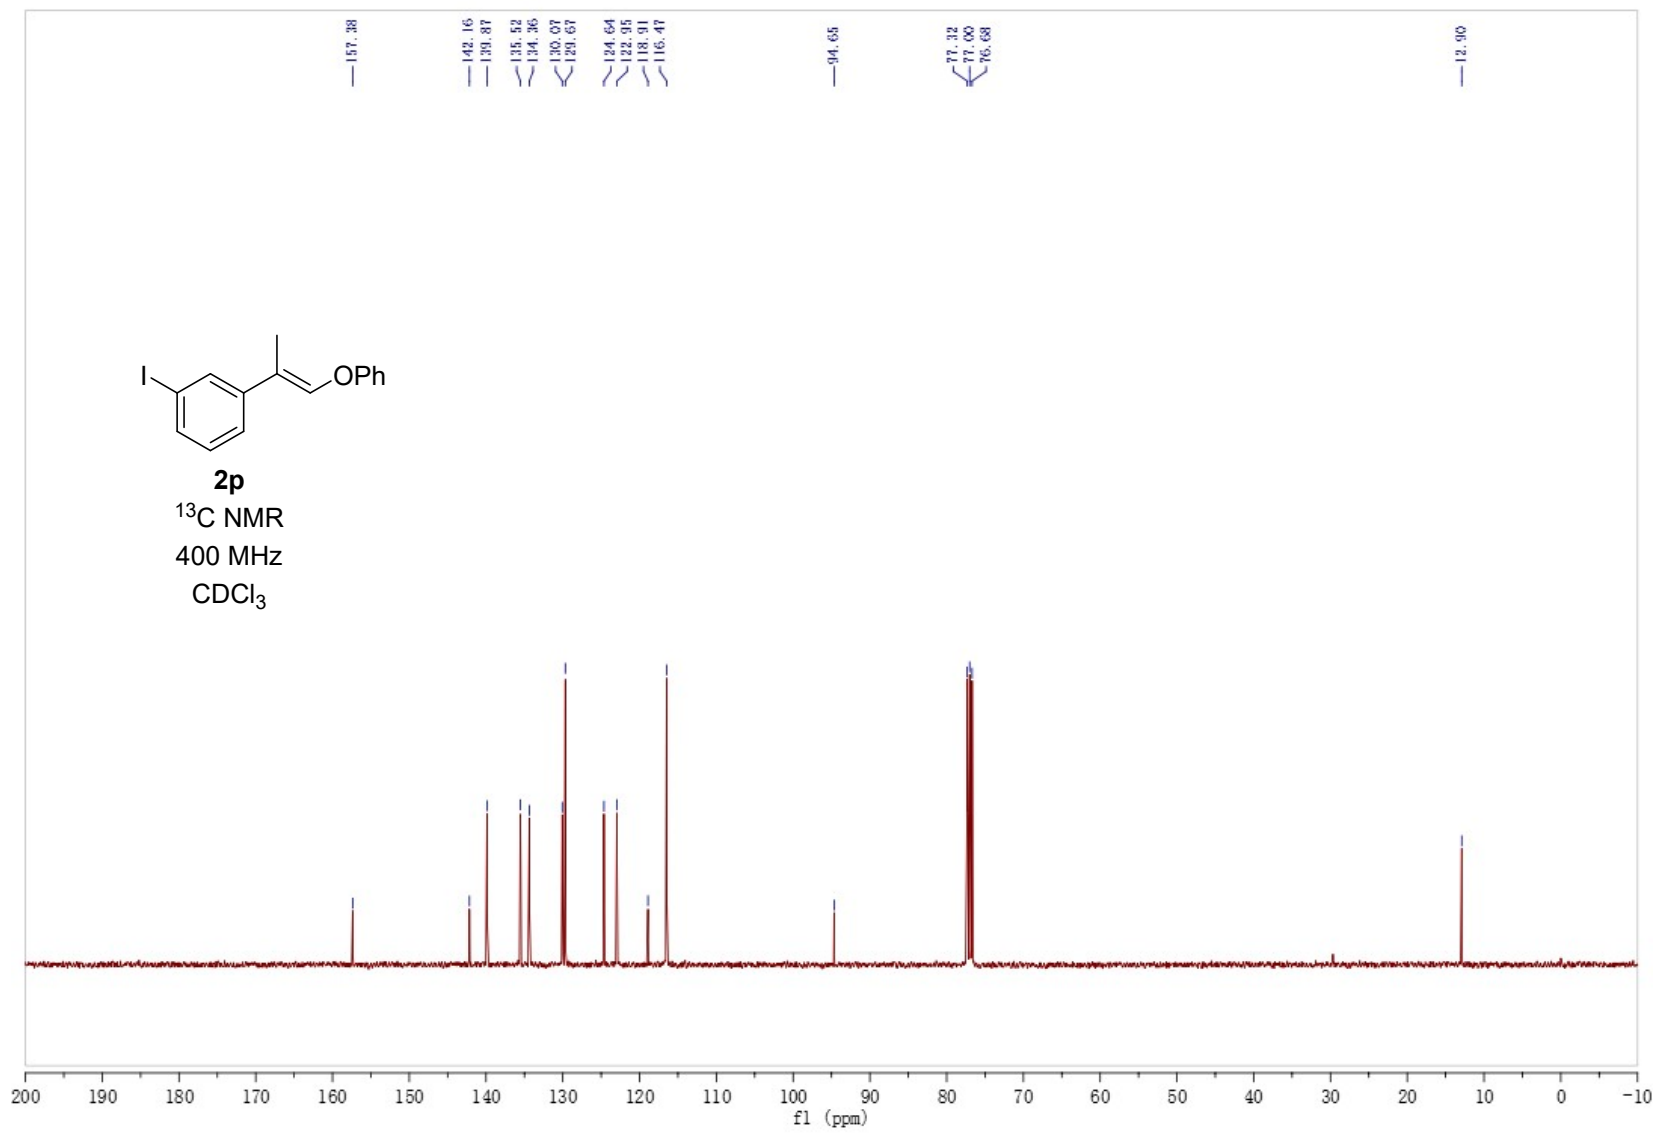

S132

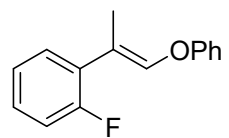

**2q**

<sup>1</sup>H NMR  
500 MHz  
CDCl<sub>3</sub>

7.339  
7.324  
7.316  
7.307  
7.304  
7.300  
7.120  
7.105  
7.090  
7.071  
7.058  
7.055  
7.044  
7.040  
6.832  
6.831

2.133

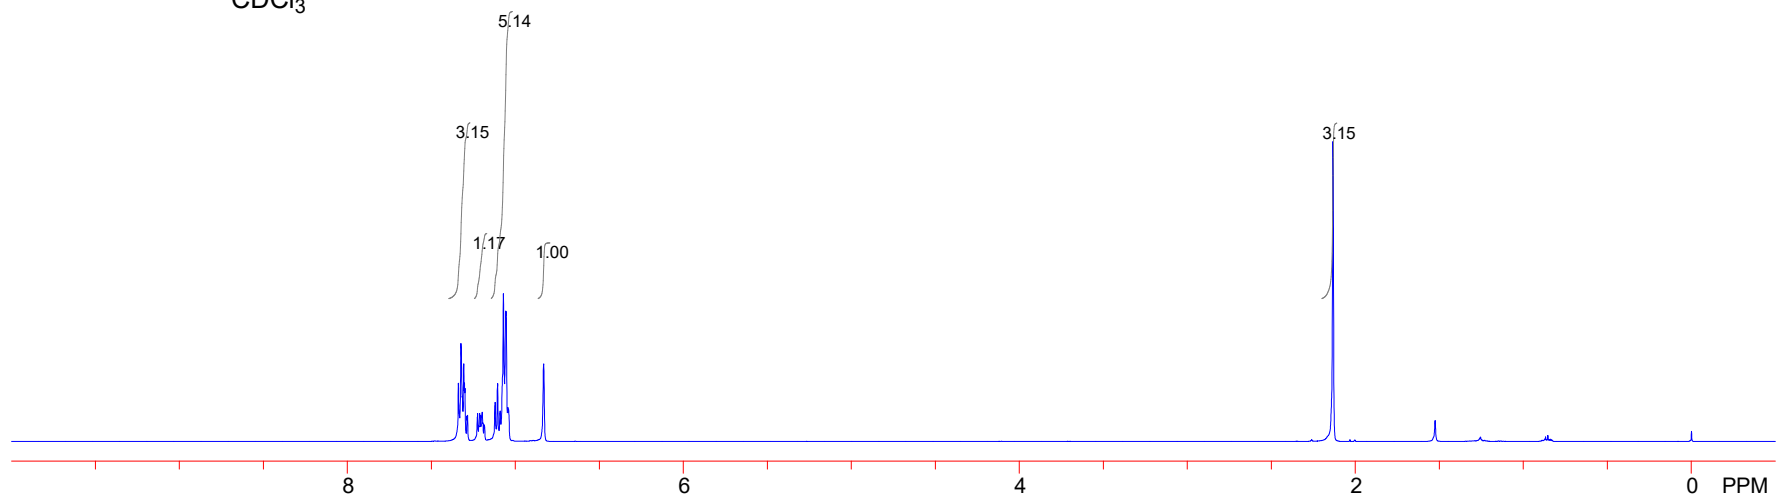

S133

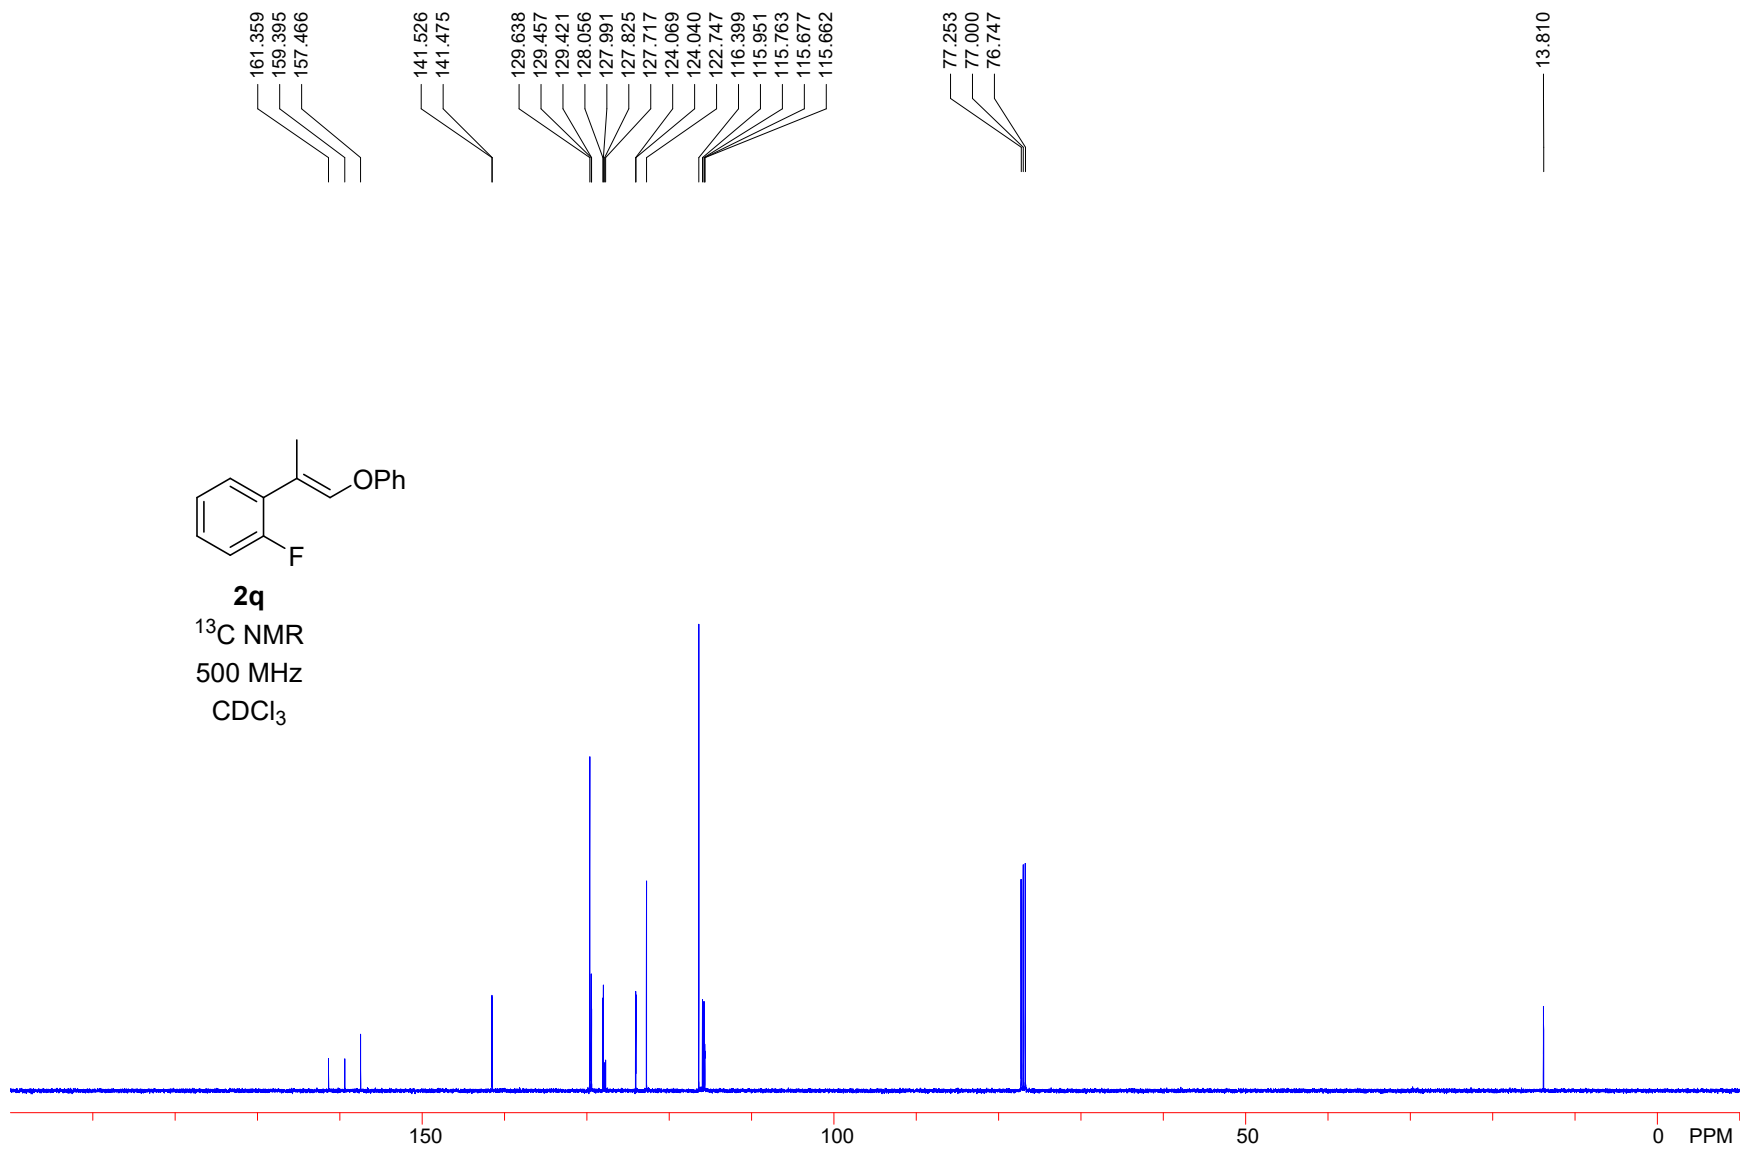

S134

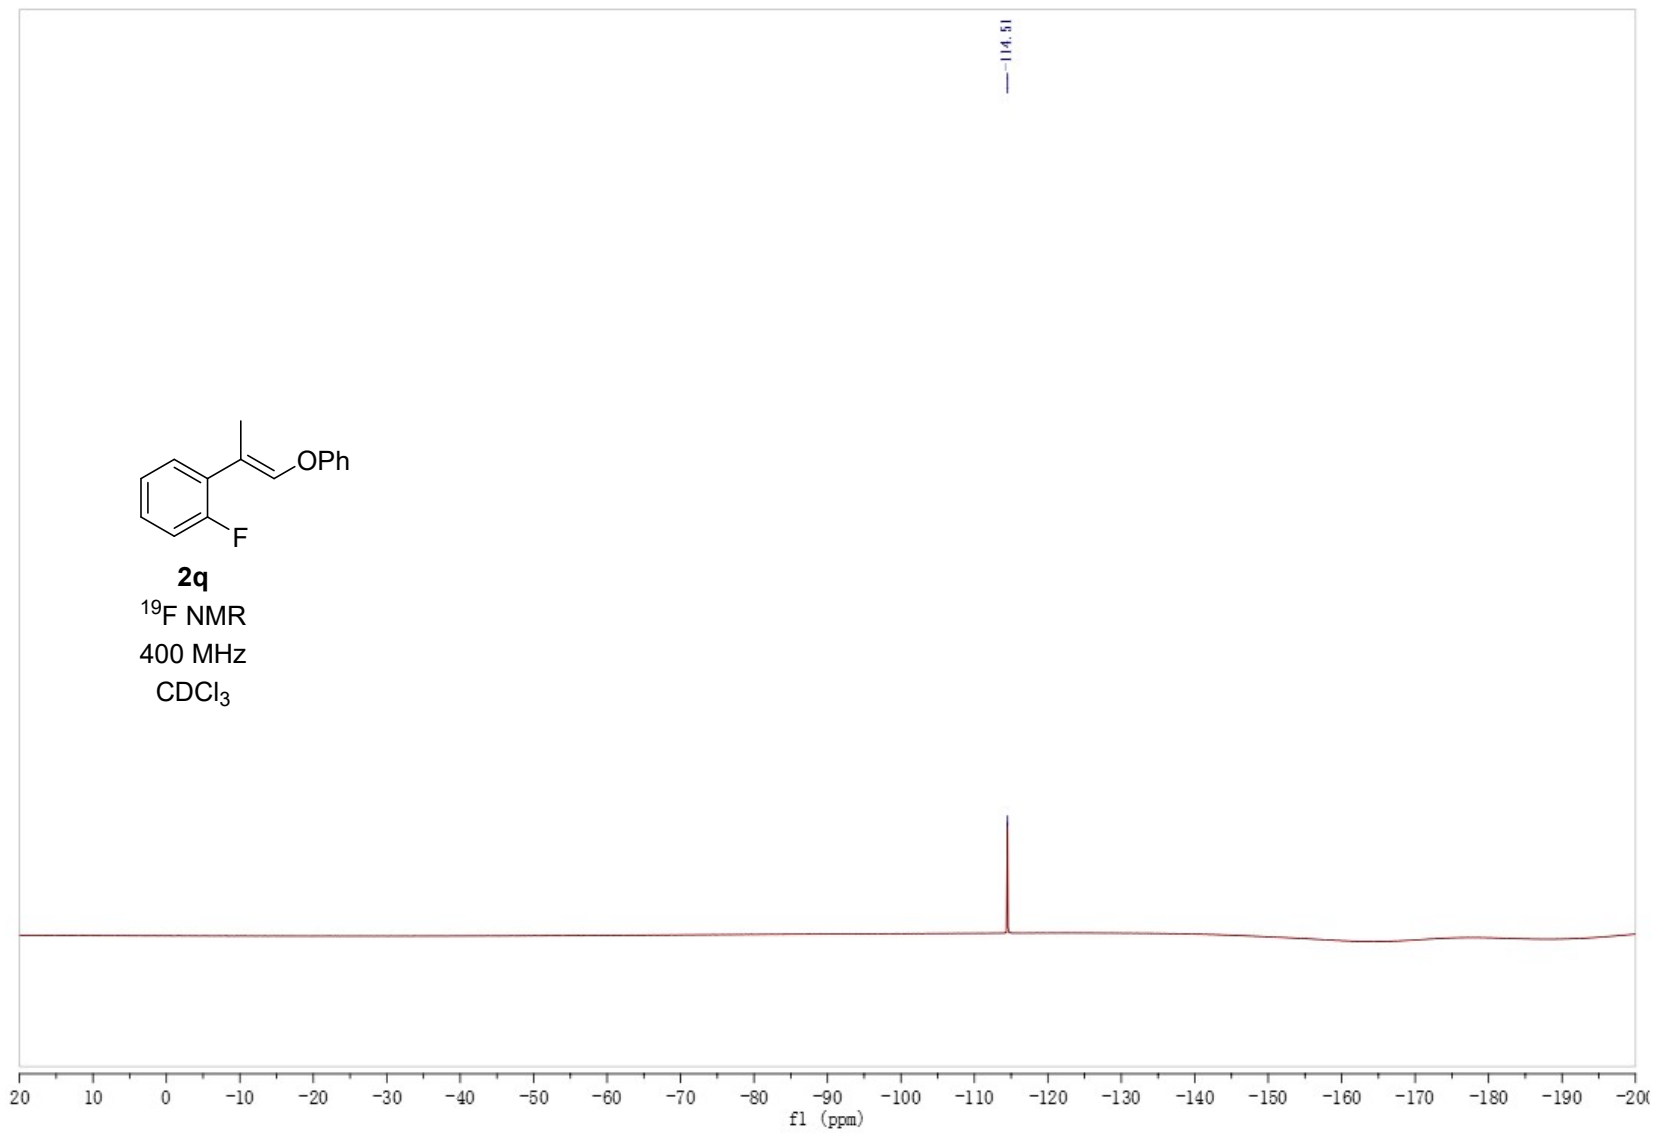

S135

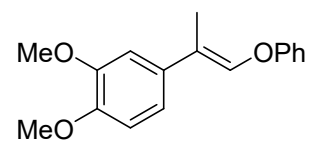

**2r**

<sup>1</sup>H NMR  
500 MHz  
CDCl<sub>3</sub>

7.331  
7.315  
7.299  
7.058  
7.046  
7.041  
7.039  
6.932  
6.912  
6.908  
6.846  
6.830  
6.774  
6.772

3.892  
3.869

2.124

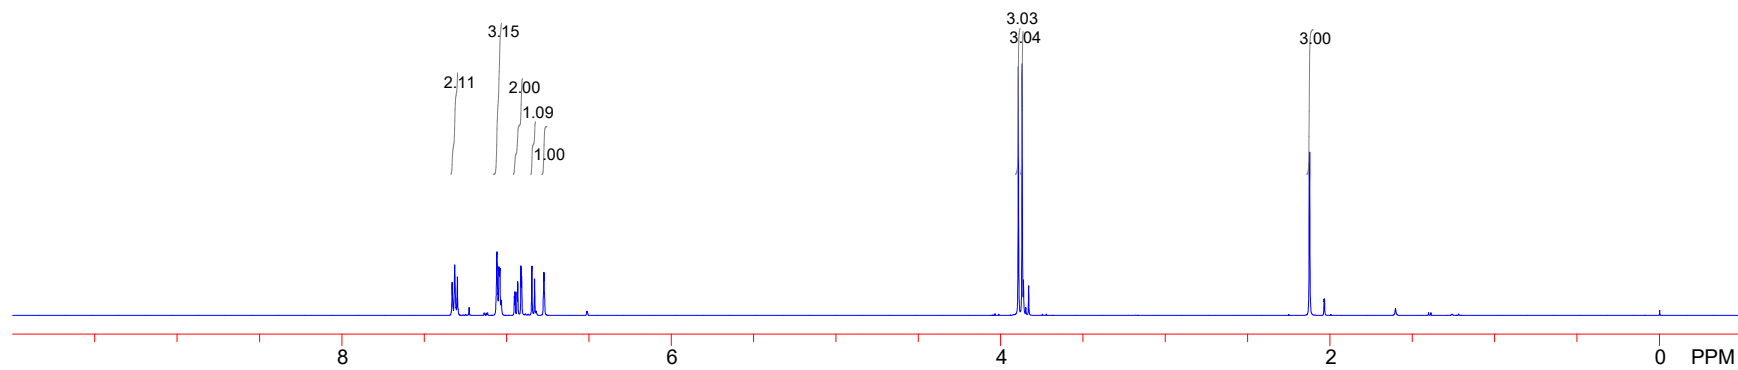

S136





**2r**

<sup>13</sup>C NMR  
500 MHz  
CDCl<sub>3</sub>

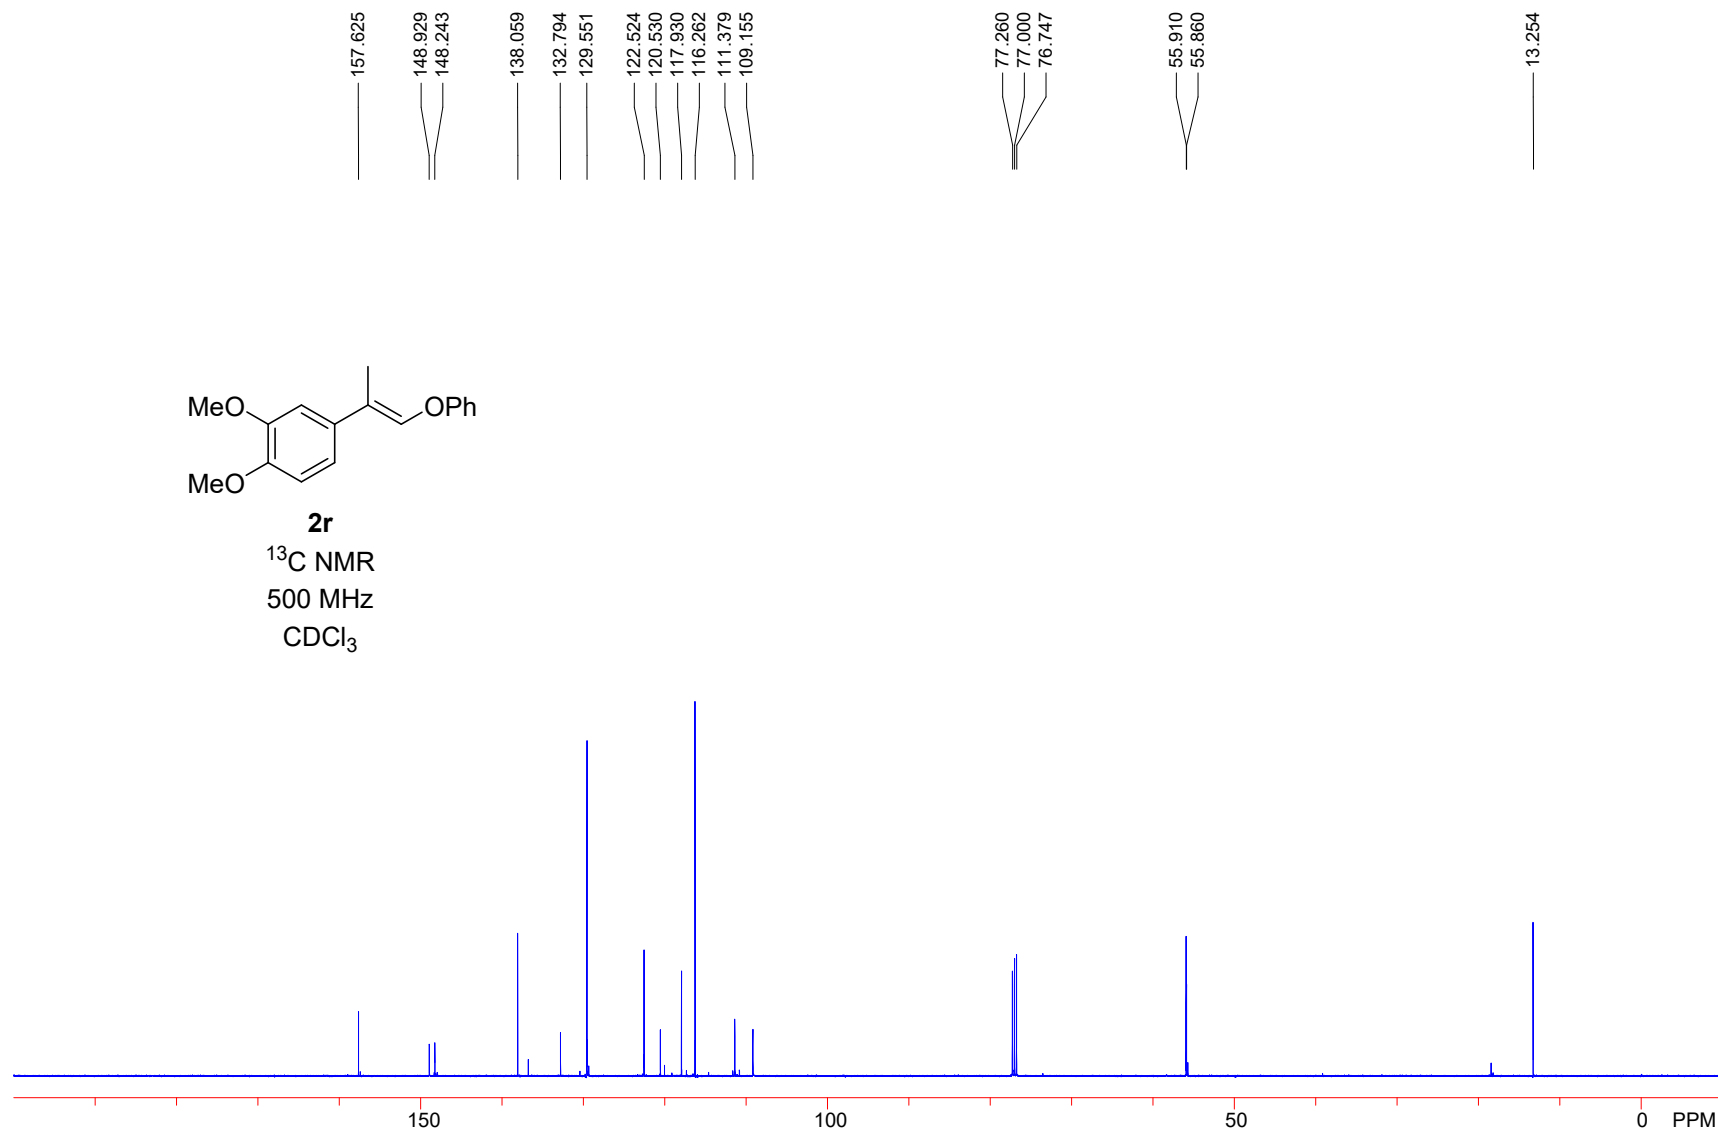

S137

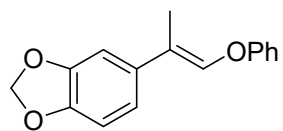

**2s**  
<sup>1</sup>H NMR  
400 MHz  
CDCl<sub>3</sub>

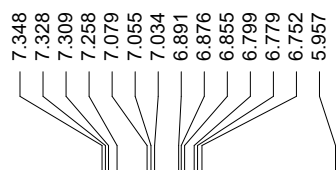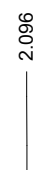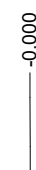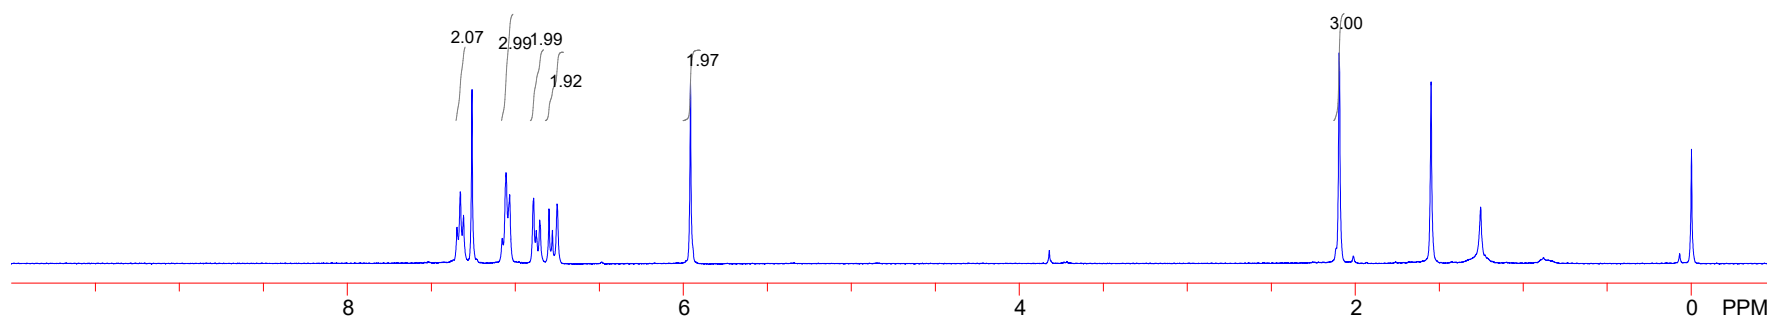

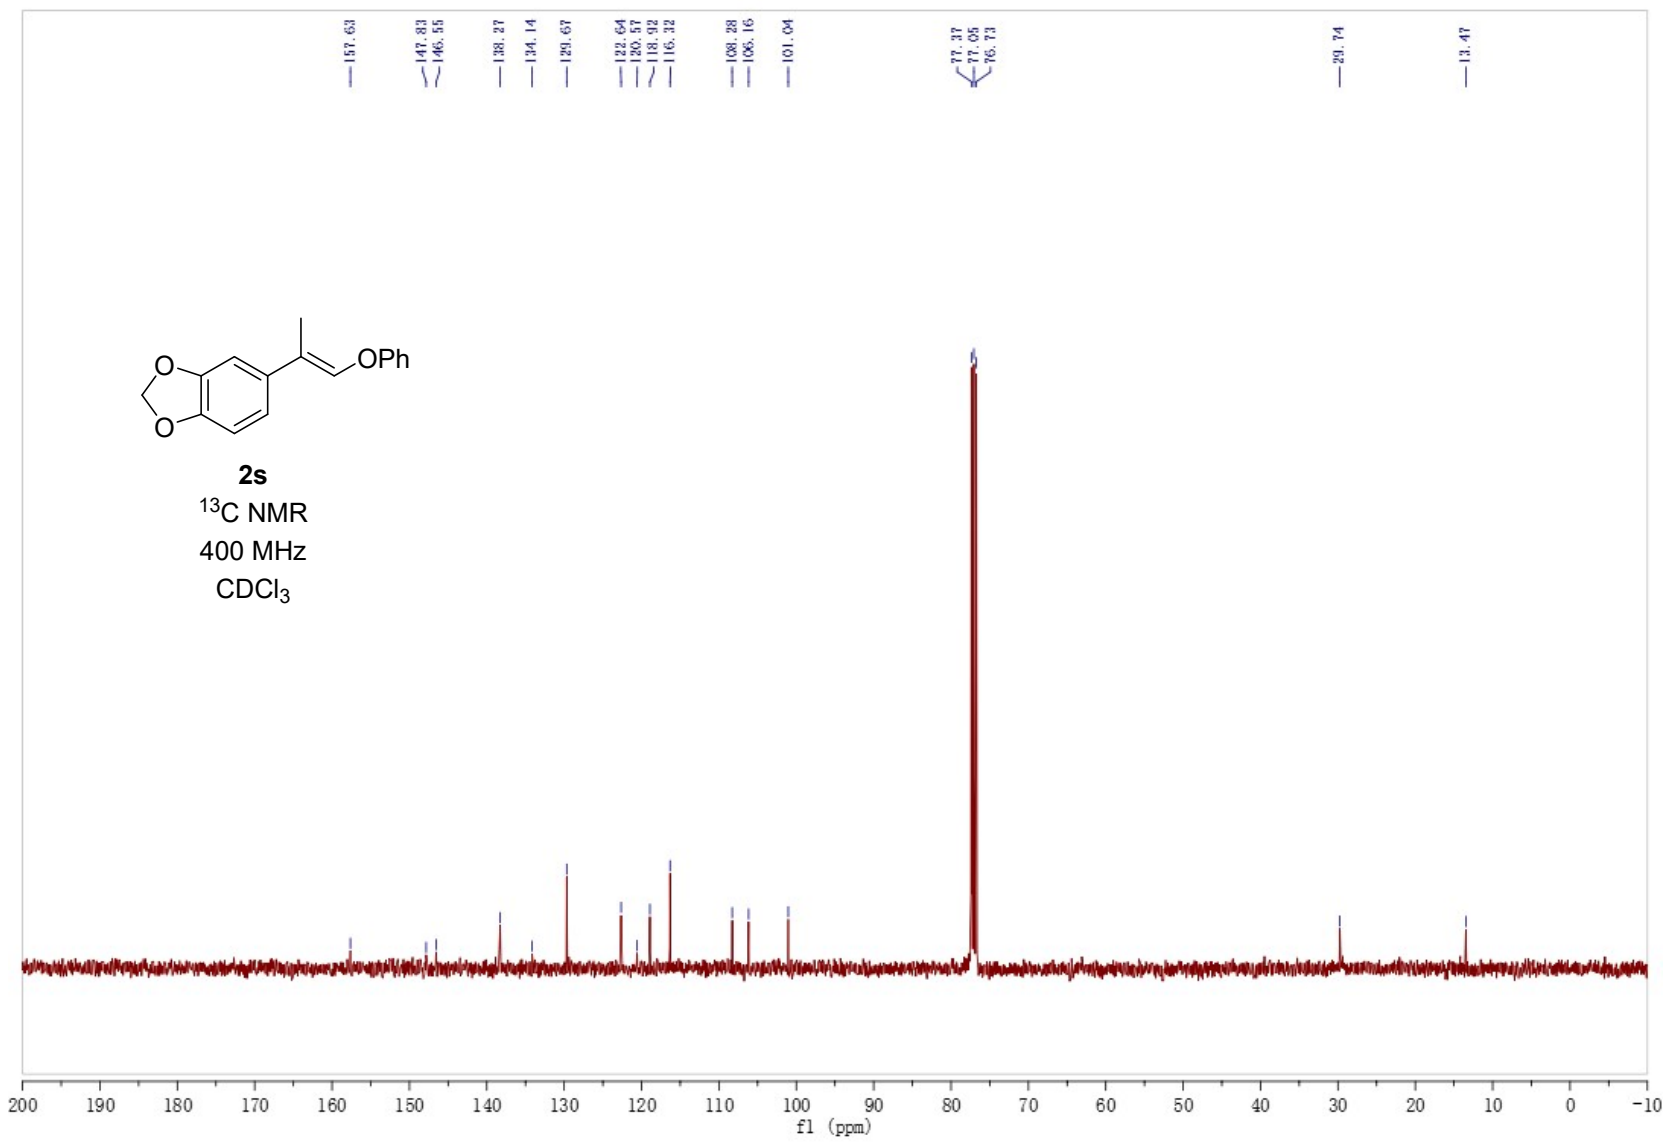

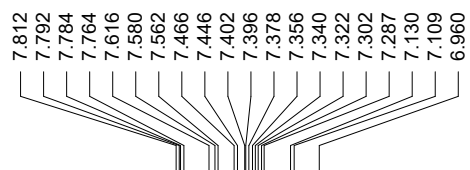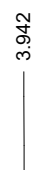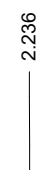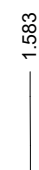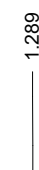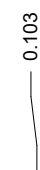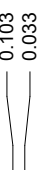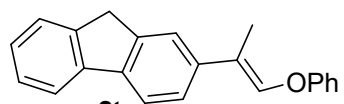

**2t**

<sup>1</sup>H NMR  
400 MHz  
CDCl<sub>3</sub>

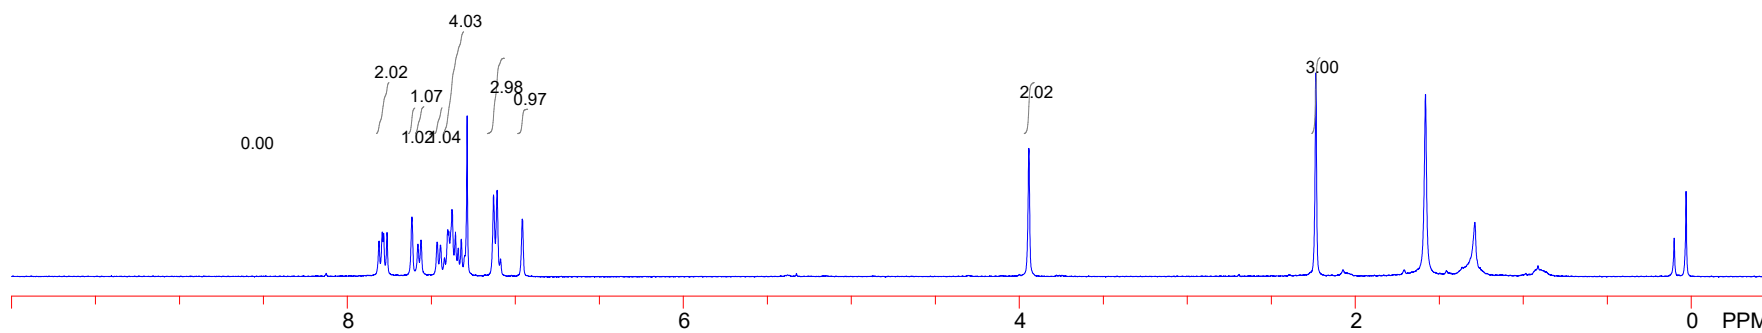

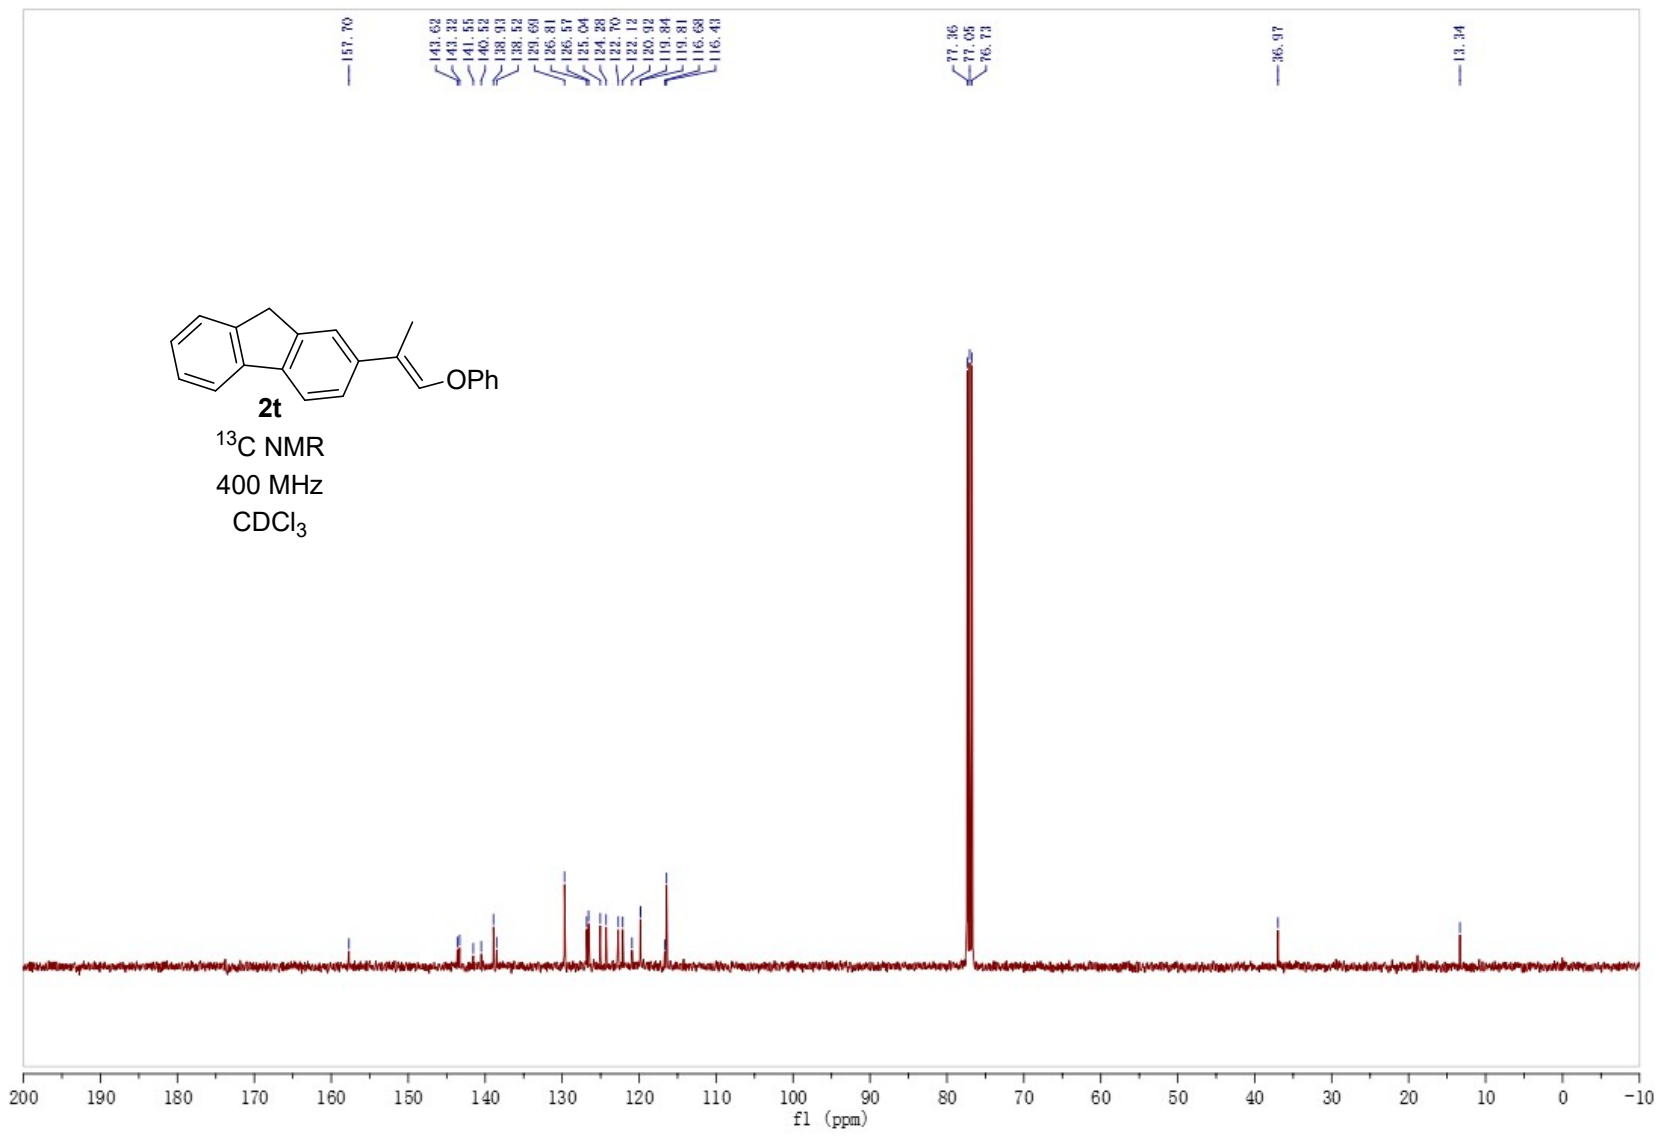

S141

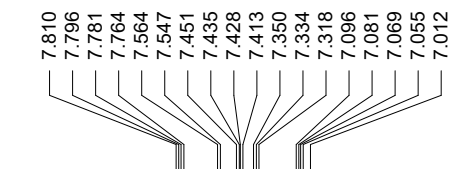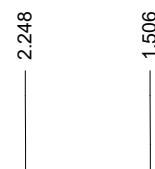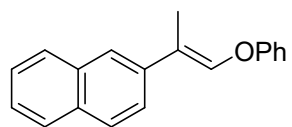

**2u**

<sup>1</sup>H NMR  
500 MHz  
CDCl<sub>3</sub>

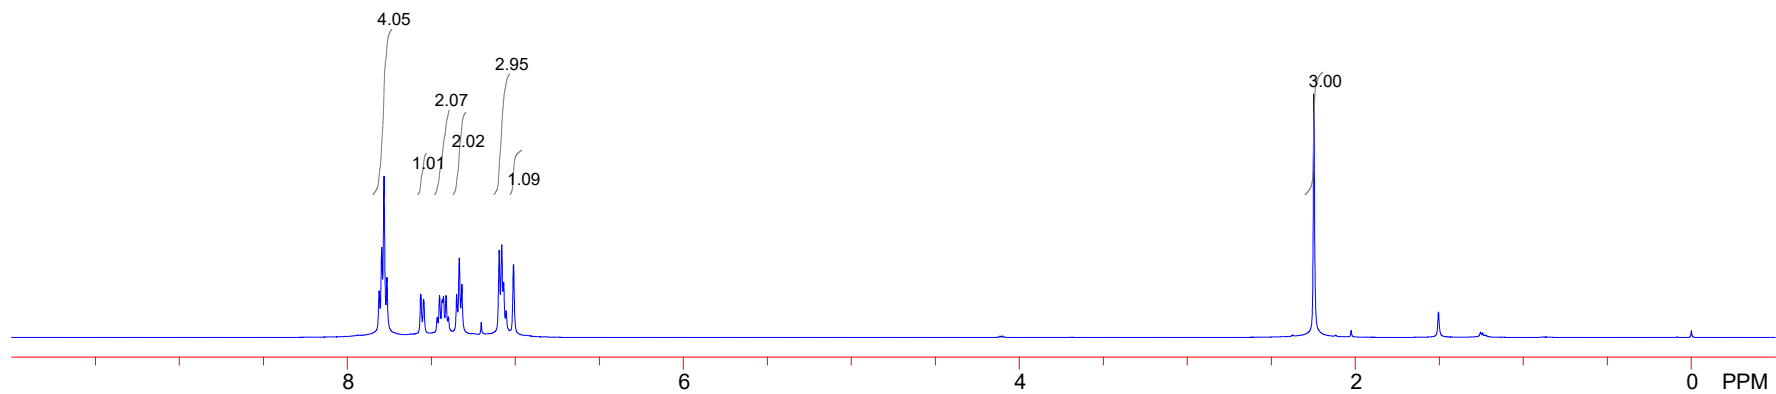

S142

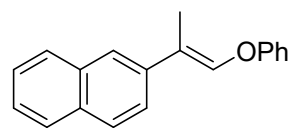

**2u**

<sup>13</sup>C NMR  
500 MHz  
CDCl<sub>3</sub>

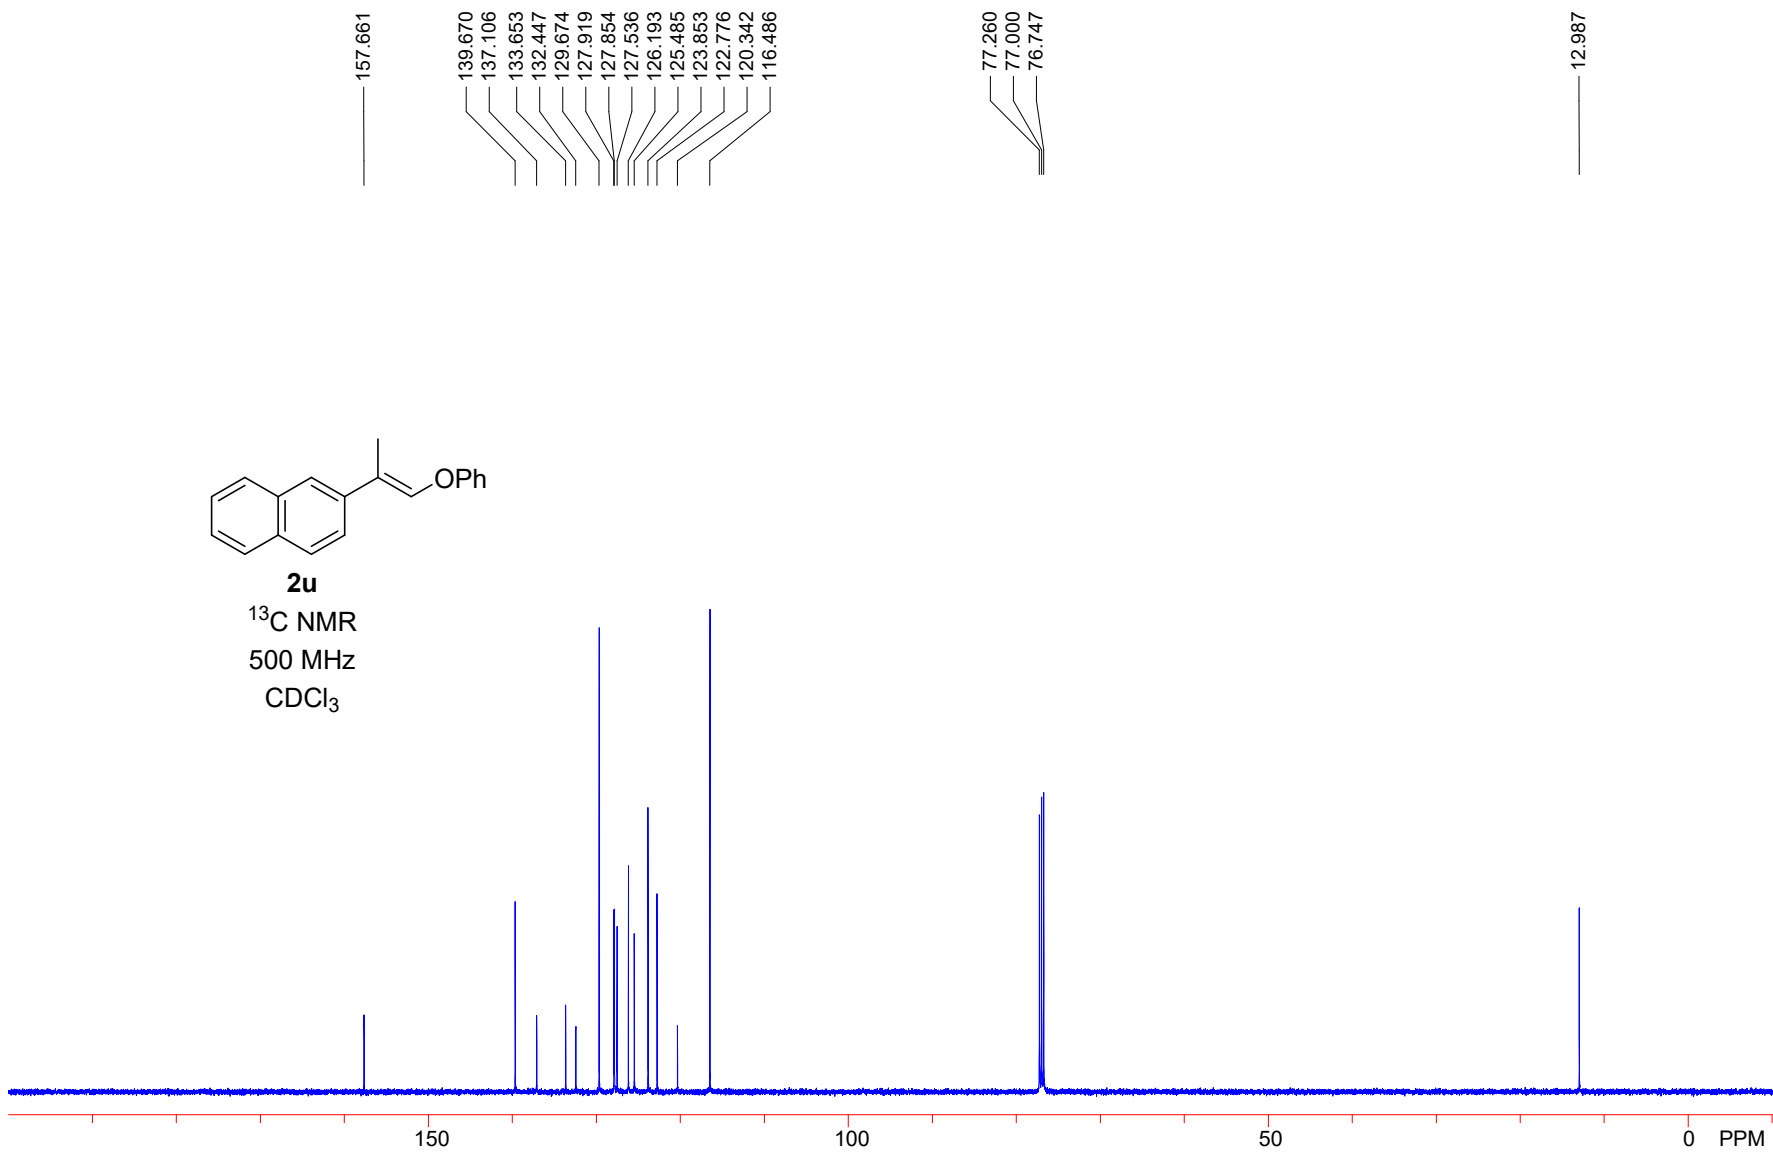

S143

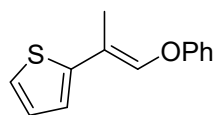

**2v**

<sup>1</sup>H NMR  
500 MHz  
CDCl<sub>3</sub>

7.348  
7.333  
7.318  
7.248  
7.106  
7.099  
7.092  
7.075  
7.057  
7.041  
6.992  
6.987

2.152  
2.113

1.538  
1.255

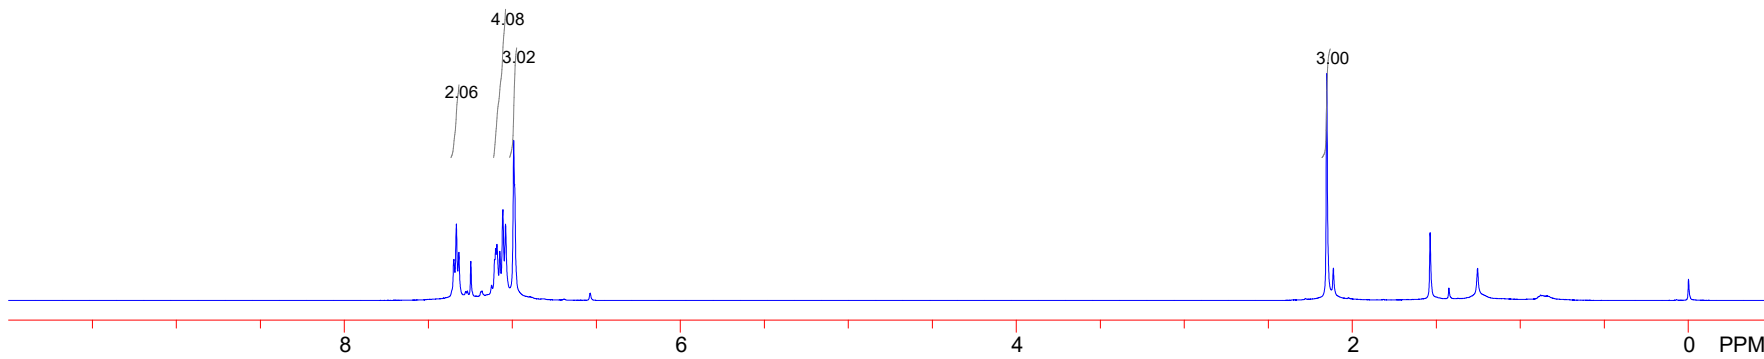

S144



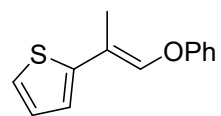

**2v**

<sup>13</sup>C NMR  
500 MHz  
CDCl<sub>3</sub>

138.290  
129.674  
127.240  
122.892  
122.329  
122.264  
116.464  
115.568

13.485

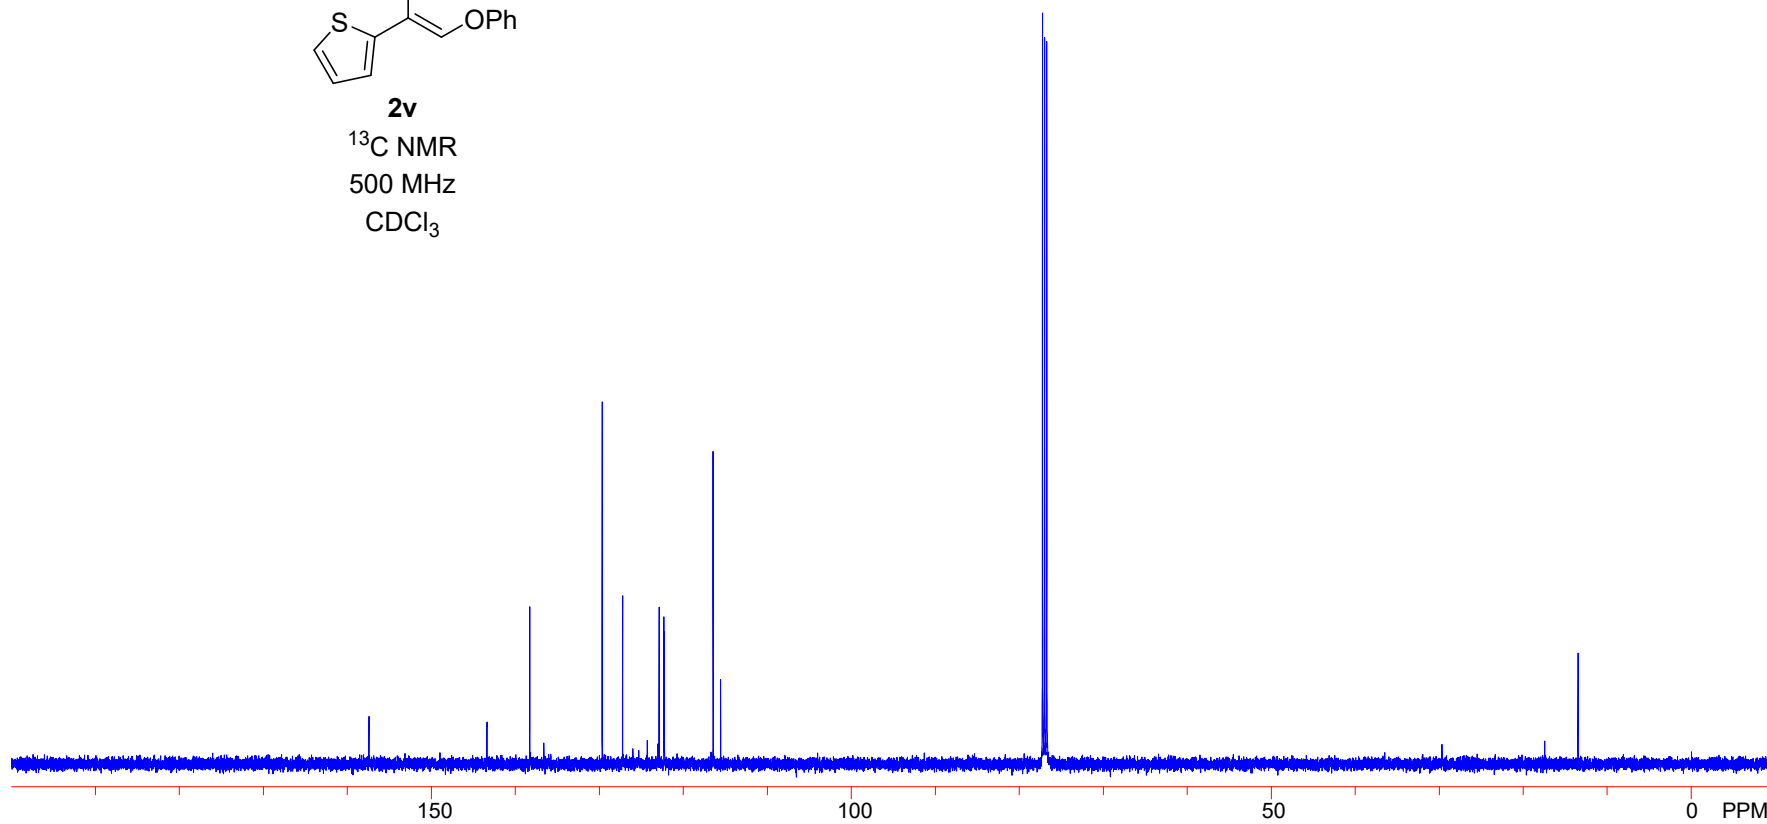

S145

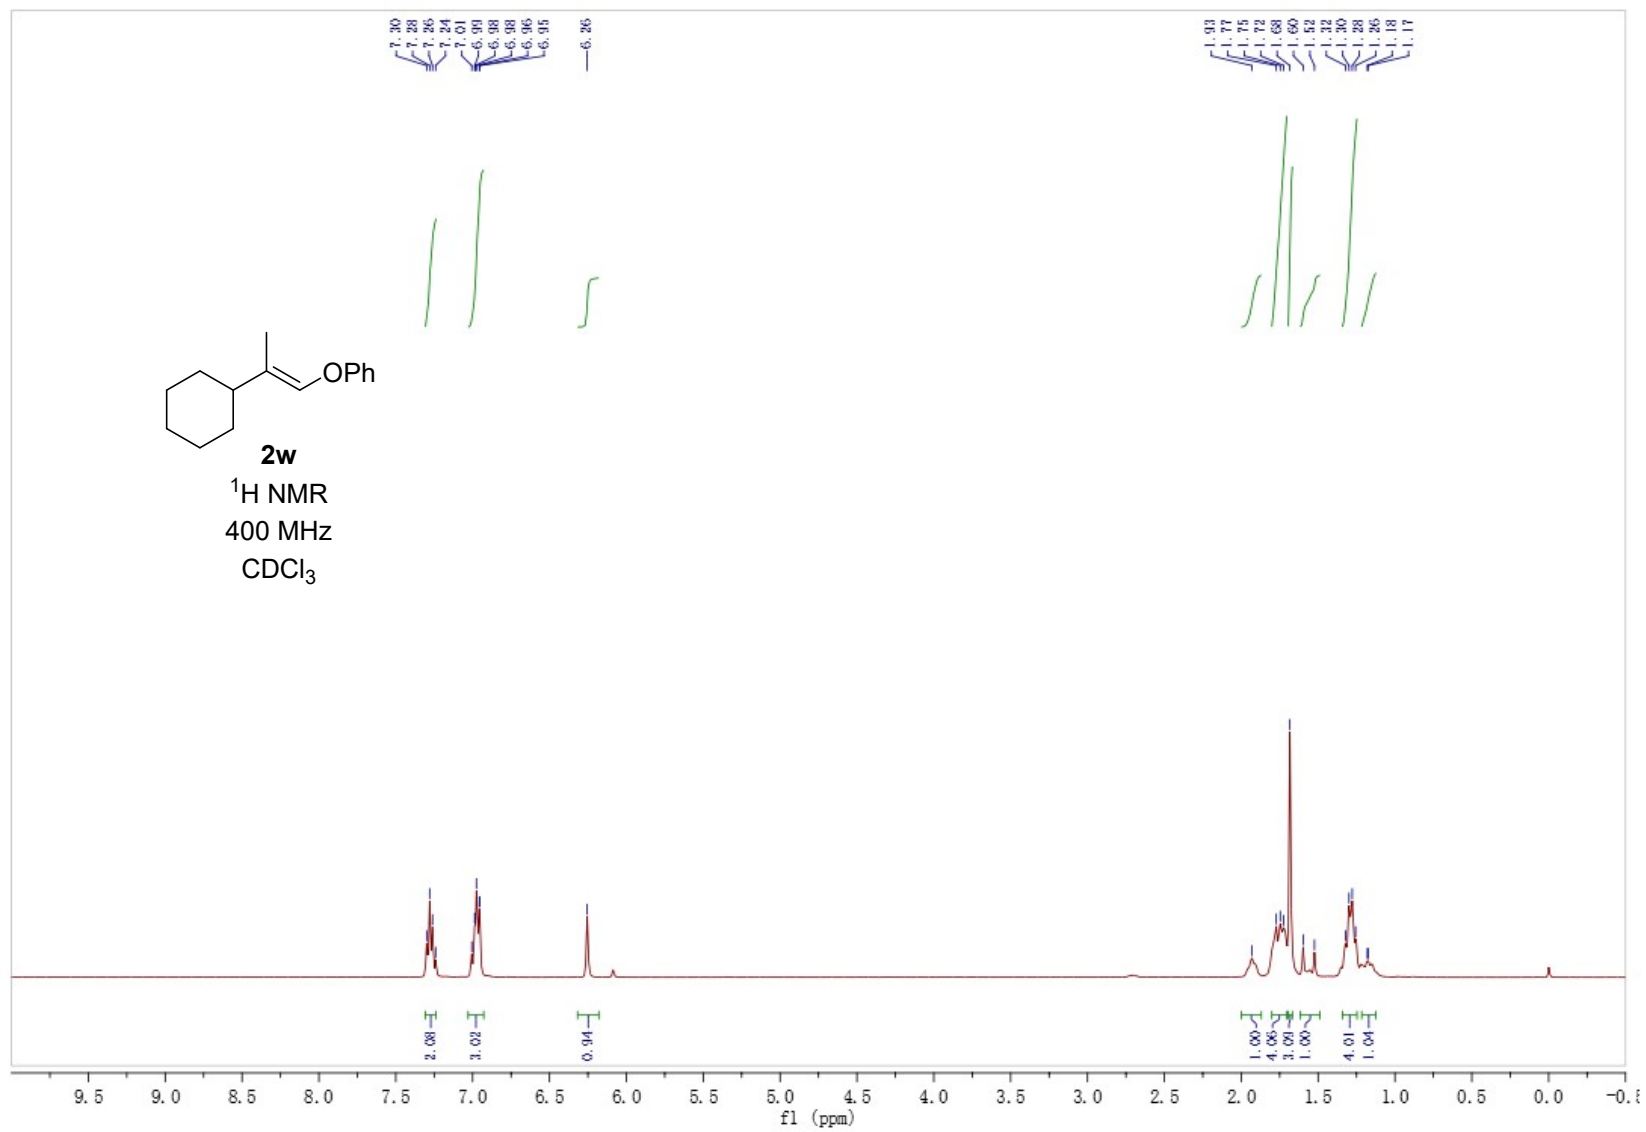

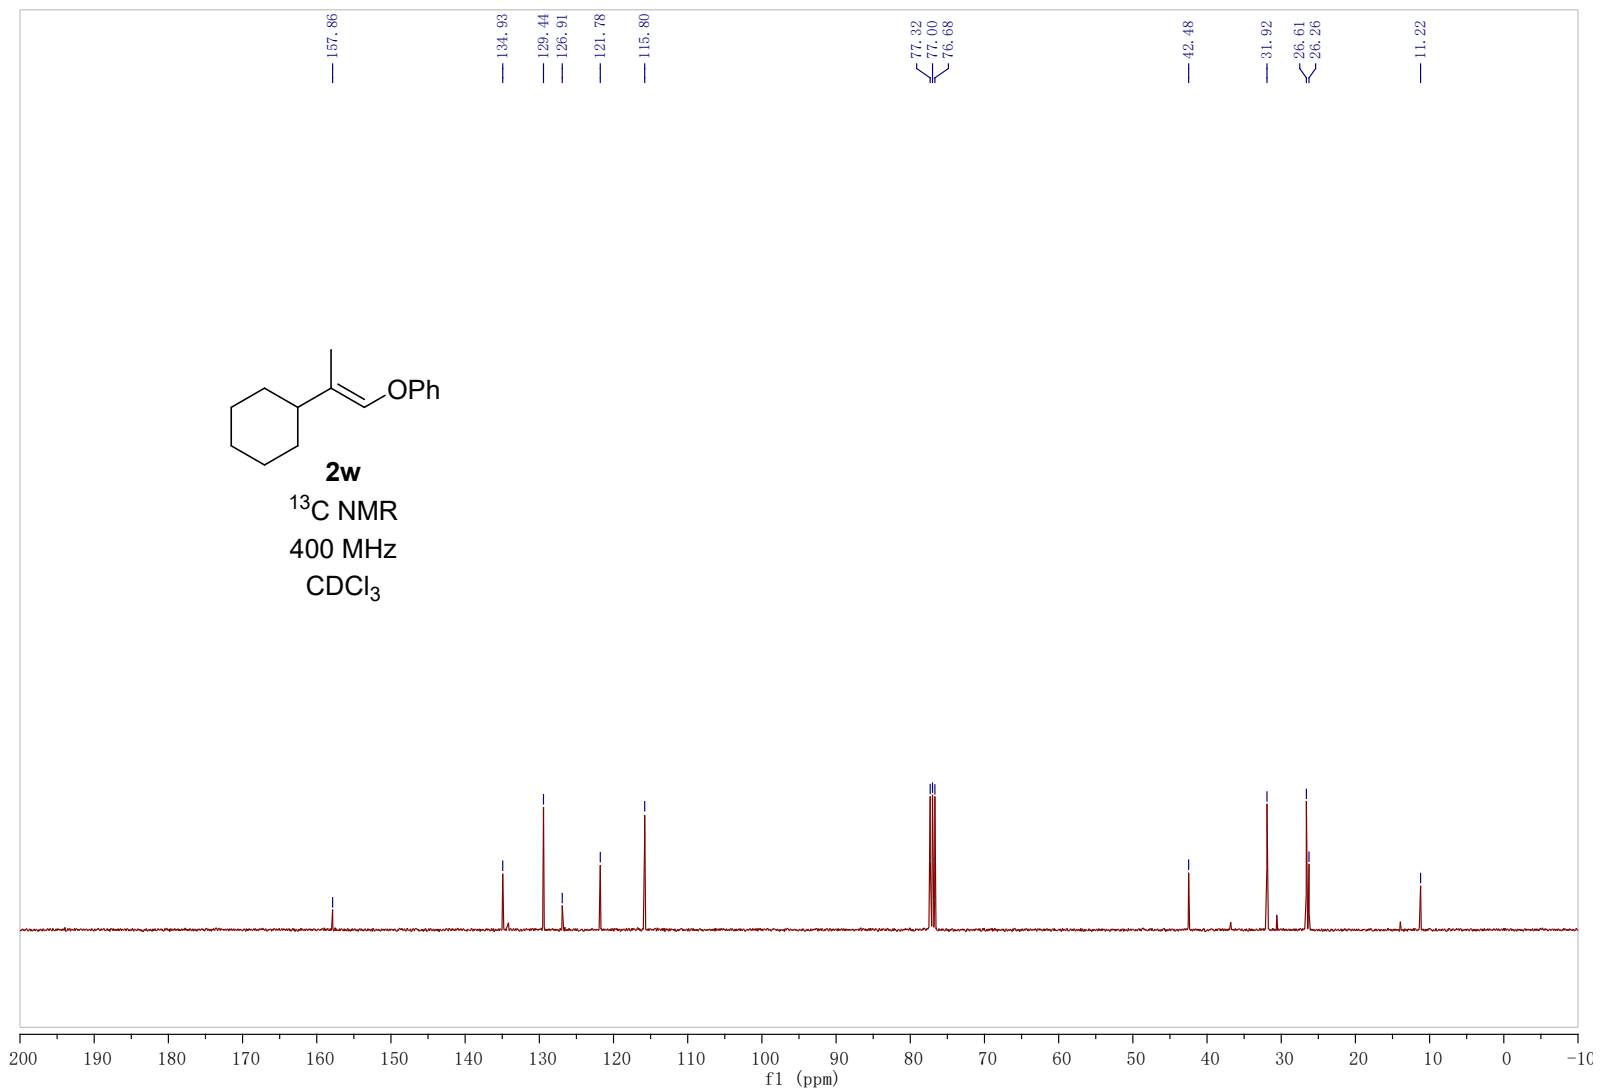

S147

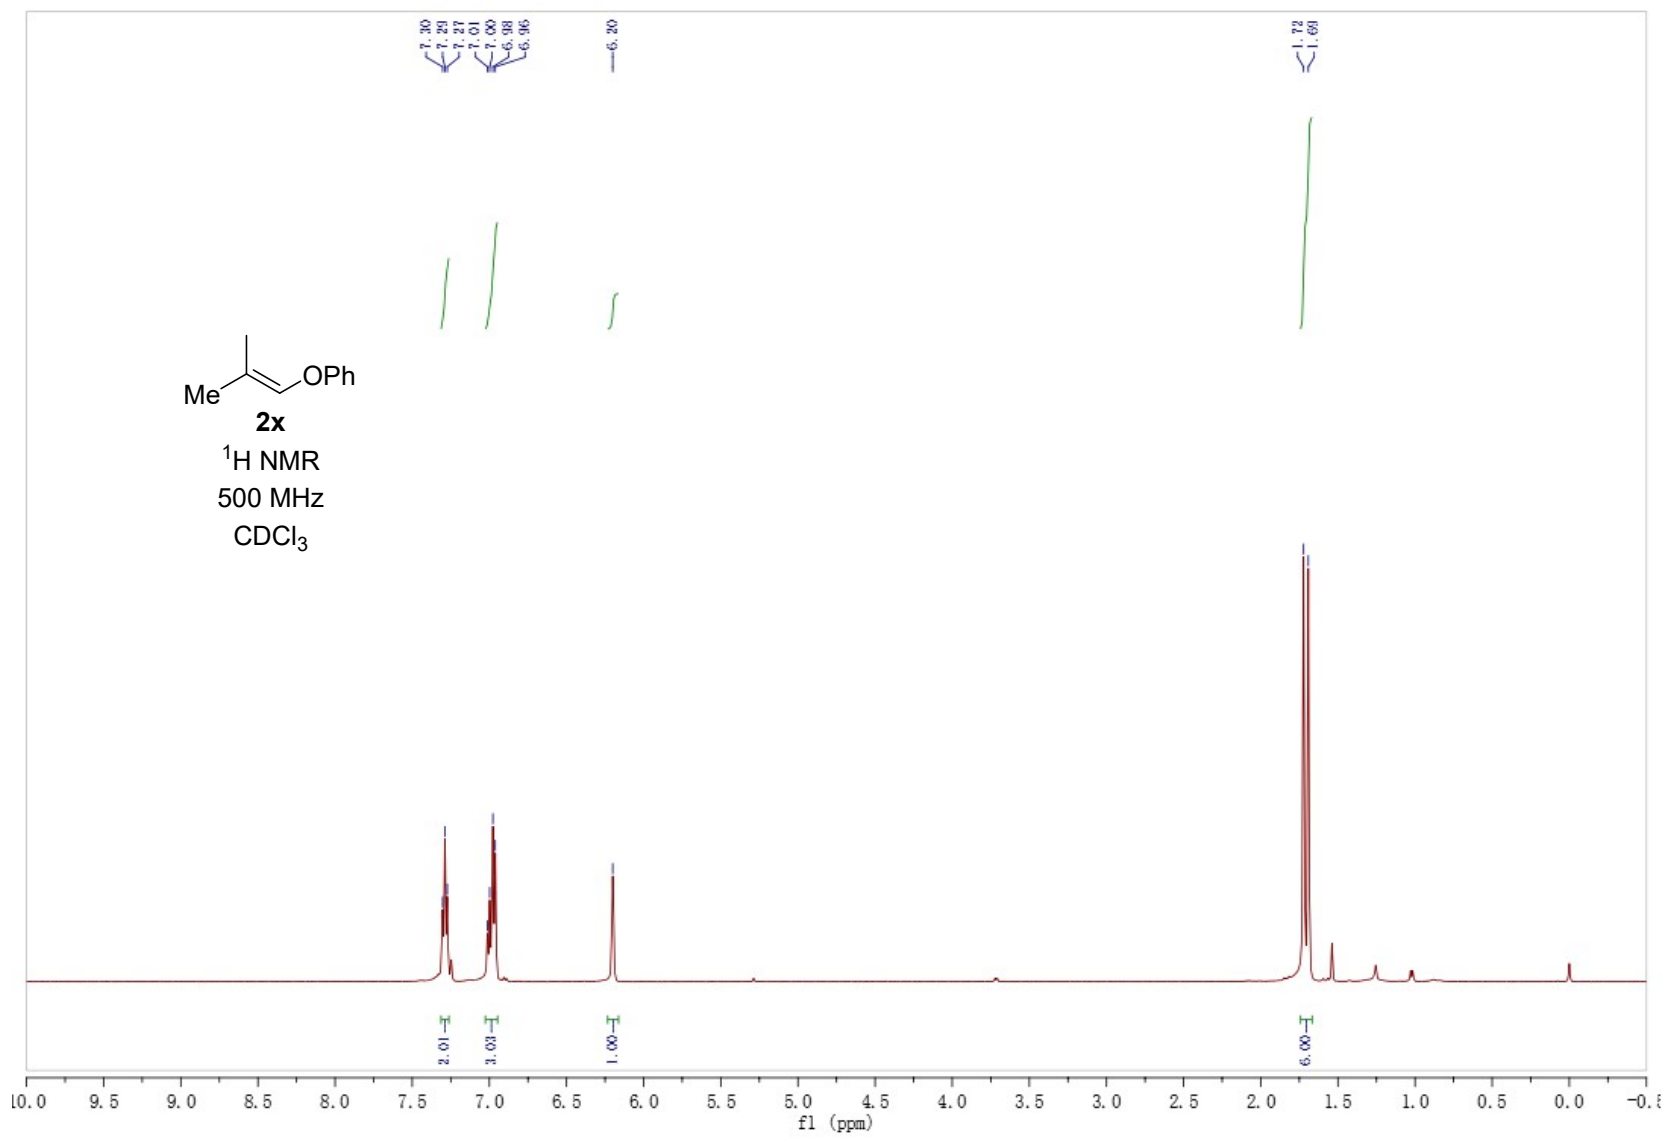

S148

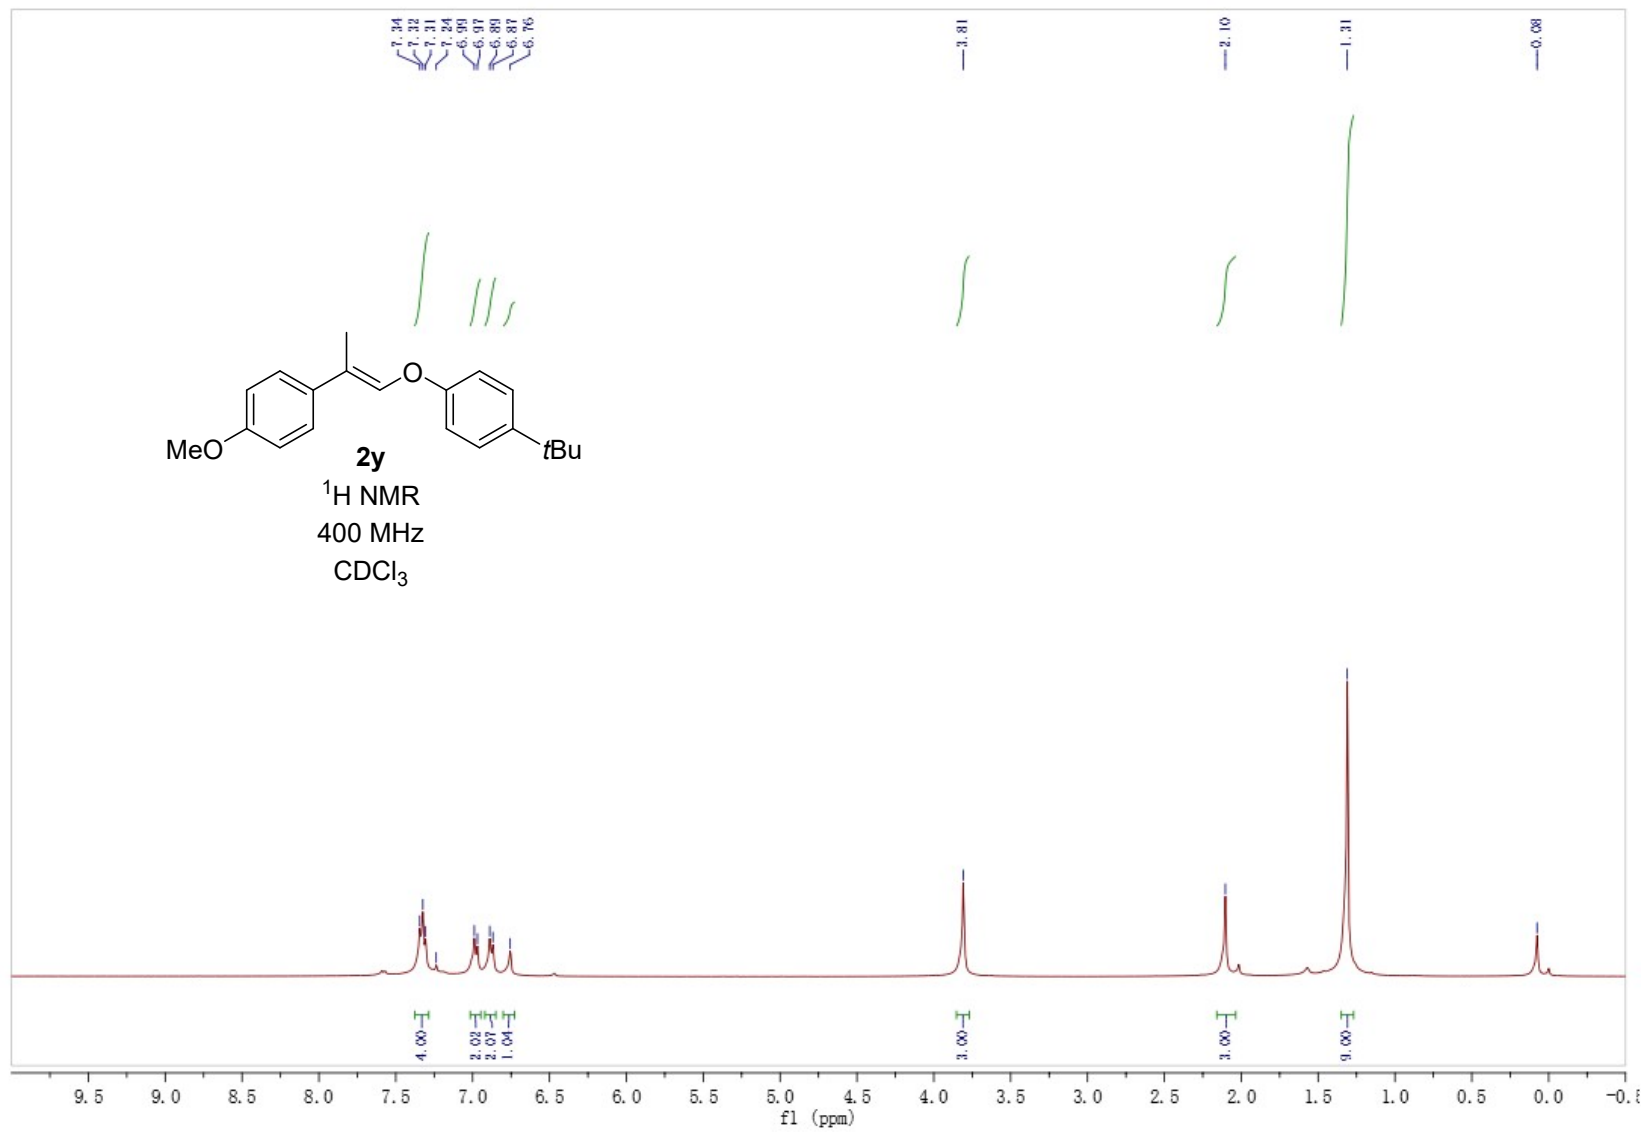

S149

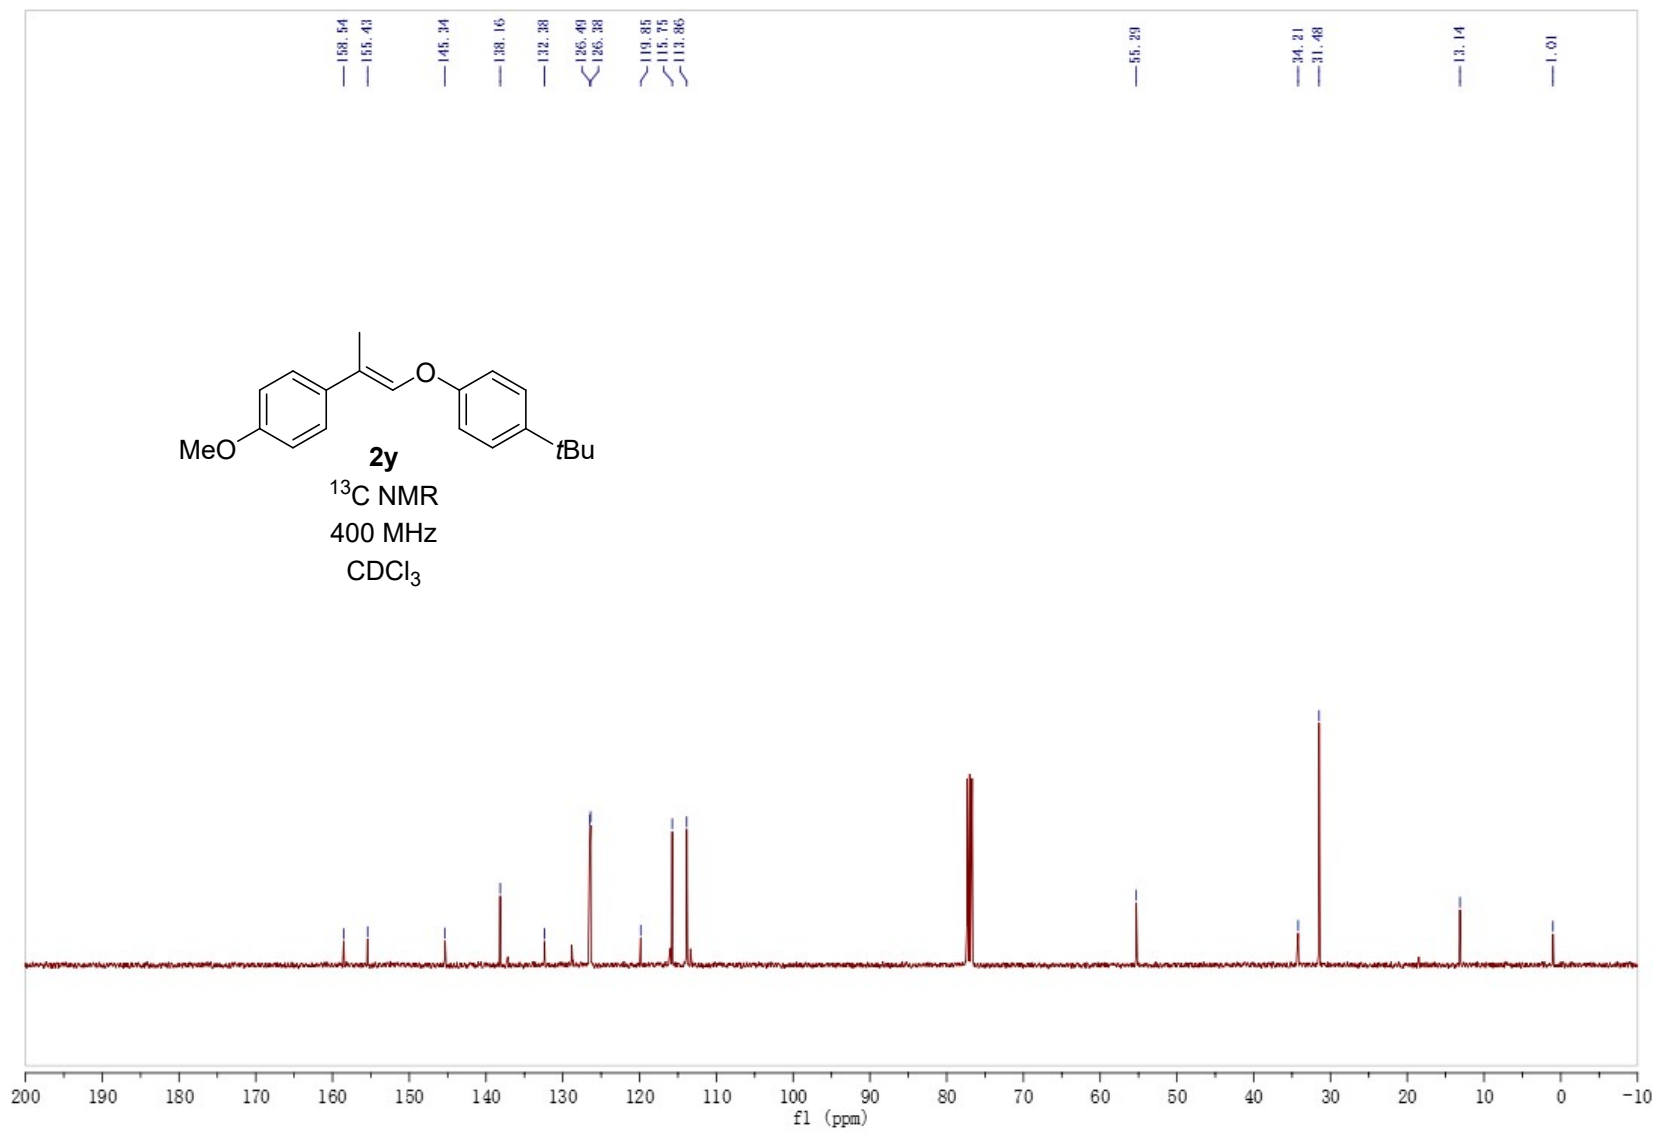

S150

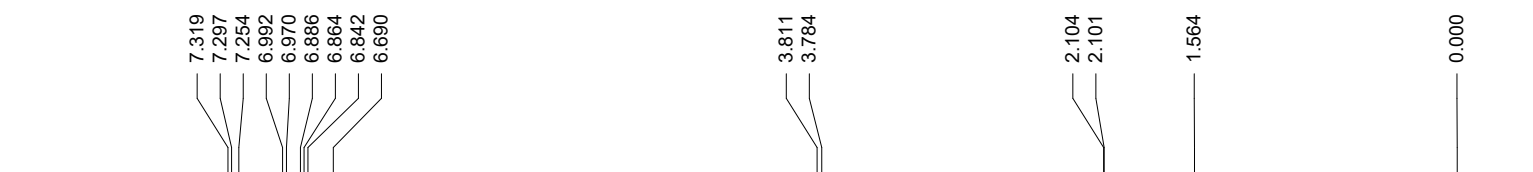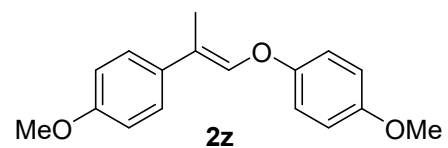

<sup>1</sup>H NMR  
 400 MHz  
 CDCl<sub>3</sub>

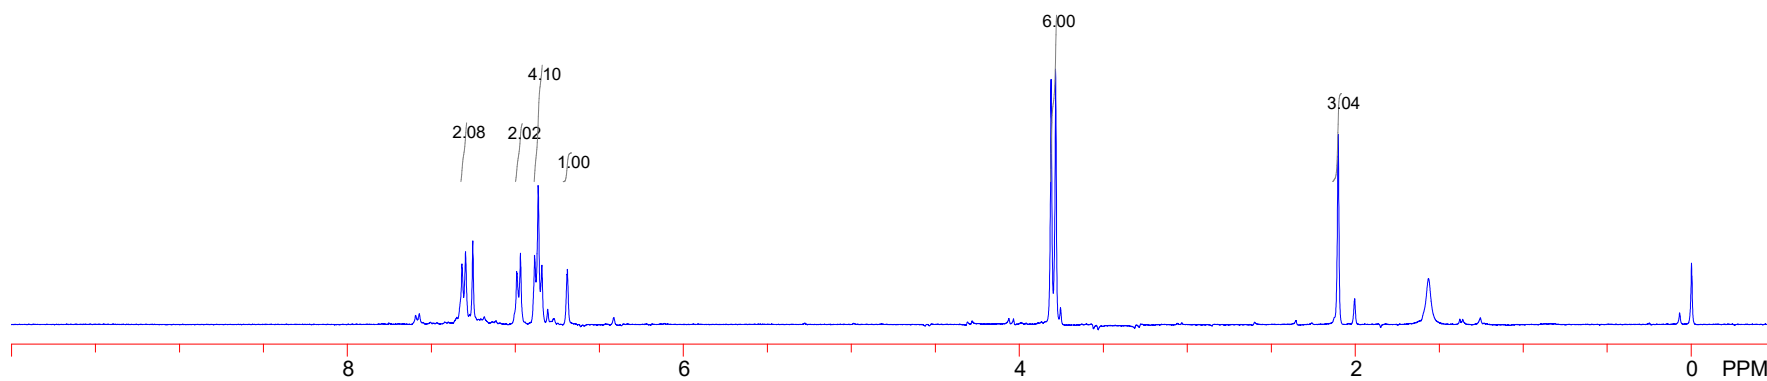

S151

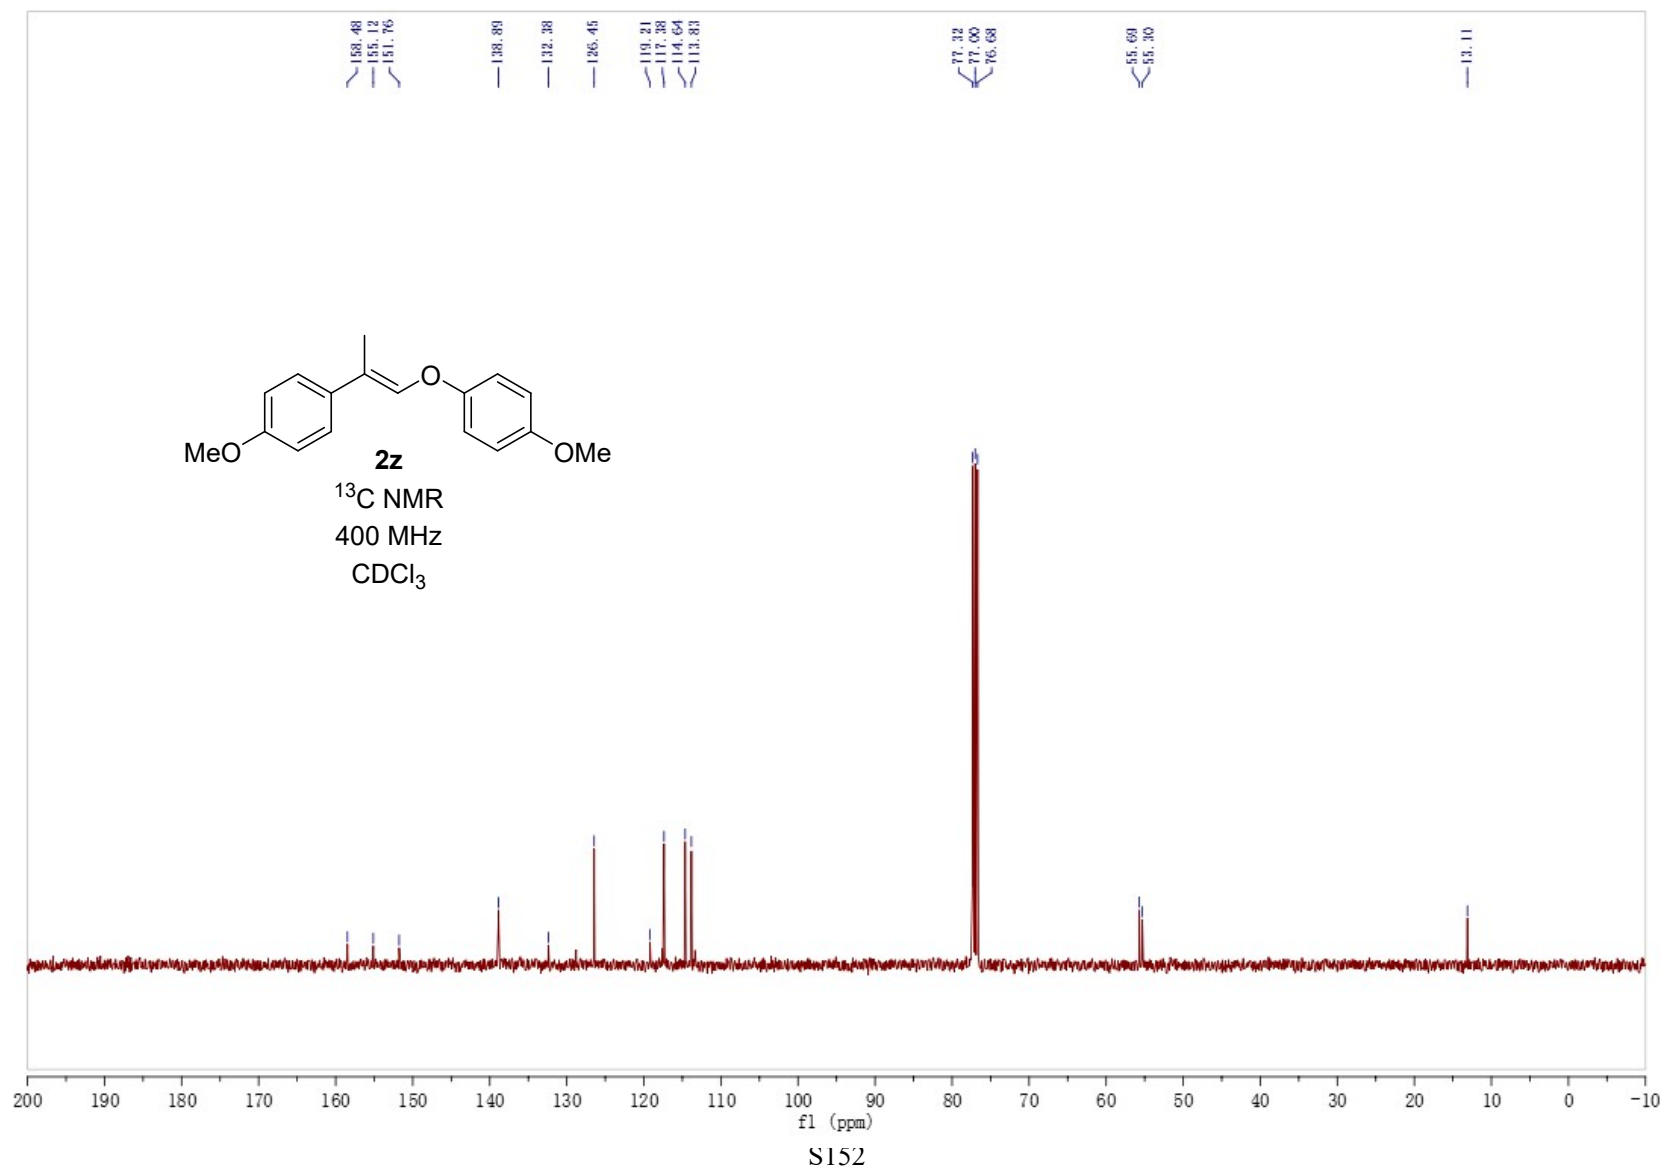



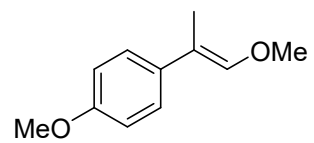

**2aa**

<sup>1</sup>H NMR  
500 MHz  
CDCl<sub>3</sub>

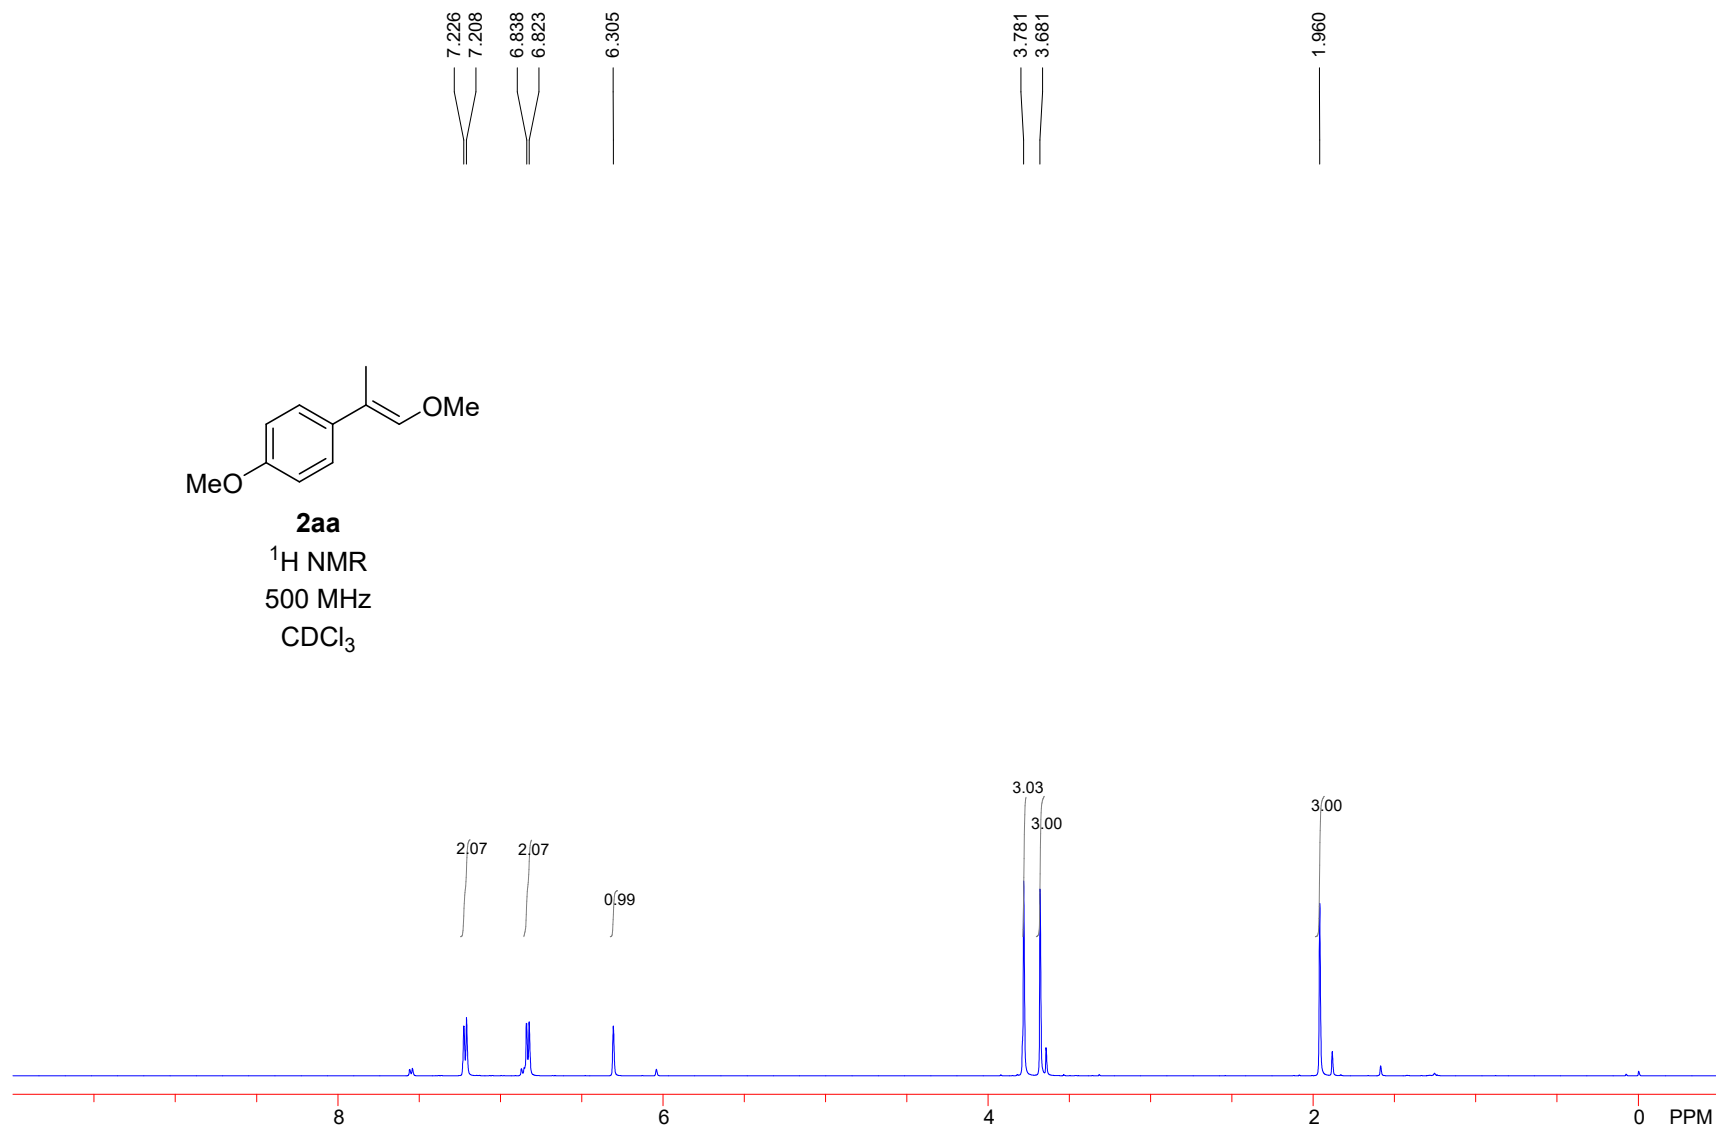

S153



**2aa**

<sup>13</sup>C NMR

500 MHz

CDCl<sub>3</sub>

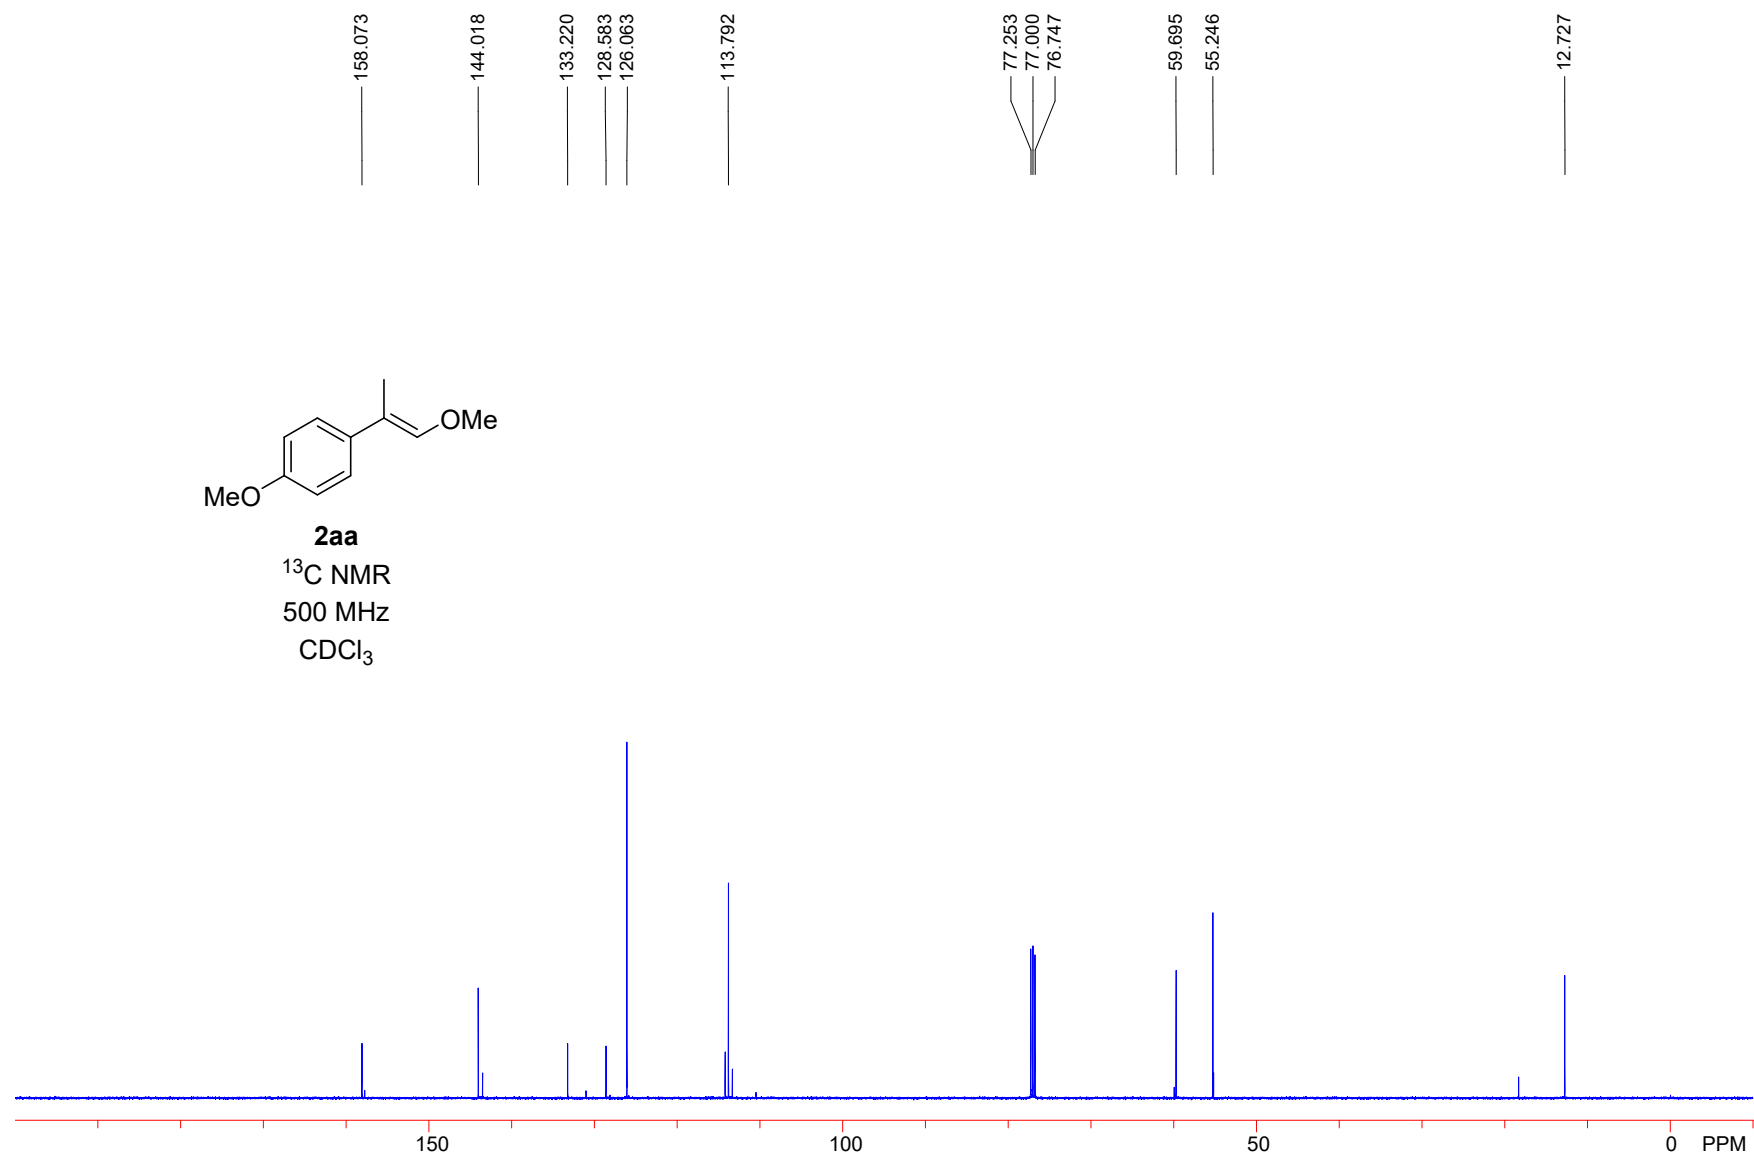

S154

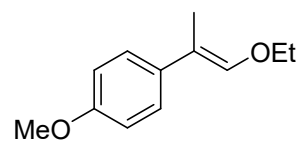

**2ab**

<sup>1</sup>H NMR  
500 MHz  
CDCl<sub>3</sub>

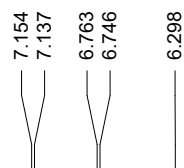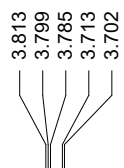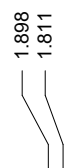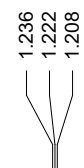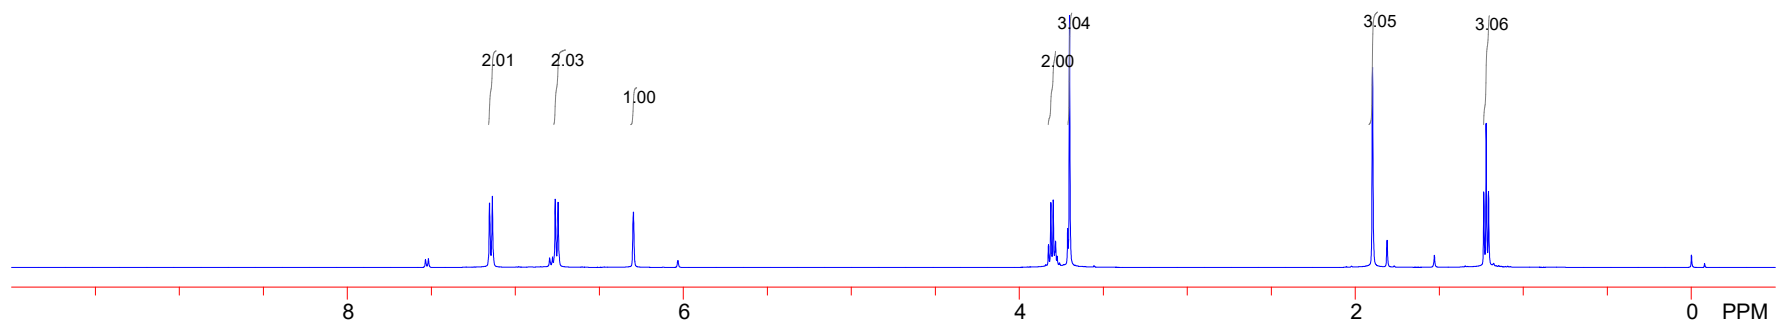

S155

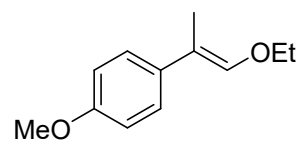

**2ab**

<sup>13</sup>C NMR  
500 MHz  
CDCl<sub>3</sub>

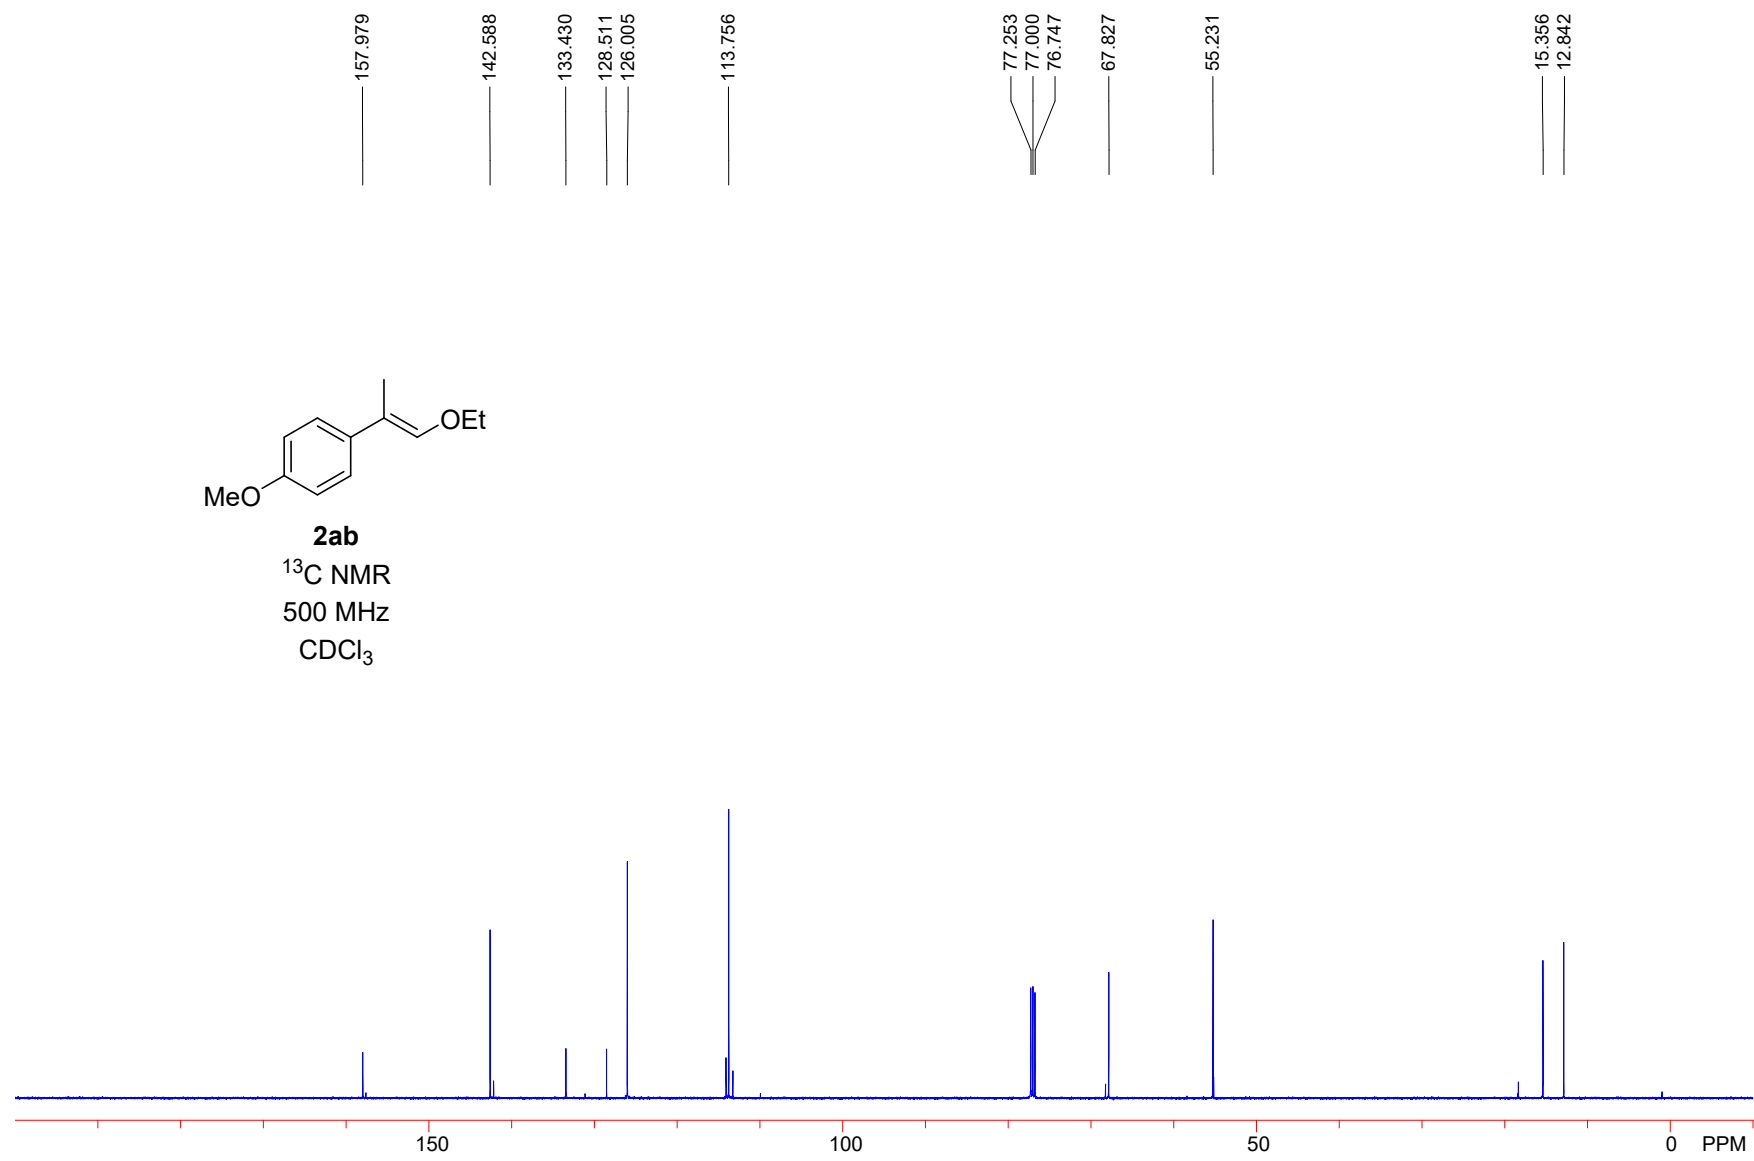

S156

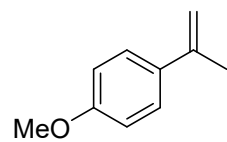

**3a**

<sup>1</sup>H NMR  
400 MHz  
CDCl<sub>3</sub>

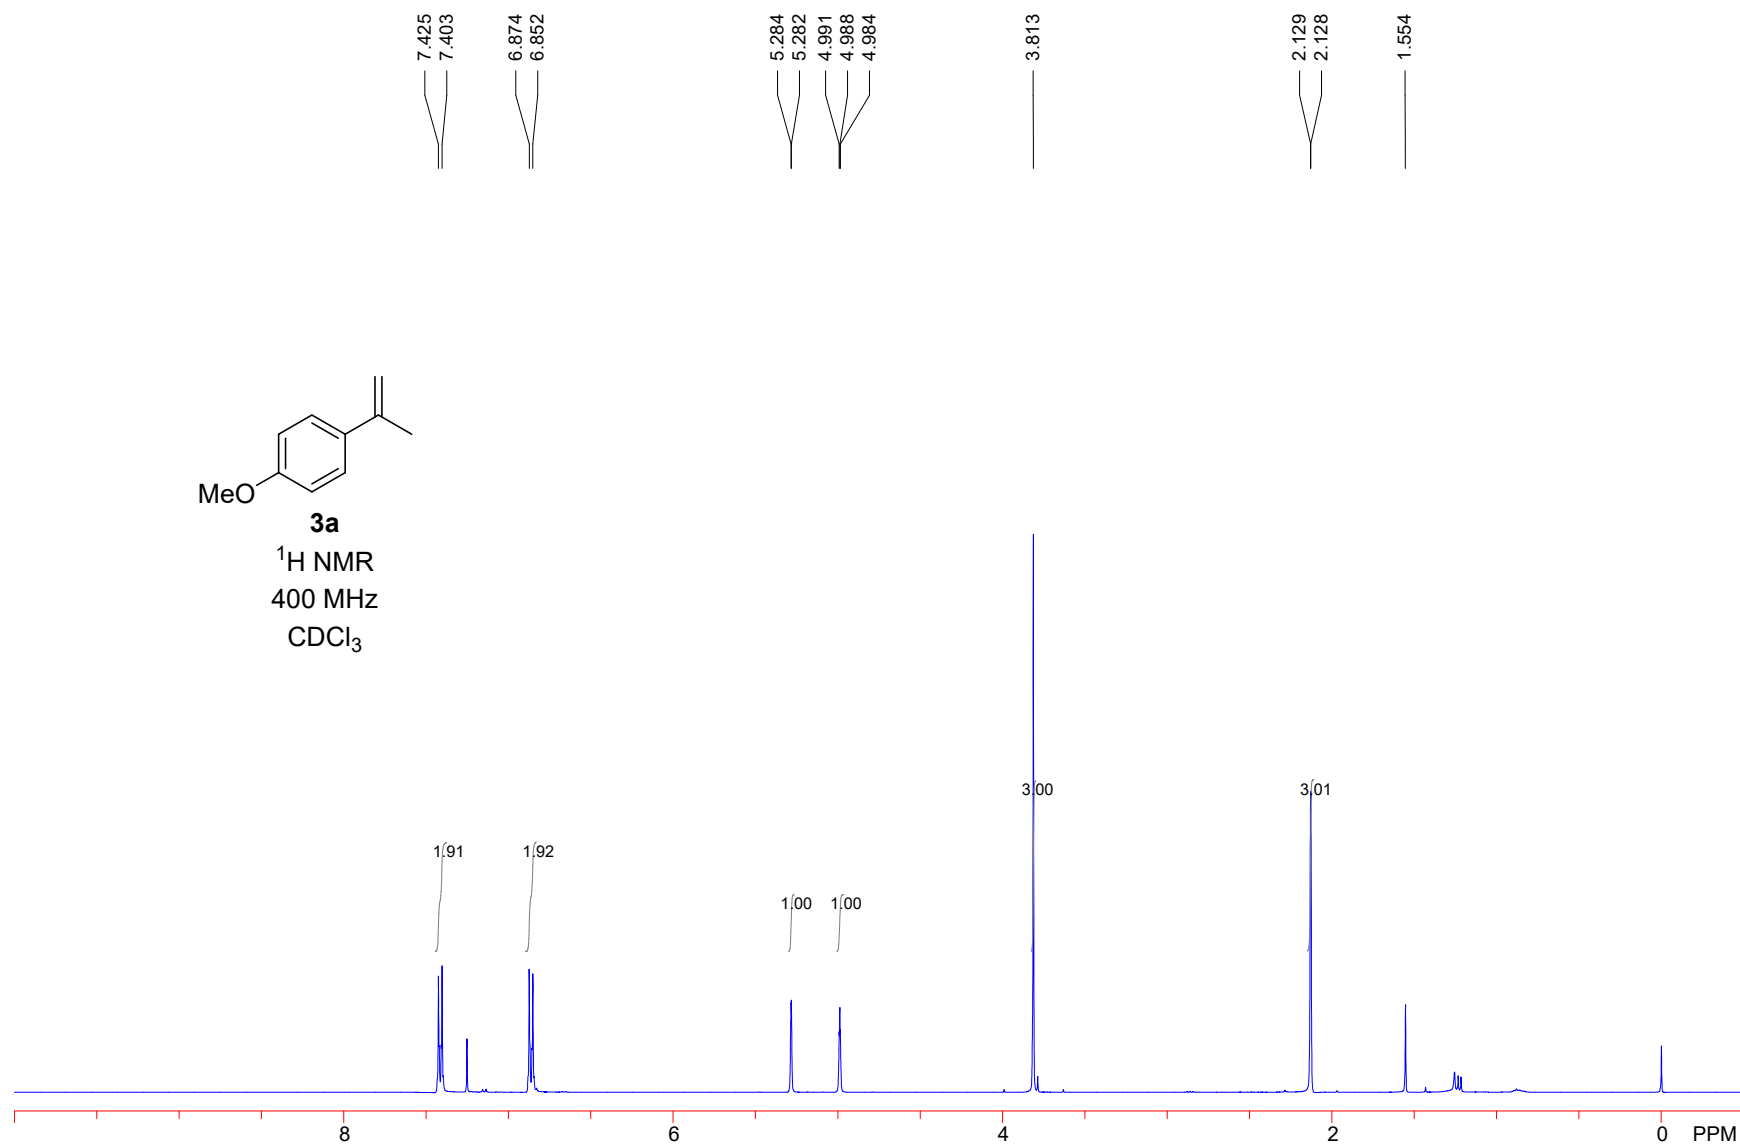

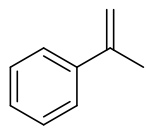

**3b**  
<sup>1</sup>H NMR  
400 MHz  
CDCl<sub>3</sub>

7.550  
7.531  
7.416  
7.398  
7.378  
7.348  
7.330

5.442  
5.157

2.230

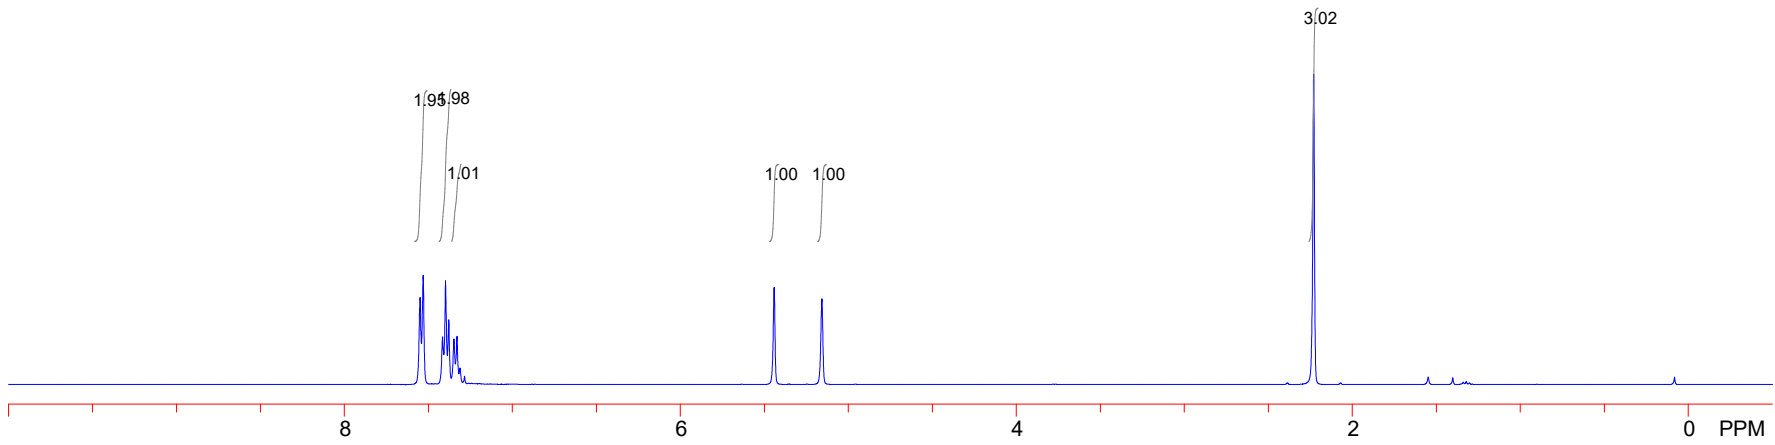

S158

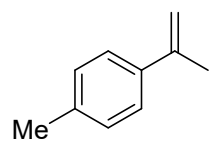

**3c**

<sup>1</sup>H NMR  
400 MHz  
CDCl<sub>3</sub>

7.272  
7.254  
7.244  
7.230  
7.212  
7.087  
7.070

5.340  
5.058  
5.056

2.358  
2.140

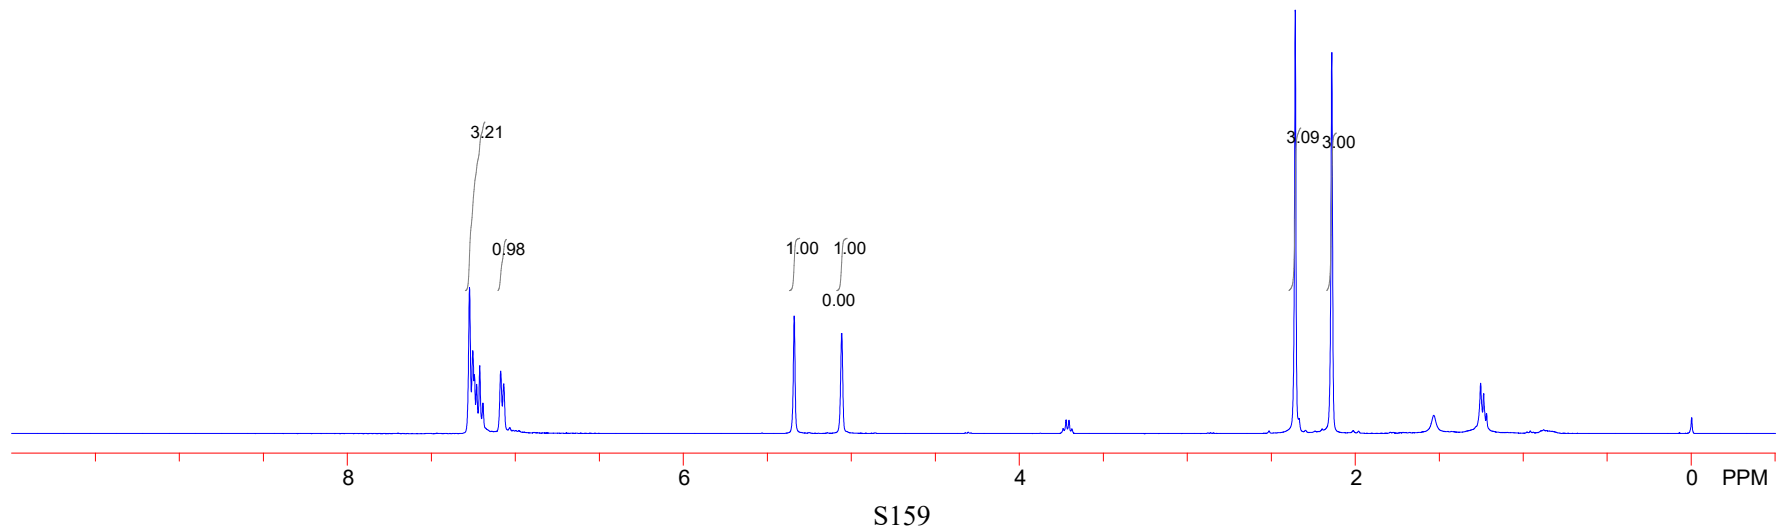

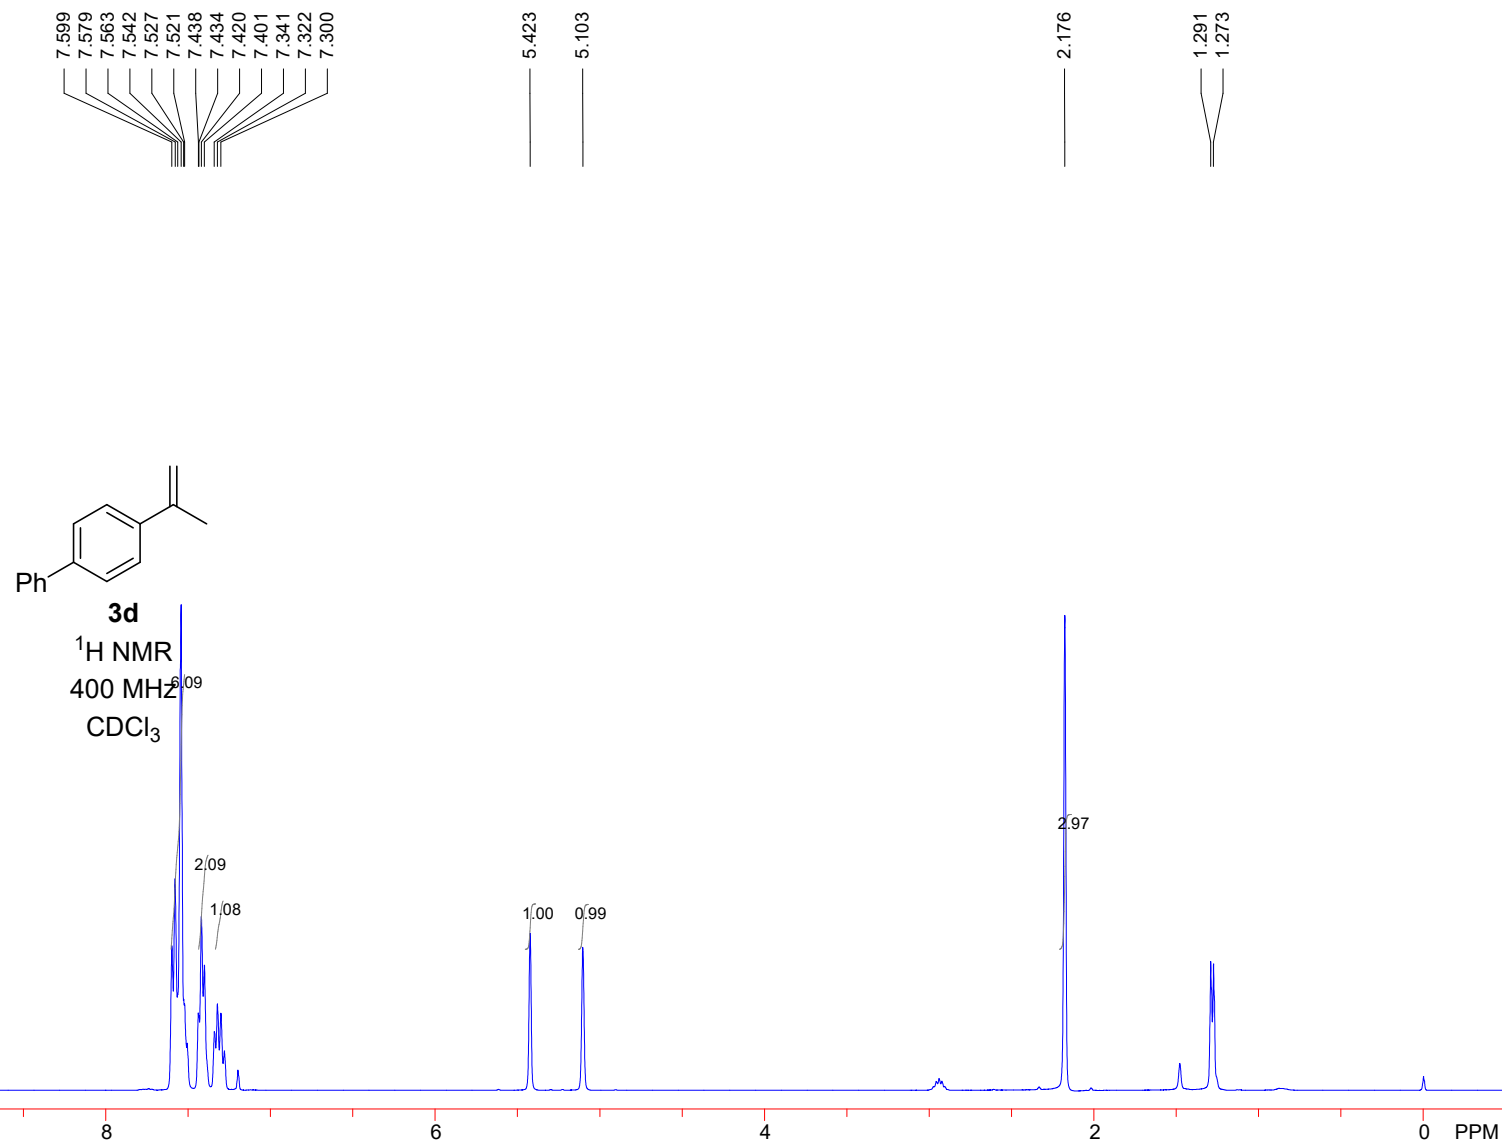

S160



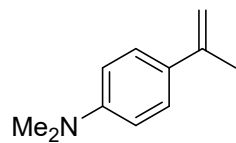

**3e**

<sup>1</sup>H NMR  
400 MHz  
CDCl<sub>3</sub>

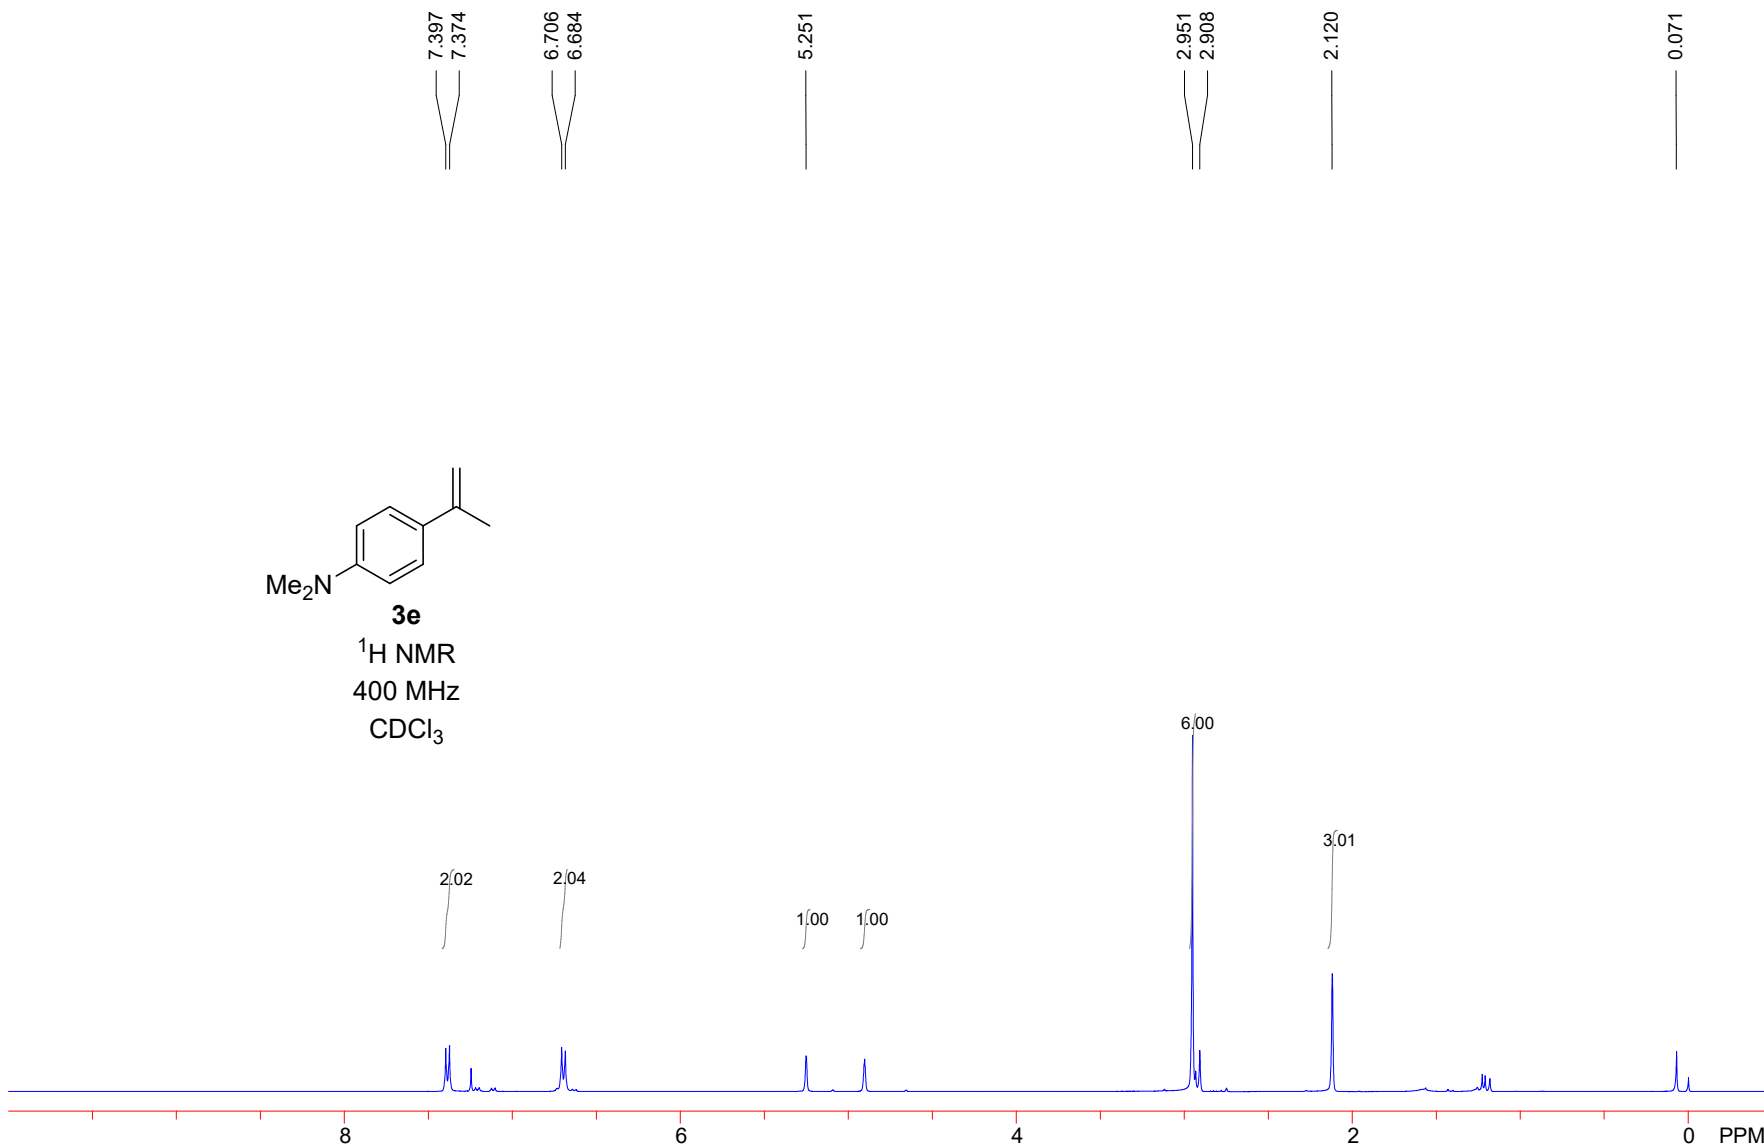

S161

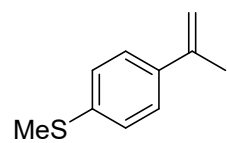

**3f**

<sup>1</sup>H NMR  
400 MHz  
CDCl<sub>3</sub>

7.408  
7.387  
7.258  
7.229  
7.208

5.352  
5.052

2.488  
2.132  
1.546

-0.000

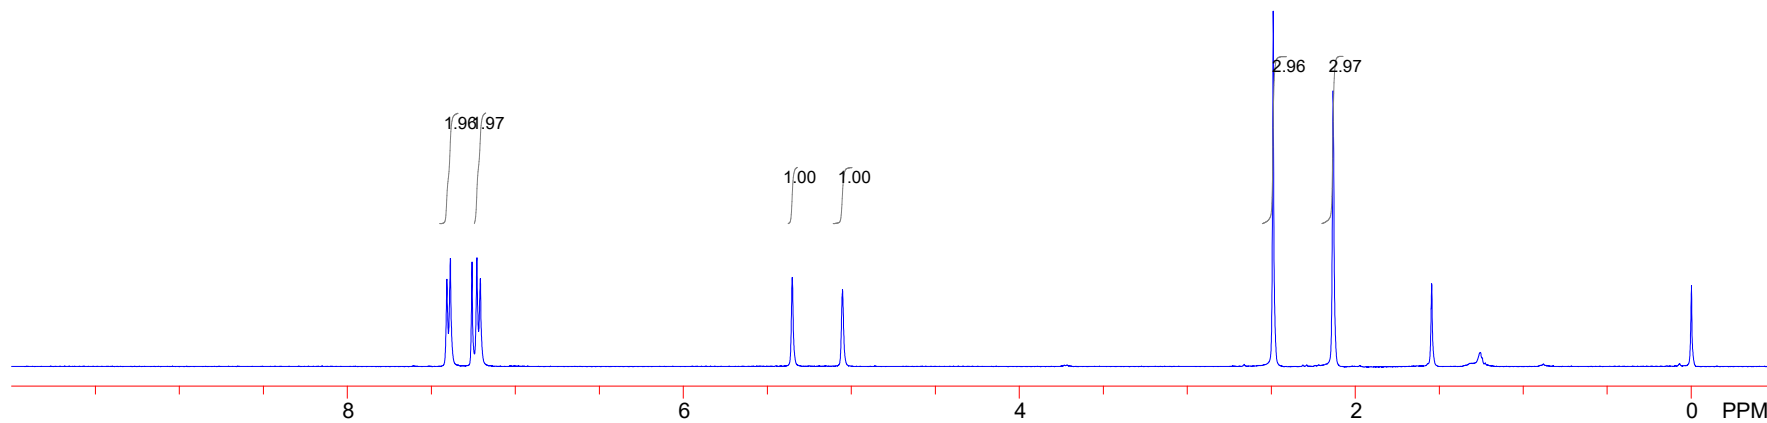

S162

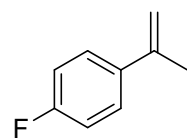

**3g**

<sup>1</sup>H NMR  
400 MHz  
CDCl<sub>3</sub>

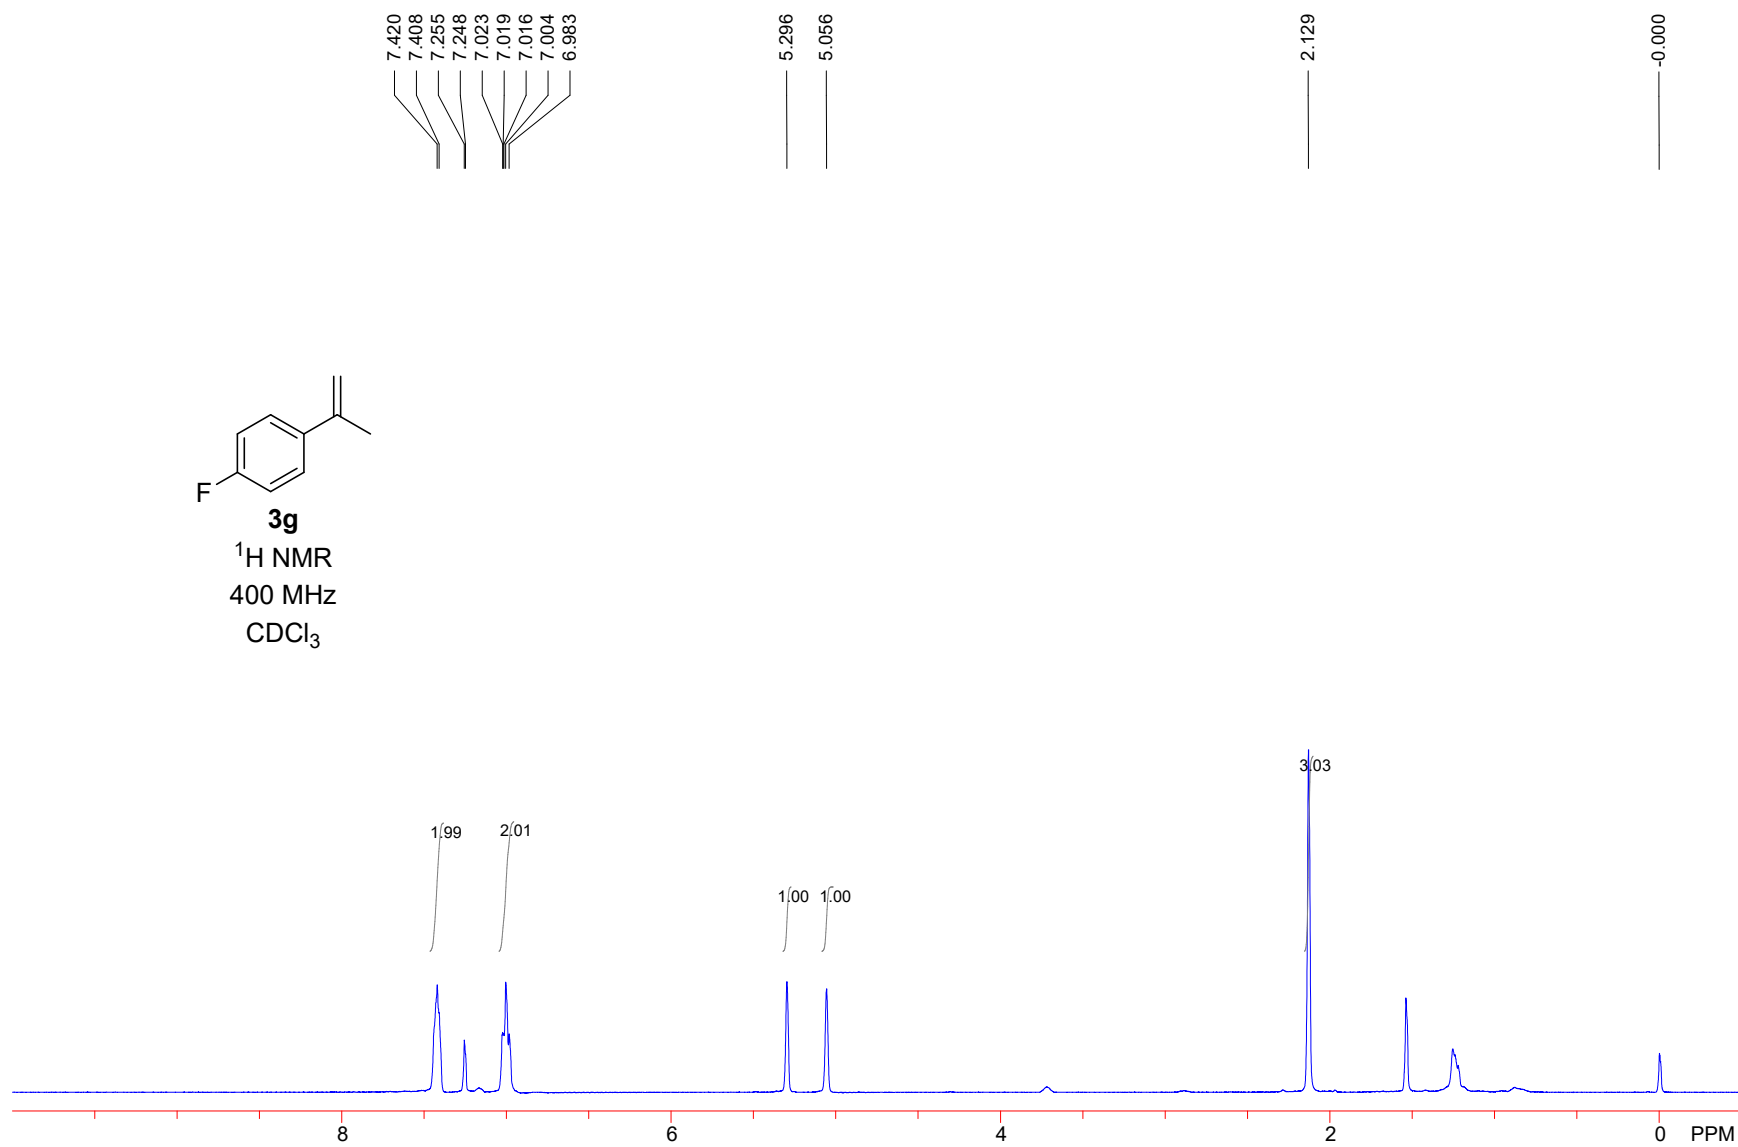

S163

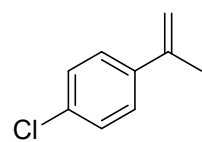

**3h**

<sup>1</sup>H NMR  
400 MHz  
CDCl<sub>3</sub>

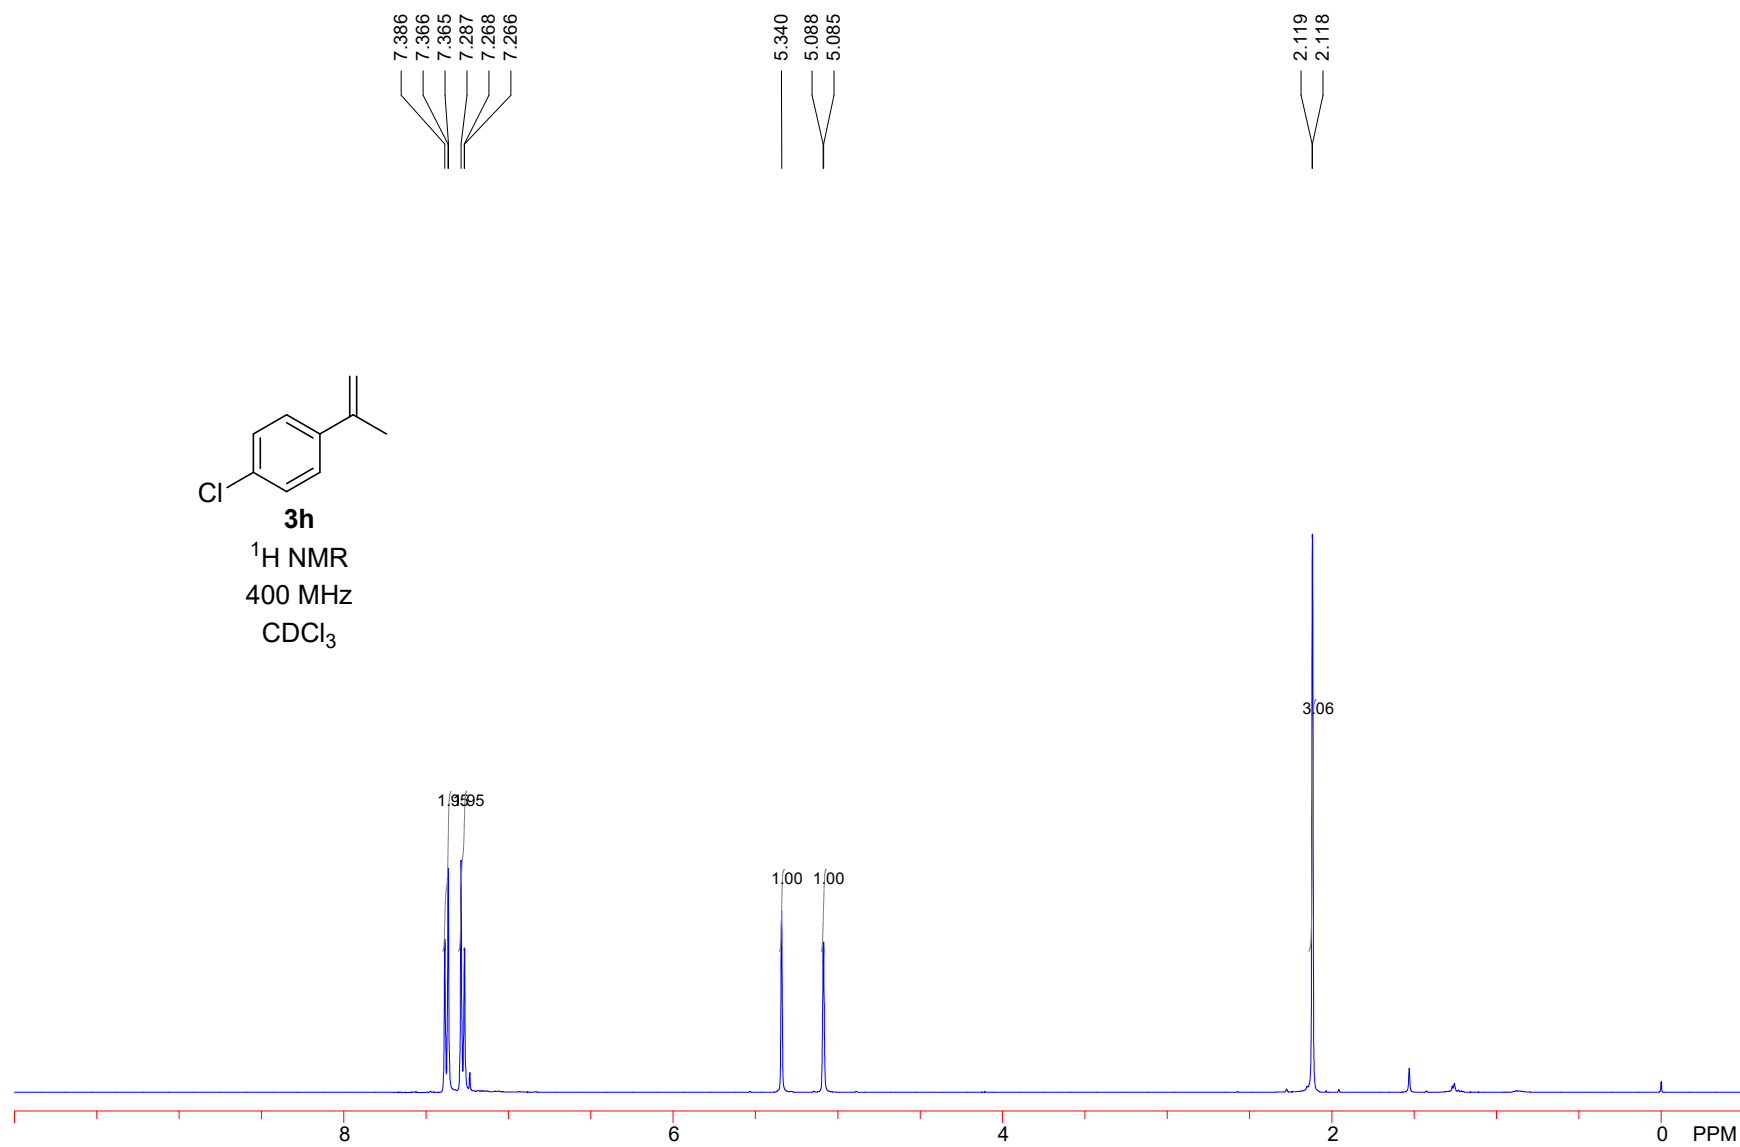

S164

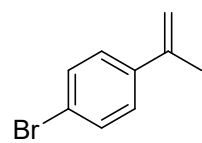

**3i**

<sup>1</sup>H NMR  
400 MHz  
CDCl<sub>3</sub>

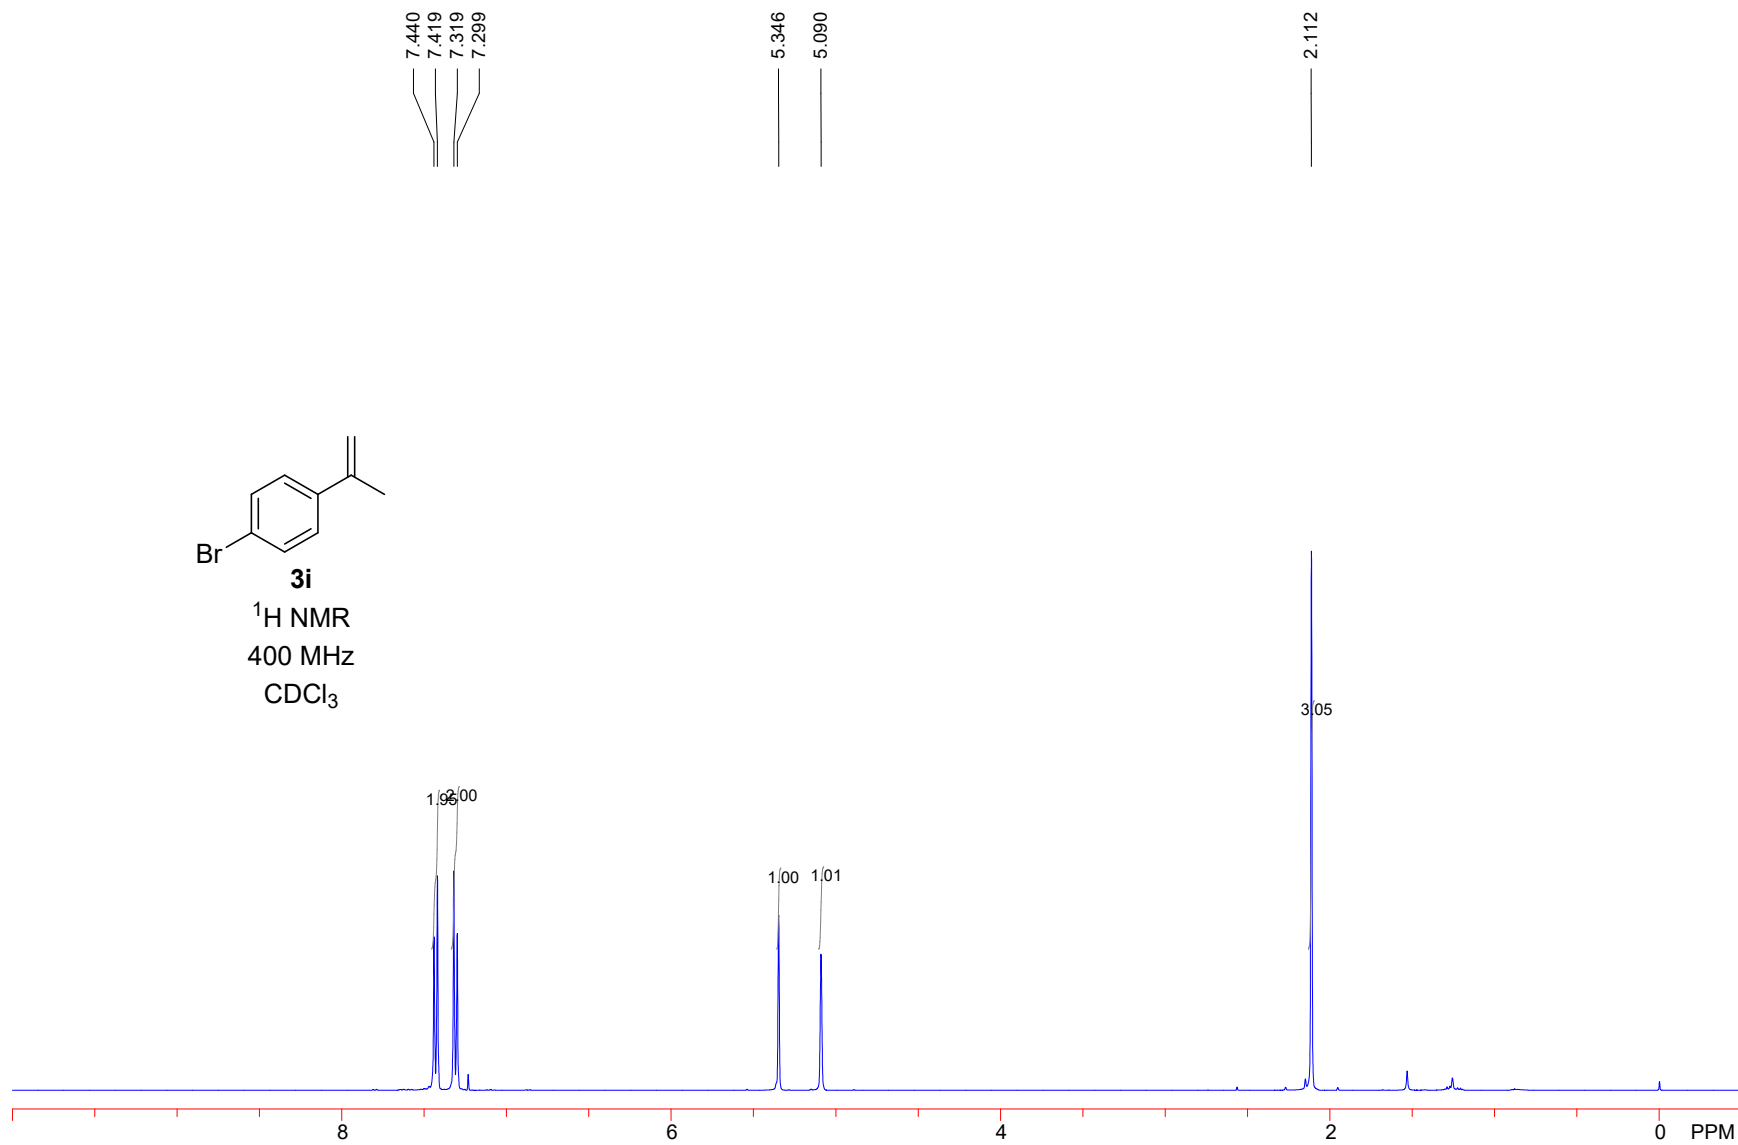

S165

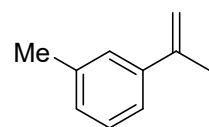

**3j**

<sup>1</sup>H NMR  
400 MHz  
CDCl<sub>3</sub>

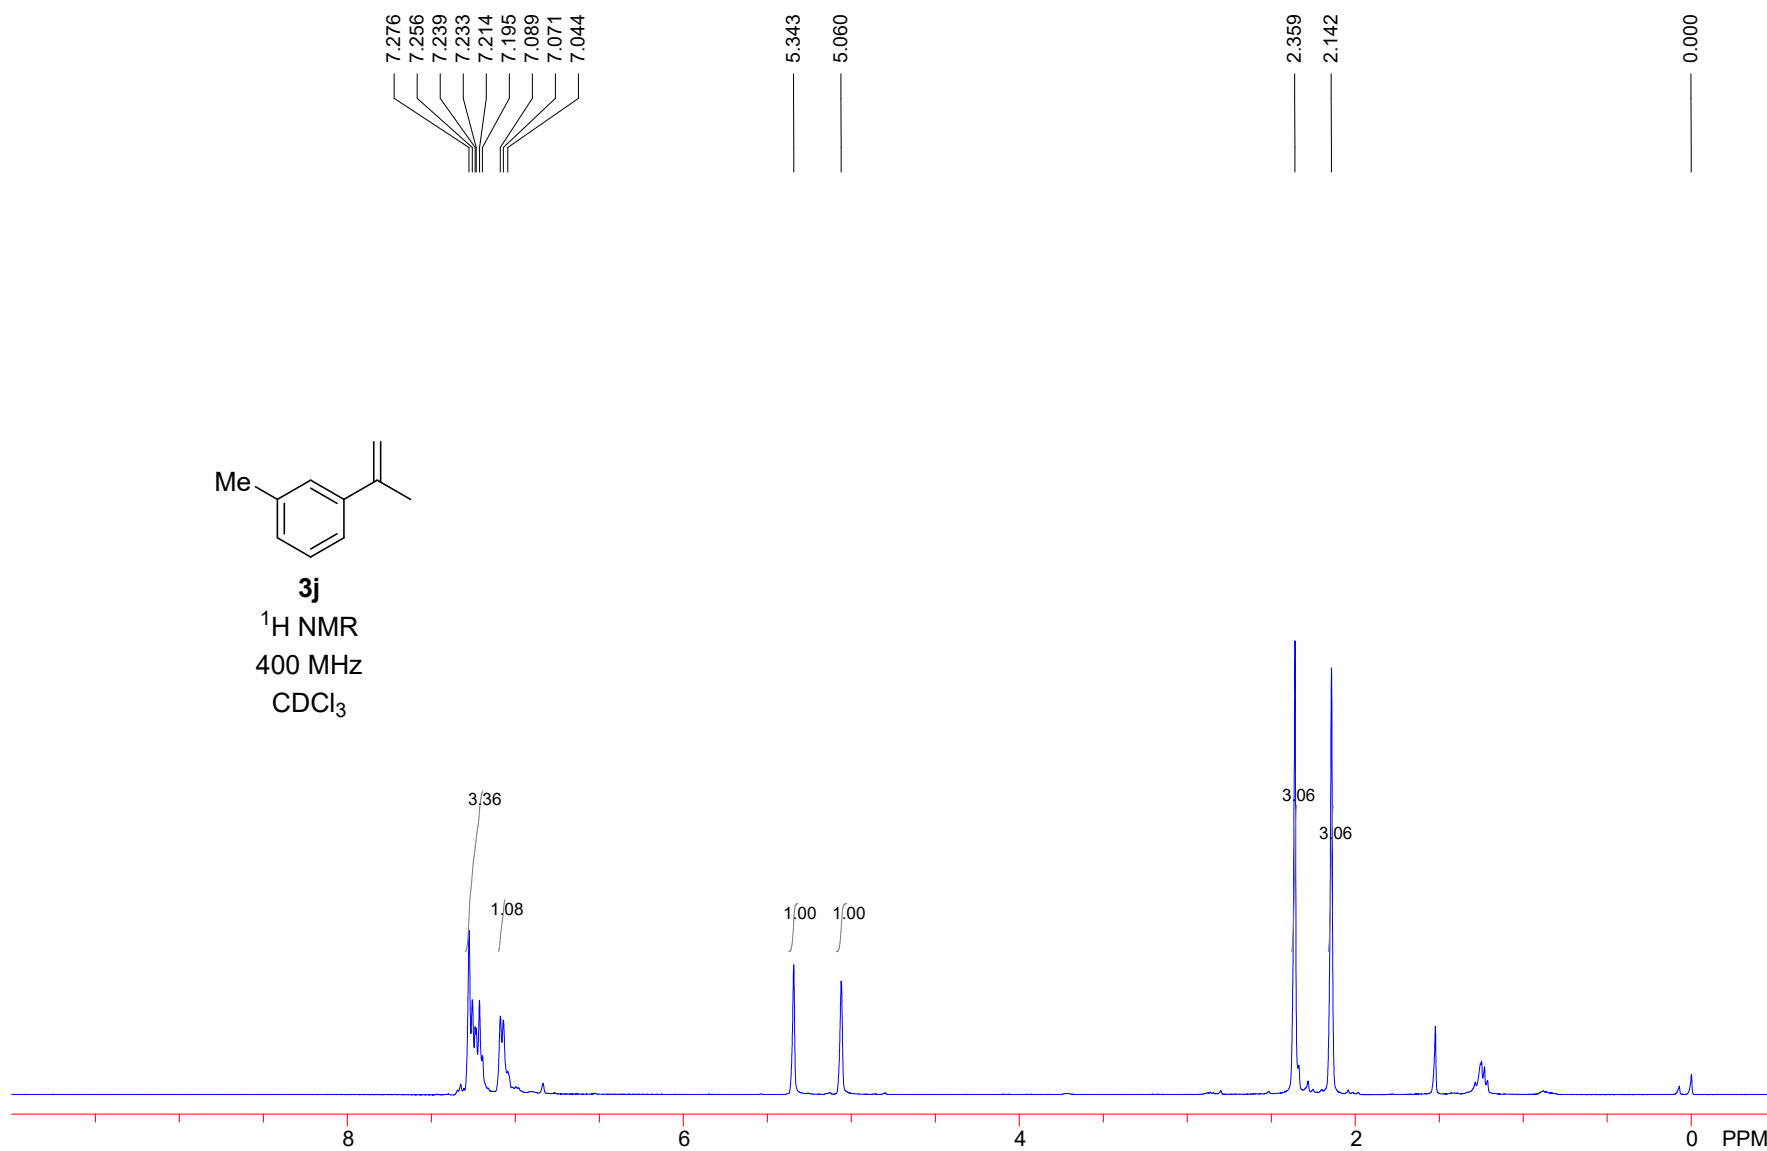

S166

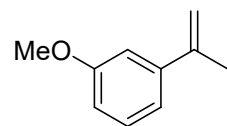

**3k**

<sup>1</sup>H NMR  
400 MHz  
CDCl<sub>3</sub>

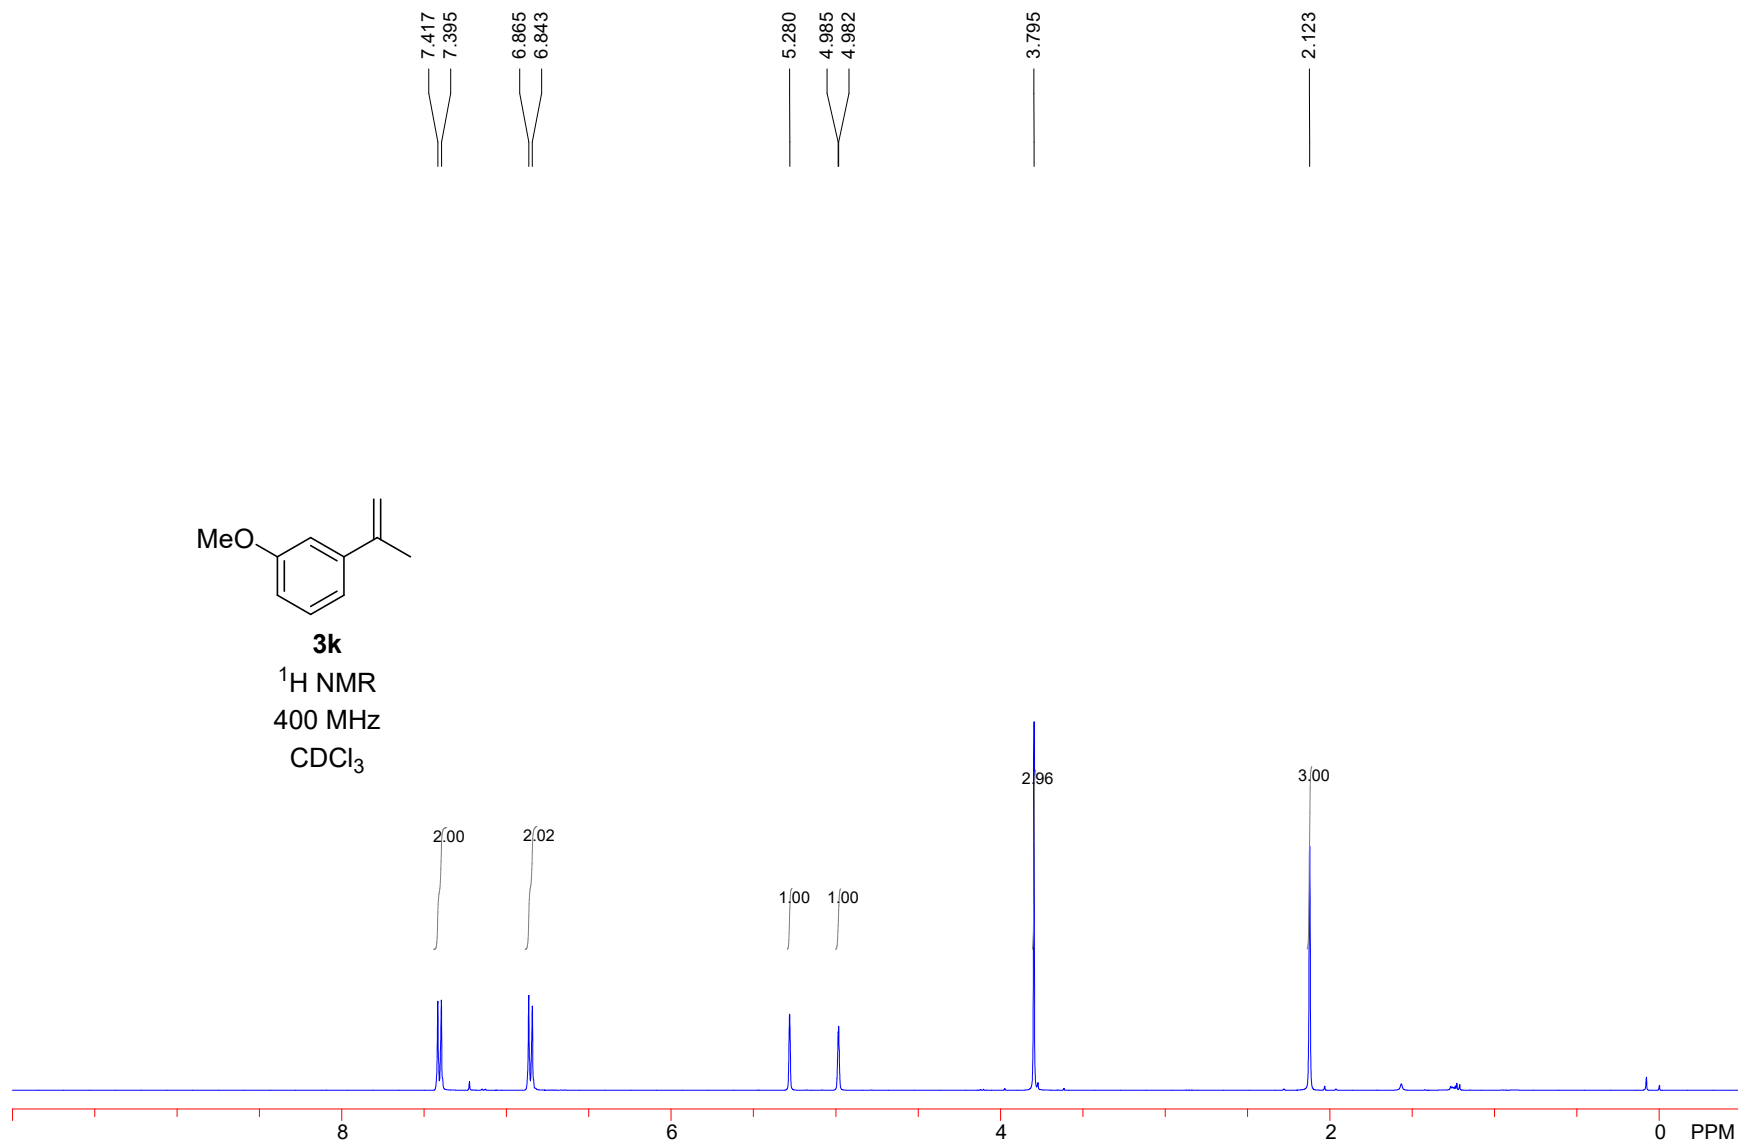

S167

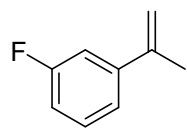

**3I**

<sup>1</sup>H NMR  
400 MHz  
CDCl<sub>3</sub>

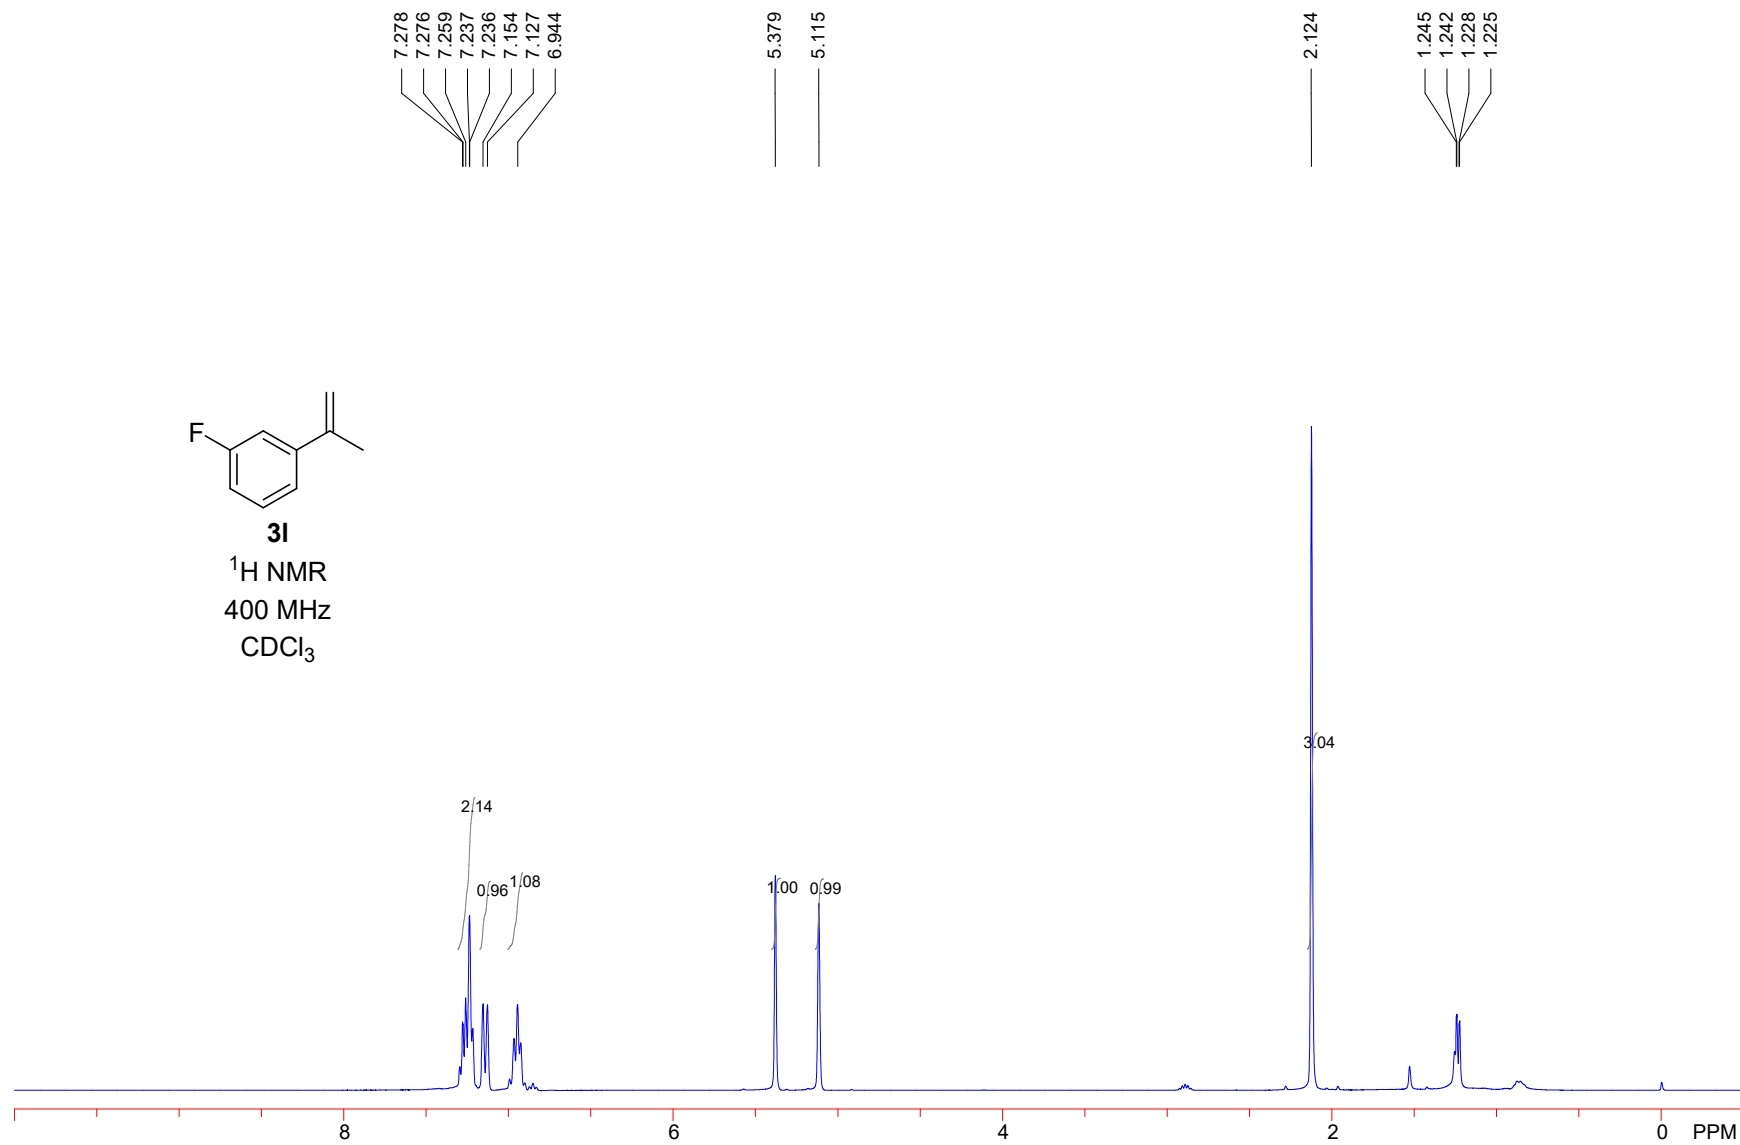

S168



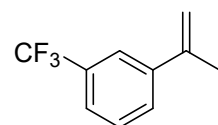

**3m**

<sup>1</sup>H NMR  
400 MHz  
CDCl<sub>3</sub>

7.687  
7.639  
7.620  
7.526  
7.507  
7.458  
7.438  
7.257

5.419  
5.178

2.173

-0.001

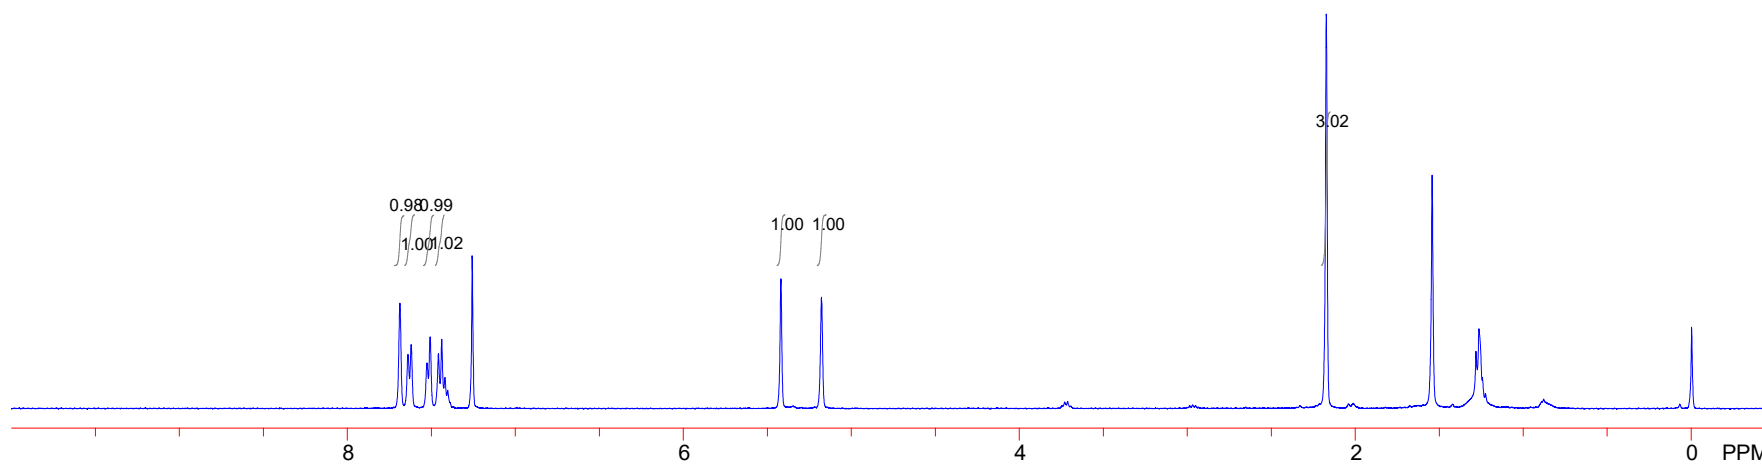

S169

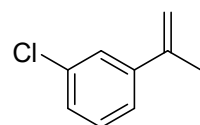

**3n**

<sup>1</sup>H NMR  
400 MHz  
CDCl<sub>3</sub>

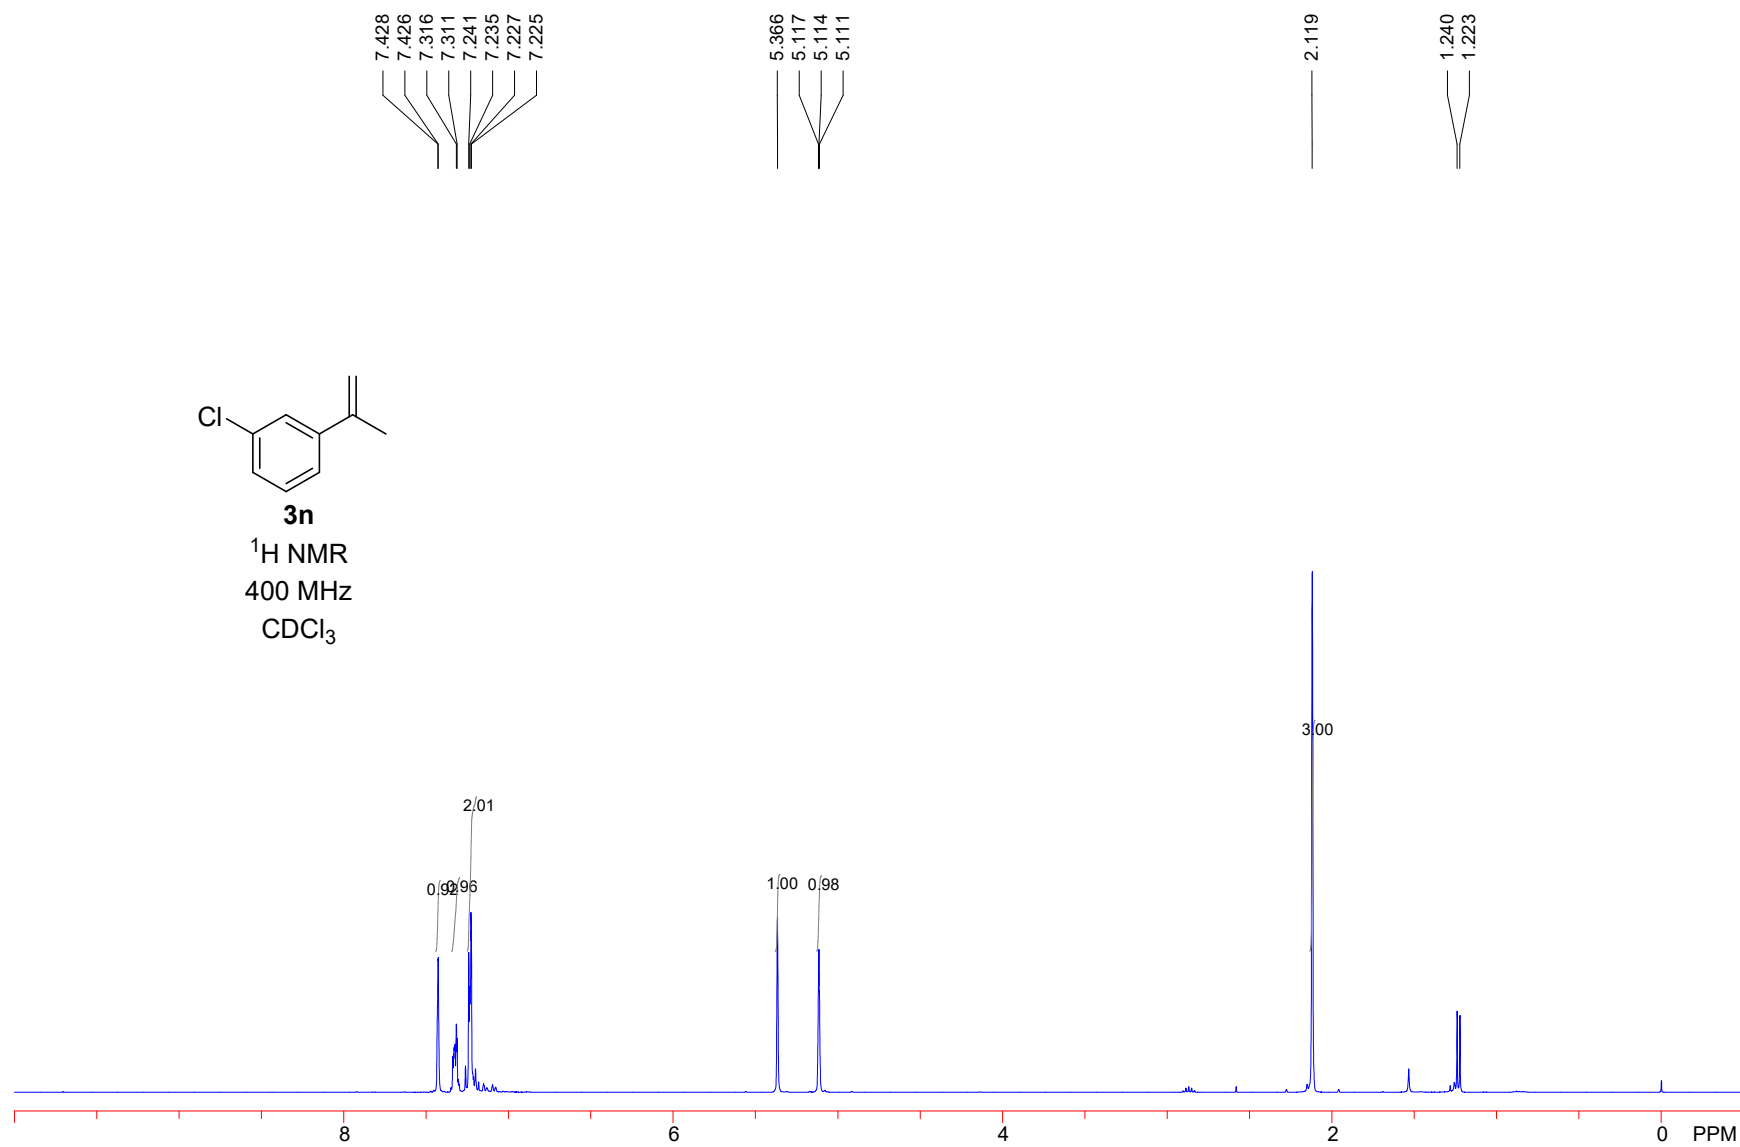

S170

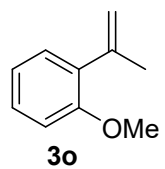

<sup>1</sup>H NMR  
400 MHz  
CDCl<sub>3</sub>

7.246  
7.238  
7.195  
7.176  
6.914  
6.893  
6.887  
6.867

5.145  
5.055

3.831

2.117

1.536

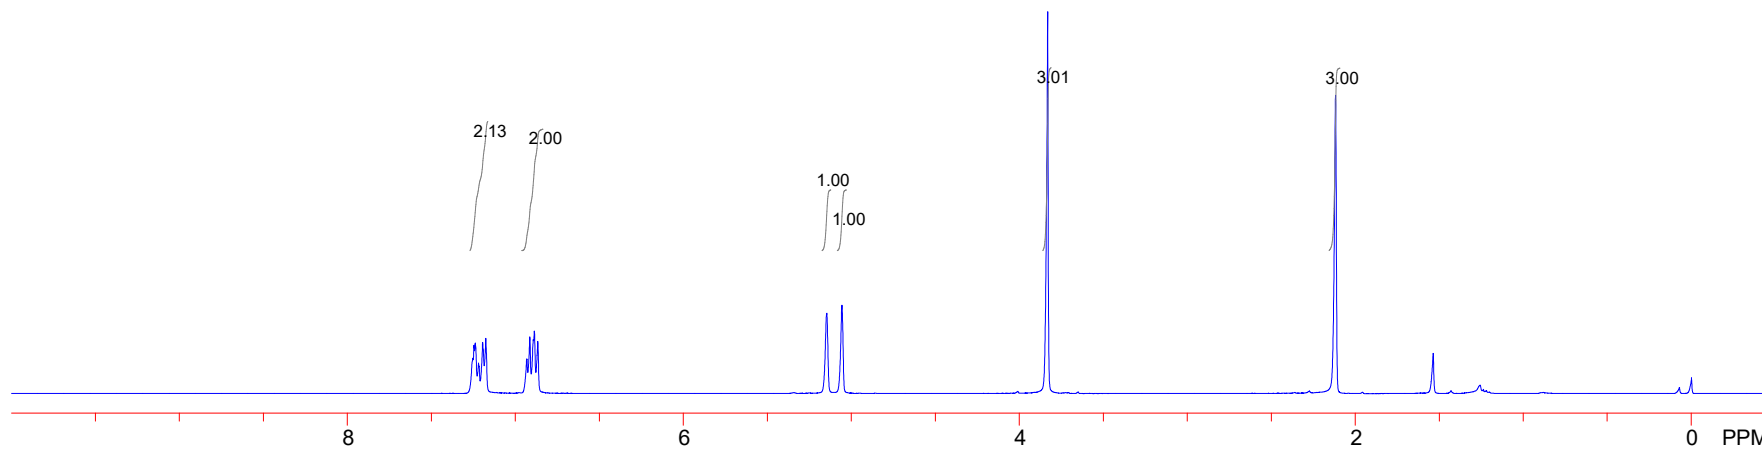

S171

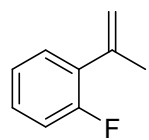

**3p**

<sup>1</sup>H NMR  
400 MHz  
CDCl<sub>3</sub>

7.441  
7.427  
7.419  
7.405  
7.254  
7.025  
7.003  
6.981

5.298  
5.058

2.131

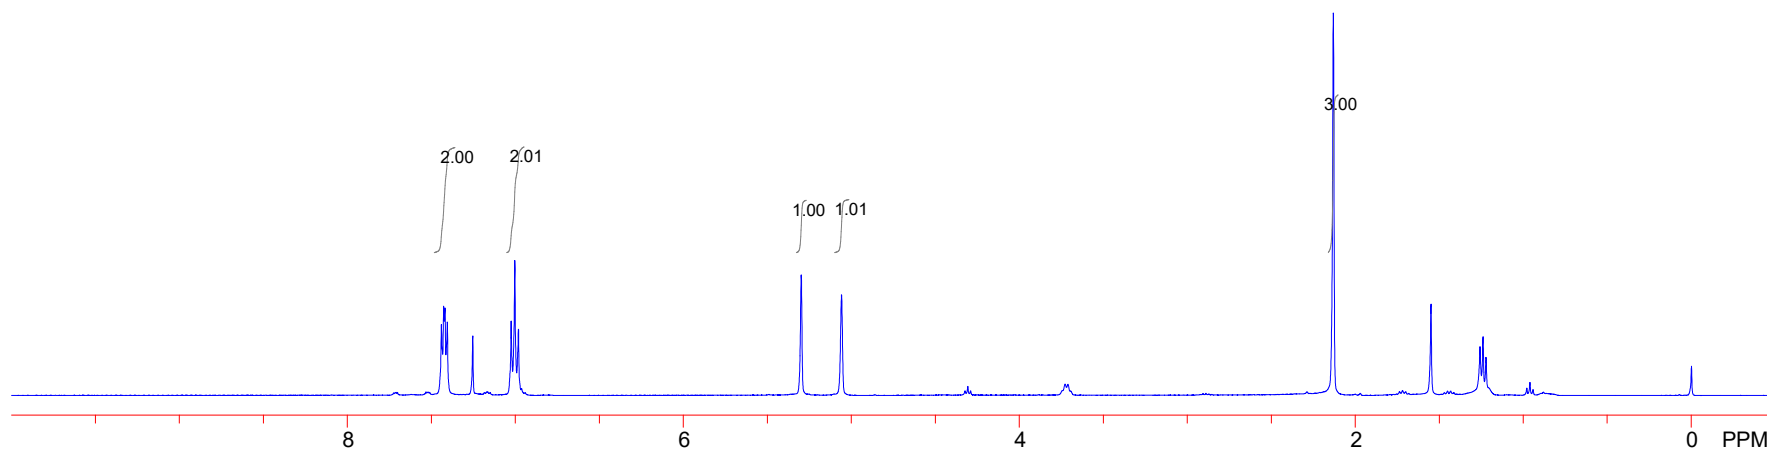

S172

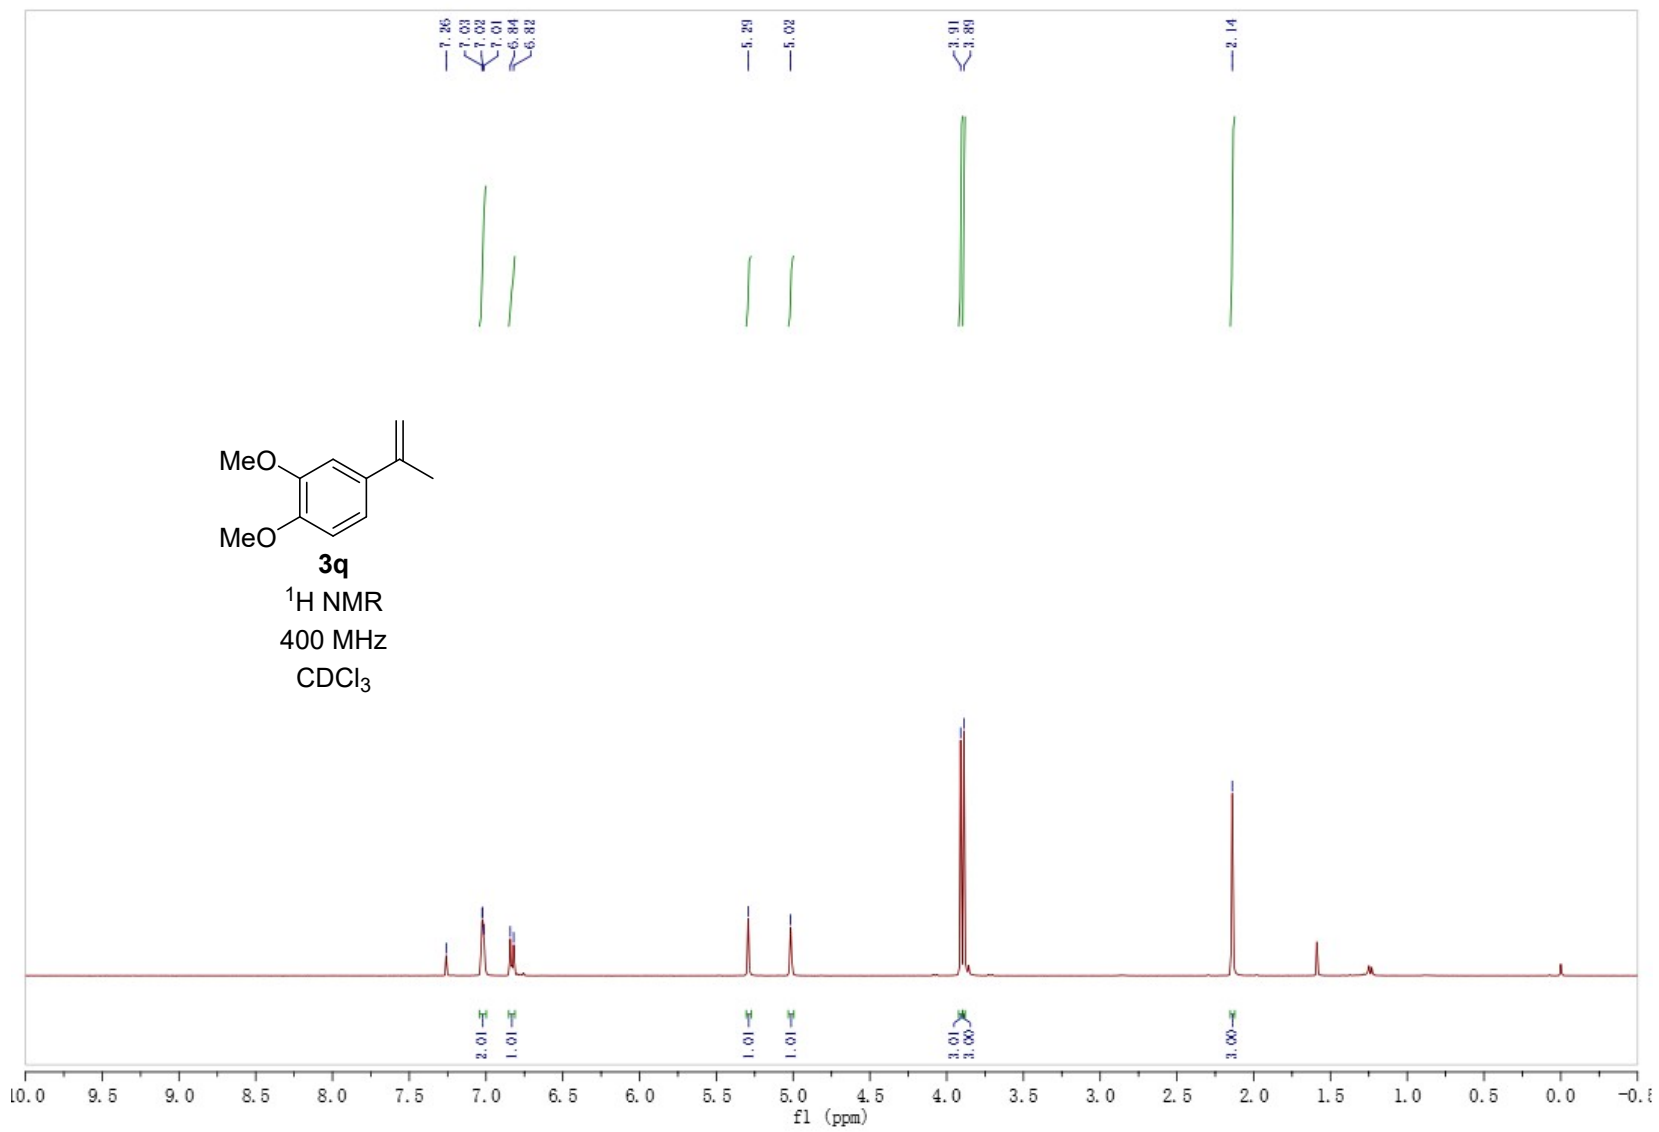

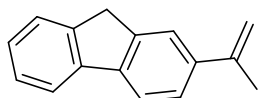

**3r**

<sup>1</sup>H NMR  
400 MHz  
CDCl<sub>3</sub>

7.782  
7.764  
7.741  
7.722  
7.657  
7.547  
7.529  
7.513  
7.491  
7.370  
7.311  
7.292  
7.258

5.430

5.105

3.907

2.216

1.546

1.254

-0.001

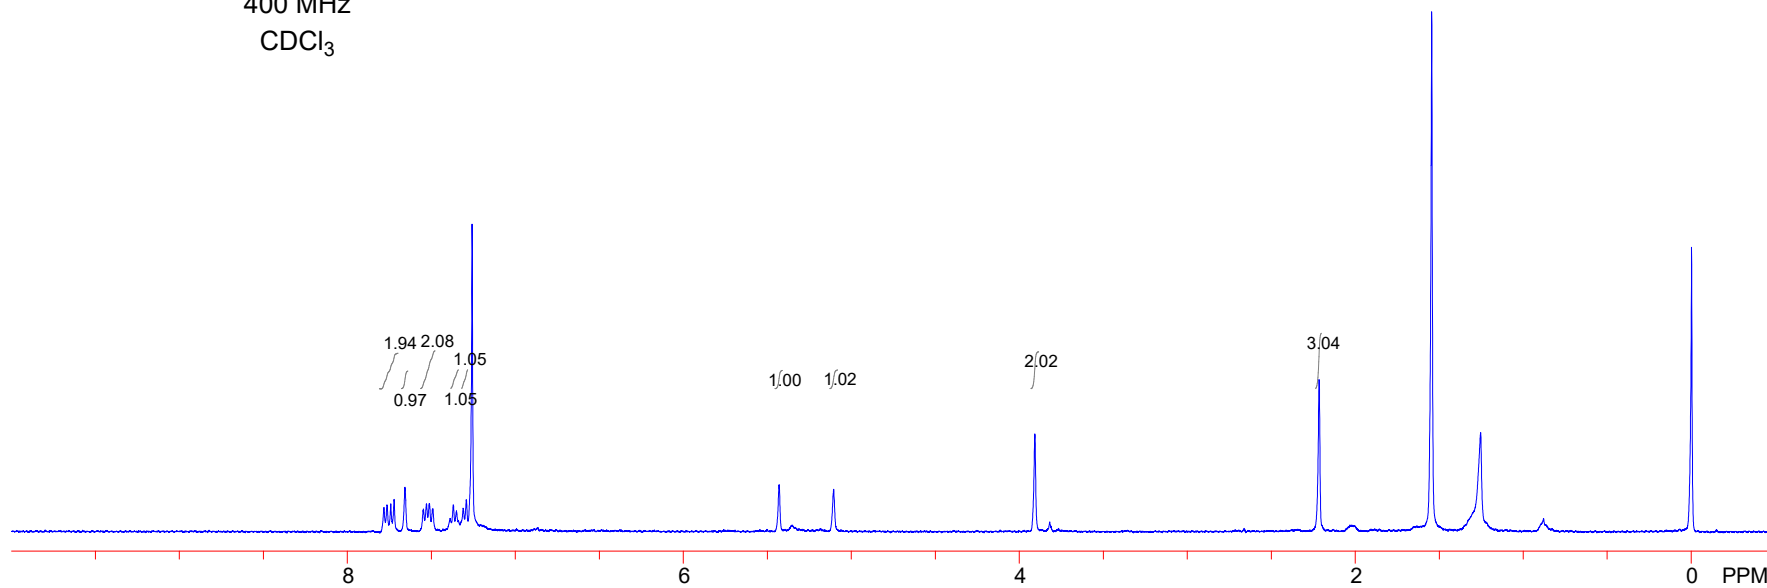

S174

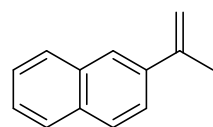

**3s**

<sup>1</sup>H NMR  
400 MHz  
CDCl<sub>3</sub>

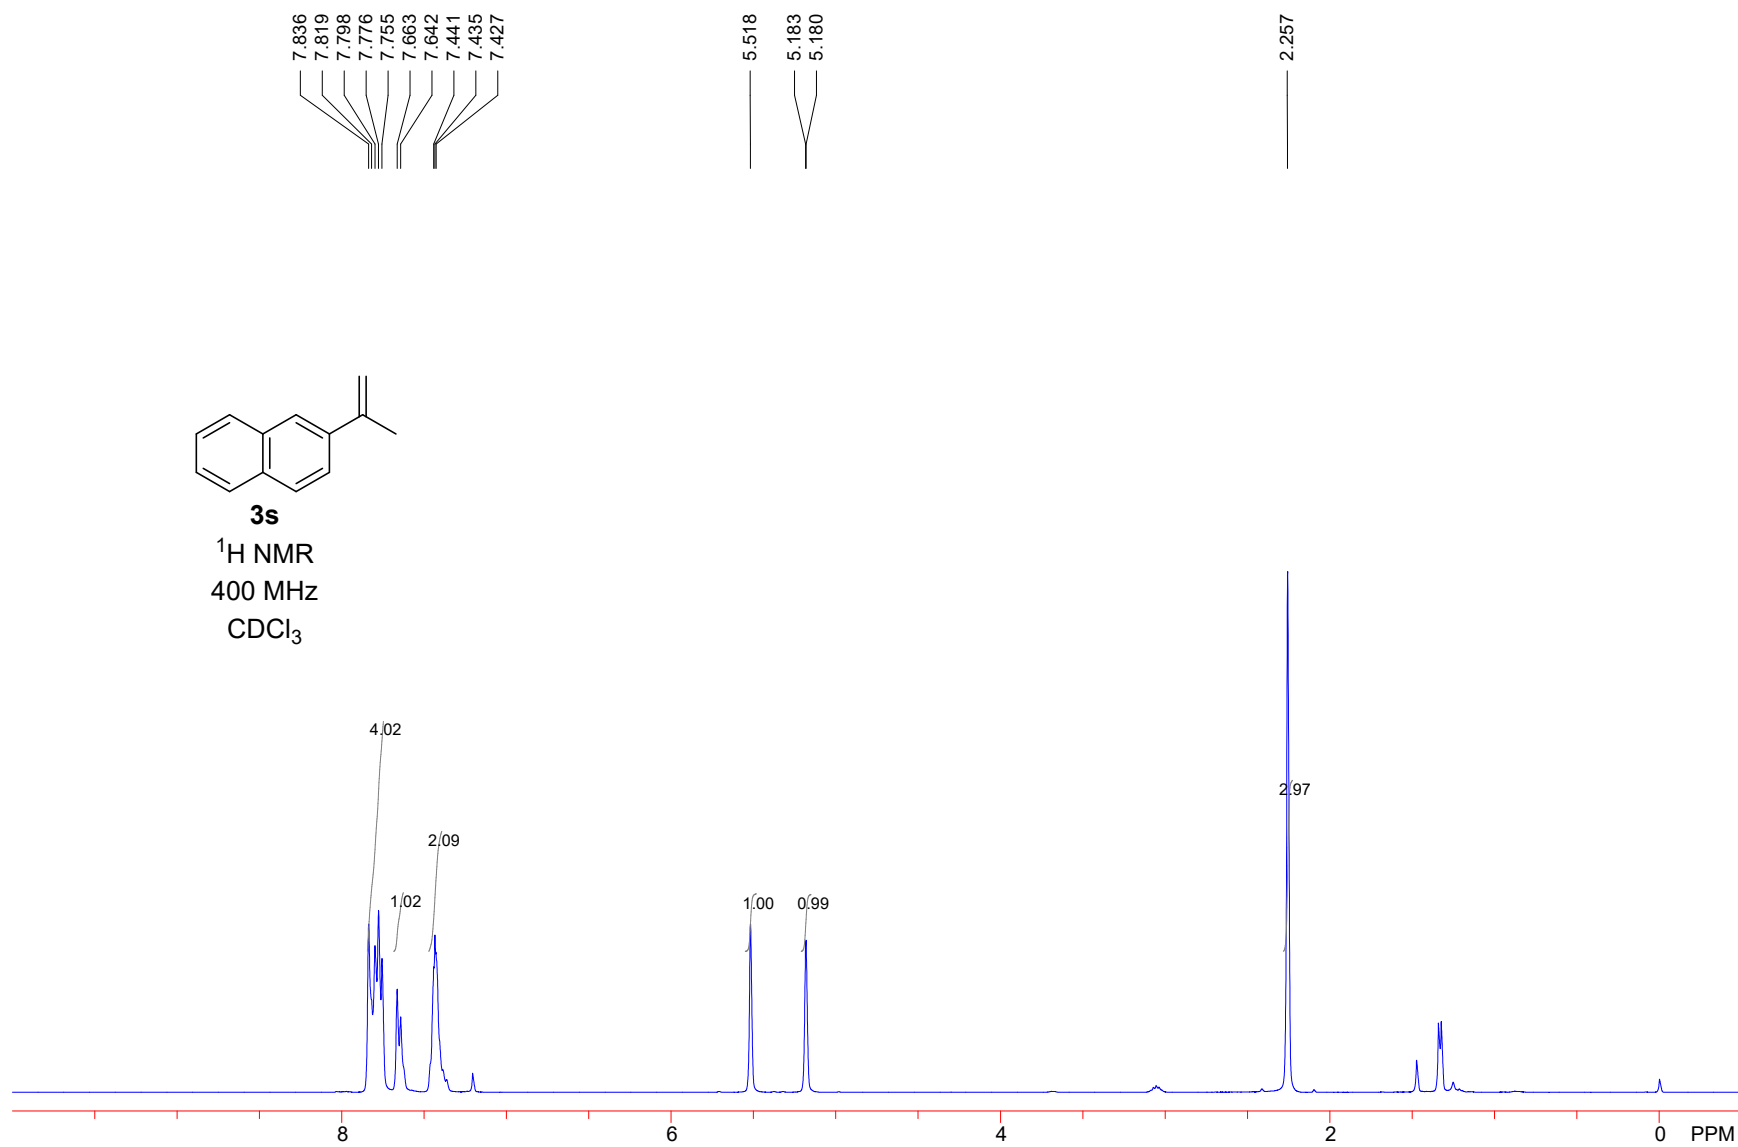

S175

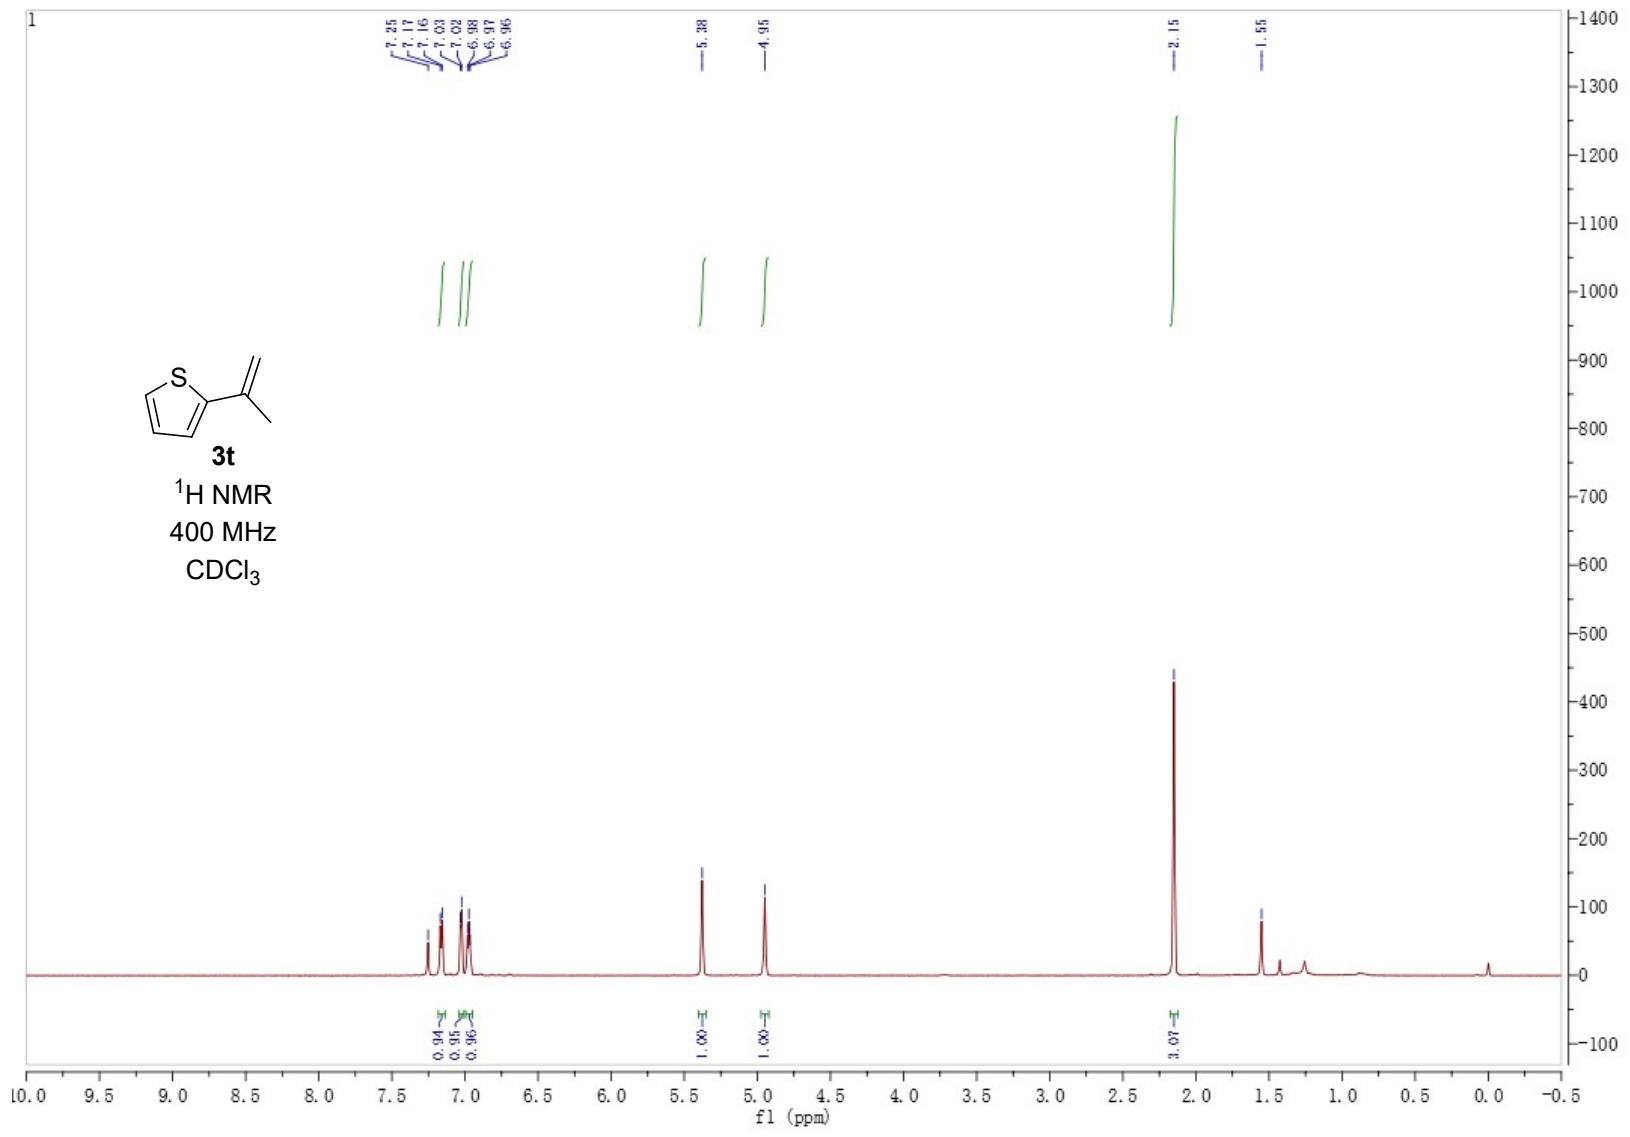



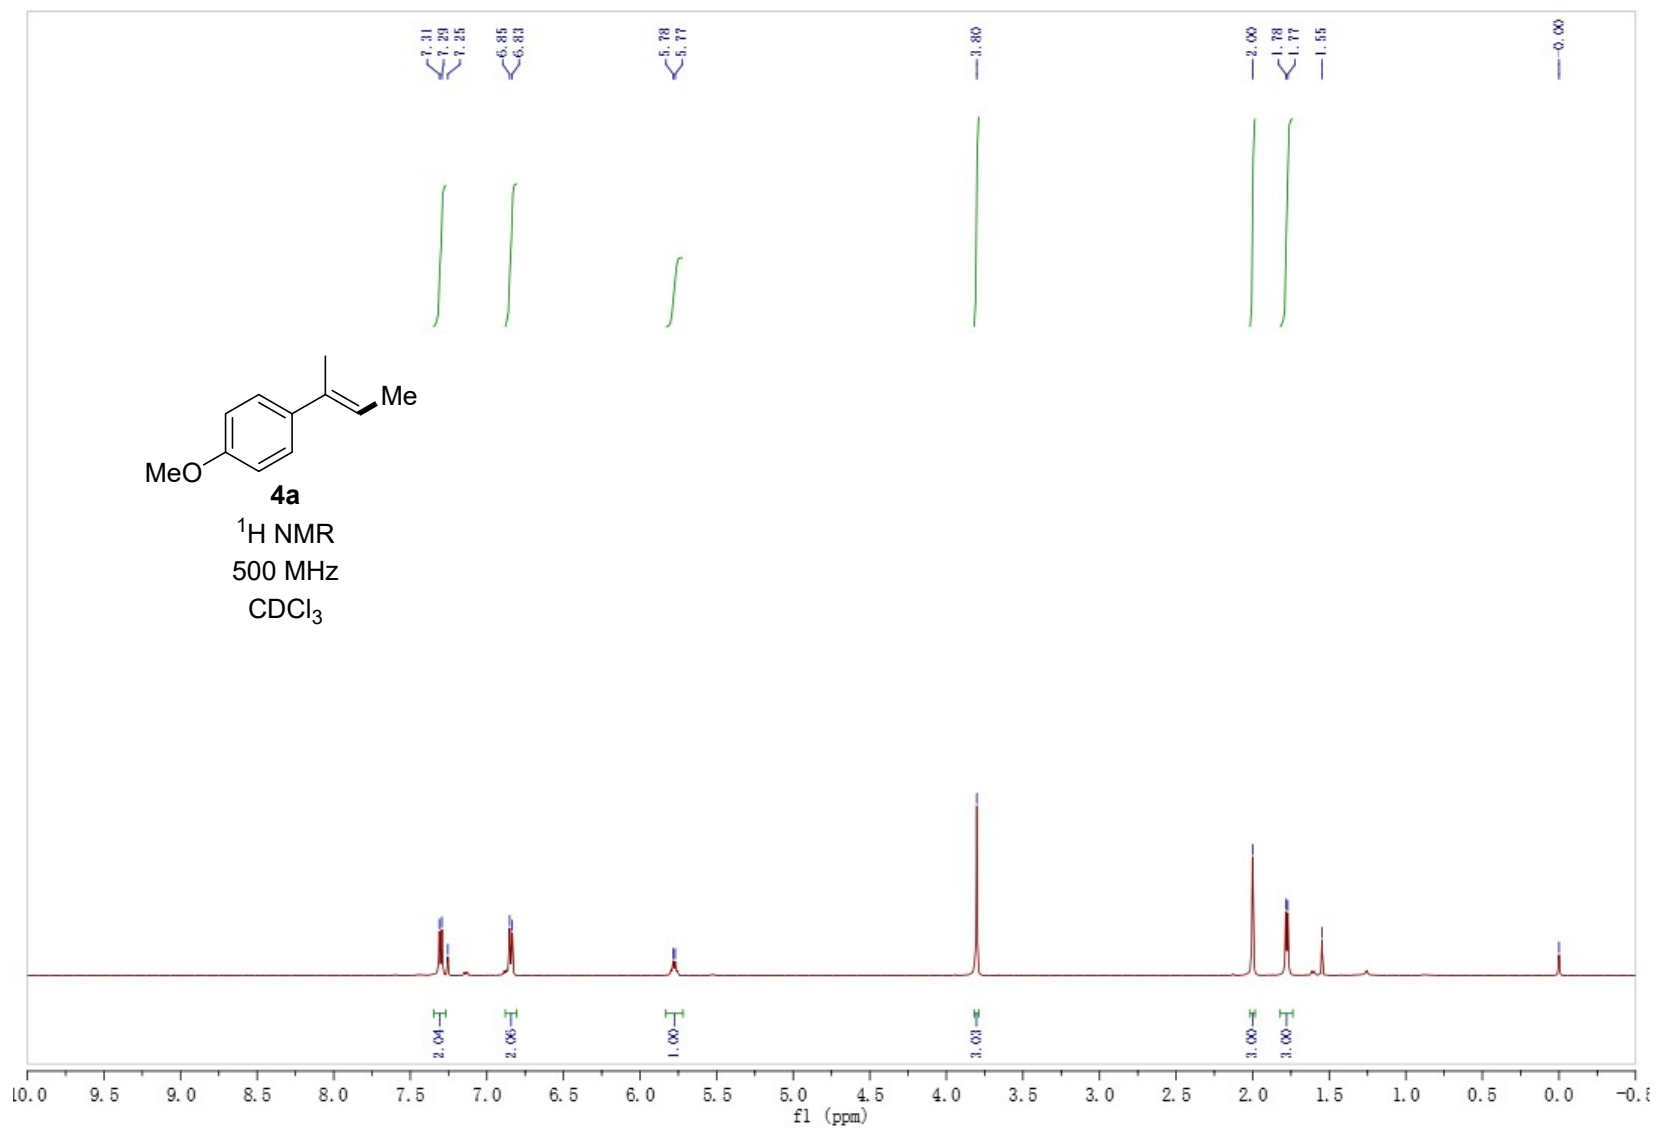

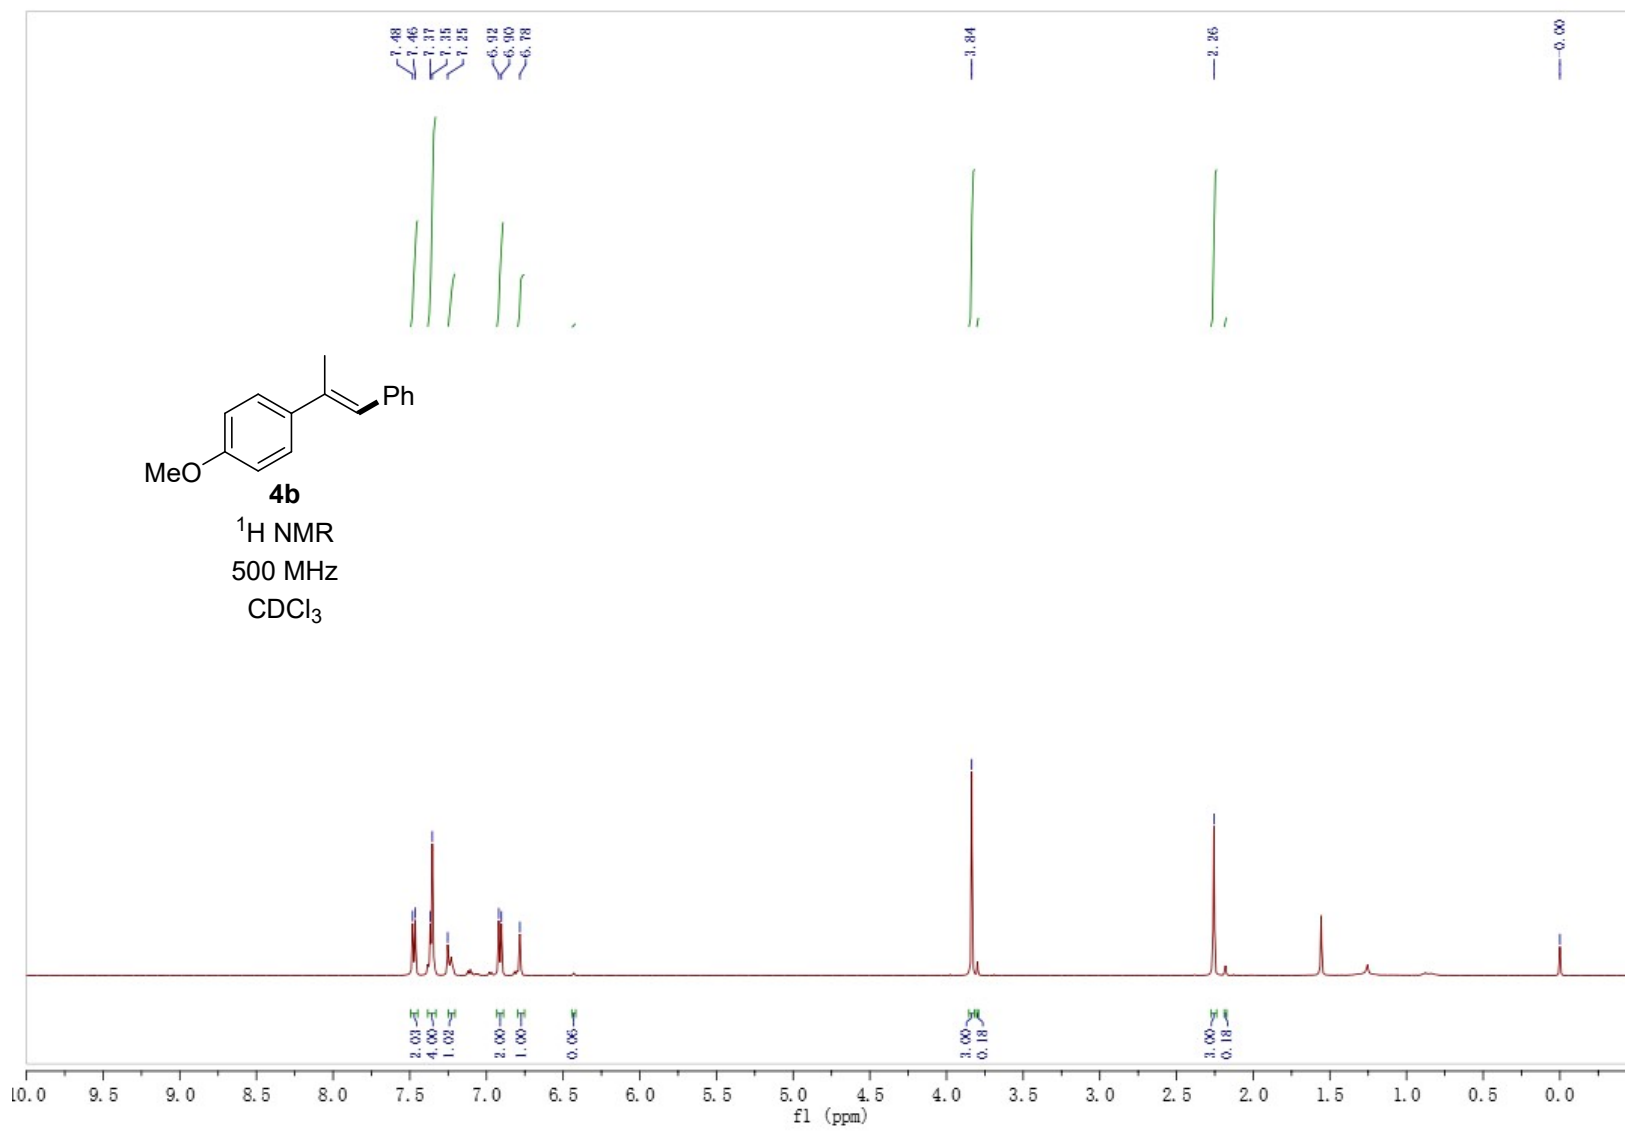

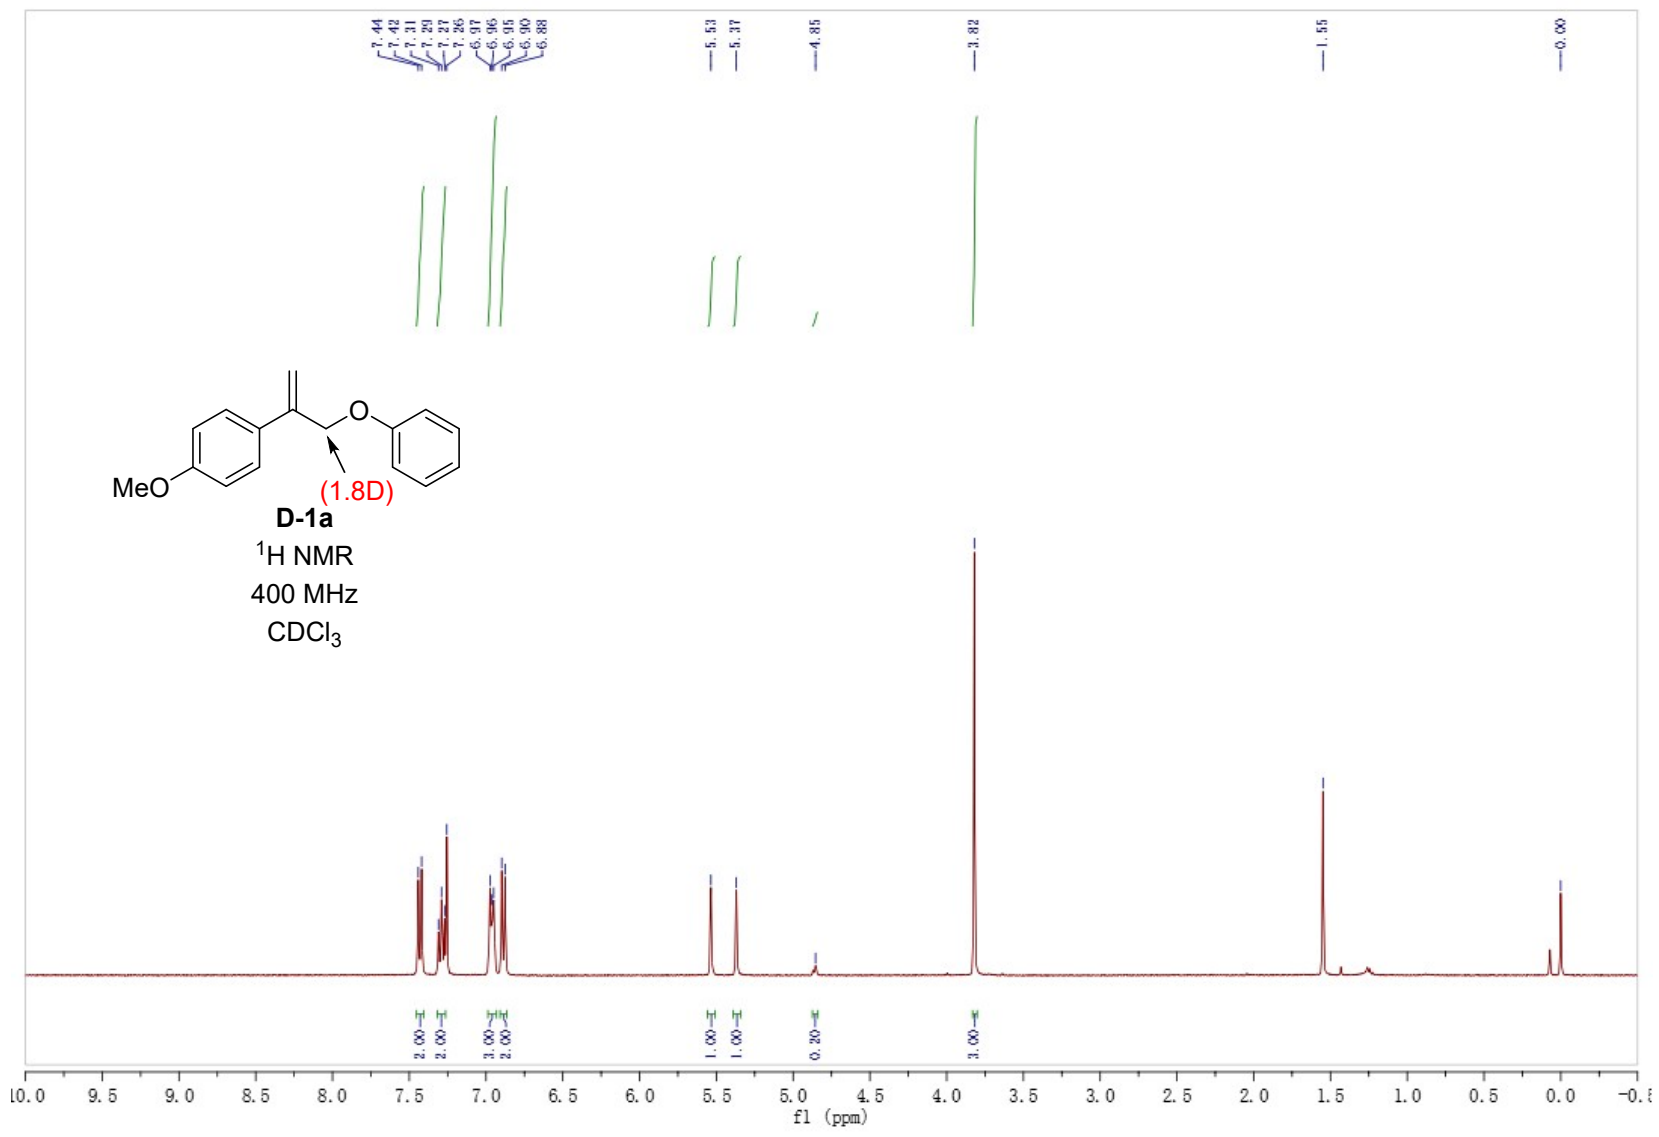

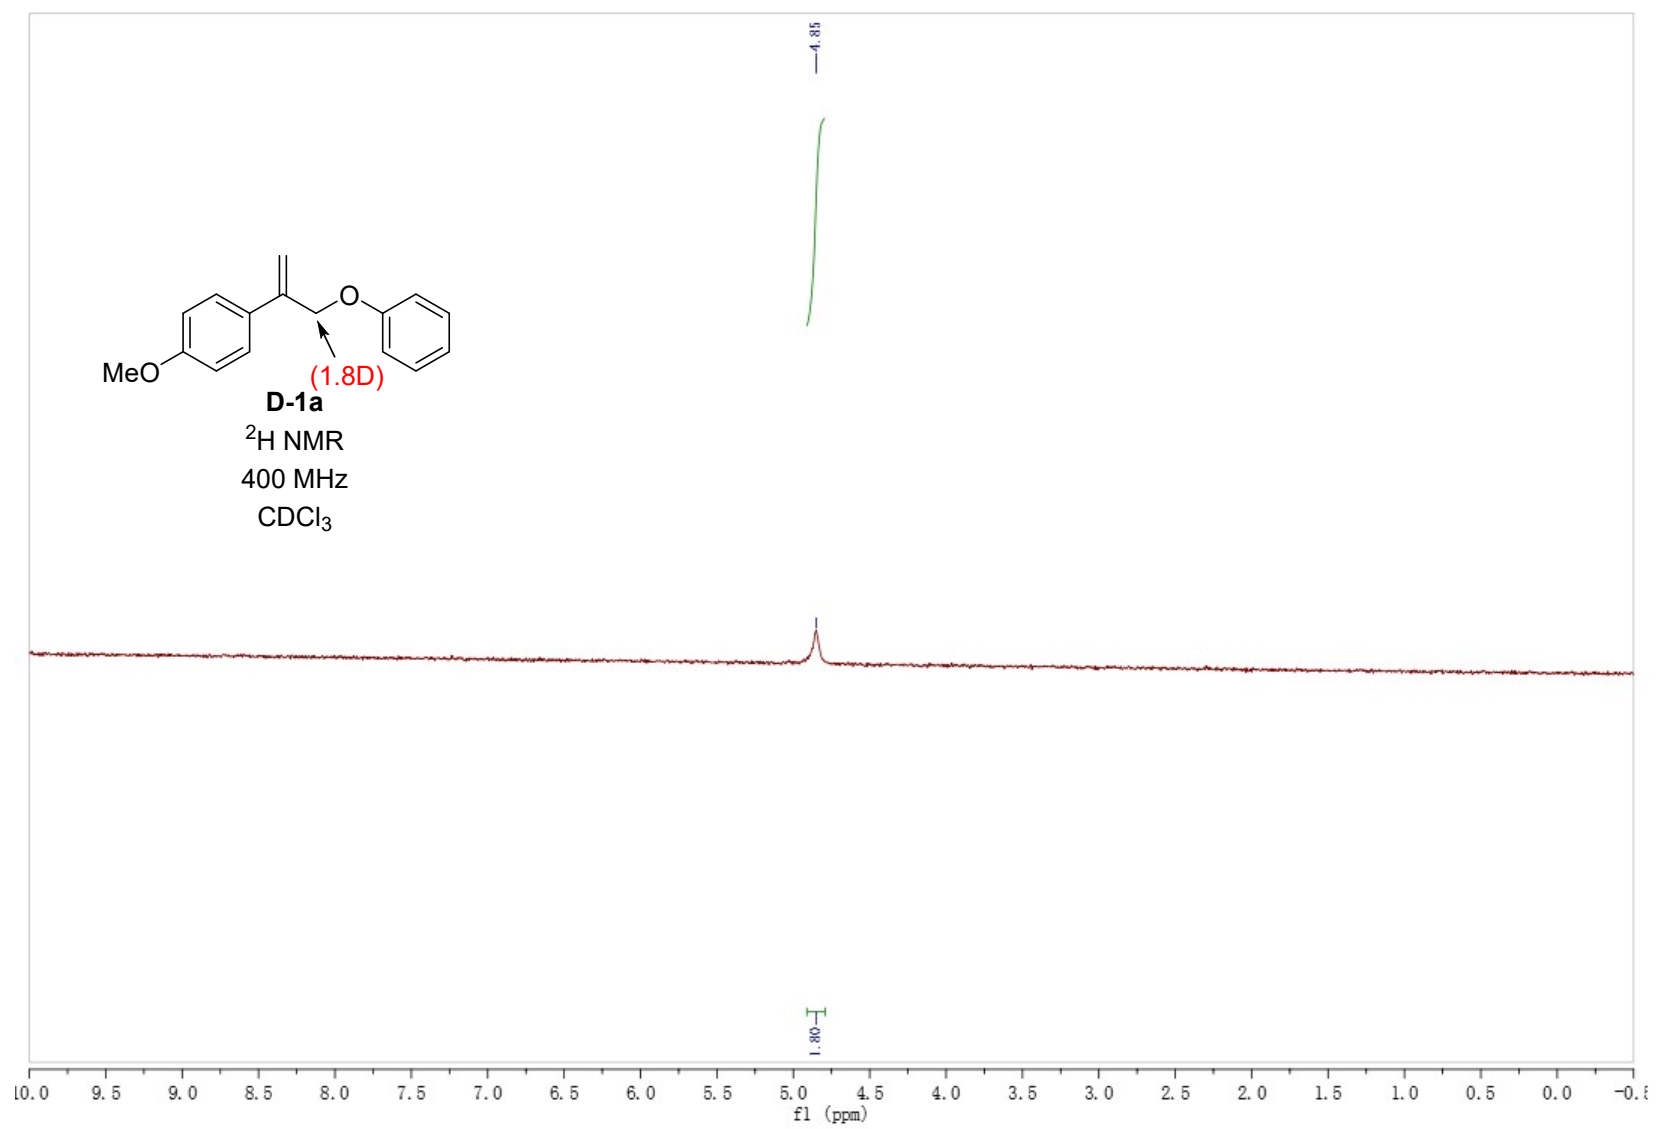

S180

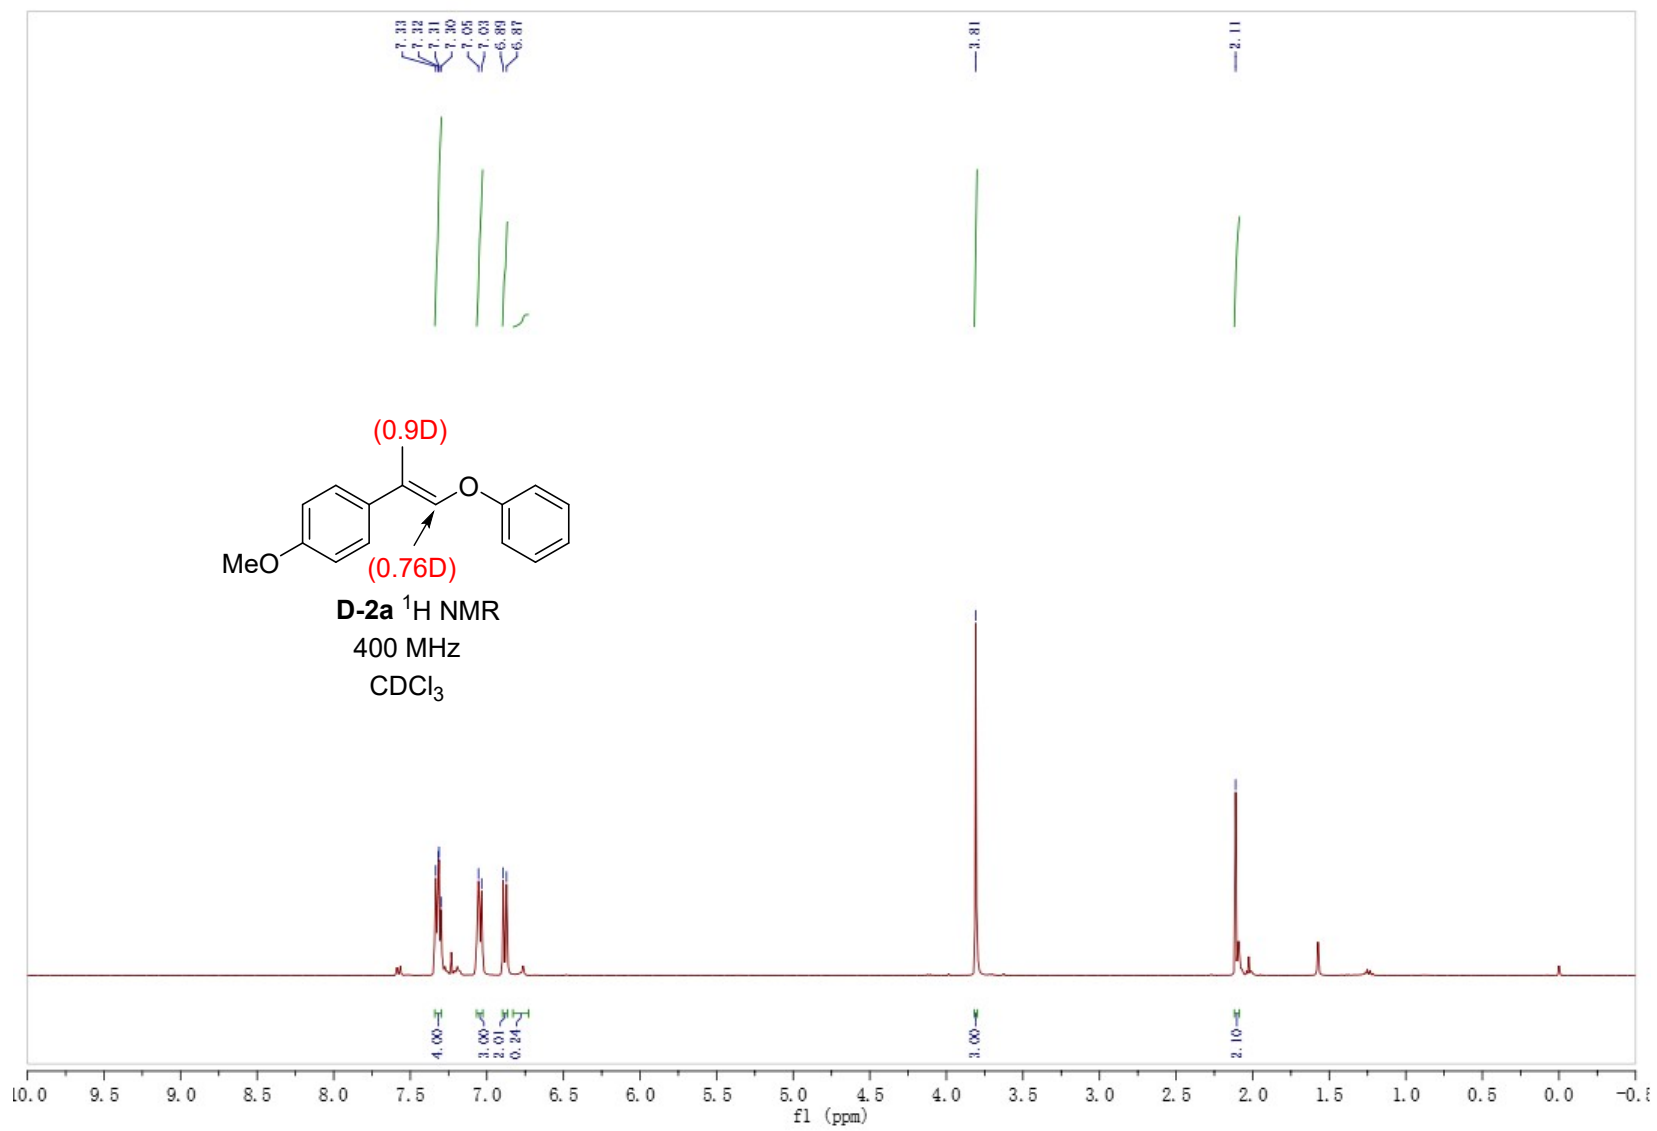

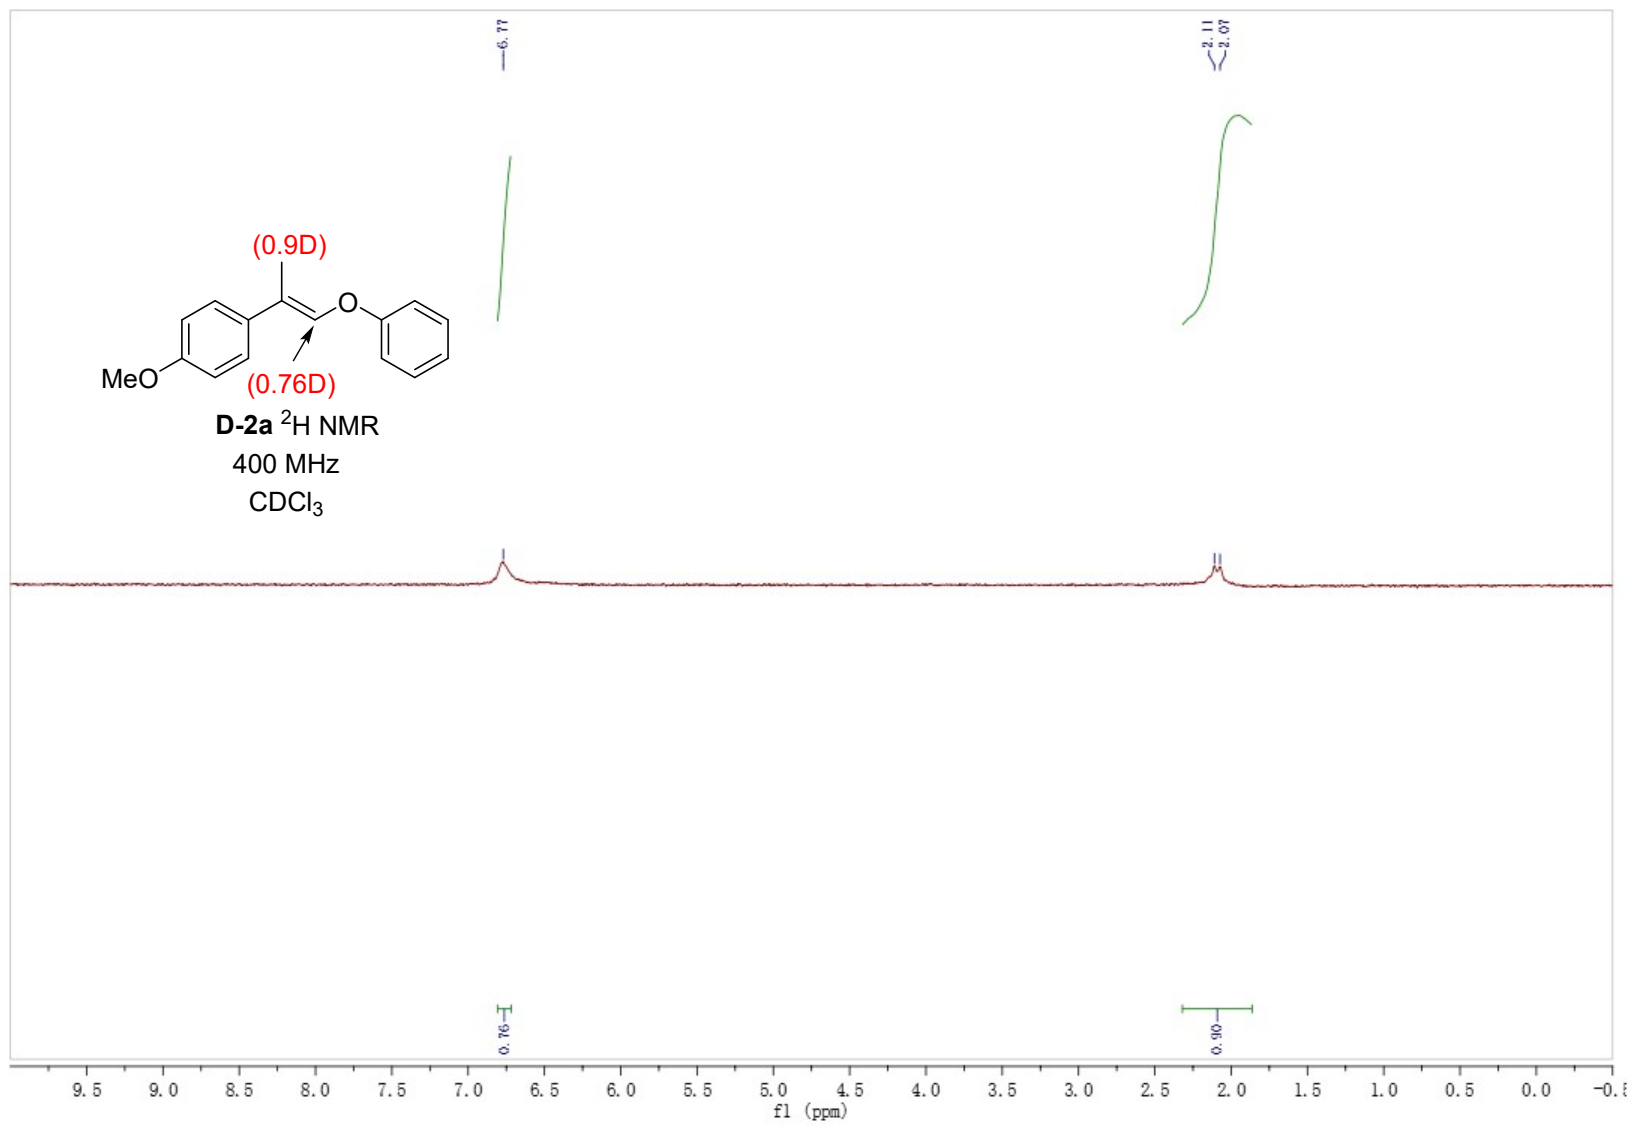

S182

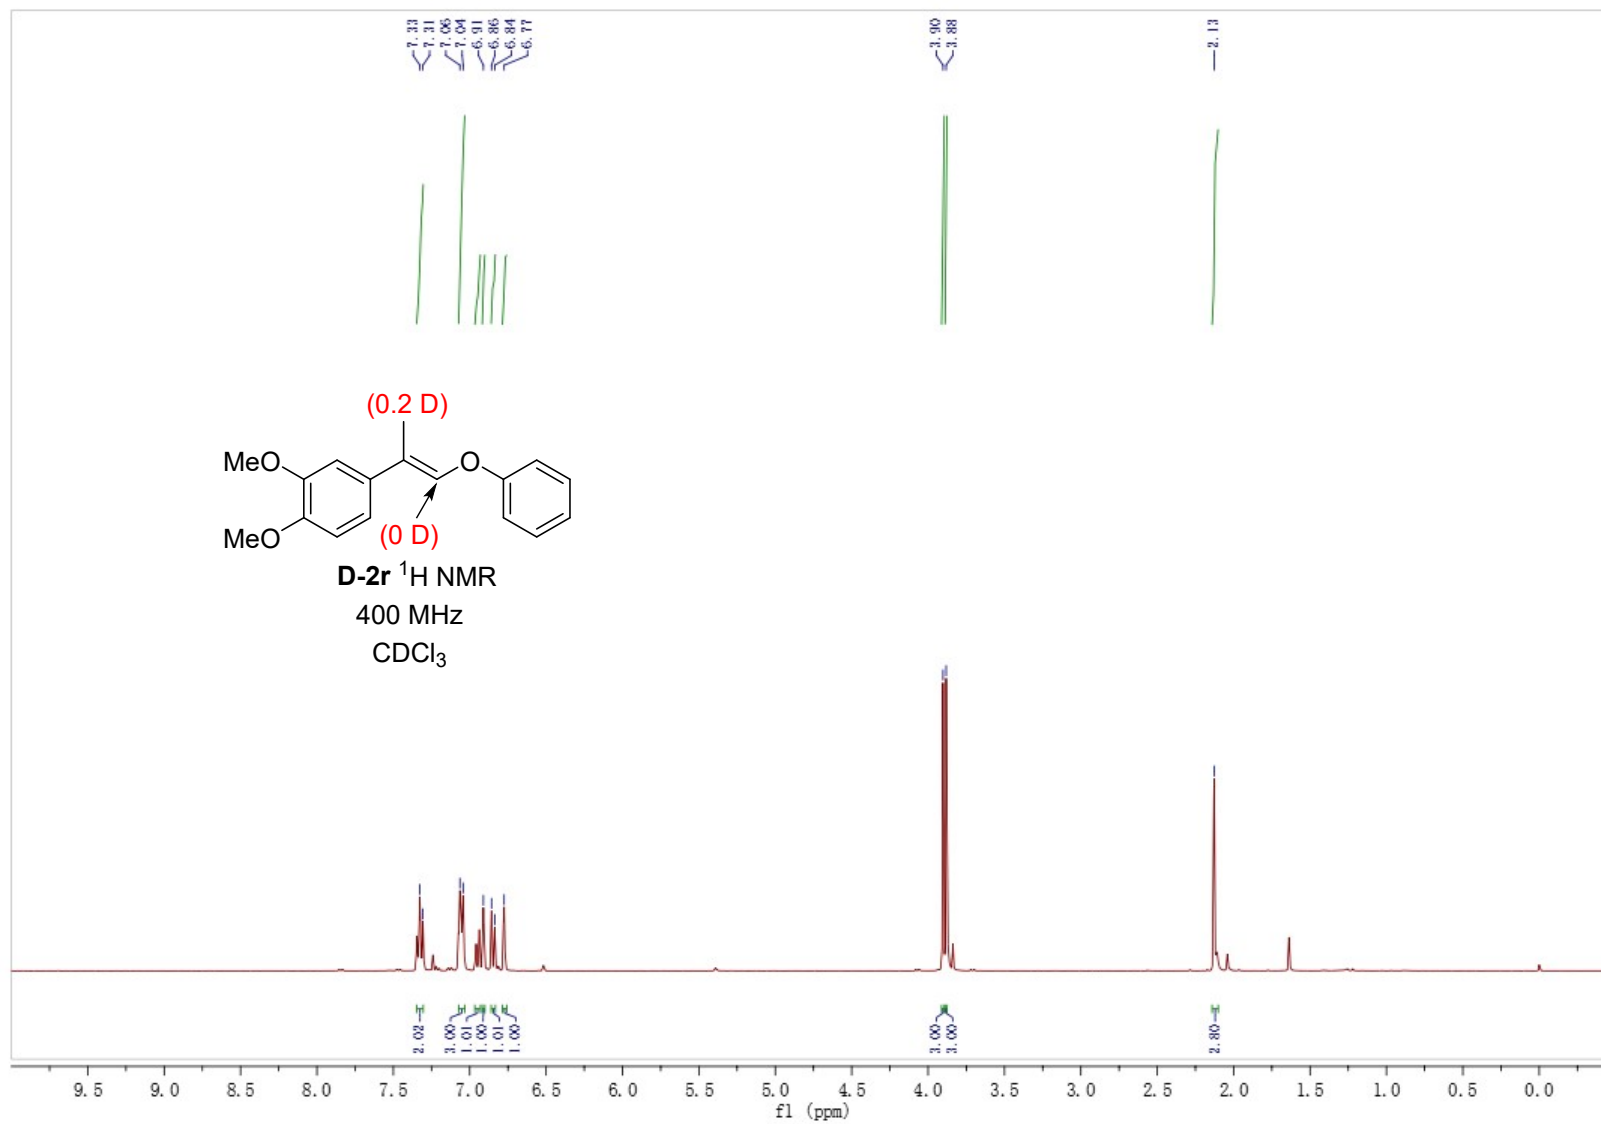

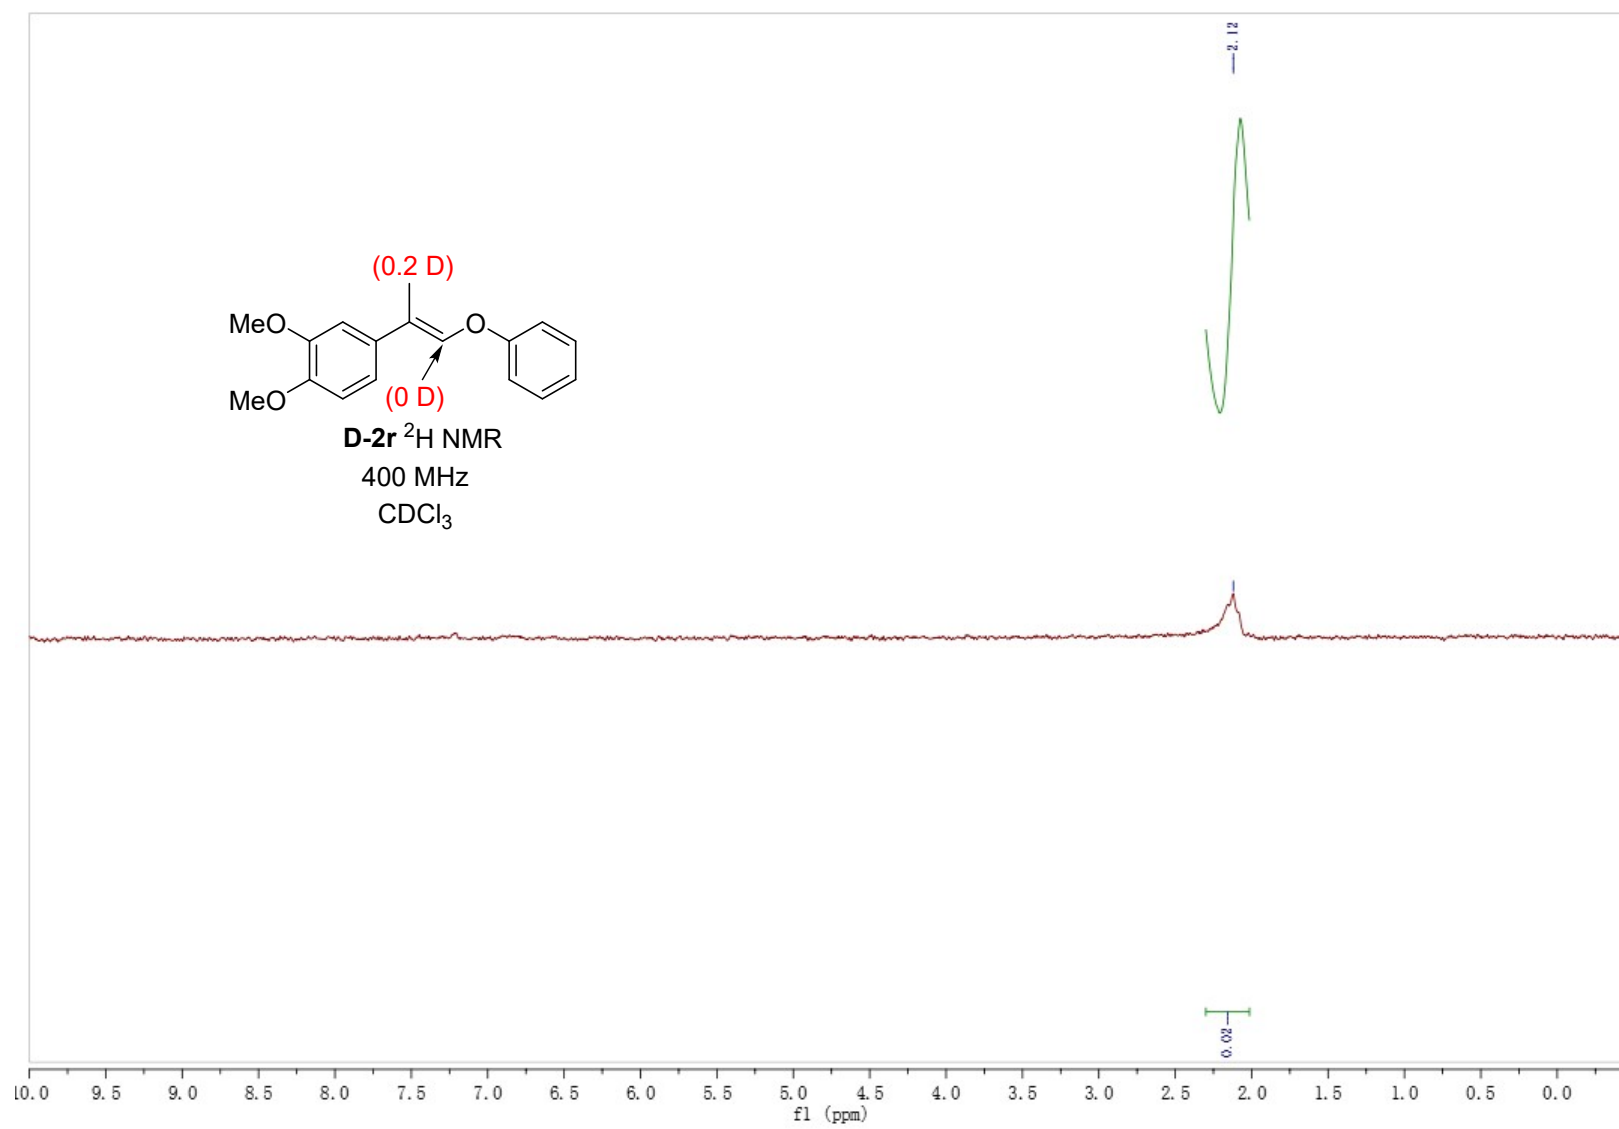



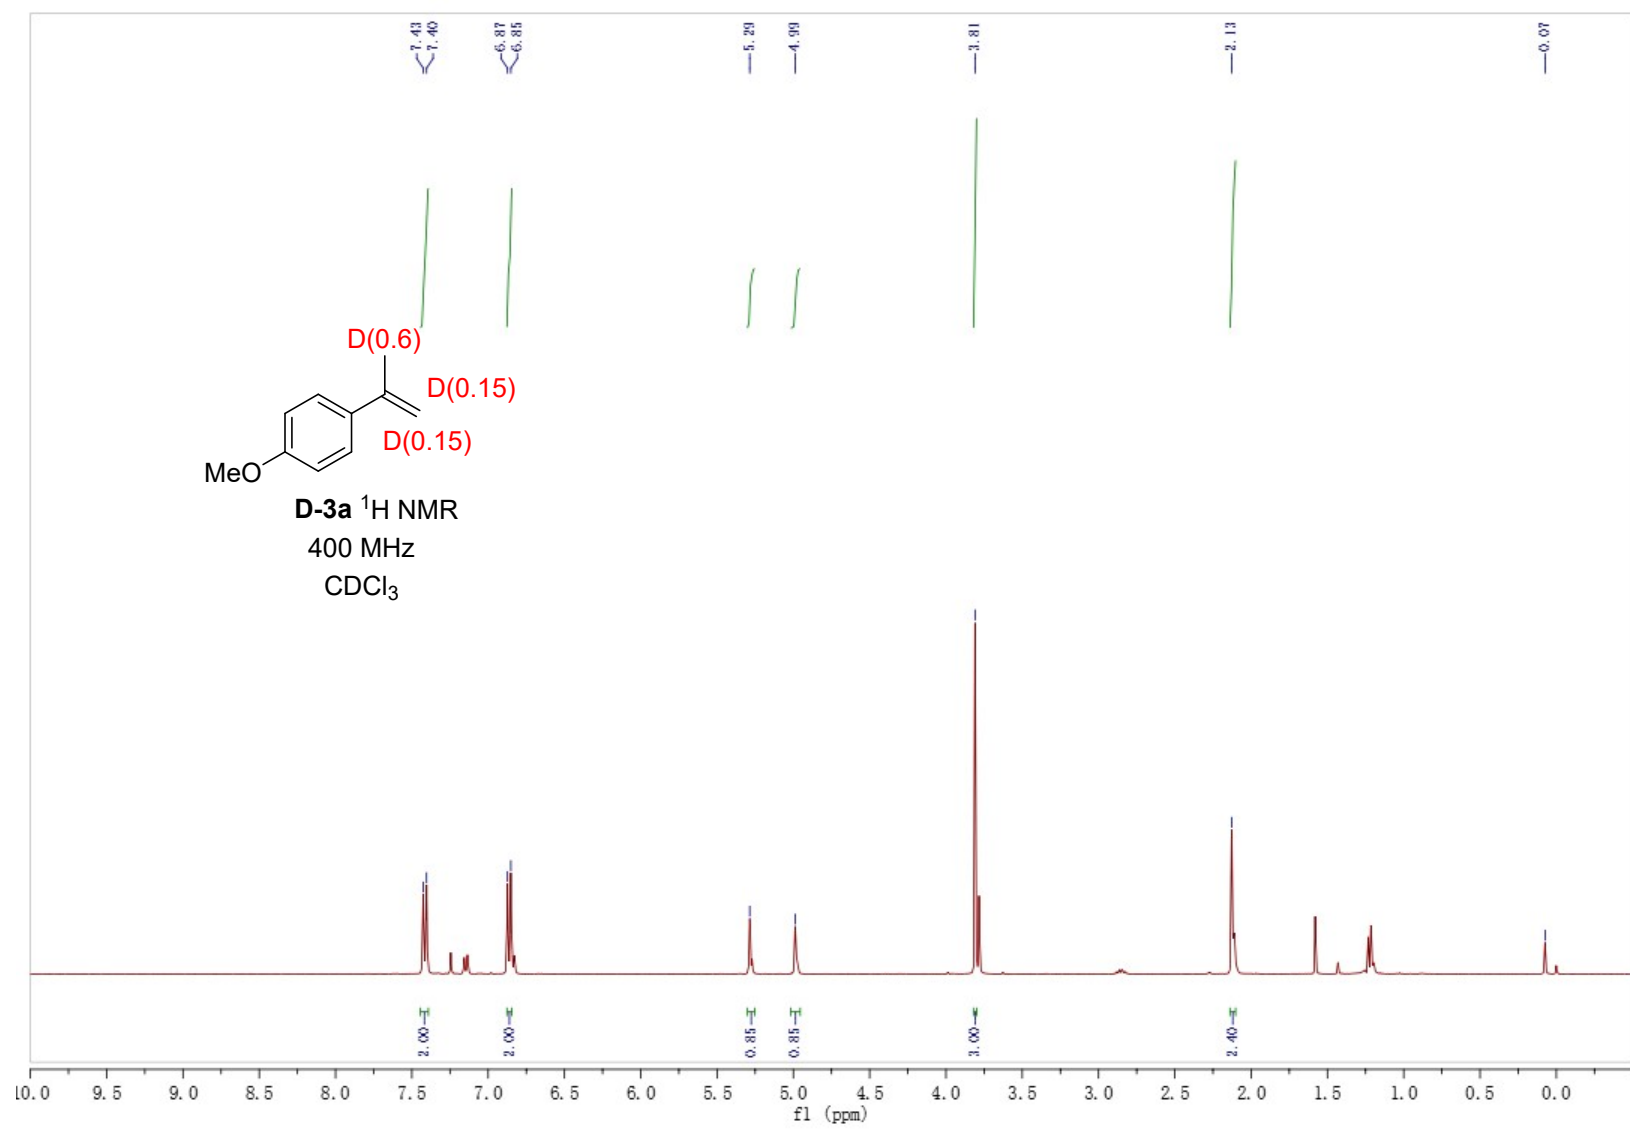

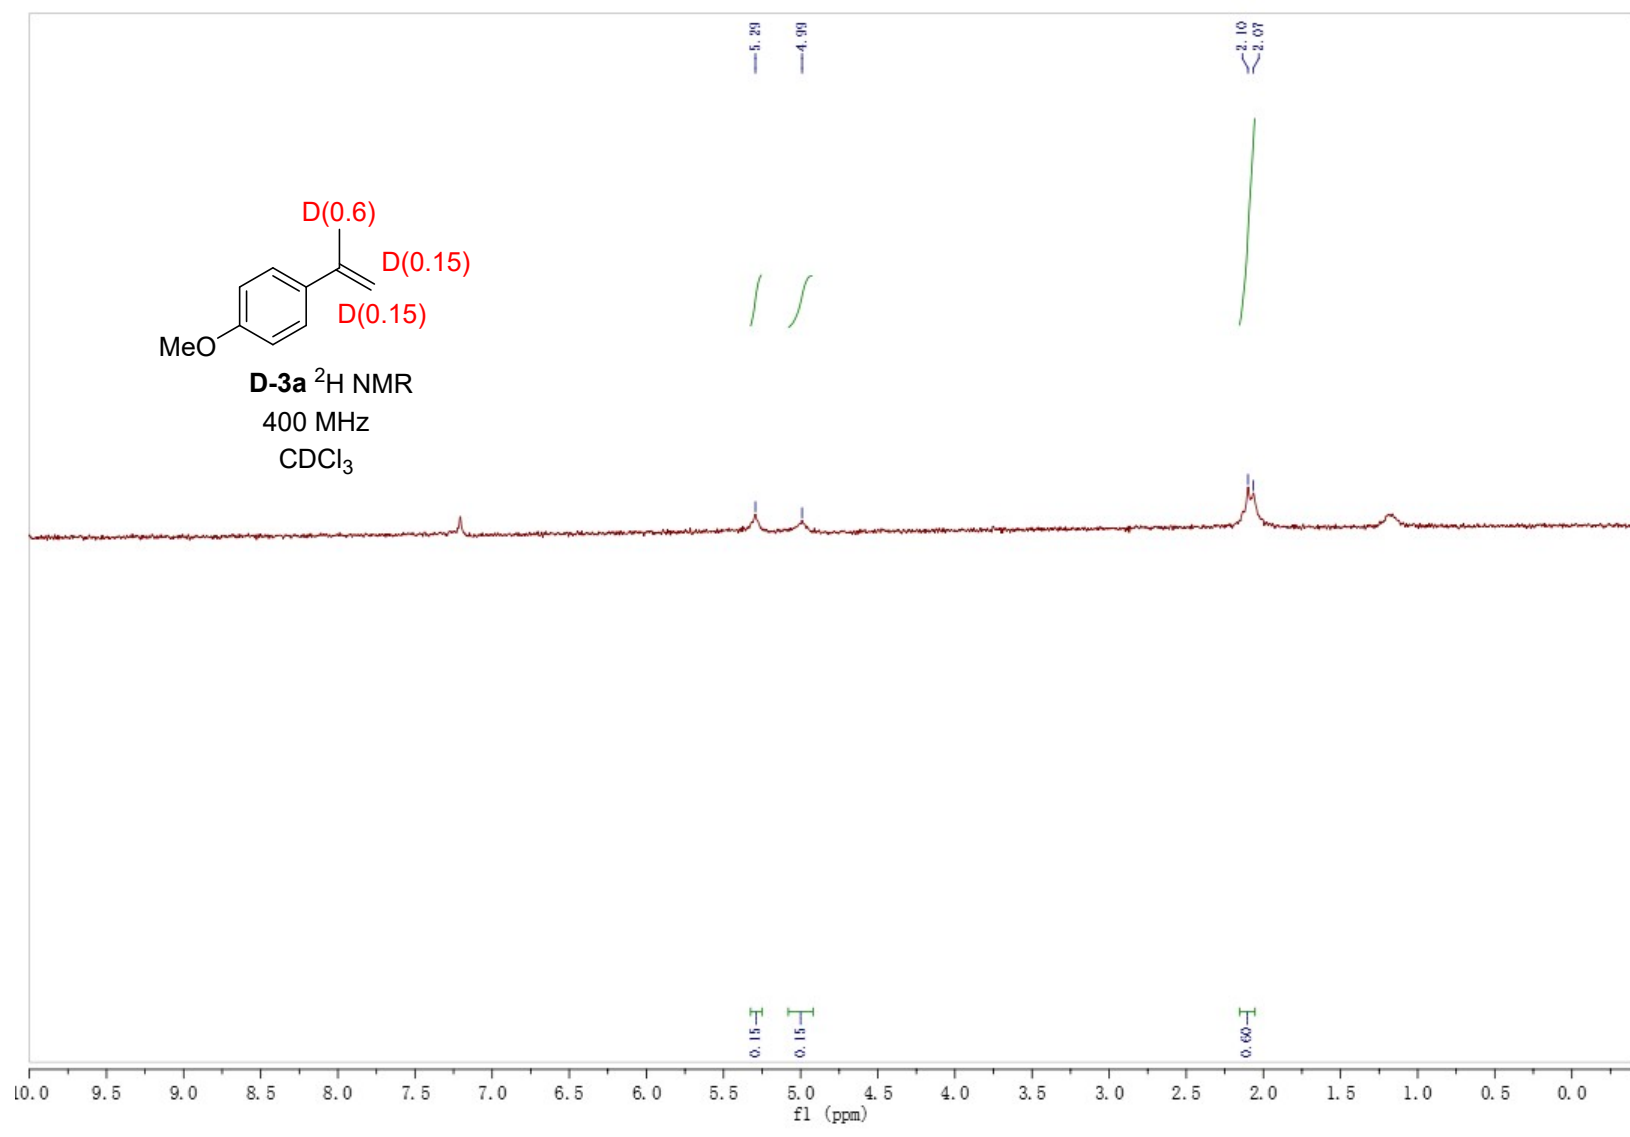

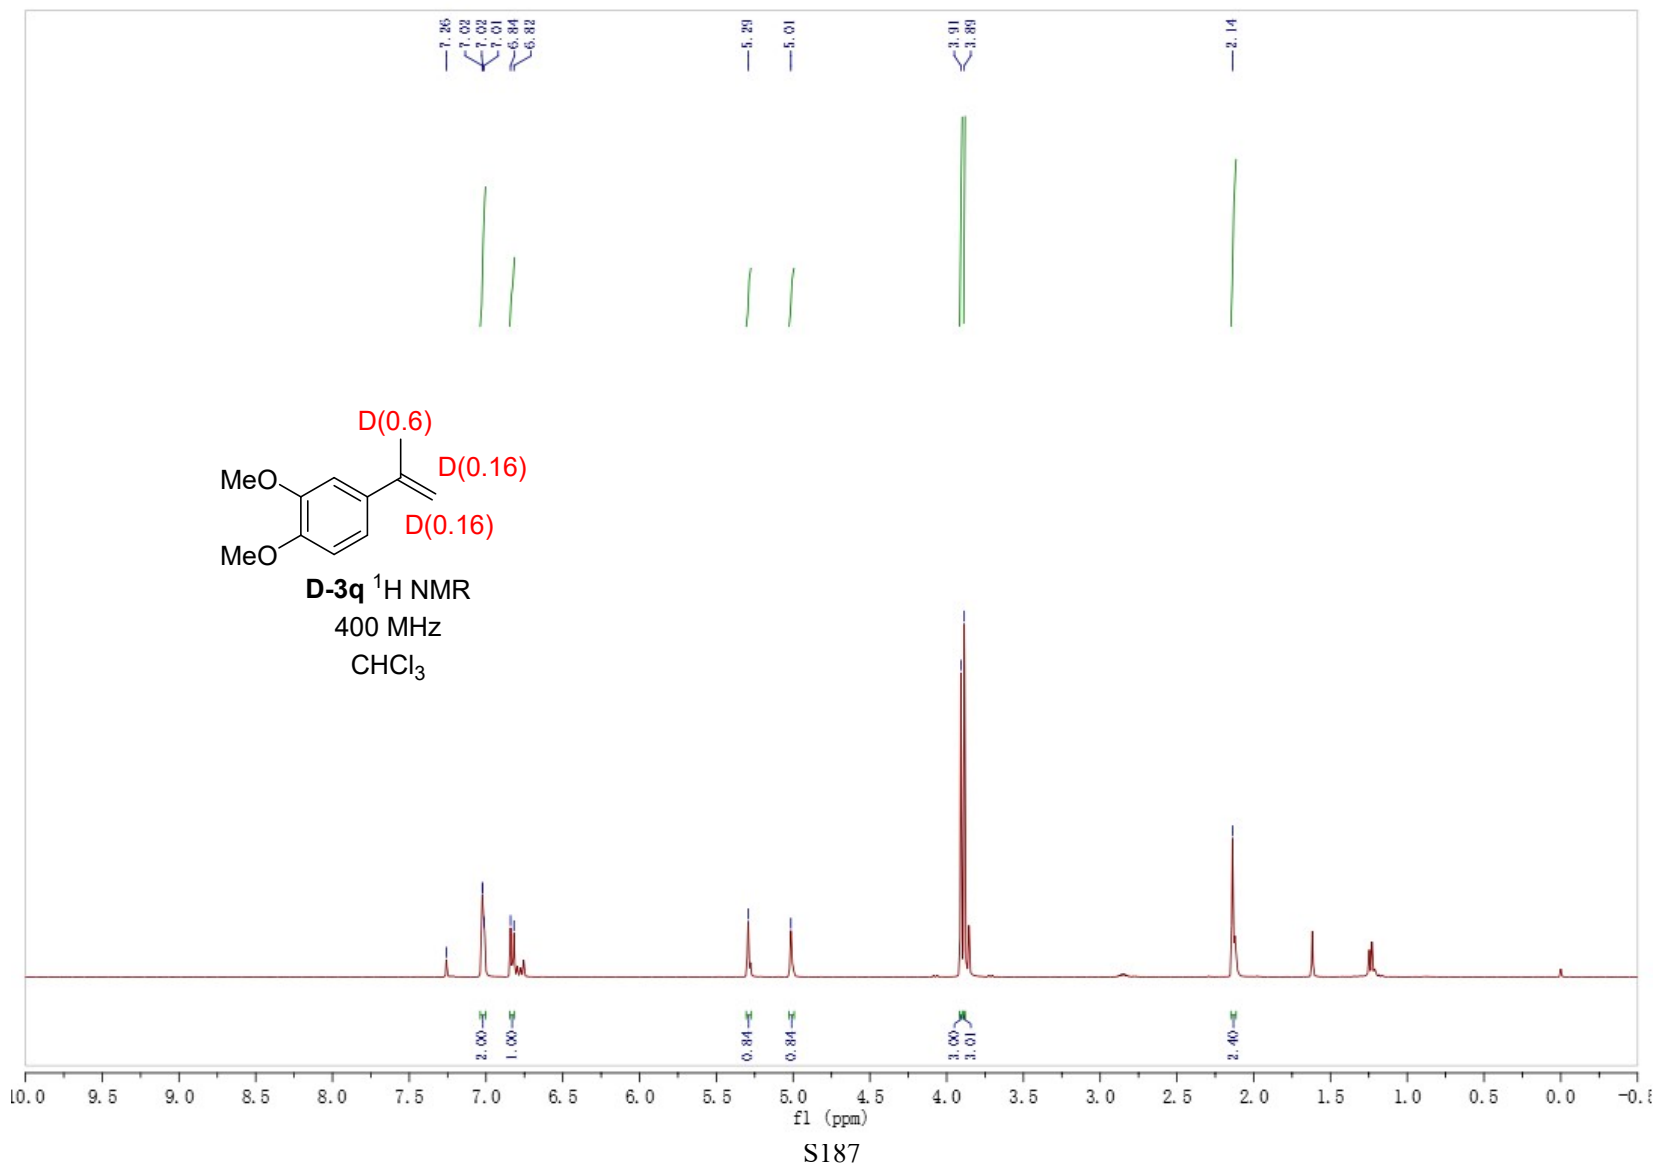

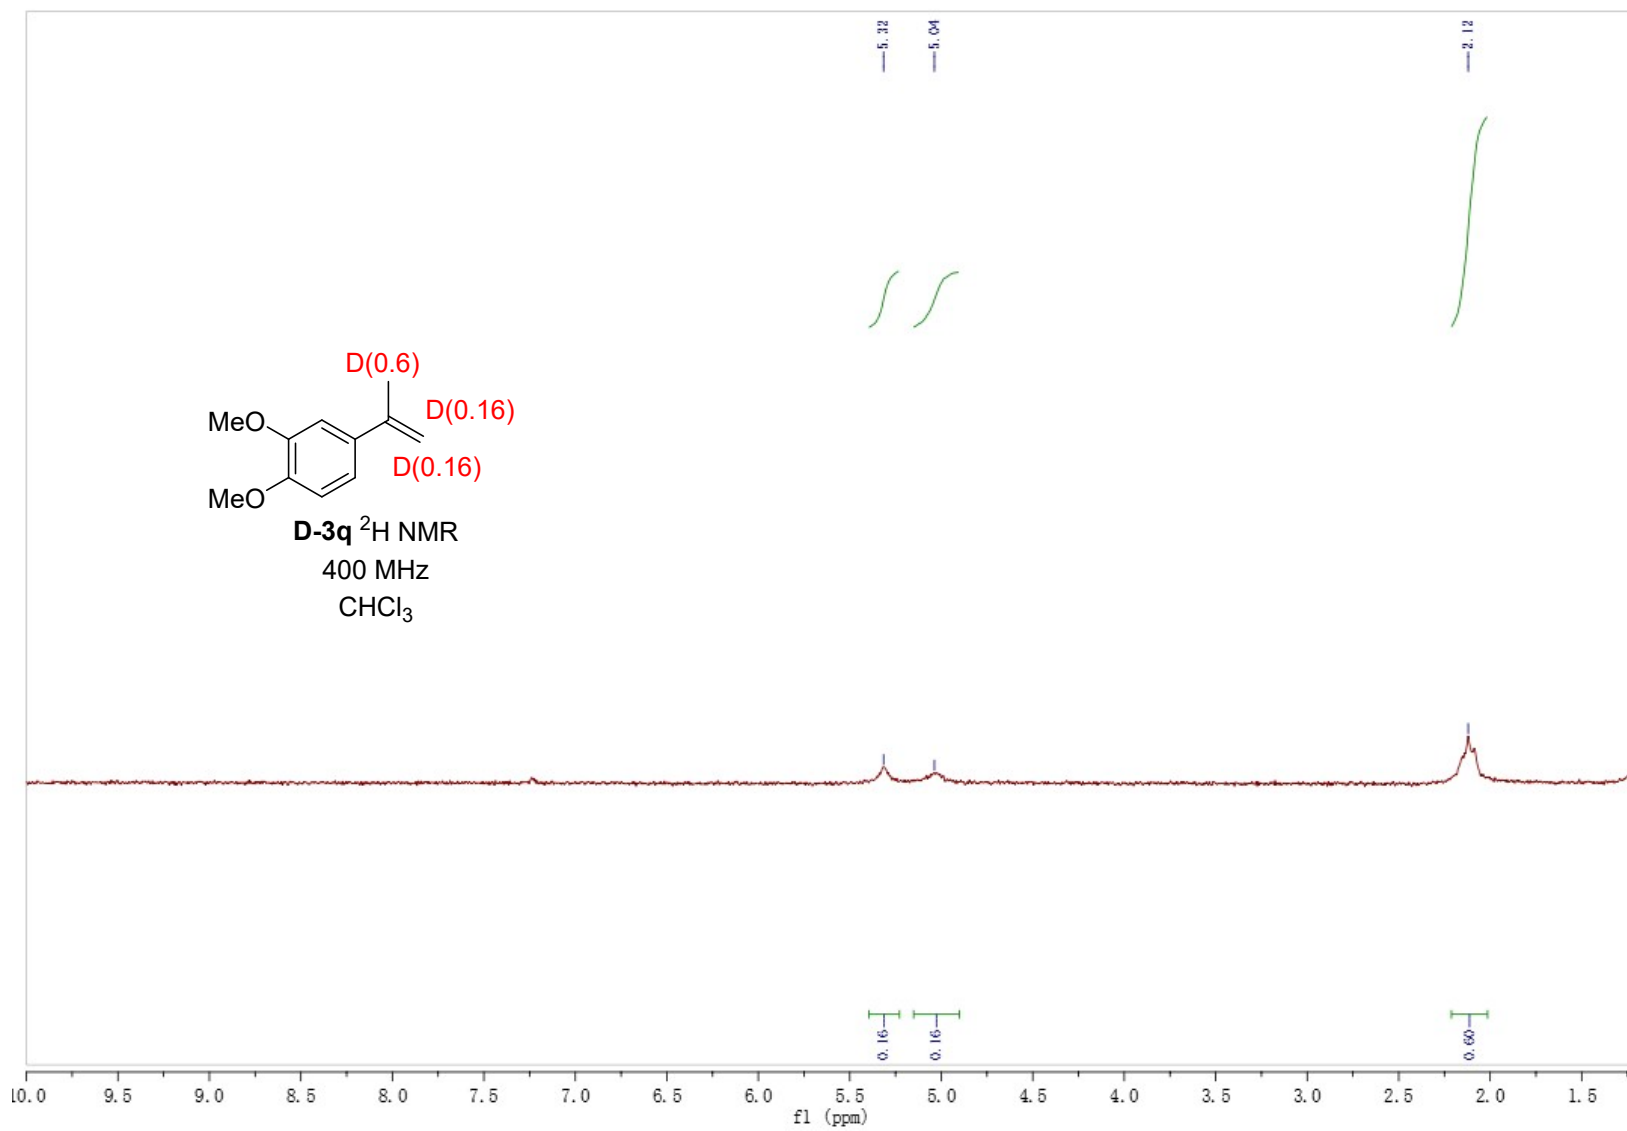

S188
